# Supplementary material for: Visible-light-promoted selective O-alkylation of 2-pyridones with α-aryldiazoacetates
Source: Royal Society of Chemistry journal article supplement (doi:10.1039/d0ob02350g), 2020-12-08

## Supporting Information

for

### Visible-Light-Promoted Selective *O*-Alkylation of 2-Pyridones with $\alpha$ -Aryldiazoacetates

Jingya Yang,<sup>\*a</sup> Ganggang Wang,<sup>a</sup> Hongyan Zhou,<sup>\*a,b</sup> Zhifeng Li,<sup>c</sup> Ben Ma,<sup>a</sup> Menghui Song,<sup>a</sup> Rongxia Sun<sup>a</sup>  
and Congde Huo<sup>\*a</sup>

<sup>a</sup>College of Chemistry and Chemical Engineering, Northwest Normal University, Lanzhou 730070, China

<sup>b</sup>College of Science, Gansu Agricultural University, Lanzhou 730070, China

<sup>c</sup>College of Chemical Engineering and Technology, Tianshui Normal University, Tianshui 741000, China

E-mail: yangjy@nwnu.edu.cn; zhouhy@gsau.edu.cn; huocongde1978@hotmail.com

### List of Contents

|                                                                       |     |
|-----------------------------------------------------------------------|-----|
| 1. General Information.....                                           | S2  |
| 2. UV-Vis Absorption Spectra.....                                     | S3  |
| 3. NMR Studies Whether There Are Hydrogen-Bond Interactions.....      | S3  |
| 4. General Procedure for Preparation of Substrates.....               | S4  |
| 5. Optimization of Reaction Conditions.....                           | S5  |
| 6. General Procedure for the <i>O</i> -Alkylation of 2-Pyridones..... | S6  |
| 7. Characterization Data of Products.....                             | S6  |
| 8. Gram-Scale and Control Experiments.....                            | S27 |
| 9. Quantum Chemical Calculations.....                                 | S31 |
| 10. References.....                                                   | S32 |
| 11. Cope of NMR Spectra.....                                          | S32 |

## 1. General Information

$^1\text{H}$  NMR,  $^{13}\text{C}$  NMR and  $^{19}\text{F}$  NMR spectra were recorded on a Varian Mercury-400 Plus or Agilent Technologies DD2 (600 MHz) spectrometers in  $\text{CDCl}_3$ . Chemical shifts ( $\delta$ ) for NMR were quoted in ppm relative to the solvent peak (7.26 ppm for  $^1\text{H}$  and 77.0 ppm for  $^{13}\text{C}$  in  $\text{CDCl}_3$ ), Coupling constants  $J$  are recorded in Hz. High-resolution mass spectra (HRMS) were reported from the Thermo Orbitrap Elite or Bruker Daltonics APEXII 47e FT-ICR instrument with an ESI source. UV-Visible absorption spectra were recorded on an Agilent 8453 spectrophotometer.

Anhydrous acetonitrile (MeCN) was distilled from phosphorus pentoxide ( $\text{P}_2\text{O}_5$ ) to use. Anhydrous tetrahydrofuran (THF) was distilled from sodium and benzophenone to use. Anhydrous dichloromethane (DCM) was distilled from calcium hydride ( $\text{CaH}_2$ ) to use.  $\alpha$ -Aryldiazoacetates were prepared according to literature reported procedure<sup>[1]</sup> that will be described in detail later. The other materials obtained from commercial suppliers were used directly without further purification.

Reactions were monitored by thin layer chromatography (TLC) using pre-coated silica gel plates (GF254). Flash column chromatography was performed on silica gel 60 (particle size 200–400 mesh ASTM, purchased from Liangchen, China) and eluted with petroleum ether /ethylacetate. The LED blue lamps employed in this work were bought from Wuhan Jiushang Technology Co. LTD:  $\lambda_{\text{max}} = 453 \text{ nm}$  (415–510 nm); Power (6 W). Features of Reaction Vessel: 10 mL Pyrex glass tube. The distance from the light source to the irradiation vessel is about 1.5 cm. The temperature is controlled by a fan (**Figure S1**).

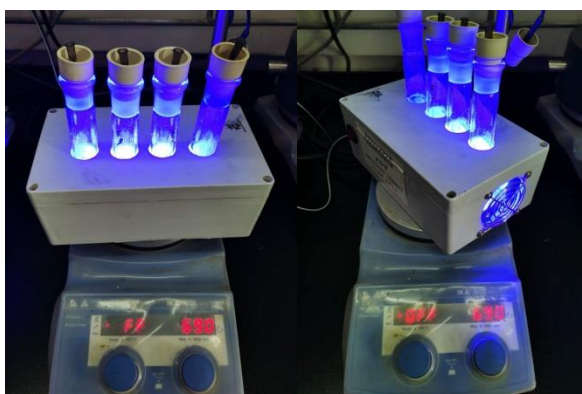

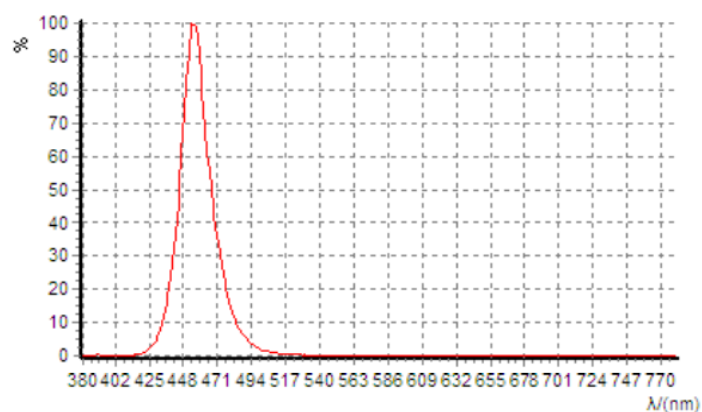

**Figure S1.** Setup of Photocatalytic Reaction and Light Characteristics

## 2. UV-Vis Absorption Spectra

The UV-visible absorption spectra of methyl  $\alpha$ -phenyldiazoacetate (**1**), 2-pyridone (**2**) and their mixture were measured in dichloromethane, showing that **1** has significant absorption in visible light region but **2** does not, and there is no ground state interaction between them (**Figure S2**).

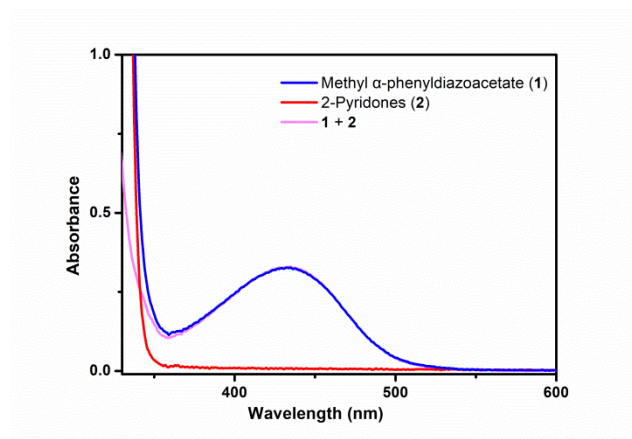

**Figure S2.** UV-Vis absorption spectra in  $\text{CH}_2\text{Cl}_2$  (0.05 M).

## 3. NMR Studies Whether There Are Hydrogen-Bond Interactions

We measured  $^1\text{H}$  and  $^{13}\text{C}$  NMR spectra of a 0.1 M solution of a 1:1 mixture of **1** and **2** in  $\text{CDCl}_3$ . No significant chemical shift perturbation for both the active hydrogen of **2** and the carbonyl carbon of **1** referring to the  $^1\text{H}$  NMR spectrum of a 0.1 M solution of **2** in  $\text{CDCl}_3$  and the  $^{13}\text{C}$  NMR spectrum of a 0.1 M solution of **1** in  $\text{CDCl}_3$  (**Figure S3**). These results can rule out the ground-state hydrogen-bond interaction between **1** and **2**.

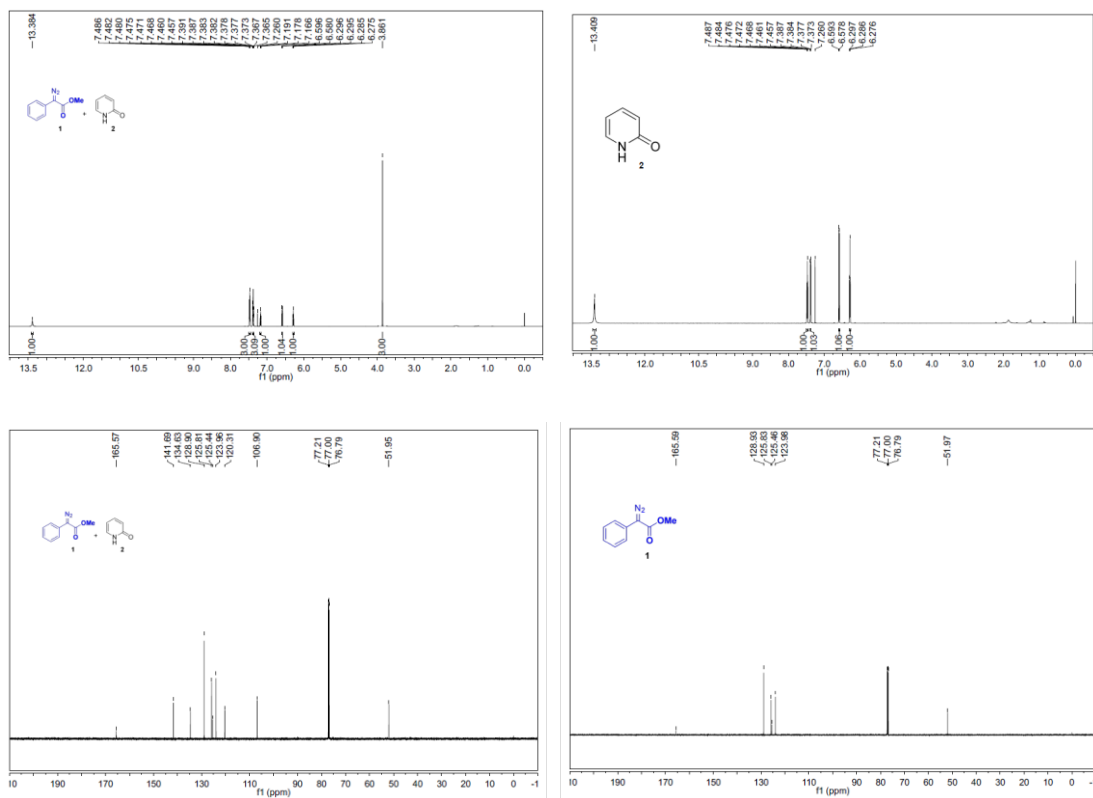

Figure S3. NMR studies in  $\text{CDCl}_3$  (0.1 M).

#### 4. General Procedure for Preparation of Substrates

##### 1) General procedure for preparation of $\alpha$ -aryldiazoesters – GP 1<sup>[1]</sup>

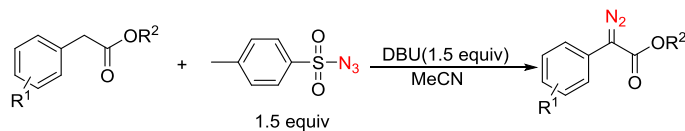

To a mixture of ester (10 mmol) and tosyl azide (2.96 g, 15 mmol, 1.5 equiv) in anhydrous MeCN (15 mL), 1,8-diazabicyclo[5.4.0]undec-7-ene (DBU) (2.28 g, 15 mmol, 1.5 equiv) was added. The reaction mixture was stirred at room temperature for overnight. Upon complete consumption of the starting materials, the reaction mixture was quenched with saturated aqueous solution of  $\text{NH}_4\text{Cl}$  (5 mL), extracted with  $\text{CH}_2\text{Cl}_2$  ( $3 \times 30$  mL), washed with brine ( $3 \times 10$  mL), dried over  $\text{MgSO}_4$ , and concentrated under reduced pressure. The residue was purified by flash chromatography (hexane/EtOAc, 9:1) to afford the  $\alpha$ -diazoester.

All the  $\alpha$ -aryldiazoacetates used in this work are reported products.<sup>[1-10]</sup>

##### 2) General procedure for preparation of deuterated 2-hydroxypyridine



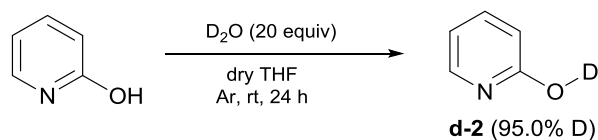

2-Hydroxypyridine (0.29 g, 3 mmol), deuterium oxide (1.20 g, 60 mmol, 20 equiv, 99.9% D) and dry THF (5 mL) were added into a 25 mL Pyrex glass tube. Stirred at room temperature under an argon atmosphere for 24 hours, drain the solvent to obtain deuterated 2-hydroxypyridine **d-2** (95.0% D).

## 5. Optimization of Reaction Conditions

**Table S1.** Optimization of the reaction conditions<sup>a</sup>

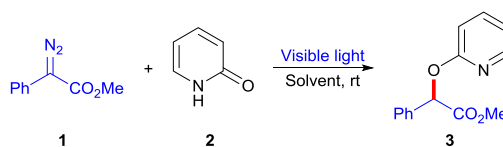

| Entry    | Light source        | Solvent           | Ratio of <b>1</b> to <b>2</b> | Yield <sup>b</sup> (%) |
|----------|---------------------|-------------------|-------------------------------|------------------------|
| 1        | 3 W blue LED        | DCM               | 1:2                           | 35                     |
| <b>2</b> | <b>6 W blue LED</b> | <b>DCM</b>        | <b>1:2</b>                    | <b>72</b>              |
| 3        | 6 W green LED       | DCM               | 1:2                           | 37                     |
| 4        | 6 W white LED       | DCM               | 1:2                           | 45                     |
| 5        | 15 W blue LED       | DCM               | 1:2                           | 44                     |
| 6        | 15 W green LED      | DCM               | 1:2                           | 34                     |
| 7        | 15 W white LED      | DCM               | 1:2                           | 38                     |
| 8        | 32 W CFL            | DCM               | 1:2                           | 35                     |
| 9        | In dark             | DCM               | 1:2                           | 0                      |
| 10       | 6 W blue LED        | CHCl <sub>3</sub> | 1:2                           | 30                     |
| 11       | 6 W blue LED        | DCE               | 1:2                           | 26                     |
| 12       | 6 W blue LED        | MeCN              | 1:2                           | 24                     |
| 13       | 6 W blue LED        | Hexane            | 1:2                           | 38                     |
| 14       | 6 W blue LED        | Toluene           | 1:2                           | 45                     |
| 15       | 6 W blue LED        | 1,4-Dioxane       | 1:2                           | trace                  |

|    |              |         |       |       |
|----|--------------|---------|-------|-------|
| 16 | 6 W blue LED | THF     | 1:2   | trace |
| 17 | 6 W blue LED | Acetone | 1:2   | 20    |
| 18 | 6 W blue LED | EtOAc   | 1:2   | 13    |
| 19 | 6 W blue LED | MeOH    | 1:2   | 0     |
| 20 | 6 W blue LED | EtOH    | 1:2   | 0     |
| 21 | 6 W blue LED | DCM     | 1:1   | 40    |
| 22 | 6 W blue LED | DCM     | 1:1.5 | 53    |
| 23 | 6 W blue LED | DCM     | 1:2   | 72    |
| 24 | 6 W blue LED | DCM     | 1:2.5 | 66    |
| 25 | 6 W blue LED | DCM     | 1.5:1 | 60    |
| 26 | 6 W blue LED | DCM     | 2:1   | 69    |
| 27 | 6 W blue LED | DCM     | 3:1   | 63    |

<sup>a</sup>Reaction conditions: **1** (0.3 mmol), **2** (0.6 mmol, 2 equiv), solvent (3 mL), under air (use the small needle of the syringe to keep it connected to air), rt, 6 h. <sup>b</sup>Isolated yields. N.R. = No reaction occurred.

## 6. General Procedure for the *O*-Alkylation of 2-Pyridones

$\alpha$ -Diazoacetate (0.3 mmol), 2-pyridone (0.6 mmol, 2.0 equiv) and DCM (3 mL) were added into a 10 mL Pyrex glass tube. The reaction mixture was continually stirred under 6 W blue LED irradiation at room temperature until  $\alpha$ -diazoacetate was consumed completely (monitored by TLC). The reaction solution was quenched with saturated aq. NaCl (3 mL) and extracted with EtOAc (3  $\times$  5 mL). The combined organic phase was dried over anhydrous Na<sub>2</sub>SO<sub>4</sub>, filtrated and concentrated under reduced pressure. The crude product was purified by column chromatography on silica gel (PE : EtOAc = 12:1) to afford the pure product.

## 7. Characterization Data of Products

### 1) Methyl 2-phenyl-2-(pyridin-2-yloxy)acetate (**3**)<sup>[11]</sup>

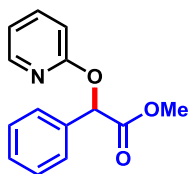

Prepared according to the general procedure from methyl 2-diazo-2-phenylacetate (52.9 mg, 0.3 mmol) and 2-pyridone (57.1 mg, 0.6 mmol, 2.0 equiv). Purified by column chromatography on silica gel (PE : EtOAc = 12:1) to afford the pure product **3**.

Colorless oil; yield: 52.5 mg (72%).

$^1\text{H}$  NMR (600 MHz,  $\text{CDCl}_3$ ):  $\delta$  = 8.13 (dd,  $J$  = 5.1, 0.9 Hz, 1H), 7.63–7.60 (m, 3H), 7.43–7.38 (m, 3H), 6.95–6.90 (m, 2H), 6.25 (s, 1H), 3.72 (s, 3H).

$^{13}\text{C}$  NMR (150 MHz,  $\text{CDCl}_3$ ):  $\delta$  = 170.8, 162.3, 146.5, 138.8, 135.1, 128.9, 128.6, 127.6, 117.5, 111.3, 75.5, 52.3.

HRMS (ESI):  $m/z$   $[\text{M}+\text{H}]^+$  calcd for  $\text{C}_{14}\text{H}_{14}\text{NO}_3^+$ : 244.0968; found: 244.0971.

## 2) Methyl 2-(pyridin-2-yloxy)-2-(*o*-tolyl)acetate (**4**)<sup>[12]</sup>

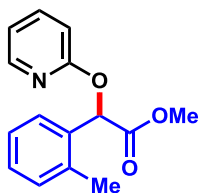

Prepared according to the general procedure from methyl 2-diazo-2-(*o*-tolyl)acetate (57.1 mg, 0.3 mmol) and 2-pyridone (57.1 mg, 0.6 mmol, 2.0 equiv). Purified by column chromatography on silica gel (PE : EtOAc = 12:1) to afford the pure product **4**.

Colorless oil; yield: 53.3 mg (69%).

$^1\text{H}$  NMR (600 MHz,  $\text{CDCl}_3$ ):  $\delta$  = 8.14 (d,  $J$  = 5.4 Hz, 1H), 7.61–7.58 (m, 2H), 7.29–7.22 (m, 3H), 6.90 (t,  $J$  = 6.3 Hz, 2H), 6.57 (s, 1H), 3.73 (s, 3H), 2.53 (s, 3H).

$^{13}\text{C}$  NMR (150 MHz,  $\text{CDCl}_3$ ):  $\delta$  = 171.0, 162.5, 146.6, 138.8, 137.0, 133.8, 130.7, 128.8, 128.0, 126.3, 117.5, 111.3, 72.5, 52.2, 19.4.

HRMS (ESI):  $m/z$   $[\text{M}+\text{H}]^+$  calcd for  $\text{C}_{15}\text{H}_{16}\text{NO}_3^+$ : 258.1125; found: 258.1128.

## 3) Methyl 2-(2-chlorophenyl)-2-(pyridin-2-yloxy)acetate (**5**)

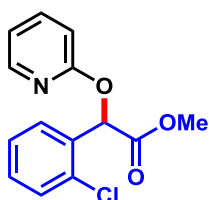

Prepared according to the general procedure from methyl 2-(2-chlorophenyl)-2-diazoacetate (63.2 mg, 0.3 mmol) and 2-pyridone (57.1 mg, 0.6 mmol, 2.0 equiv). Purified by column chromatography on

silica gel (PE : EtOAc = 12:1) to afford the pure product **5**.

Colorless oil; yield: 66.6 mg (80%).

$^1\text{H}$  NMR (600 MHz,  $\text{CDCl}_3$ ):  $\delta$  = 8.15–8.13 (m, 1H), 7.67–7.65 (m, 1H), 7.62–7.59 (m, 1H), 7.45–7.43 (m, 1H), 7.33–7.30 (m, 2H), 6.92–6.89 (m, 2H), 6.81 (s, 1H), 3.75 (s, 3H).

$^{13}\text{C}$  NMR (150 MHz,  $\text{CDCl}_3$ ):  $\delta$  = 170.3, 162.1, 146.6, 138.9, 134.1, 133.3, 130.1, 129.8, 129.5, 127.1, 117.7, 111.1, 71.9, 52.4.

HRMS (ESI):  $m/z$   $[\text{M}+\text{H}]^+$  calcd for  $\text{C}_{14}\text{H}_{13}\text{ClNO}_3^+$ : 278.0578; found: 278.0582.

#### 4) Methyl 2-(2-bromophenyl)-2-(pyridin-2-yloxy)acetate (**6**)<sup>[12]</sup>

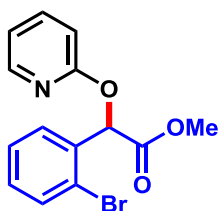

Prepared according to the general procedure from methyl 2-(2-bromophenyl)-2-diazoacetate (76.5 mg, 0.3 mmol) and 2-pyridone (57.1 mg, 0.6 mmol, 2.0 equiv). Purified by column chromatography on silica gel (PE : EtOAc = 12:1) to afford the pure product **6**.

Colorless oil; yield: 76.4 mg (79%).

$^1\text{H}$  NMR (600 MHz,  $\text{CDCl}_3$ ):  $\delta$  = 8.15–8.13 (m, 1H), 7.65–7.59 (m, 3H), 7.38–7.35 (m, 1H), 7.25–7.22 (m, 1H), 6.93–6.88 (m, 2H), 6.78 (s, 1H), 3.75 (s, 3H).

$^{13}\text{C}$  NMR (150 MHz,  $\text{CDCl}_3$ ):  $\delta$  = 170.3, 162.1, 146.6, 138.9, 135.0, 133.1, 130.4, 129.6, 127.8, 124.3, 117.7, 111.1, 74.3, 52.4.

HRMS (ESI):  $m/z$   $[\text{M}+\text{H}]^+$  calcd for  $\text{C}_{14}\text{H}_{13}\text{BrNO}_3^+$ : 322.0073; found: 322.0074.

#### 5) Methyl 2-(2-methoxyphenyl)-2-(pyridin-2-yloxy)acetate (**7**)

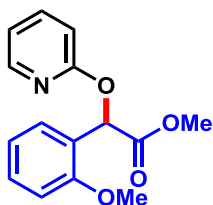

Prepared according to the general procedure from methyl 2-diazo-2-(2-methoxyphenyl)acetate (61.2 mg, 0.3 mmol) and 2-pyridone (57.1 mg, 0.6 mmol, 2.0 equiv). Purified by column chromatography on silica gel (PE : EtOAc = 12:1) to afford the pure product **7**.

Colorless oil; yield: 58.2 mg (71%).

$^1\text{H}$  NMR (600 MHz,  $\text{CDCl}_3$ ):  $\delta$  = 8.15–8.14 (m, 1H), 7.60–7.55 (m, 2H), 7.37–7.34 (m, 1H), 7.01 (td,  $J$  = 7.4, 0.8 Hz, 1H), 6.95 (d,  $J$  = 8.4 Hz, 1H), 6.91–6.87 (m, 2H), 6.77 (s, 1H), 3.87 (s, 3H), 3.73 (s, 3H).

$^{13}\text{C}$  NMR (150 MHz,  $\text{CDCl}_3$ ):  $\delta$  = 171.2, 162.6, 157.3, 146.6, 138.7, 130.3, 129.3, 123.8, 120.8, 117.3, 111.3, 111.2, 69.4, 55.8, 52.2.

HRMS (ESI):  $m/z$   $[\text{M}+\text{H}]^+$  calcd for  $\text{C}_{15}\text{H}_{16}\text{NO}_4^+$ : 274.1074; found: 274.1076.

#### 6) Methyl 2-(3-chlorophenyl)-2-(pyridin-2-yloxy)acetate (8)

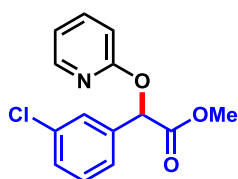

Prepared according to the general procedure from methyl 2-(3-chlorophenyl)-2-diazoacetate (63.2 mg, 0.3 mmol) and 2-pyridone (57.1 mg, 0.6 mmol, 2.0 equiv). Purified by column chromatography on silica gel (PE : EtOAc = 12:1) to afford the pure product **8**.

Colorless oil; yield: 67.5 mg (81%).

$^1\text{H}$  NMR (600 MHz,  $\text{CDCl}_3$ ):  $\delta$  = 8.12–8.11 (m, 1H), 7.65–7.62 (m, 2H), 7.50 (dt,  $J$  = 6.8, 1.8 Hz, 1H), 7.34 (dd,  $J$  = 5.4, 3.7 Hz, 2H), 6.95–6.91 (m, 2H), 6.22 (s, 1H), 3.73 (s, 3H).

$^{13}\text{C}$  NMR (150 MHz,  $\text{CDCl}_3$ ):  $\delta$  = 170.3, 162.0, 146.6, 139.0, 137.0, 134.6, 129.9, 129.0, 127.7, 125.7, 117.8, 111.3, 74.7, 52.5.

HRMS (ESI):  $m/z$   $[\text{M}+\text{H}]^+$  calcd for  $\text{C}_{14}\text{H}_{13}\text{ClNO}_3^+$ : 278.0578; found: 278.0582.

#### 7) Methyl 2-(3-fluorophenyl)-2-(pyridin-2-yloxy)acetate (9)

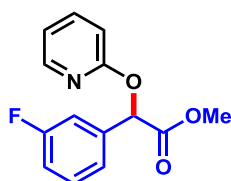

Prepared according to the general procedure from methyl 2-diazo-2-(3-fluorophenyl)acetate (58.3 mg, 0.3 mmol) and 2-pyridone (57.1 mg, 0.6 mmol, 2.0 equiv). Purified by column chromatography on silica gel (PE : EtOAc = 12:1) to afford the pure product **9**.

Light yellow oil; yield: 58 mg (74%).

$^1\text{H}$  NMR (600 MHz,  $\text{CDCl}_3$ ):  $\delta$  = 8.13–8.11 (m, 1H), 7.64–7.61(m, 1H), 7.40–7.35 (m, 3H), 7.09–7.05 (m, 1H), 6.96–6.90 (m, 2H), 6.24 (s, 1H), 3.73 (s, 3H).

$^{13}\text{C}$  NMR (150 MHz,  $\text{CDCl}_3$ ):  $\delta$  = 170.3, 163.6, 162.0 (d,  $J$  = 5.25 Hz), 146.6, 139.0, 137.4 (d,  $J$  = 7.55 Hz), 130.2(d,  $J$  = 8.15 Hz), 123.2 (d,  $J$  = 3.0 Hz), 117.7, 115.8 (d,  $J$  = 21.0 Hz) 114.6 (d,  $J$  = 22.6 Hz), 111.2, 74.8, 52.5.

$^{19}\text{F}$  NMR (376 MHz,  $\text{CDCl}_3$ ):  $\delta$  = -117.86—-117.92 (m).

HRMS (ESI):  $m/z$   $[\text{M}+\text{H}]^+$  calcd for  $\text{C}_{14}\text{H}_{13}\text{FNO}_3^+$ : 262.0874; found: 262.0875.

### 8) Methyl 2-(4-bromophenyl)-2-(pyridin-2-yloxy)acetate (10)

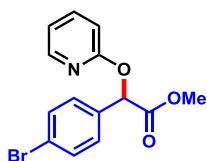

Prepared according to the general procedure from methyl 2-(4-bromophenyl)-2-diazoacetate (76.5 mg, 0.3 mmol) and 2-pyridone (57.1 mg, 0.6 mmol, 2.0 equiv). Purified by column chromatography on silica gel (PE : EtOAc = 12:1) to afford the pure product **10**.

Colorless oil; yield: 79.3 mg (82%).

$^1\text{H}$  NMR (600 MHz,  $\text{CDCl}_3$ ):  $\delta$  = 8.14–8.09 (m, 1H), 7.64–7.61 (m, 1H), 7.54–7.53 (m, 2H), 7.50–7.49 (m, 2H), 6.92 (dd,  $J$  = 10.5, 4.5 Hz, 2H), 6.20 (s, 1H), 3.72 (s, 3H).

$^{13}\text{C}$  NMR (150 MHz,  $\text{CDCl}_3$ ):  $\delta$  = 170.4, 162.0, 146.6, 139.0, 134.2, 131.9, 129.2, 123.0, 117.7, 111.2, 74.8, 52.5.

HRMS (ESI):  $m/z$   $[\text{M}+\text{H}]^+$  calcd for  $\text{C}_{14}\text{H}_{13}\text{BrNO}_3^+$ : 322.0073; found: 322.0074.

### 9) Methyl 2-(4-chlorophenyl)-2-(pyridin-2-yloxy)acetate (11)

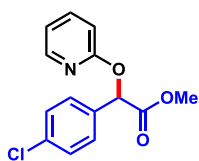

Prepared according to the general procedure from methyl 2-(4-chlorophenyl)-2-diazoacetate (63.2 mg, 0.3 mmol) and 2-pyridone (57.1 mg, 0.6 mmol, 2.0 equiv). Purified by column chromatography on silica gel (PE : EtOAc = 12:1) to afford the pure product **11**.

Colorless oil; yield: 70 mg (84%).

$^1\text{H}$  NMR (600 MHz,  $\text{CDCl}_3$ ):  $\delta$  = 8.13–8.10 (m, 1H), 7.63–7.60 (m, 1H), 7.56 (d,  $J$  = 8.4 Hz, 2H), 7.38 (d,  $J$  = 8.4 Hz, 2H), 6.93–6.90 (m, 2H), 6.24 (s, 1H), 3.72 (s, 3H).

$^{13}\text{C}$  NMR (150 MHz,  $\text{CDCl}_3$ ):  $\delta$  = 170.4, 162.1, 146.6, 139.0, 134.9, 133.8, 128.9, 128.8, 117.7, 111.2, 74.8, 52.4.

HRMS (ESI):  $m/z$   $[\text{M}+\text{H}]^+$  calcd for  $\text{C}_{14}\text{H}_{13}\text{ClNO}_3^+$ : 278.0578; found: 278.0583.

#### 10) Methyl 2-(pyridin-2-yloxy)-2-(4-(trifluoromethyl)phenyl)acetate (12)

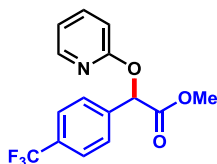

Prepared according to the general procedure from methyl 2-diazo-2-(4-(trifluoromethyl)phenyl)acetate (73.3 mg, 0.3 mmol) and 2-pyridone (57.1 mg, 0.6 mmol, 2.0 equiv). Purified by column chromatography on silica gel (PE : EtOAc = 12:1) to afford the pure product **12**.

Colorless oil; yield: 71.0 mg (76%).

$^1\text{H}$  NMR (600 MHz,  $\text{CDCl}_3$ ):  $\delta$  = 8.12 (d,  $J$  = 4.8 Hz, 1H), 7.76 (d,  $J$  = 8.4 Hz, 2H), 7.67–7.62 (m, 3H), 6.97–6.90 (m, 2H), 6.34 (s, 1H), 3.73 (s, 3H).

$^{13}\text{C}$  NMR (150 MHz,  $\text{CDCl}_3$ ):  $\delta$  = 170.1, 162.0, 146.6, 139.2, 139.0, 130.9, 128.4, 127.9, 125.6 (q,  $J$  = 3.75 Hz), 124.9, 123.1, 117.8, 111.2, 74.8, 52.5.

$^{19}\text{F}$  NMR (376 MHz,  $\text{CDCl}_3$ ):  $\delta$  = -63.12 (s).

HRMS (ESI):  $m/z$   $[\text{M}+\text{H}]^+$  calcd for  $\text{C}_{15}\text{H}_{13}\text{F}_3\text{NO}_3^+$ : 312.0842; found: 312.0843.

#### 11) Methyl 2-(pyridin-2-yloxy)-2-(*p*-tolyl)acetate (13)

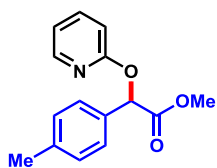

Prepared according to the general procedure from methyl 2-diazo-2-(*p*-tolyl)acetate (57.1 mg, 0.3 mmol) and 2-pyridone (57.1 mg, 0.6 mmol, 2.0 equiv). Purified by column chromatography on silica gel (PE : EtOAc = 12:1) to afford the pure product **13**.

Colorless oil; yield: 47.9 mg (62%).

$^1\text{H}$  NMR (600 MHz,  $\text{CDCl}_3$ ):  $\delta$  = 8.13–8.12 (m, 1H), 7.62–7.59 (m, 1H), 7.50 (d,  $J$  = 7.8 Hz, 2H), 7.22 (d,  $J$  = 7.8 Hz, 2H), 6.93–6.89 (m, 2H), 6.20 (s, 1H), 3.72 (s, 3H), 2.37 (s, 3H).

$^{13}\text{C}$  NMR (150 MHz,  $\text{CDCl}_3$ ):  $\delta$  = 170.9, 162.4, 146.6, 138.8, 132.1, 129.4, 127.6, 117.5, 111.3, 75.4, 52.3, 21.2.

HRMS (ESI):  $m/z$   $[\text{M}+\text{H}]^+$  calcd for  $\text{C}_{15}\text{H}_{16}\text{NO}_3^+$ : 258.1125; found: 258.1127.

### 12) Methyl 2-(4-fluorophenyl)-2-(pyridin-2-yloxy)acetate (14)

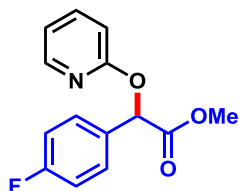

Prepared according to the general procedure from methyl 2-diazo-2-(4-fluorophenyl)acetate (58.3 mg, 0.3 mmol) and 2-pyridone (57.1 mg, 0.6 mmol, 2.0 equiv). Purified by column chromatography on silica gel (PE : EtOAc = 12:1) to afford the pure product **14**.

Light yellow oil; yield: 61.1 mg (78%).

$^1\text{H}$  NMR (600 MHz,  $\text{CDCl}_3$ ):  $\delta$  = 8.12 (dd,  $J$  = 4.8, 0.6 Hz, 1H), 7.63–7.58 (m, 3H), 7.09 (t,  $J$  = 8.7 Hz, 2H), 6.92 (dd,  $J$  = 10.5, 4.5 Hz, 2H), 6.22 (s, 1H), 3.72 (s, 3H).

$^{13}\text{C}$  NMR (150 MHz,  $\text{CDCl}_3$ ):  $\delta$  = 170.7, 163.8, 162.2 (d,  $J$  = 10.95 Hz), 146.6, 138.9, 131.0 (d,  $J$  = 3.3 Hz), 129.5 (d,  $J$  = 8.25 Hz), 117.7, 115.6 (d,  $J$  = 21.45 Hz), 111.2, 74.8, 52.4.

$^{19}\text{F}$  NMR (376 MHz,  $\text{CDCl}_3$ ):  $\delta$  = -118.25—-118.33 (m).

HRMS (ESI):  $m/z$   $[\text{M}+\text{H}]^+$  calcd for  $\text{C}_{14}\text{H}_{13}\text{FNO}_3^+$ : 262.0874; found: 262.0875.

### 13) Methyl 2-(2,5-difluorophenyl)-2-(pyridin-2-yloxy)acetate (15)

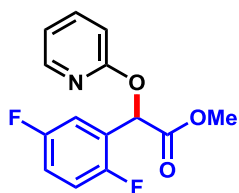

Prepared according to the general procedure from methyl 2-diazo-2-(2,5-difluorophenyl)acetate (63.6 mg, 0.3 mmol) and 2-pyridone (57.1 mg, 0.6 mmol, 2.0 equiv). Purified by column chromatography on silica gel (PE : EtOAc = 12:1) to afford the pure product **15**.

Light yellow oil; yield: 67 mg (80%).

$^1\text{H}$  NMR (600 MHz,  $\text{CDCl}_3$ ):  $\delta$  = 8.12 (d,  $J$  = 5.4 Hz, 1H), 7.62 (t,  $J$  = 7.8 Hz, 1H), 7.37–7.34 (m, 1H), 7.09–7.03 (m, 2H), 6.91 (dd,  $J$  = 12.3, 6.9 Hz, 2H), 6.64 (s, 1H), 3.75 (s, 3H).



$^{13}\text{C}$  NMR (150 MHz,  $\text{CDCl}_3$ ):  $\delta$  = 169.7, 161.9, 159.5, 157.9 (d,  $J$  = 2.55 Hz), 155.61, 146.6, 139.0, 124.5 (dd,  $J$  = 16.4, 7.9 Hz), 117.0 (ddd,  $J$  = 44.3, 24.4, 8.5 Hz), 116.0 (d,  $J$  = 3.4 Hz), 115.8 (d,  $J$  = 3.4 Hz), 111.2, 68.5 (d,  $J$  = 2.8 Hz), 52.5.

$^{19}\text{F}$  NMR (376 MHz,  $\text{CDCl}_3$ ):  $\delta$  = -118.22—-118.28 (m), -123.245—-123.34 (m).

HRMS (ESI):  $m/z$   $[\text{M}+\text{H}]^+$  calcd for  $\text{C}_{14}\text{H}_{12}\text{F}_2\text{NO}_3^+$ : 280.0780; found: 280.0781.

#### 14) Methyl 2-(3,4-dimethoxyphenyl)-2-(pyridin-2-yloxy)acetate (16)

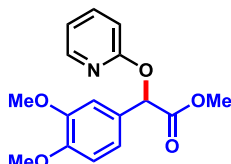

Prepared according to the general procedure from methyl 2-diazo-2-(3,4-dimethoxyphenyl)acetate (70.9 mg, 0.3 mmol) and 2-pyridone (57.1 mg, 0.6 mmol, 2.0 equiv). Purified by column chromatography on silica gel (PE : EtOAc = 12:1) to afford the pure product **16**.

Colorless oil; yield: 53.7 mg (59%).

$^1\text{H}$  NMR (600 MHz,  $\text{CDCl}_3$ ):  $\delta$  = 8.13–8.12 (m, 1H), 7.63–7.60 (m, 1H), 7.14 (dd,  $J$  = 10.5, 2.1 Hz, 2H), 6.93–6.88 (m, 3H), 6.15 (s, 1H), 3.92 (s, 3H), 3.89 (s, 3H), 3.72 (s, 3H).

$^{13}\text{C}$  NMR (150 MHz,  $\text{CDCl}_3$ ):  $\delta$  = 171.0, 162.3, 149.6, 149.2, 146.6, 138.9, 127.5, 120.5, 117.5, 111.3, 111.1, 110.6, 75.4, 56.0, 55.9, 52.4.

HRMS (ESI):  $m/z$   $[\text{M}+\text{Na}]^+$  calcd for  $\text{C}_{16}\text{H}_{17}\text{NaO}_5^+$ : 326.0999; found: 326.1002.

#### 15) ethyl 2-phenyl-2-(pyridin-2-yloxy)acetate (17)

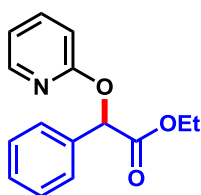

Prepared according to the general procedure from ethyl 2-diazo-2-phenylacetate (57.1 mg, 0.3 mmol) and 2-pyridone (57.1 mg, 0.6 mmol, 2.0 equiv). Purified by column chromatography on silica gel (PE : EtOAc = 12:1) to afford the pure product **17**.

Colorless oil; yield: 57.9 mg (75%).

$^1\text{H}$  NMR (400 MHz,  $\text{CDCl}_3$ ):  $\delta$  = 8.14–8.12 (m, 1H), 7.65–7.59 (m, 3H), 7.42–7.38 (m, 3H), 6.95–6.89 (m, 2H), 6.21 (s, 1H), 4.24–4.14 (m, 2H), 1.19 (t,  $J$  = 7.2 Hz, 3H).

$^{13}\text{C}$  NMR (150 MHz,  $\text{CDCl}_3$ ):  $\delta$  = 170.3, 162.3, 146.5, 138.8, 135.2, 129.1, 128.8, 128.6, 127.6, 127.1, 117.5, 111.2, 75.7, 61.2, 13.9.

HRMS (ESI):  $m/z$   $[\text{M}+\text{H}]^+$  calcd for  $\text{C}_{15}\text{H}_{16}\text{NO}_3^+$ : 258.1125; found: 258.1128.

#### 16) Isopropyl 2-phenyl-2-(pyridin-2-yloxy)acetate (18)

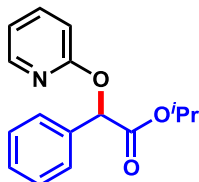

Prepared according to the general procedure from isopropyl 2-diazo-2-phenylacetate (61.3 mg, 0.3 mmol) and 2-pyridone (57.1 mg, 0.6 mmol, 2.0 equiv). Purified by column chromatography on silica gel (PE : EtOAc = 12:1) to afford the pure product **18**.

Colorless oil; yield: 62.7 mg (77%).

$^1\text{H}$  NMR (600 MHz,  $\text{CDCl}_3$ ):  $\delta$  = 8.12 (d,  $J$  = 5.4 Hz, 1H), 7.63–7.59 (m, 3H), 7.41–7.36 (m, 3H), 6.93–6.88 (m, 2H), 6.17 (s, 1H), 5.07–5.01 (m, 1H), 1.27 (d,  $J$  = 6.6 Hz, 3H), 1.07 (d,  $J$  = 6.0 Hz, 3H).

$^{13}\text{C}$  NMR (150 MHz,  $\text{CDCl}_3$ ):  $\delta$  = 169.8, 162.5, 146.4, 138.7, 135.4, 128.9, 128.7, 128.5, 128.0, 127.6, 117.4, 111.3, 76.0, 68.7, 21.6, 21.3.

HRMS (ESI):  $m/z$   $[\text{M}+\text{H}]^+$  calcd for  $\text{C}_{16}\text{H}_{18}\text{NO}_3^+$ : 272.1281; found: 272.1285.

#### 17) Butyl 2-phenyl-2-(pyridin-2-yloxy)acetate (19)

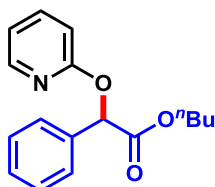

Prepared according to the general procedure from butyl 2-diazo-2-phenylacetate (65.5 mg, 0.3 mmol) and 2-pyridone (57.1 mg, 0.6 mmol, 2.0 equiv). Purified by column chromatography on silica gel (PE : EtOAc = 12:1) to afford the pure product **19**.

Colorless oil; yield: 66.8 mg (78%).

$^1\text{H}$  NMR (600 MHz,  $\text{CDCl}_3$ ):  $\delta$  = 8.12 (dd,  $J$  = 5.4, 1.8 Hz, 1H), 7.64–7.61 (m, 3H), 7.42–7.37 (m, 3H), 6.96–6.89 (m, 2H), 6.22 (s, 1H), 4.17–4.10 (m, 2H), 1.59–1.50 (m, 2H), 1.29–1.20 (m, 2H), 0.84 (t,  $J$  = 7.2 Hz, 3H).

$^{13}\text{C}$  NMR (150 MHz,  $\text{CDCl}_3$ ):  $\delta$  = 170.4, 162.4, 146.5, 138.8, 135.2, 128.8, 128.6, 127.6, 117.5, 111.2, 75.7, 65.0, 30.4, 18.8, 13.5.

HRMS (ESI):  $m/z$   $[\text{M}+\text{H}]^+$  calcd for  $\text{C}_{17}\text{H}_{20}\text{NO}_3^+$ : 286.1438; found: 286.1436.

### 18) *tert*-Butyl 2-phenyl-2-(pyridin-2-yloxy)acetate (20)

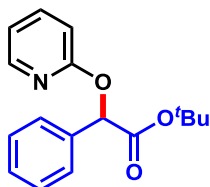

Prepared according to the general procedure from *tert*-butyl 2-diazo-2-phenylacetate (65.5 mg, 0.3 mmol) and 2-pyridone (57.1 mg, 0.6 mmol, 2.0 equiv). Purified by column chromatography on silica gel (PE : EtOAc = 12:1) to afford the pure product **20**.

Colorless oil; yield: 55.6 mg (65%);

$^1\text{H}$  NMR (600 MHz,  $\text{CDCl}_3$ ):  $\delta$  = 8.15–8.10 (m, 1H), 7.60 (dd,  $J$  = 10.5, 4.5 Hz, 3H), 7.42–7.35 (m, 3H), 6.93–6.88 (m, 2H), 6.09 (s, 1H), 1.38 (s, 9H).

$^{13}\text{C}$  NMR (150 MHz,  $\text{CDCl}_3$ ):  $\delta$  = 169.3, 162.5, 146.4, 138.7, 135.7, 128.6, 128.5, 127.6, 117.4, 111.3, 81.7, 76.1, 27.8.

HRMS (ESI):  $m/z$   $[\text{M}+\text{Na}]^+$  calcd for  $\text{C}_{17}\text{H}_{19}\text{NNaO}_3^+$ : 308.1257; found: 308.1255.

### 19) Isopentyl 2-phenyl-2-(pyridin-2-yloxy)acetate (21)

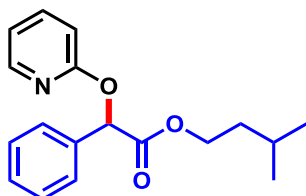

Prepared according to the general procedure from isopentyl 2-diazo-2-phenylacetate (69.7 mg, 0.3 mmol) and 2-pyridone (57.1 mg, 0.6 mmol, 2.0 equiv). Purified by column chromatography on silica gel (PE : EtOAc = 12:1) to afford the pure product **21**.

Colorless oil; yield: 62.9 mg (70%).

$^1\text{H}$  NMR (600 MHz,  $\text{CDCl}_3$ ):  $\delta$  = 8.13–8.11 (m, 1H), 7.64–7.60 (m, 3H), 7.42–7.36 (m, 3H), 6.94–6.89 (m, 2H), 6.21 (s, 1H), 4.20–4.13 (m, 2H), 1.55–1.42 (m, 3H), 0.83 (dd,  $J$  = 18.6, 6.6 Hz, 6H).

$^{13}\text{C}$  NMR (150 MHz,  $\text{CDCl}_3$ ):  $\delta$  = 170.4, 162.4, 146.5, 138.8, 135.2, 128.8, 128.6, 127.6, 117.5, 111.2, 75.7, 63.8, 37.1, 24.8, 22.3, 22.2.

HRMS (ESI):  $m/z$   $[M+H]^+$  calcd for  $C_{18}H_{22}NO_3^+$ : 300.1594; found: 300.1597.

### 20) 2-Methylallyl 2-phenyl-2-(pyridin-2-yloxy)acetate (22)

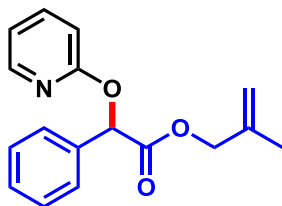

Prepared according to the general procedure from 2-methylallyl 2-diazo-2-phenylacetate (64.9 mg, 0.3 mmol) and 2-pyridone (57.1 mg, 0.6 mmol, 2.0 equiv). Purified by column chromatography on silica gel (PE : EtOAc = 12:1) to afford the pure product **22**.

Colorless oil; yield: 51.8 mg (61%).

$^1H$  NMR (600 MHz,  $CDCl_3$ ):  $\delta$  = 8.12 (dd,  $J$  = 5.1, 0.9 Hz, 1H), 7.65–7.60 (m, 3H), 7.42–7.36 (m, 3H), 6.94–6.89 (m, 2H), 6.28 (s, 1H), 4.86 (d,  $J$  = 18.6 Hz, 2H), 4.55 (d,  $J$  = 5.4 Hz, 2H), 1.61 (s, 3H).

$^{13}C$  NMR (150 MHz,  $CDCl_3$ ):  $\delta$  = 170.0, 162.4, 146.5, 139.6, 138.8, 135.3, 129.7, 128.8, 128.6, 127.7, 117.5, 113.0, 111.3, 75.7, 68.2, 19.1.

HRMS (ESI):  $m/z$   $[M+H]^+$  calcd for  $C_{17}H_{18}NO_3^+$ : 284.1281; found: 284.1284.

### 21) Octyl 2-phenyl-2-(pyridin-2-yloxy)acetate (23)

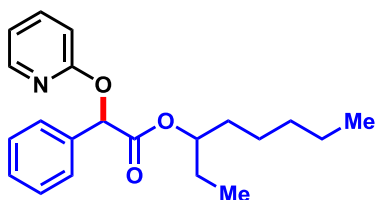

Prepared according to the general procedure from octan-3-yl 2-diazo-2-phenylacetate (82.3 mg, 0.3 mmol) and 2-pyridone (57.1 mg, 0.6 mmol, 2.0 equiv). Purified by column chromatography on silica gel (PE : EtOAc = 12:1) to afford the pure product **23**.

Colorless oil; yield: 69.3 mg (68%).

$^1H$  NMR (400 MHz,  $CDCl_3$ ):  $\delta$  = 8.13–8.09 (m, 1H), 7.64–7.59 (m, 3H), 7.42–7.36 (m, 3H), 6.95–6.88 (m, 2H), 6.15 (s, 1H), 4.98–4.87 (m, 1H), 1.46–1.23 (m, 8H), 1.07–1.00 (m, 4H), 0.93–0.81 (m, 4H).

$^{13}C$  NMR (150 MHz,  $CDCl_3$ ):  $\delta$  = 169.9, 162.6, 146.5, 138.7, 135.5, 128.7, 128.5, 127.6, 117.4, 111.3, 76.1, 72.0, 35.7, 31.6, 28.9, 24.8, 22.4, 19.9, 14.0.

HRMS (ESI):  $m/z$   $[M+H]^+$  calcd for  $C_{21}H_{28}NO_3^+$ : 342.2064; found: 342.2066.

### 22) Benzyl 2-phenyl-2-(pyridin-2-yloxy)acetate (24)

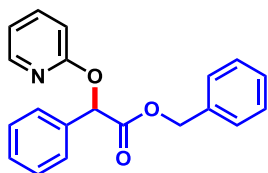

Prepared according to the general procedure from benzyl 2-diazo-2-phenylacetate (75.7 mg, 0.3 mmol) and 2-pyridone (57.1 mg, 0.6 mmol, 2.0 equiv). Purified by column chromatography on silica gel (PE : EtOAc = 12:1) to afford the pure product **24**.

Colorless oil; yield: 75.7 mg (79%).

$^1\text{H}$  NMR (600 MHz,  $\text{CDCl}_3$ ):  $\delta$  = 8.06 (d,  $J$  = 4.2 Hz, 1H), 7.63–7.59 (m, 3H), 7.41–7.37 (m, 3H), 7.28 (dd,  $J$  = 4.2, 1.2 Hz, 3H), 7.20–7.19 (m, 2H), 6.93–6.88 (m, 2H), 6.29 (s, 1H), 5.22 (d,  $J$  = 12.6 Hz, 1H), 5.13 (d,  $J$  = 12.6 Hz, 1H).

$^{13}\text{C}$  NMR (150 MHz,  $\text{CDCl}_3$ ):  $\delta$  = 170.2, 162.5, 146.6, 138.8, 135.8, 135.2, 128.8, 128.6, 128.3, 128.0, 127.8, 127.7, 117.5, 111.3, 75.9, 66.7.

HRMS (ESI):  $m/z$   $[\text{M}+\text{Na}]^+$  calcd for  $\text{C}_{20}\text{H}_{17}\text{NNaO}_3^+$ : 342.1101; found: 342.1103.

### 23) Phenethyl 2-phenyl-2-(pyridin-2-yloxy)acetate (25)

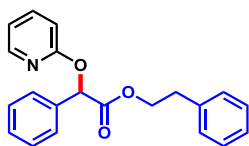

Prepared according to the general procedure from phenethyl 2-diazo-2-phenylacetate (79.9 mg, 0.3 mmol) and 2-pyridone (57.1 mg, 0.6 mmol, 2.0 equiv). Purified by column chromatography on silica gel (PE : EtOAc = 12:1) to afford the pure product **25**.

Colorless oil; yield: 74.0 mg (74%).

$^1\text{H}$  NMR (600 MHz,  $\text{CDCl}_3$ ):  $\delta$  = 8.10 (d,  $J$  = 1.8 Hz, 1H), 7.62–7.57 (m, 3H), 7.38–7.37 (m, 3H), 7.22–7.19 (m, 3H), 7.10 (d,  $J$  = 6.6 Hz, 2H), 6.93–6.90 (m, 2H), 6.24 (s, 1H), 4.36–4.34 (m, 2H), 2.93–2.84 (m, 2H).

$^{13}\text{C}$  NMR (150 MHz,  $\text{CDCl}_3$ ):  $\delta$  = 170.2, 162.5, 146.6, 138.8, 137.7, 135.3, 128.8, 128.7, 128.6, 128.4, 127.7, 126.4, 117.5, 111.3, 75.8, 65.6, 34.9.

HRMS (ESI):  $m/z$   $[\text{M}+\text{Na}]^+$  calcd for  $\text{C}_{21}\text{H}_{19}\text{NNaO}_3^+$ : 356.1257; found: 356.1260.

### 24) Cyclopentyl 2-phenyl-2-(pyridin-2-yloxy)acetate (26)

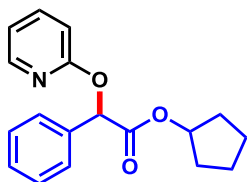

Prepared according to the general procedure from cyclopentyl 2-diazo-2-phenylacetate (69.1 mg, 0.3 mmol) and 2-pyridone (57.1 mg, 0.6 mmol, 2.0 equiv). Purified by column chromatography on silica gel (PE : EtOAc = 12:1) to afford the pure product **26**.

Colorless oil; yield: 73.1 mg (82%).

$^1\text{H}$  NMR (600 MHz,  $\text{CDCl}_3$ ):  $\delta$  = 8.12 (d,  $J$  = 3.6 Hz, 1H), 7.62–7.58 (m, 3H), 7.41–7.34 (m, 3H), 6.93–6.88 (m, 2H), 6.19 (s, 1H), 5.20 (s, 1H), 1.81–1.78 (m, 2H), 1.72–1.67 (m, 2H), 1.57–1.46 (m, 4H).

$^{13}\text{C}$  NMR (150 MHz,  $\text{CDCl}_3$ ):  $\delta$  = 169.9, 162.6, 146.5, 138.7, 135.5, 129.0, 128.6, 128.5, 128.1, 127.6, 117.4, 111.2, 78.1, 76.0, 32.4, 32.3, 23.6, 23.4.

HRMS (ESI):  $m/z$   $[\text{M}+\text{H}]^+$  calcd for  $\text{C}_{18}\text{H}_{20}\text{NO}_3^+$ : 298.1438; found: 298.1441.

#### 25) Cyclohexyl 2-phenyl-2-(pyridin-2-yloxy)acetate (**27**)

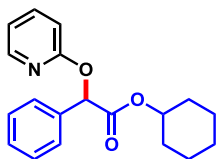

Prepared according to the general procedure from cyclohexyl 2-diazo-2-phenylacetate (73.3 mg, 0.3 mmol) and 2-pyridone (57.1 mg, 0.6 mmol, 2.0 equiv). Purified by column chromatography on silica gel (PE : EtOAc = 12:1) to afford the pure product **27**.

Colorless oil; yield: 70.1 mg (75%).

$^1\text{H}$  NMR (600 MHz,  $\text{CDCl}_3$ ):  $\delta$  = 8.12–8.11 (m, 1H), 7.64–7.59 (m, 3H), 7.40–7.36 (m, 3H), 6.94–6.89 (m, 2H), 6.18 (s, 1H), 4.83–4.79 (m, 1H), 1.82 (dd,  $J$  = 6.3, 4.5 Hz, 1H), 1.74–1.70 (m, 1H), 1.61 (d,  $J$  = 12.0 Hz, 1H), 1.54–1.46 (m, 3H), 1.26–1.23 (m, 4H).

$^{13}\text{C}$  NMR (150 MHz,  $\text{CDCl}_3$ ):  $\delta$  = 169.8, 162.4, 146.4, 138.7, 135.4, 128.7, 128.5, 127.6, 117.4, 111.2, 75.9, 73.3, 31.2, 30.9, 25.3, 23.4, 23.2.

HRMS (ESI):  $m/z$   $[\text{M}+\text{Na}]^+$  calcd for  $\text{C}_{19}\text{H}_{21}\text{NNaO}_3^+$ : 334.1414; found: 334.1412.

#### 26) (1S, 2R, 5S)-2-Isopropyl-5-methylcyclohexyl 2-phenyl-2-(pyridin-2-yloxy)acetate (**28**)



HRMS (ESI):  $m/z$   $[M+Na]^+$  calcd for  $C_{23}H_{27}NNaO_3^+$ : 388.1883; found: 388.1886.

### 28) Methyl 2-((3-fluoropyridin-2-yl)oxy)-2-phenylacetate (30)

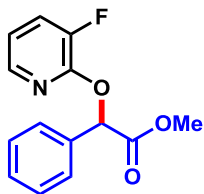

Prepared according to the general procedure from methyl 2-diazo-2-phenylacetate (52.9 mg, 0.3 mmol) and 3-fluoropyridin-2(1*H*)-one (67.9 mg, 0.6 mmol, 2.0 equiv). Purified by column chromatography on silica gel (PE : EtOAc = 12:1) to afford the pure product **30**.

Colorless oil; yield: 54.9 mg (70%).

$^1H$  NMR (600 MHz,  $CDCl_3$ ):  $\delta$  = 7.89 (dd,  $J$  = 5.1, 1.5 Hz, 1H), 7.64 (d,  $J$  = 6.6 Hz, 2H), 7.42–7.36 (m, 4H), 6.92–6.89 (m, 1H), 6.25 (s, 1H), 3.72 (s, 3H).

$^{13}C$  NMR (150 MHz,  $CDCl_3$ ):  $\delta$  = 170.2, 151.6, 148.1, 146.4, 141.0 (d,  $J$  = 6.4 Hz), 134.5, 129.1, 128.7, 127.6, 123.7 (d,  $J$  = 15.2 Hz), 117.9, 75.8, 52.5.

$^{19}F$  NMR (376 MHz,  $CDCl_3$ ):  $\delta$  = -138.63—-138.66 (m).

HRMS (ESI):  $m/z$   $[M+H]^+$  calcd for  $C_{14}H_{13}FNO_3^+$ : 262.0874; found: 262.0875.

### 29) Methyl 2-((3-bromopyridin-2-yl)oxy)-2-phenylacetate (31)

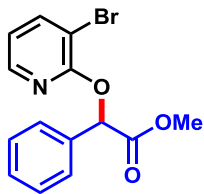

Prepared according to the general procedure from methyl 2-diazo-2-phenylacetate (52.9 mg, 0.3 mmol) and 3-bromopyridin-2(1*H*)-one (104.4 mg, 0.6 mmol, 2.0 equiv). Purified by column chromatography on silica gel (PE : EtOAc = 12:1) to afford the pure product **31**.

Colorless oil; yield: 96.7 mg (76%).

$^1H$  NMR (600 MHz,  $CDCl_3$ ):  $\delta$  = 8.06 (dd,  $J$  = 4.8, 1.8 Hz, 1H), 7.85 (dd,  $J$  = 7.5, 1.5 Hz, 1H), 7.69 (dd,  $J$  = 5.1, 3.3 Hz, 2H), 7.44–7.37 (m, 3H), 6.83 (dd,  $J$  = 7.5, 5.1 Hz, 1H), 6.21 (s, 1H), 3.71 (s, 3H).

$^{13}C$  NMR (150 MHz,  $CDCl_3$ ):  $\delta$  = 170.2, 158.5, 145.2, 142.0, 134.6, 128.9, 128.7, 127.3, 118.7, 107.0, 76.4, 52.4.

HRMS (ESI):  $m/z$   $[M+H]^+$  calcd for  $C_{14}H_{13}BrNO_3^+$ : 322.0073; found: 322.0074.



### 30) Methyl 2-phenyl-2-((4-(trifluoromethyl)pyridin-2-yl)oxy)acetate (32)

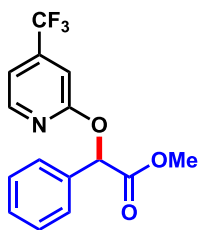

Prepared according to the general procedure from methyl 2-diazo-2-phenylacetate (52.9 mg, 0.3 mmol) and 4-(trifluoromethyl)pyridin-2(1H)-one (97.9 mg, 0.6 mmol, 2.0 equiv). Purified by column chromatography on silica gel (PE : EtOAc = 12:1) to afford the pure product **32**.

Colorless oil; yield: 68.2 mg (73%).

$^1\text{H}$  NMR (600 MHz,  $\text{CDCl}_3$ ):  $\delta$  = 8.29 (d,  $J$  = 5.4 Hz, 1H), 7.60 (dd,  $J$  = 7.8, 1.2 Hz, 2H), 7.44–7.38 (m, 3H), 7.18 (s, 1H), 7.13 (d,  $J$  = 5.4 Hz, 1H), 6.25 (s, 1H), 3.73 (s, 3H).

$^{13}\text{C}$  NMR (150 MHz,  $\text{CDCl}_3$ ):  $\delta$  = 170.2, 162.7, 148.0, 141.4, 141.2, 134.5, 129.2, 128.8, 127.7, 123.4, 121.6, 113.2 (d,  $J$  = 3.3 Hz), 108.1 (d,  $J$  = 4.05 Hz), 76.2, 52.5.

$^{19}\text{F}$  NMR (376 MHz,  $\text{CDCl}_3$ ):  $\delta$  = -70.15 (s).

HRMS (ESI):  $m/z$   $[\text{M}+\text{H}]^+$  calcd for  $\text{C}_{15}\text{H}_{13}\text{F}_3\text{NO}_3^+$ : 312.0842; found: 312.0843.

### 31) Methyl 2-((4-methylpyridin-2-yl)oxy)-2-phenylacetate (33)

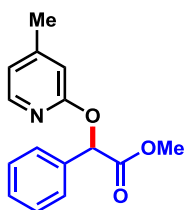

Prepared according to the general procedure from methyl 2-diazo-2-phenylacetate (52.9 mg, 0.3 mmol) and 4-methylpyridin-2(1H)-one (65.5 mg, 0.6 mmol, 2.0 equiv). Purified by column chromatography on silica gel (PE : EtOAc = 12:1) to afford the pure product **33**.

Colorless oil; yield: 54.8 mg (71%).

$^1\text{H}$  NMR (600 MHz,  $\text{CDCl}_3$ ):  $\delta$  = 7.98 (d,  $J$  = 7.2 Hz, 1H), 7.63–7.59 (m, 2H), 7.42–7.37 (m, 3H), 6.80–6.70 (m, 2H), 6.23 (s, 1H), 3.71 (s, 3H), 2.31 (s, 3H).

$^{13}\text{C}$  NMR (150 MHz,  $\text{CDCl}_3$ ):  $\delta$  = 170.9, 162.6, 150.3, 146.1, 135.2, 128.8, 128.6, 127.6, 119.1, 111.3, 75.4, 52.3, 20.9.

HRMS (ESI):  $m/z$   $[\text{M}+\text{H}]^+$  calcd for  $\text{C}_{15}\text{H}_{16}\text{NO}_3^+$ : 258.1125; found: 258.1127.

### 32) Methyl 2-((5-chloropyridin-2-yl)oxy)-2-phenylacetate (34)

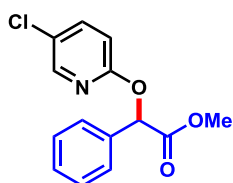

Prepared according to the general procedure from methyl 2-diazo-2-phenylacetate (52.9 mg, 0.3 mmol) and 5-chloropyridin-2(1*H*)-one (77.7 mg, 0.6 mmol, 2.0 equiv). Purified by column chromatography on silica gel (PE : EtOAc = 12:1) to afford the pure product **34**.

Colorless oil; yield: 58.3 mg (70%).

$^1\text{H}$  NMR (600 MHz,  $\text{CDCl}_3$ ):  $\delta$  = 8.07 (d,  $J$  = 2.4 Hz, 1H), 7.60–7.57 (m, 3H), 7.43–7.39 (m, 3H), 6.89 (d,  $J$  = 8.7 Hz, 1H), 6.17 (s, 1H), 3.72 (s, 3H).

$^{13}\text{C}$  NMR (150 MHz,  $\text{CDCl}_3$ ):  $\delta$  = 170.4, 160.7, 144.9, 138.9, 134.7, 129.1, 128.7, 127.6, 125.1, 112.3, 76.0, 52.5.

HRMS (ESI):  $m/z$   $[\text{M}+\text{H}]^+$  calcd for  $\text{C}_{14}\text{H}_{13}\text{ClNO}_3^+$ : 278.0578; found: 278.0582.

### 33) Methyl 2-((5-nitropyridin-2-yl)oxy)-2-phenylacetate (35)

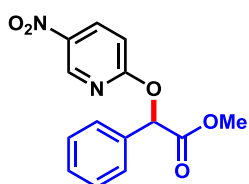

Prepared according to the general procedure from methyl 2-diazo-2-phenylacetate (52.9 mg, 0.3 mmol) and 5-nitropyridin-2(1*H*)-one (84.1 mg, 0.6 mmol, 2.0 equiv). Purified by column chromatography on silica gel (PE : EtOAc = 12:1) to afford the pure product **35**.

Colorless oil; yield: 57.1 mg (68%).

$^1\text{H}$  NMR (600 MHz,  $\text{CDCl}_3$ ):  $\delta$  = 9.05 (d,  $J$  = 2.4 Hz, 1H), 8.42–8.40 (m, 1H), 7.59–7.58 (m, 2H), 7.45–7.41 (m, 3H), 7.03 (d,  $J$  = 9.0 Hz, 1H), 6.32 (s, 1H), 3.74 (s, 3H).

$^{13}\text{C}$  NMR (150 MHz,  $\text{CDCl}_3$ ):  $\delta$  = 169.5, 165.6, 144.3, 140.2, 134.4, 134.0, 129.4, 128.9, 127.7, 111.6, 76.8, 52.6.

HRMS (ESI):  $m/z$   $[\text{M}+\text{Na}]^+$  calcd for  $\text{C}_{14}\text{H}_{12}\text{NaN}_2\text{O}_5^+$ : 311.0638; found: 311.0641.

### 34) Methyl 2-((6-chloropyridin-2-yl)oxy)-2-phenylacetate (36)

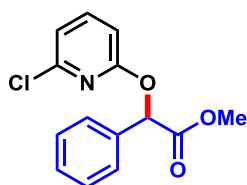

Prepared according to the general procedure from methyl 2-diazo-2-phenylacetate (52.9 mg, 0.3 mmol) and 6-chloropyridin-2(1*H*)-one (77.7 mg, 0.6 mmol, 2.0 equiv). Purified by column chromatography on silica gel (PE : EtOAc = 12:1) to afford the pure product **36**.

Colorless oil; yield: 62.5 mg (75%).

$^1\text{H}$  NMR (600 MHz,  $\text{CDCl}_3$ ):  $\delta$  = 7.61–7.55 (m, 3H), 7.43–7.39 (m, 3H), 6.95 (d,  $J$  = 7.8 Hz, 1H), 6.85 (d,  $J$  = 8.4 Hz, 1H), 6.20 (s, 1H), 3.75 (s, 3H).

$^{13}\text{C}$  NMR (150 MHz,  $\text{CDCl}_3$ ):  $\delta$  = 170.2, 161.8, 147.9, 141.0, 134.5, 129.1, 128.7, 127.7, 117.3, 109.4, 76.0, 52.4.

HRMS (ESI):  $m/z$   $[\text{M}+\text{H}]^+$  calcd for  $\text{C}_{14}\text{H}_{13}\text{ClNO}_3^+$ : 278.0578; found: 278.0583.

### 35) Methyl 2-((6-methylpyridin-2-yl)oxy)-2-phenylacetate (37)

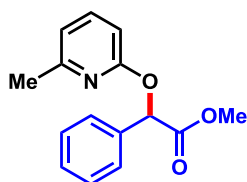

Prepared according to the general procedure from methyl 2-diazo-2-phenylacetate (52.9 mg, 0.3 mmol) and 6-methylpyridin-2(1*H*)-one (65.5 mg, 0.6 mmol, 2.0 equiv). Purified by column chromatography on silica gel (PE : EtOAc = 12:1) to afford the pure product **37**.

Colorless oil; yield: 60.2 mg (78%).

$^1\text{H}$  NMR (600 MHz,  $\text{CDCl}_3$ ):  $\delta$  = 7.63–7.62 (m, 2H), 7.49 (dd,  $J$  = 8.4, 7.2 Hz, 1H), 7.43–7.36 (m, 3H), 6.74 (dd,  $J$  = 18.6, 7.8 Hz, 2H), 6.20 (s, 1H), 3.72 (s, 3H), 2.41 (s, 3H).

$^{13}\text{C}$  NMR (150 MHz,  $\text{CDCl}_3$ ):  $\delta$  = 171.0, 161.6, 155.8, 139.1, 135.2, 128.8, 128.6, 127.7, 116.5, 107.7, 75.5, 52.2, 23.9.

HRMS (ESI):  $m/z$   $[\text{M}+\text{H}]^+$  calcd for  $\text{C}_{15}\text{H}_{16}\text{NO}_3^+$ : 258.1125; found: 258.1128.

### 36) Methyl 2-((3-bromo-5-nitropyridin-2-yl)oxy)-2-phenylacetate (38)

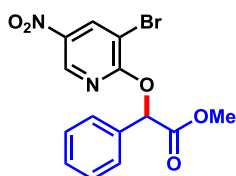

Prepared according to the general procedure from methyl 2-diazo-2-phenylacetate (52.9 mg, 0.3 mmol) and 3-bromo-5-nitropyridin-2(1*H*)-one (131.4 mg, 0.6 mmol, 2.0 equiv). Purified by column chromatography on silica gel (PE : EtOAc = 12:1) to afford the pure product **38**.

Colorless oil; yield: 72.7 mg (66%).

$^1\text{H}$  NMR (600 MHz,  $\text{CDCl}_3$ ):  $\delta$  = 8.98 (d,  $J$  = 2.4 Hz, 1H), 8.68 (d,  $J$  = 2.4 Hz, 1H), 7.65 (dd,  $J$  = 7.8, 1.2 Hz, 2H), 7.45–7.42 (m, 3H), 6.29 (s, 1H), 3.73 (s, 3H).

$^{13}\text{C}$  NMR (150 MHz,  $\text{CDCl}_3$ ):  $\delta$  = 169.0, 162.0, 142.2, 140.0, 137.1, 133.4, 130.1, 129.4, 128.9, 127.4, 107.1, 77.9, 52.8.

HRMS (ESI):  $m/z$   $[\text{M}+\text{H}]^+$  calcd for  $\text{C}_{14}\text{H}_{12}\text{BrN}_2\text{O}_5^+$ : 366.9924; found: 366.9927.

### 37) Methyl 2-((5-bromo-3-methylpyridin-2-yl)oxy)-2-phenylacetate (39)

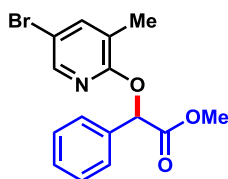

Prepared according to the general procedure from methyl 2-diazo-2-phenylacetate (52.9 mg, 0.3 mmol) and 5-bromo-3-methylpyridin-2(1*H*)-one (112.8 mg, 0.6 mmol, 2.0 equiv). Purified by column chromatography on silica gel (PE : EtOAc = 12:1) to afford the pure product **39**.

Colorless oil; yield: 57.3 mg (57%).

$^1\text{H}$  NMR (400 MHz,  $\text{CDCl}_3$ ):  $\delta$  = 8.01 (dd,  $J$  = 2.4, 0.4 Hz, 1H), 7.64–7.62 (m, 2H), 7.56–7.55 (m, 1H), 7.45–7.39 (m, 3H), 6.17 (s, 1H), 3.71 (s, 3H), 2.31 (s, 3H).

$^{13}\text{C}$  NMR (150 MHz,  $\text{CDCl}_3$ ):  $\delta$  = 170.4, 159.5, 144.2, 141.2, 135.0, 128.8, 128.6, 128.5, 127.4, 123.0, 112.4, 75.8, 52.3, 41.1, 15.5.

HRMS (ESI):  $m/z$   $[\text{M}+\text{H}]^+$  calcd for  $\text{C}_{15}\text{H}_{15}\text{BrNO}_3^+$ : 336.0230; found: 336.0231.

### 38) Methyl 2-phenyl-2-(quinolin-2-yl)oxyacetate (40)<sup>[11]</sup>

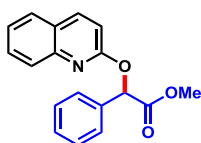

Prepared according to the general procedure from methyl 2-diazo-2-phenylacetate (52.9 mg, 0.3 mmol) and quinolin-2(1*H*)-one (87.1 mg, 0.6 mmol, 2.0 equiv). Purified by column chromatography on silica gel (PE : EtOAc = 12:1) to afford the pure product **40**.

Colorless oil; yield: 71.3mg (81%).

<sup>1</sup>H NMR (600 MHz, CDCl<sub>3</sub>): δ = 8.05 (d, *J* = 8.4 Hz, 1H), 7.83 (d, *J* = 8.4 Hz, 1H), 7.74 (d, *J* = 7.8 Hz, 1H), 7.69 (d, *J* = 7.2 Hz, 2H), 7.65–7.62 (m, 1H), 7.46–7.39 (m, 4H), 7.10 (d, *J* = 9.0 Hz, 1H), 6.45 (s, 1H), 3.75 (s, 3H).

<sup>13</sup>C NMR (150 MHz, CDCl<sub>3</sub>): δ = 170.8, 160.6, 146.0, 139.3, 135.0, 129.6, 129.0, 128.7, 127.8, 127.40, 127.37, 125.4, 124.4, 112.7, 75.8, 52.4.

HRMS (ESI): *m/z* [M+H]<sup>+</sup> calcd for C<sub>18</sub>H<sub>16</sub>NO<sub>3</sub><sup>+</sup>: 294.1125; found: 294.1125.

### 39) Methyl 2-(benzo[*d*]thiazol-2-yloxy)-2-phenylacetate (41)

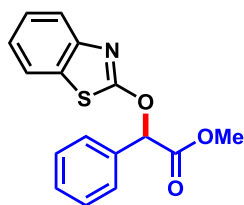

Prepared according to the general procedure from methyl 2-diazo-2-phenylacetate (52.9 mg, 0.3 mmol) and benzo[*d*]thiazol-2-ol (90.7 mg, 0.6 mmol, 2.0 equiv). Purified by column chromatography on silica gel (PE : EtOAc = 12:1) to afford the pure product **41**.

Colorless oil; yield: 61.9 mg (69%).

<sup>1</sup>H NMR (600 MHz, CDCl<sub>3</sub>): δ = 7.71–7.64 (m, 2H), 7.60 (dd, *J* = 7.5, 2.1 Hz, 2H), 7.45–7.42 (m, 3H), 7.38–7.36 (m, 1H), 7.24 (d, *J* = 7.3 Hz, 1H), 6.44 (s, 1H), 3.77 (s, 3H).

<sup>13</sup>C NMR (150 MHz, CDCl<sub>3</sub>): δ = 171.4, 169.1, 148.8, 133.7, 132.3, 129.5, 128.9, 127.7, 126.0, 123.8, 121.3, 121.2, 80.1, 52.8.

HRMS (ESI): *m/z* [M+H]<sup>+</sup> calcd for C<sub>16</sub>H<sub>14</sub>NO<sub>3</sub>S<sup>+</sup>: 300.0689; found: 300.0691.

### 40) Methyl 2-phenyl-2-(pyridin-2-ylthio)acetate (42)

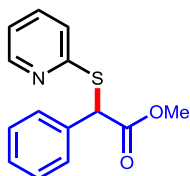

Prepared according to the general procedure from methyl 2-diazo-2-phenylacetate (52.9 mg, 0.3

mmol) and pyridine-2-thiol (66.7 mg, 0.6 mmol, 2.0 equiv). Purified by column chromatography on silica gel (PE : EtOAc = 12:1) to afford the pure product **42**.

Colorless oil; yield: 49.0mg (63%).

$^1\text{H}$  NMR (400 MHz,  $\text{CDCl}_3$ ):  $\delta$  = 8.41–8.40 (m, 1H), 7.52 (dt,  $J$  = 3.8, 2.2 Hz, 2H), 7.45–7.42 (m, 1H), 7.36–7.3 (m, 3H), 7.16 (dt,  $J$  = 8.2, 1.0 Hz, 1H), 6.99–6.95 (m, 1H), 5.74 (s, 1H), 3.72 (s, 3H).

$^{13}\text{C}$  NMR (150 MHz,  $\text{CDCl}_3$ ):  $\delta$  = 171.2, 157.2, 149.2, 136.0, 135.0, 128.7, 128.5, 128.2, 121.6, 119.8, 52.7, 51.4.

HRMS (ESI):  $m/z$   $[\text{M}+\text{Na}]^+$  calcd for  $\text{C}_{14}\text{H}_{13}\text{NNaO}_2\text{S}^+$ : 282.0559; found: 282.0559.

#### 41) Methyl 2-(4-nitrophenoxy)-2-phenylacetate (**43**)<sup>[11]</sup>

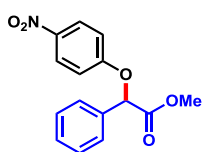

Prepared according to the general procedure from methyl 2-diazo-2-phenylacetate (52.9 mg, 0.3 mmol) and 4-nitrophenol (83.5 mg, 0.6 mmol, 2.0 equiv). Purified by column chromatography on silica gel (PE : EtOAc = 12:1) to afford the pure product **43**.

Colorless oil; yield: 68.9 mg (80%).

$^1\text{H}$  NMR (400 MHz,  $\text{CDCl}_3$ ):  $\delta$  = 8.22–8.16 (m, 2H), 7.59–7.54 (m, 2H), 7.45–7.40 (m, 3H), 7.04–6.99 (m, 2H), 5.73 (s, 1H), 3.76 (s, 3H).

$^{13}\text{C}$  NMR (150 MHz,  $\text{CDCl}_3$ ):  $\delta$  = 169.2, 162.0, 142.2, 134.1, 129.5, 129.0, 127.1, 125.9, 115.4, 78.8, 52.9.

#### 42) Methyl 2-phenyl-2-(phenylamino)acetate (**44**)

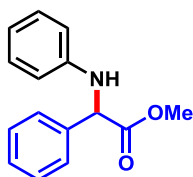

Prepared according to the general procedure from methyl 2-diazo-2-phenylacetate (52.9 mg, 0.3 mmol) and aniline (55.9 mg, 0.6 mmol, 2.0 equiv). Purified by column chromatography on silica gel (PE : EtOAc = 12:1) to afford the pure product **44**.

Colorless oil; yield: 57.2 mg (79%).

$^1\text{H}$  NMR (400 MHz,  $\text{CDCl}_3$ ):  $\delta$  = 7.56 (dd,  $J$  = 5.2, 3.6 Hz, 2H), 7.43–7.33 (m, 3H), 7.20–7.14 (m, 2H),

6.78–6.72 (m, 1H), 6.61 (dd,  $J = 8.6, 1.0$  Hz, 2H), 5.14 (s, 1H), 5.03 (s, 1H), 3.76 (s, 3H).

$^{13}\text{C}$  NMR (150 MHz,  $\text{CDCl}_3$ ):  $\delta = 172.2, 145.9, 137.6, 129.1, 128.8, 128.2, 127.2, 118.0, 113.3, 60.7, 52.7$ .

HRMS (ESI):  $m/z$   $[\text{M}+\text{H}]^+$  calcd for  $\text{C}_{15}\text{H}_{16}\text{NO}_2^+$ : 242.1176; found: 242.1176.

#### 43) Methyl 2-(1*H*-indazol-1-yl)-2-phenylacetate (45)

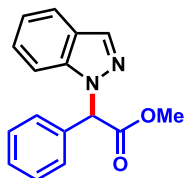

Prepared according to the general procedure from methyl 2-diazo-2-phenylacetate (52.9 mg, 0.3 mmol) and 1*H*-indazole (70.9 mg, 0.6 mmol, 2.0 equiv). Purified by column chromatography on silica gel (PE : EtOAc = 12:1) to afford the pure product **45**.

Colorless oil; yield: 49.0 mg (57%).

$^1\text{H}$  NMR (400 MHz,  $\text{CDCl}_3$ ):  $\delta =$  (d,  $J = 0.8$  Hz, 1H), 7.73 (dd,  $J = 8.0, 0.8$  Hz, 1H), 7.45–7.34 (m, 5H), 7.32–7.27 (m, 1H), 7.21–7.12 (m, 2H), 6.51 (s, 1H), 3.82 (s, 3H).

$^{13}\text{C}$  NMR (150 MHz,  $\text{CDCl}_3$ ):  $\delta = 169.2, 139.8, 134.4, 134.1, 129.6, 128.8, 128.4, 128.1, 128.0, 126.6, 124.7, 121.2, 121.0, 109.9, 65.9, 52.9$ .

HRMS (ESI):  $m/z$   $[\text{M}+\text{Na}]^+$  calcd for  $\text{C}_{16}\text{H}_{14}\text{N}_2\text{NaO}_2^+$ : 289.0947; found: 289.0947.

## 8. Gram-Scale and Control Experiments

### 1) Procedure for gram-scale synthesis of **3**

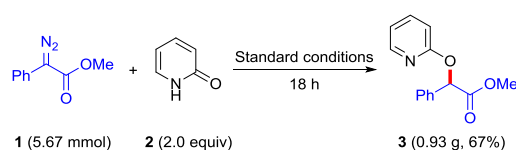

Methyl 2-diazo-2-phenylacetate **1** (1.00 g, 5.67 mmol), 2-pyridone **2** (1.08 g, 11.34 mmol, 2.0 equiv) and DCM (25 mL) were added into a 50 mL Pyrex glass tube. The reaction mixture was continually stirred under 6 W blue LED irradiation at room temperature for 18 hours until **1** was consumed completely (monitored by TLC). The reaction solution was quenched with saturated aq. NaCl (9 mL) and extracted with EtOAc (3  $\times$  15 mL). The combined organic phase was dried over

anhydrous  $\text{Na}_2\text{SO}_4$ , filtered and concentrated under reduced pressure. The crude product was purified by column chromatography on silica gel (PE : EtOAc = 12:1) to afford the pure product **3** (0.93 g, 67% yield).

## 2) Radical-trapping experiment with 2,6-di-*tert*-butyl-4-methylphenol

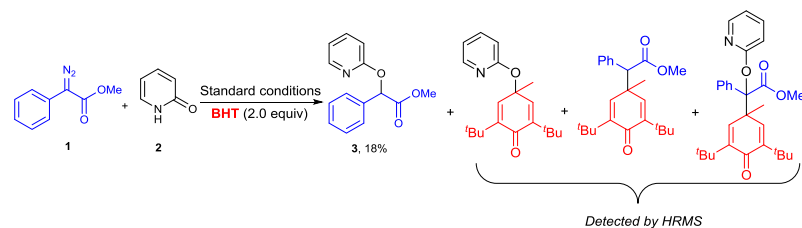

Methyl  $\alpha$ -phenyldiazoacetate **1** (52.9 mg, 0.3 mmol), 2-pyridone **2** (57.1 mg, 0.6 mmol, 2.0 equiv), 2,6-di-*tert*-butyl-4-methylphenol (BHT) (132.2 mg, 0.6 mmol, 2.0 equiv) and DCM (3 mL) were added into a 10 mL Pyrex glass tube. The resulting mixture was continually stirred under 6 W blue LED irradiation at room temperature for 6 hours. The reaction solution was concentrated under reduced pressure. Then, the residue was analyzed by HRMS, and the radical intermediates trapped by BHT were detected (**Figure S4–S6**, data of  $[\text{M}+\text{H}]^+$  are showed). In addition, **3** was obtained in 18% yield by column chromatography isolation on silica gel (PE : EtOAc = 12:1).

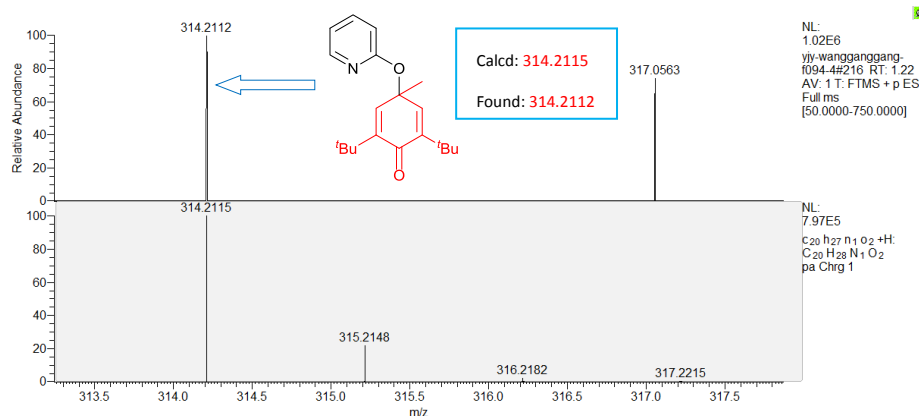

Figure S4

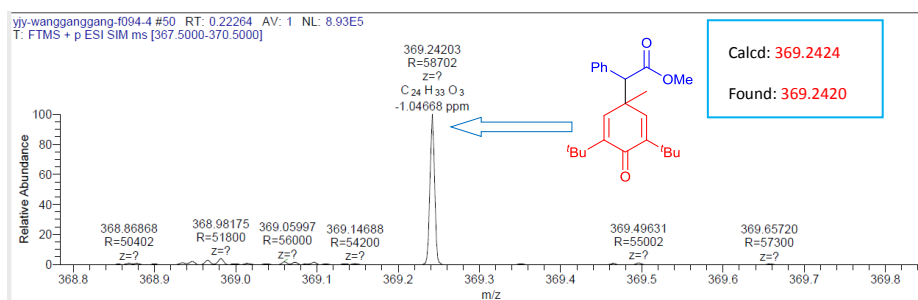

Figure S5



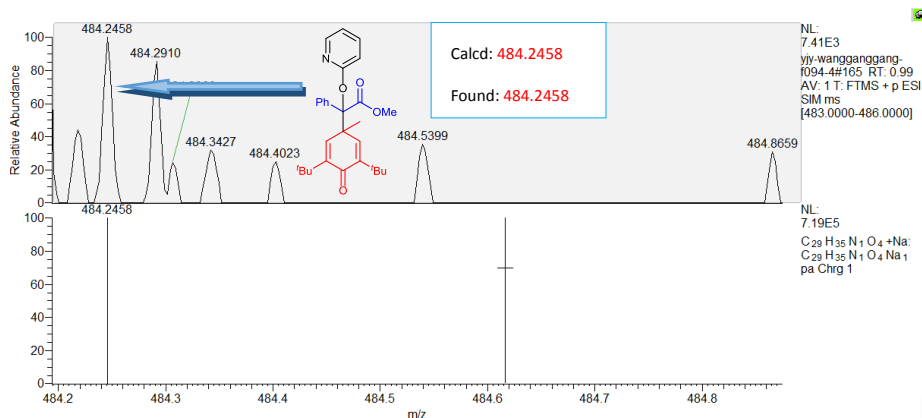

Figure S6

### 3) Radical-trapping experiment with TEMPO

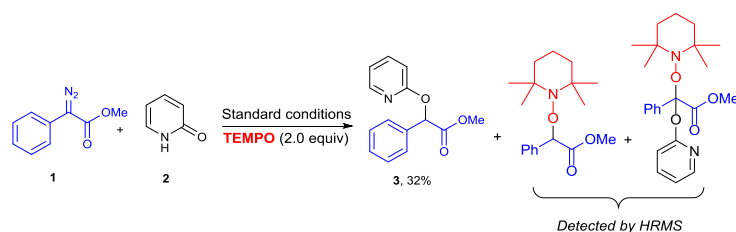

Methyl 2-diazo-2-phenylacetate **1** (52.9 mg, 0.3 mmol), 2-pyridones **2** (57.1 mg, 0.6 mmol, 2.0 equiv), TEMPO (93.8 mg, 0.6 mmol, 2.0 equiv) and DCM (3 mL) were added into a 10 mL Pyrex glass tube. The resulting mixture was continually stirred at room temperature under 6 W blue LED irradiation for 6 hours. The reaction solution was concentrated under reduced pressure. Then, the residue was analyzed by HRMS, and the radical intermediates trapped by TEMPO were detected (**Figure S7–S8**, data of  $[M+H]^+$  are showed). In addition, **3** was obtained in 32% yield by column chromatography isolation on silica gel (PE : EtOAc = 12:1).

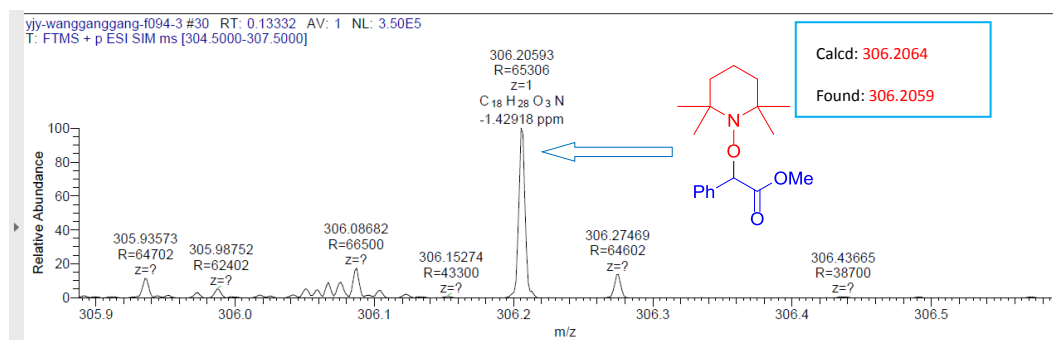

Figure S7

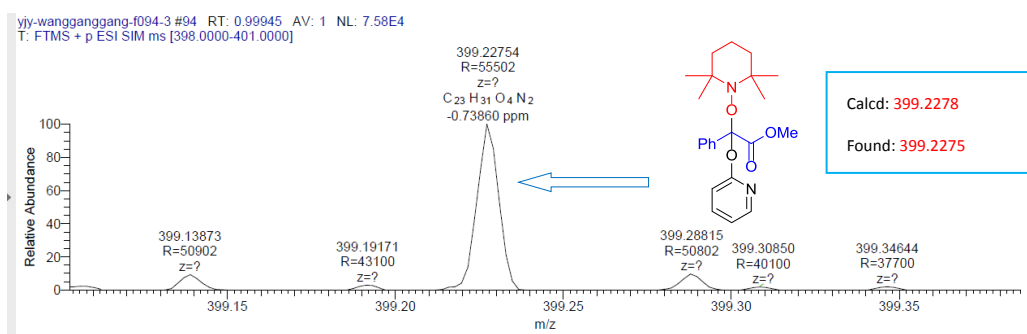

Figure S8

#### 4) Deuterium labeling experiment

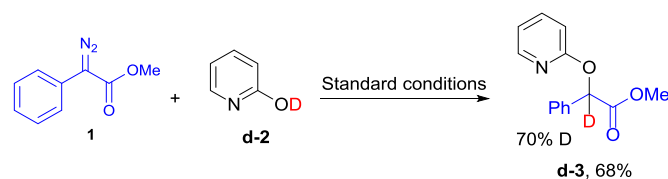

Methyl 2-diazo-2-phenylacetate **1** (52.9 mg, 0.3 mmol), deuterated 2-pyridone **d-2** (58.9 mg, 0.6 mmol, 2 equiv) and dry DCM (3 mL) were added into a 10 mL Pyrex glass tube. The resulting mixture was continually stirred at room temperature under an argon atmosphere by 6 W blue LED irradiation for 6 hours. The reaction solution was concentrated under reduced pressure. The crude product was purified by column chromatography on silica gel (PE : EtOAc = 12:1) to afford the pure deuterated product **d-3** (49.6 mg, 68% yield). Then, **d-3** was analyzed by  $^1\text{H}$  NMR (Figure S9), showing that 70% of deuterium are incorporated.

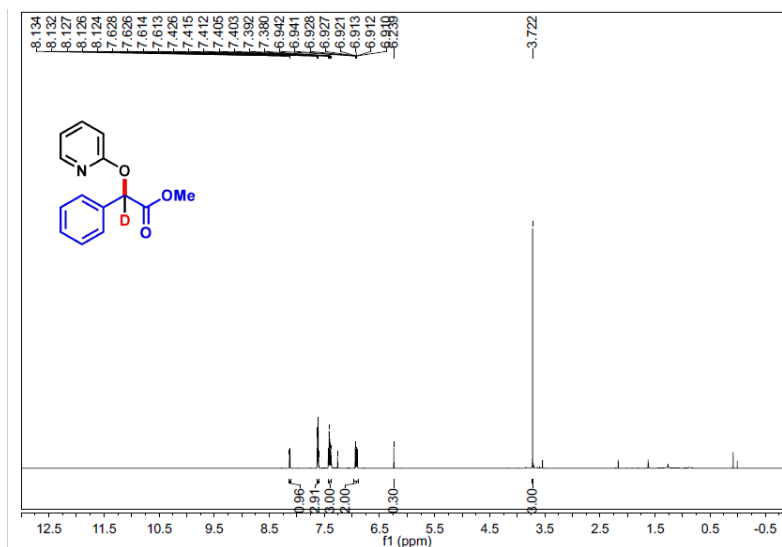

Figure S9

## 9. Quantum Chemical Calculations

The DFT computations employed the (U)M062X/def2-TZVPP SMD (CH<sub>2</sub>Cl<sub>2</sub>) level of theory to find the optimized geometries. Frequency calculations using the identical method and basis set were done to determine that the geometries were at local minima. All the computations were done with the Gaussian 16 program.<sup>[13]</sup> The calculated results show that O–H (C<sub>5</sub>H<sub>5</sub>NOH) and N–H (C<sub>5</sub>H<sub>5</sub>NHO) bond dissociation energy (BDE) is 87.7 kcal/mol and 89.9 kcal/mol respectively.

XYZ Cartesian coordinates

12

C<sub>5</sub>H<sub>5</sub>NHO

|   |          |          |          |
|---|----------|----------|----------|
| C | -1.04953 | 0.05771  | 0.00005  |
| C | -0.24596 | 1.25613  | 0.00001  |
| C | 1.11074  | 1.19437  | -0.00000 |
| C | 1.79483  | -0.05022 | -0.00001 |
| C | 1.04867  | -1.18142 | -0.00001 |
| H | -0.77630 | 2.19772  | -0.00001 |
| H | 1.68576  | 2.11209  | -0.00002 |
| H | 2.87185  | -0.10536 | -0.00002 |
| H | 1.46804  | -2.17701 | -0.00002 |
| O | -2.27719 | 0.00921  | -0.00004 |
| N | -0.30612 | -1.11268 | 0.00001  |
| H | -0.84148 | -1.97185 | 0.00003  |

12

C<sub>5</sub>H<sub>5</sub>NOH

|   |          |          |          |
|---|----------|----------|----------|
| C | -0.89950 | 0.02637  | -0.00002 |
| C | -0.18750 | 1.22740  | -0.00000 |
| C | 1.18875  | 1.15041  | 0.00000  |
| C | 1.80837  | -0.09841 | 0.00000  |
| C | 1.00402  | -1.22046 | 0.00000  |
| H | -0.71679 | 2.16926  | 0.00000  |
| H | 1.78052  | 2.05649  | 0.00001  |
| H | 2.88418  | -0.19528 | 0.00001  |
| H | 1.43781  | -2.21333 | 0.00001  |
| N | -0.33243 | -1.16510 | -0.00001 |
| O | -2.24550 | 0.08170  | 0.00001  |
| H | -2.57959 | -0.82688 | 0.00001  |

11

| C <sub>5</sub> H <sub>5</sub> NO |          |          |          |
|----------------------------------|----------|----------|----------|
| C                                | 1.01377  | -0.01651 | -0.00009 |
| C                                | 0.25569  | 1.22098  | 0.00002  |
| C                                | -1.11650 | 1.19259  | 0.00006  |
| C                                | -1.74500 | -0.04555 | 0.00005  |
| C                                | -0.95036 | -1.22745 | 0.00001  |
| H                                | 0.81721  | 2.14476  | 0.00004  |
| H                                | -1.69335 | 2.10718  | 0.00011  |
| H                                | -2.82183 | -0.13342 | 0.00009  |
| H                                | -1.45399 | -2.18893 | 0.00001  |
| N                                | 0.34779  | -1.24014 | -0.00004 |
| O                                | 2.24647  | 0.00088  | -0.00003 |

## 10. References

- [1] Keipour, H.; Ollevier, T. *Org. Lett.* **2017**, *19*, 5736.
- [2] Davies, H. M. L.; Walji, A. M. *Org. Lett.* **2005**, *7*, 2941.
- [3] Yu, W.-Y.; Tsoi, Y.-T.; Zhou, Z.; Chan, A. S. C. *Org. Lett.* **2009**, *11*, 469.
- [4] Jana, S.; Yang, Z.; Pei, C.; Xu, X.; Koenigs, R. M. *Chem. Sci.* **2019**, *10*, 10129.
- [5] Guo, Y.; Nguyen, T. V.; Koenigs, R. M. *Org. Lett.* **2019**, *21*, 8814.
- [6] Rao, S.; Kapanaiiah, R.; Prabhu, K. R. *Adv. Synth. Catal.* **2019**, *361*, 1301.
- [7] Thurow, S.; Fernandes, A. A. G.; Quevedo-Acosta, Y.; de Oliveira, M. F.; de Oliveira, M. G.; Jurberg, I. D. *Org. Lett.* **2019**, *21*, 6909.
- [8] Li, X.; Ye, X.; Wei, C.; Shan, C.; Wojtas, L.; Wang, Q.; Shi, X. *Org. Lett.* **2020**, *22*, 4151.
- [9] Zhang, Z.; Yu, Y.; Xie, Y.; Hughes, T.; Xu, J.; Huang, F.; Huang, H. *Green Chem.* **2020**, *22*, 4165.
- [10] Yang, J.; Duan, J.; Wang, G.; Zhou, H.; Ma, B.; Wu, C.; Xiao, J. *Org. Lett.* **2020**, *22*, 7284.
- [11] Empel, C.; Jana, S.; Pei, C.; Nguyen, T. V.; Koenigs, R. M. *Org. Lett.* **2020**, *22*, 7225.
- [12] Huang, D., Xu, G., Peng, S., Sun, J. *Chem. Commun.* **2017**, *53*, 3197.
- [13] Frisch, M. J.; Trucks, G. W.; Schlegel, G. W.; Scuseria, G. W. *Gaussian 16, Revision C.01*; Gaussian, Inc., Wallingford CT, 2016.

## 11. Cope of NMR Spectra

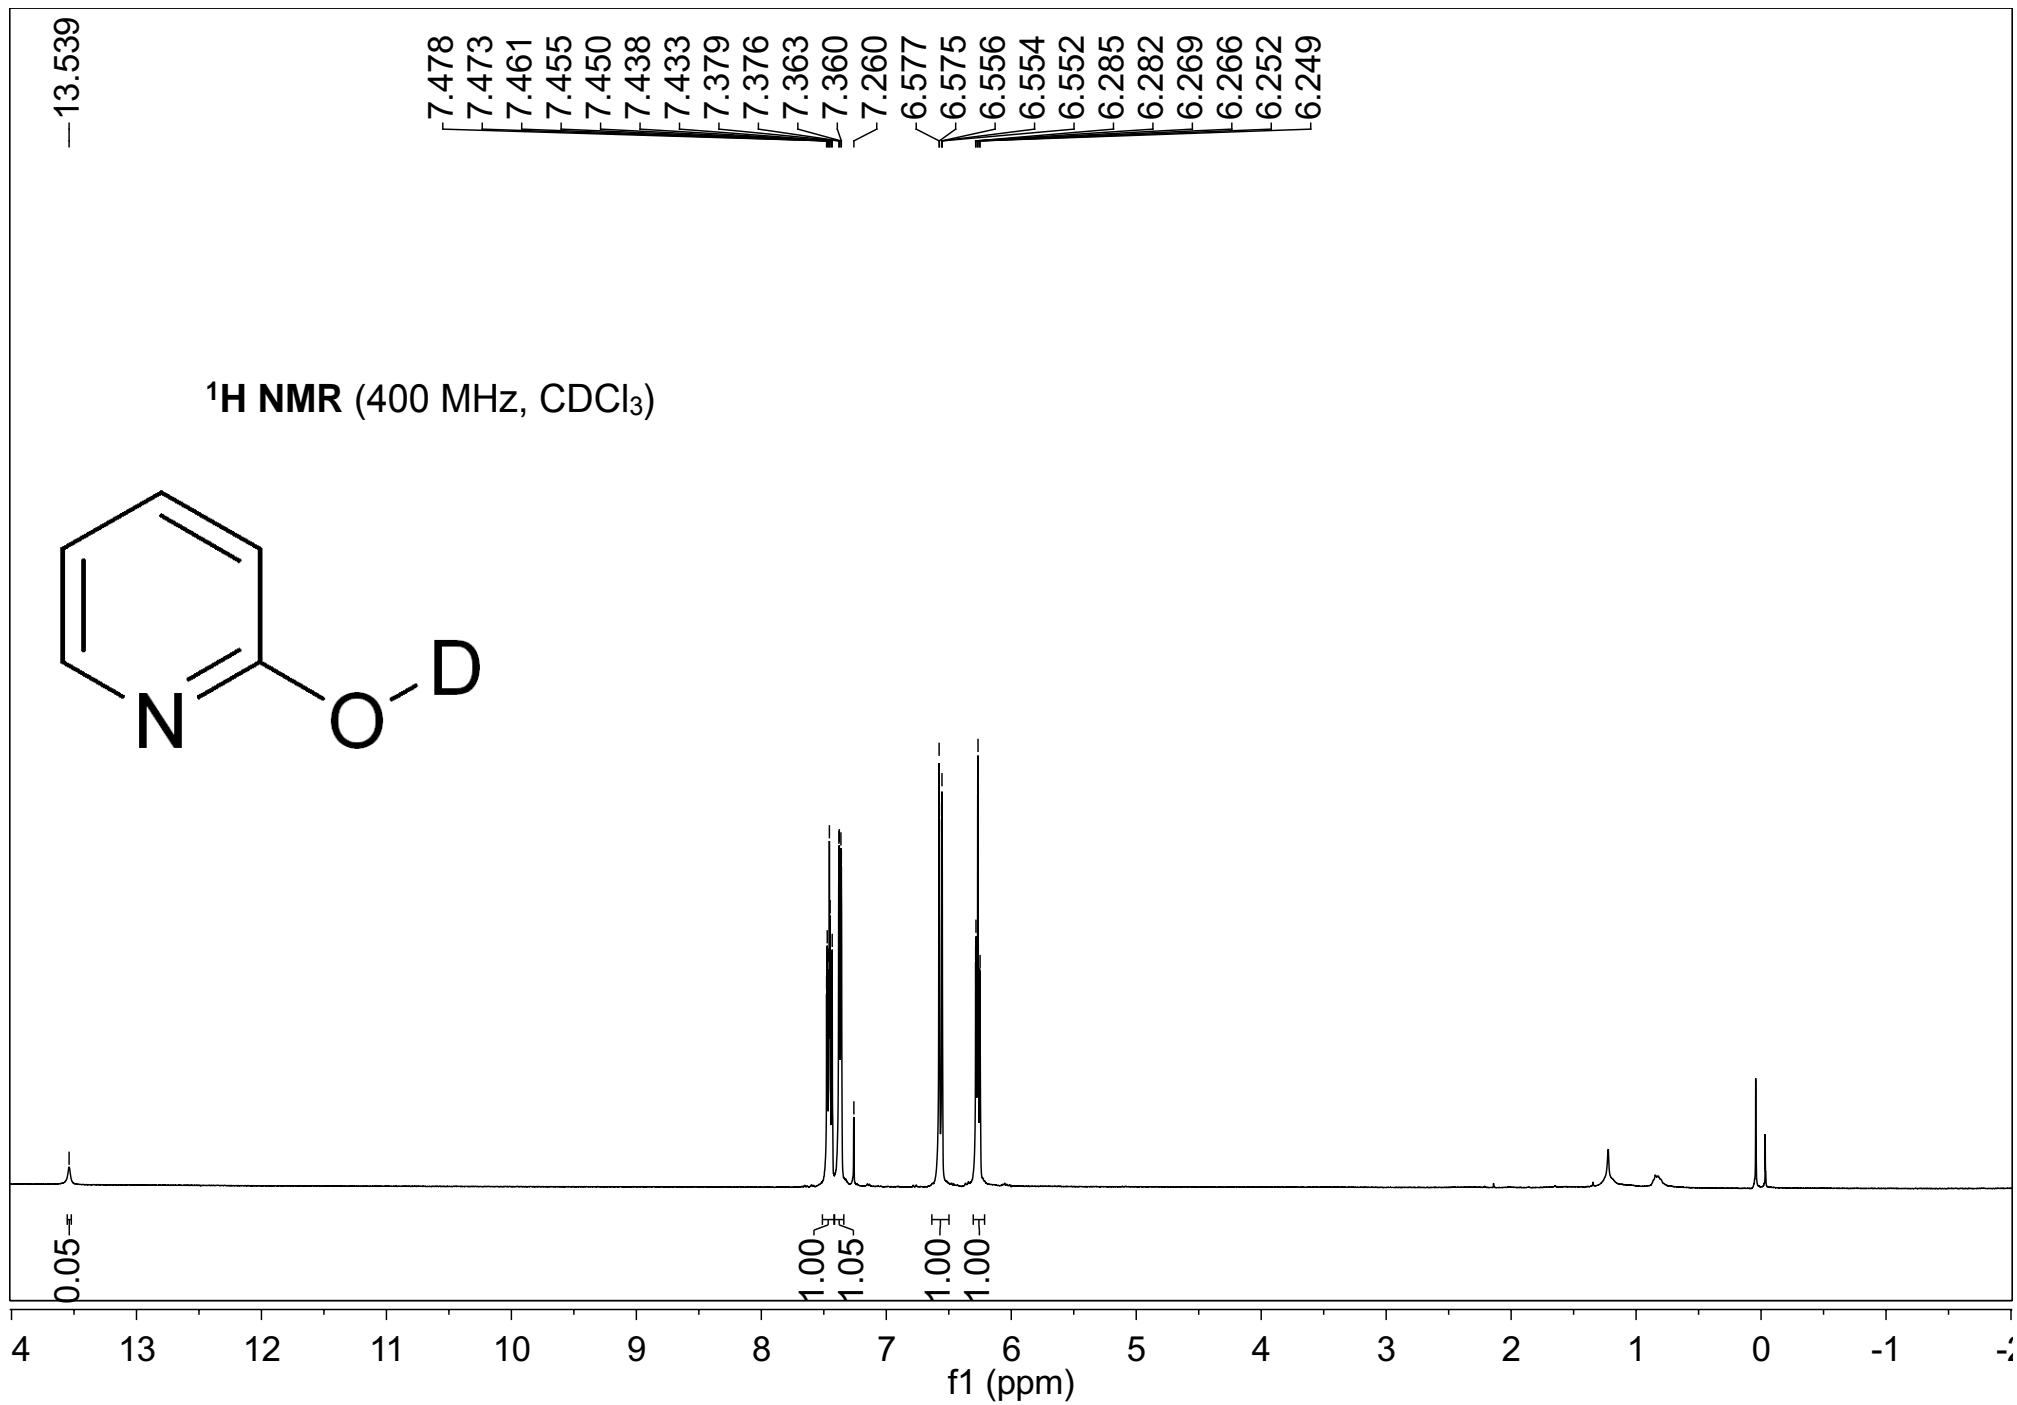

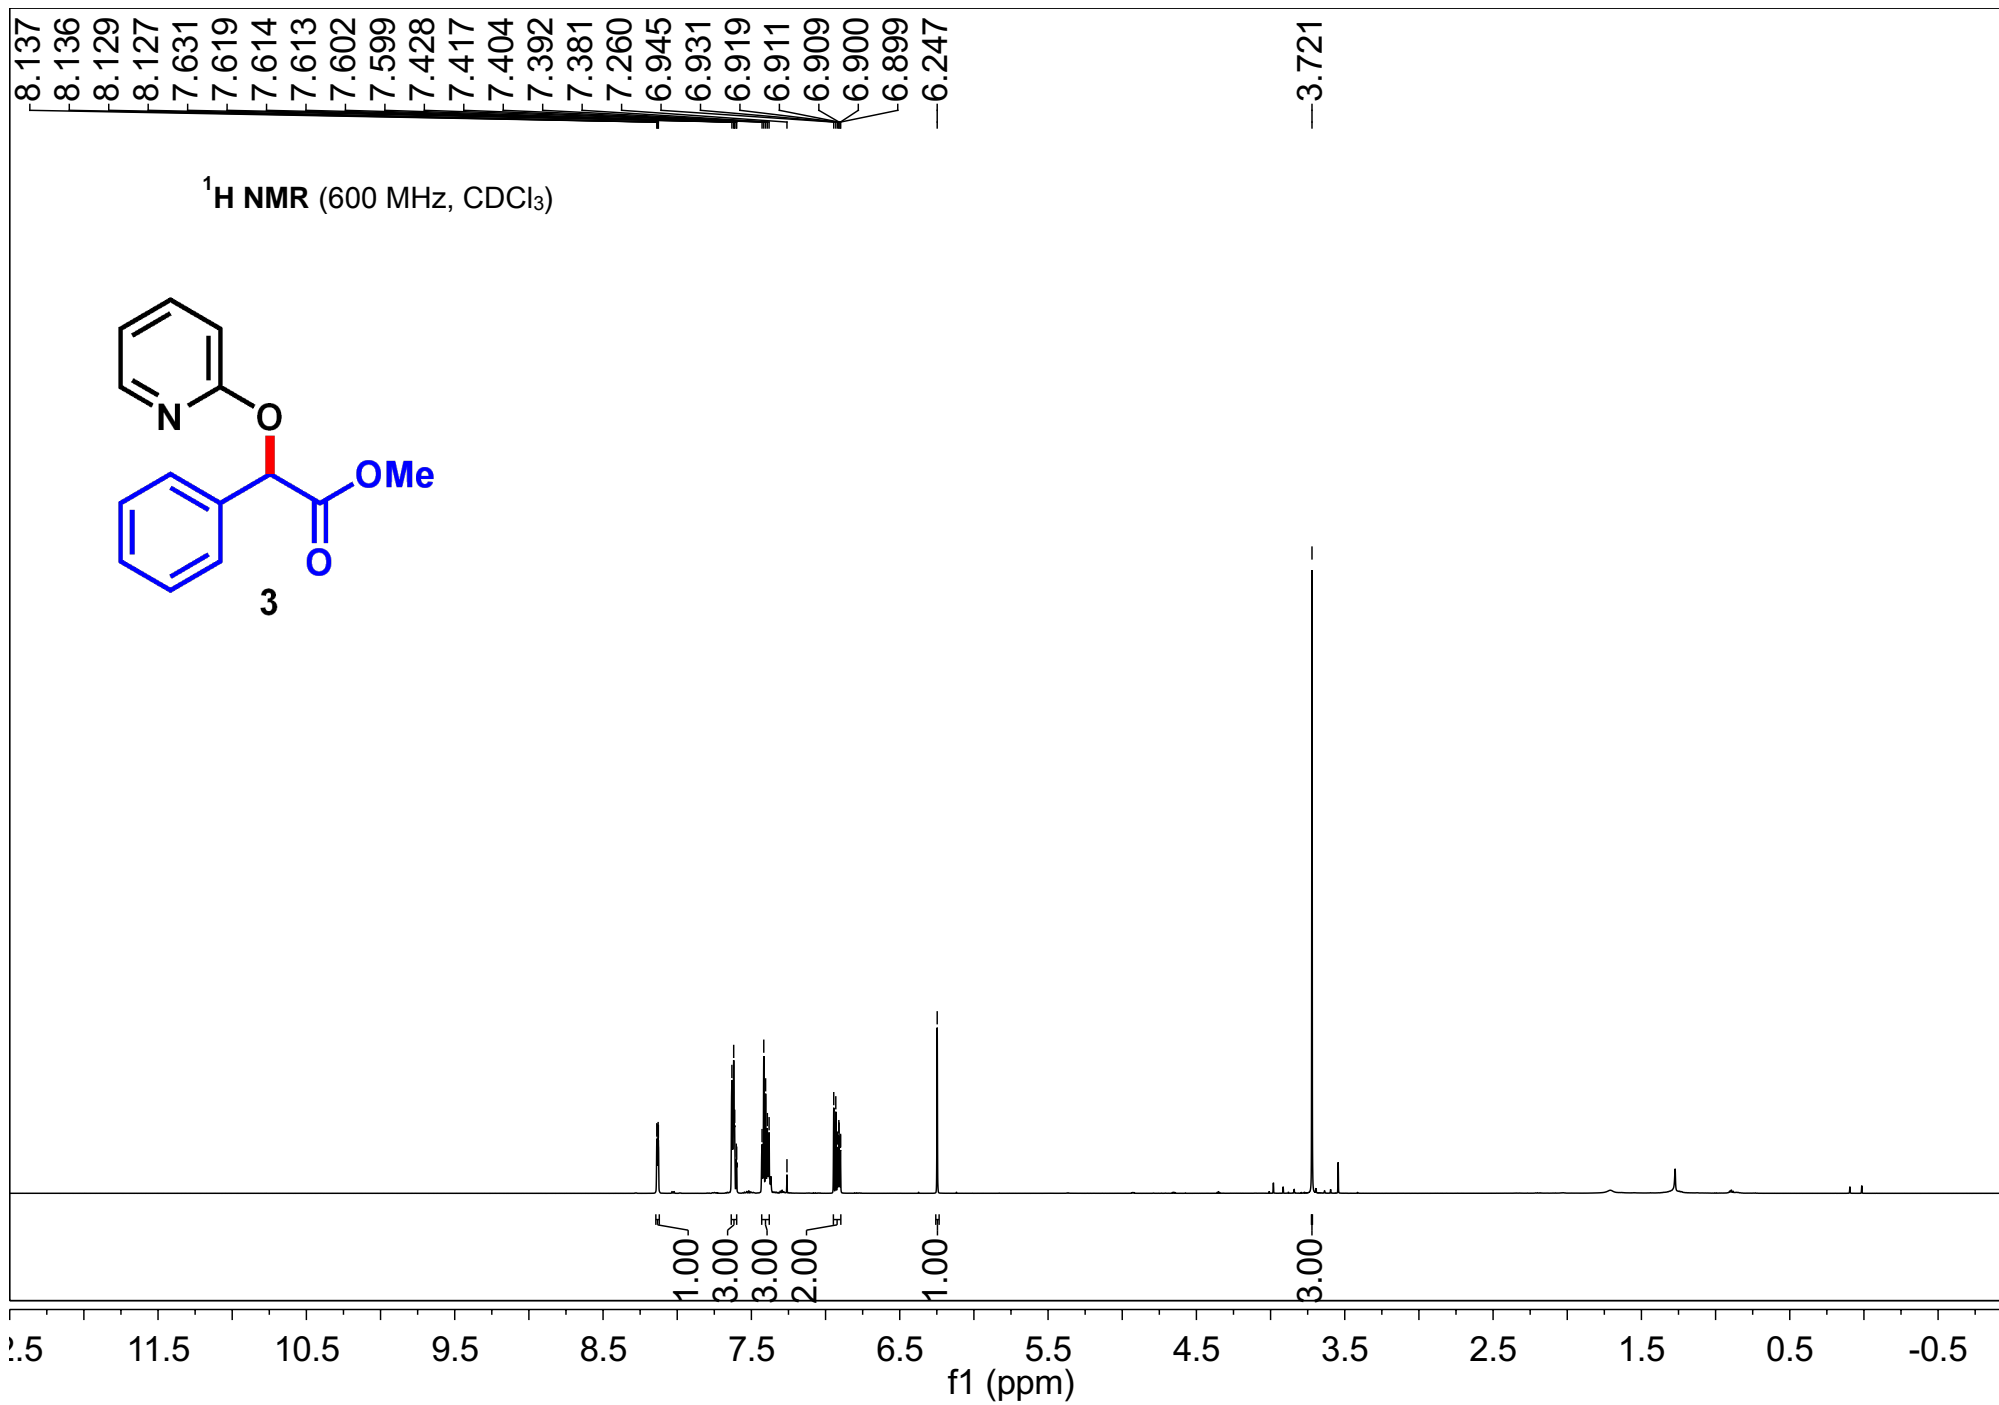

<sup>13</sup>C NMR (150 MHz, CDCl<sub>3</sub>)

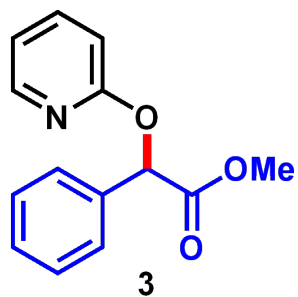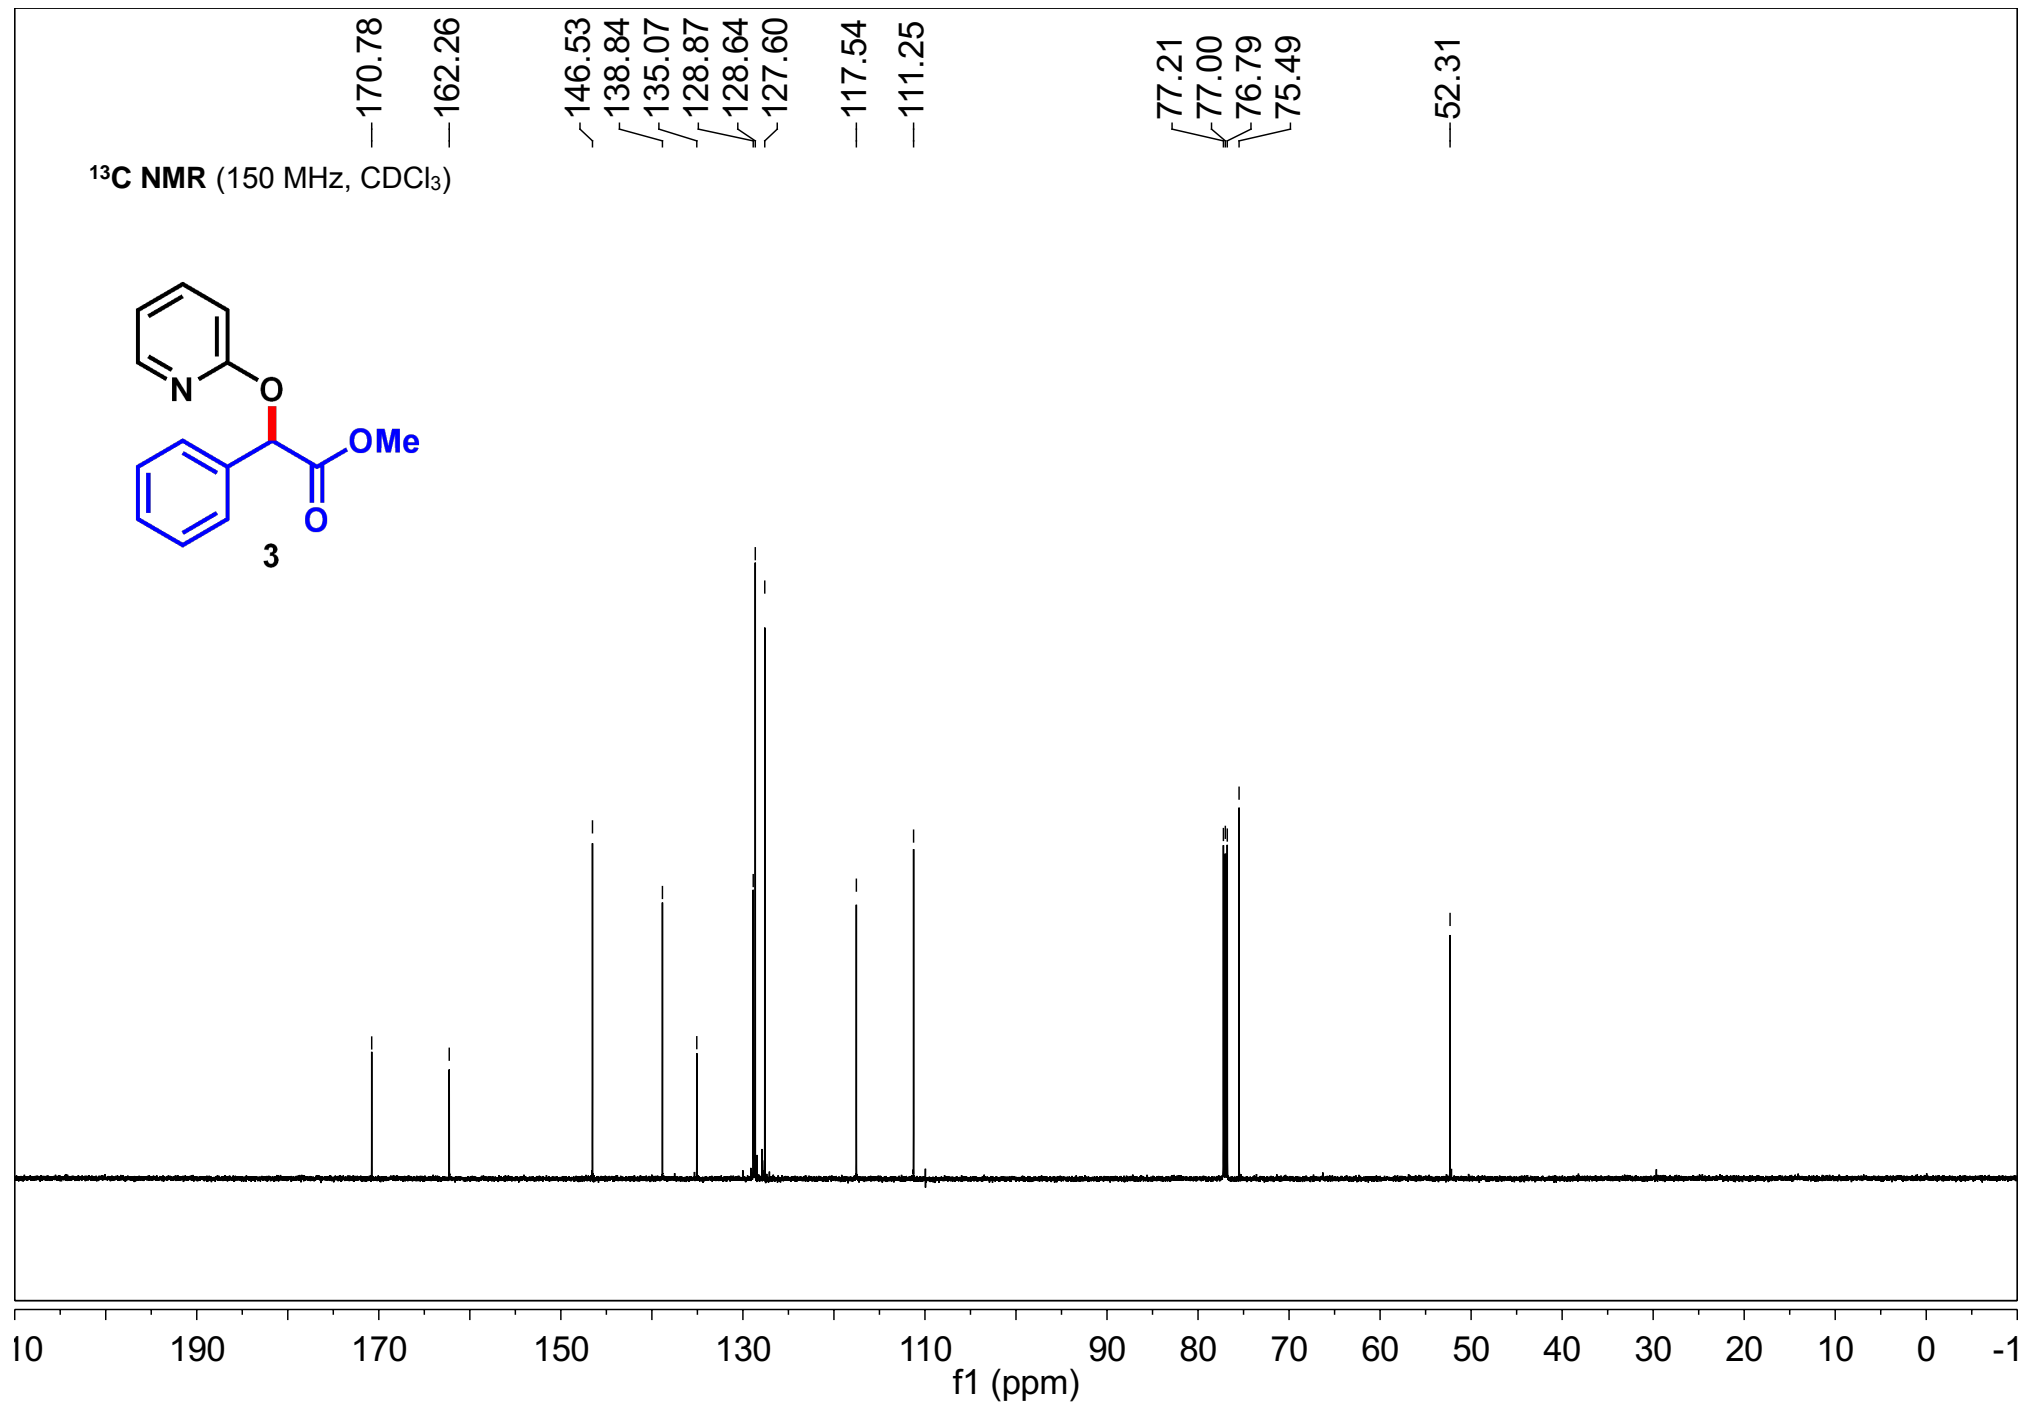

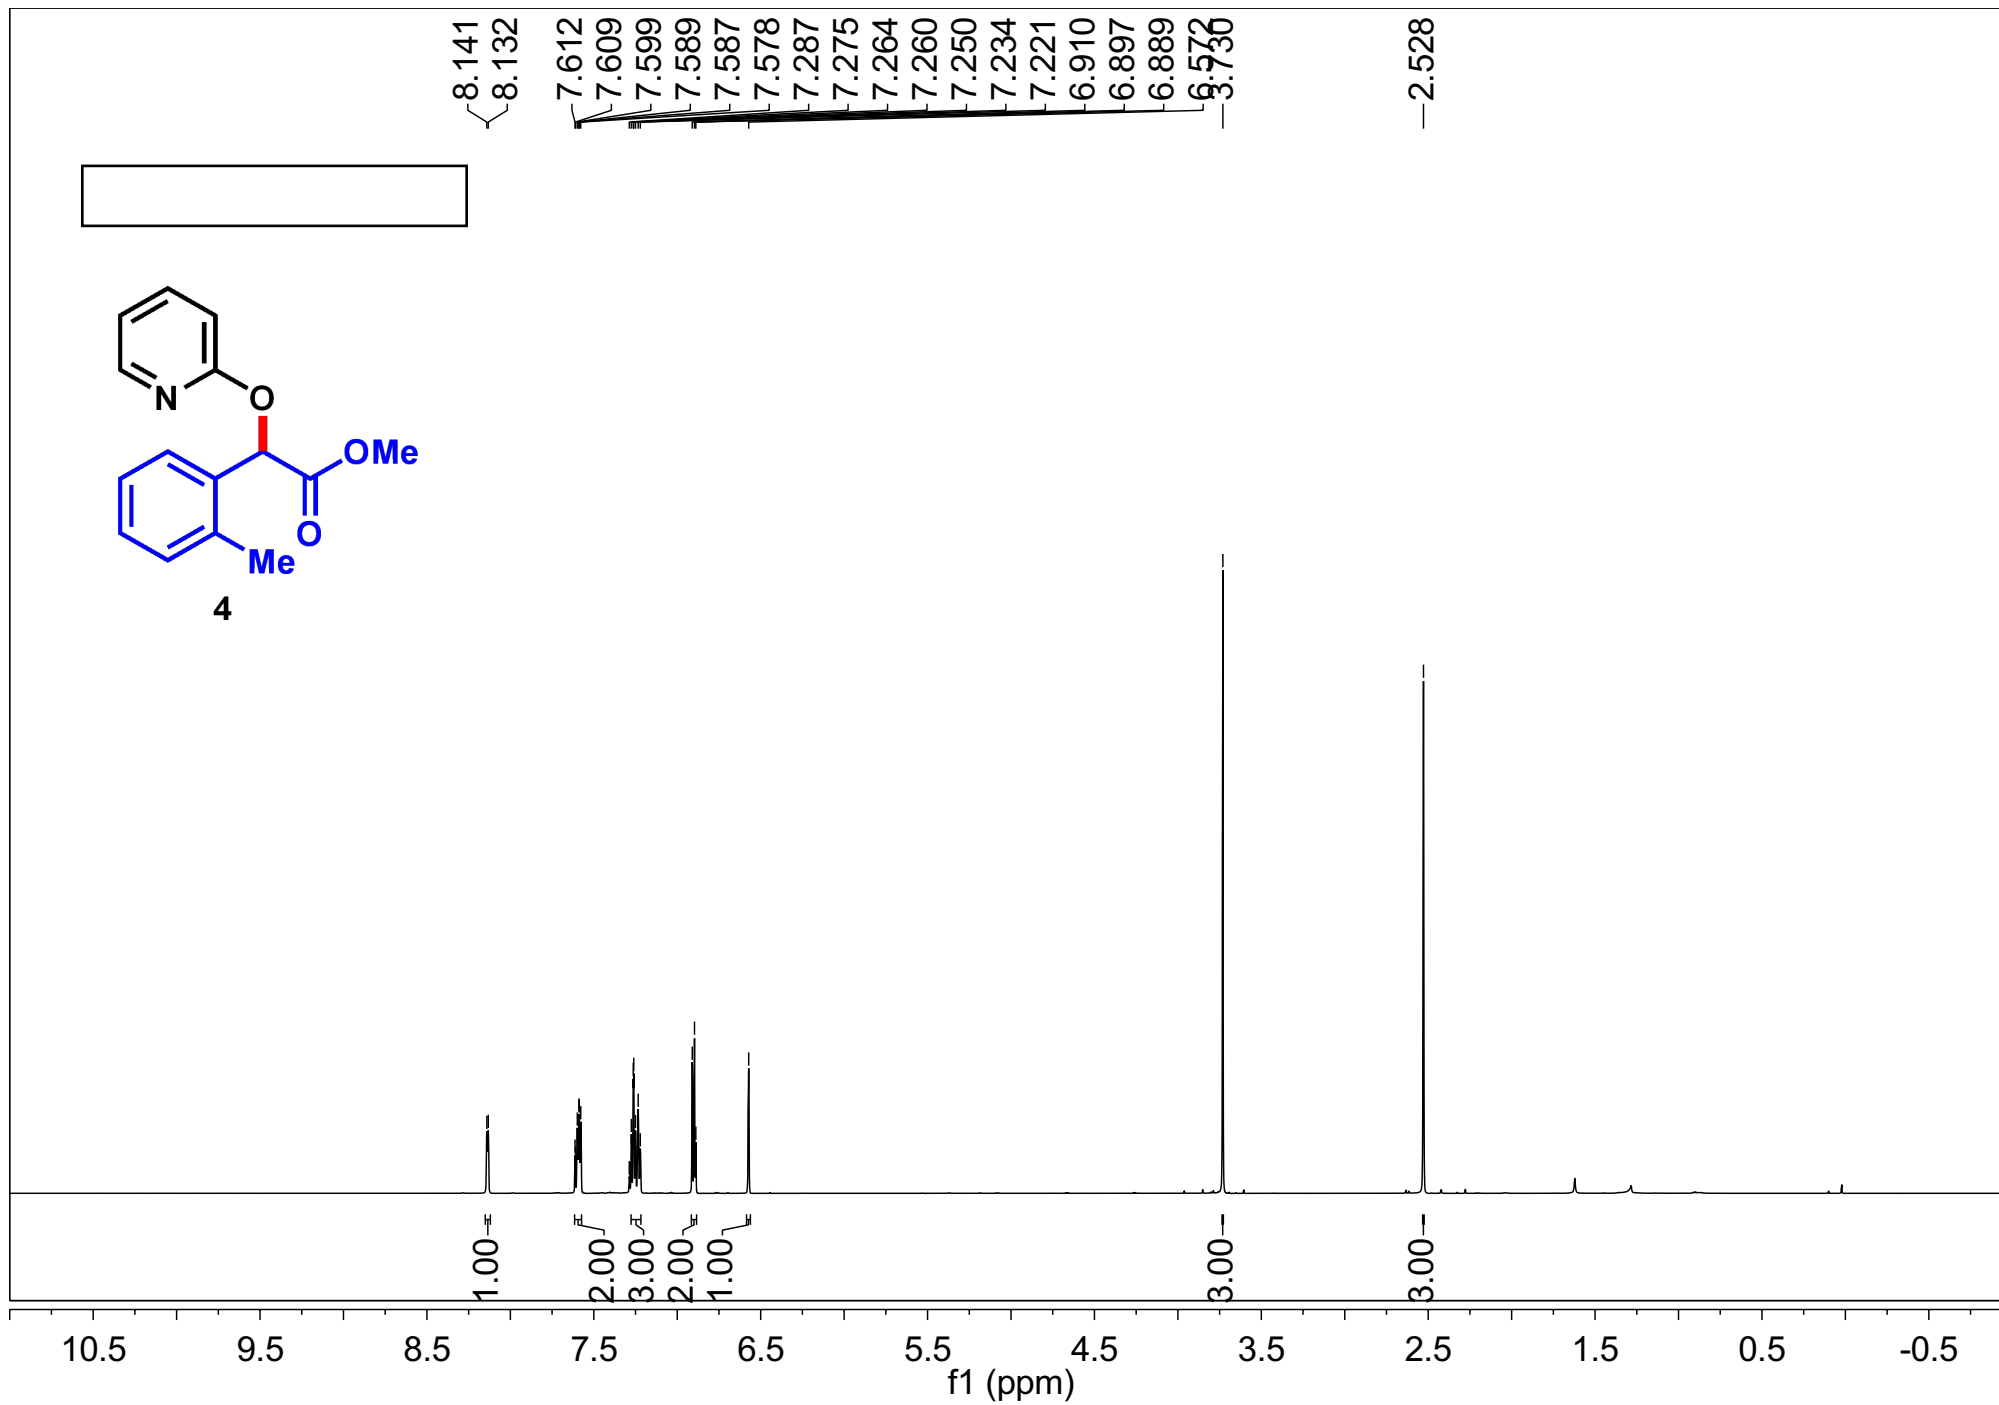



<sup>13</sup>C NMR (150 MHz, CDCl<sub>3</sub>)

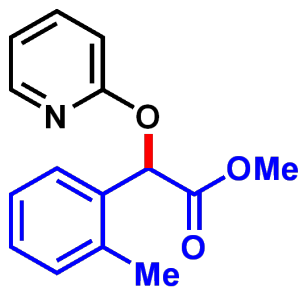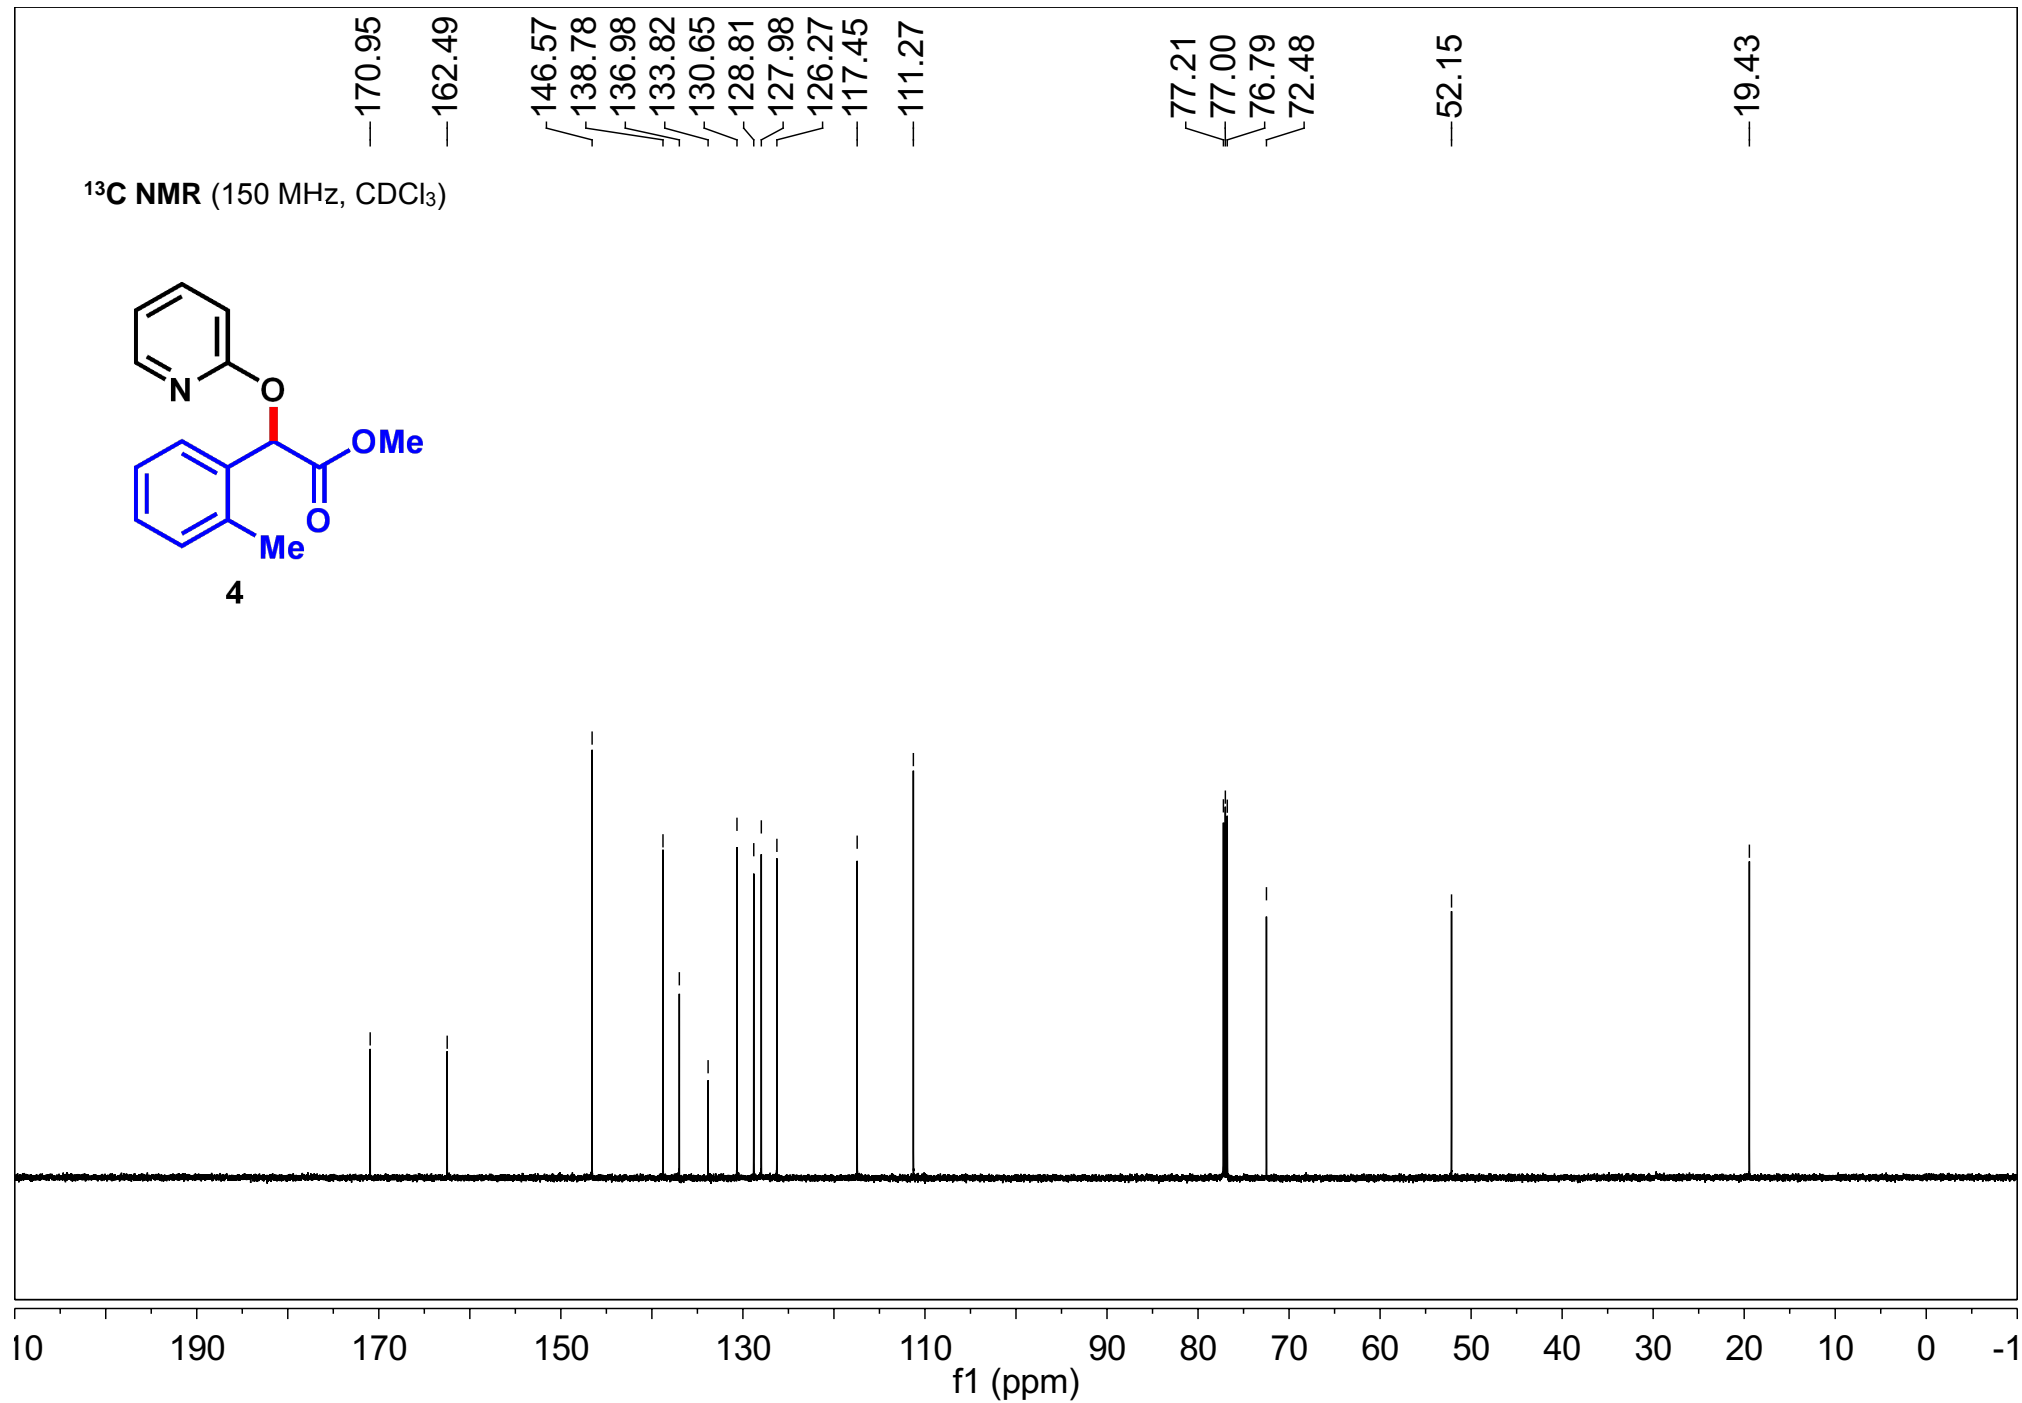

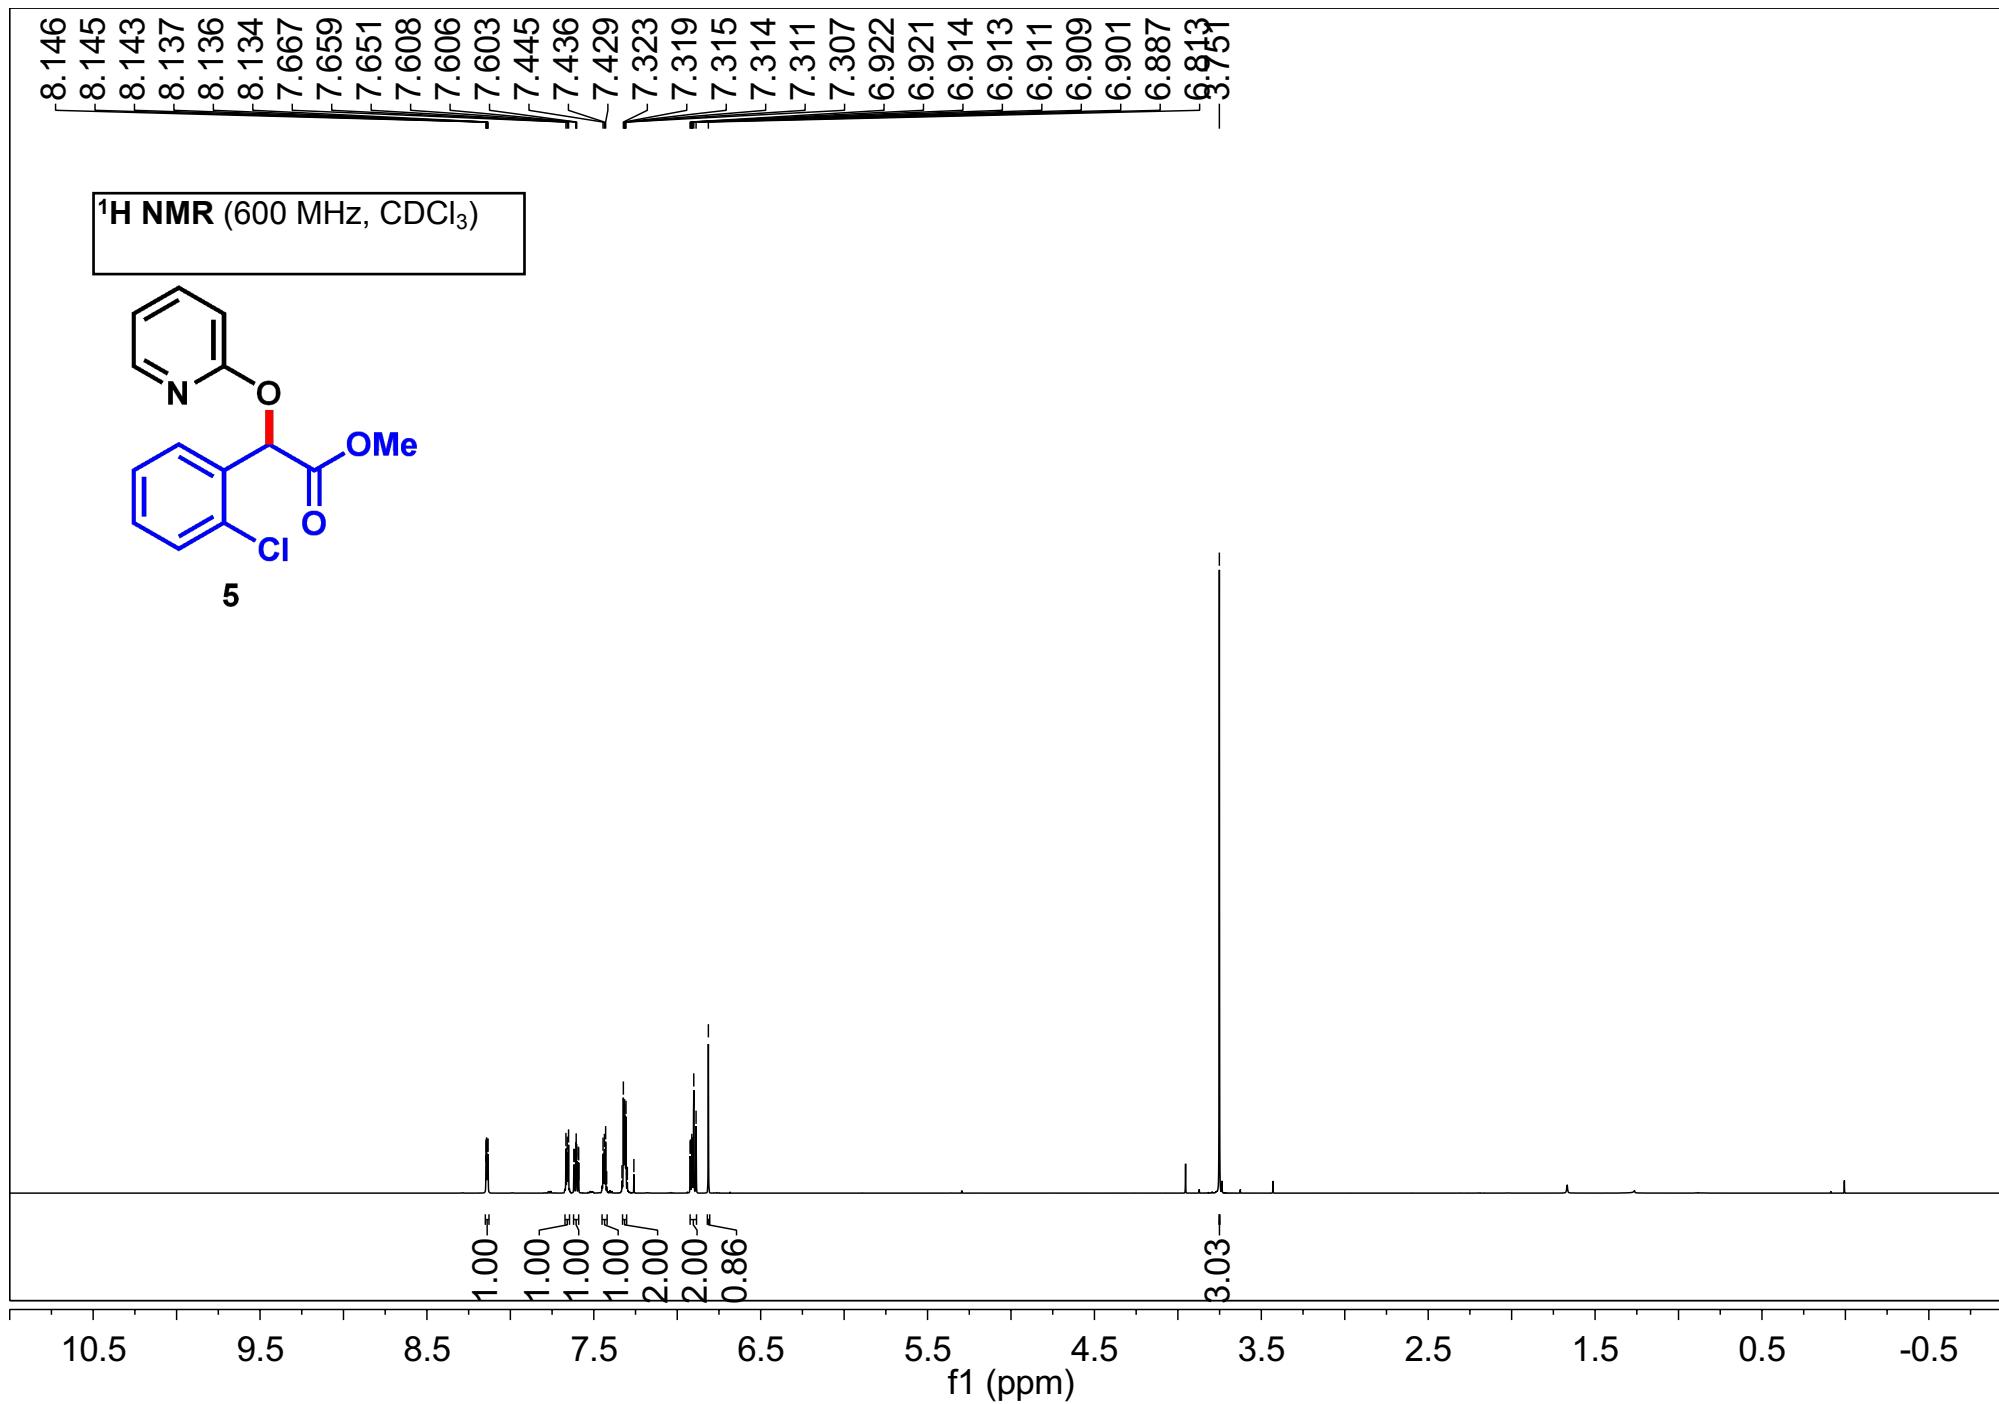

<sup>13</sup>C NMR (150 MHz, CDCl<sub>3</sub>)

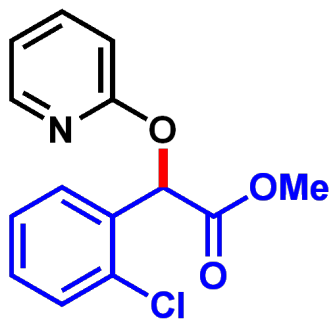

5

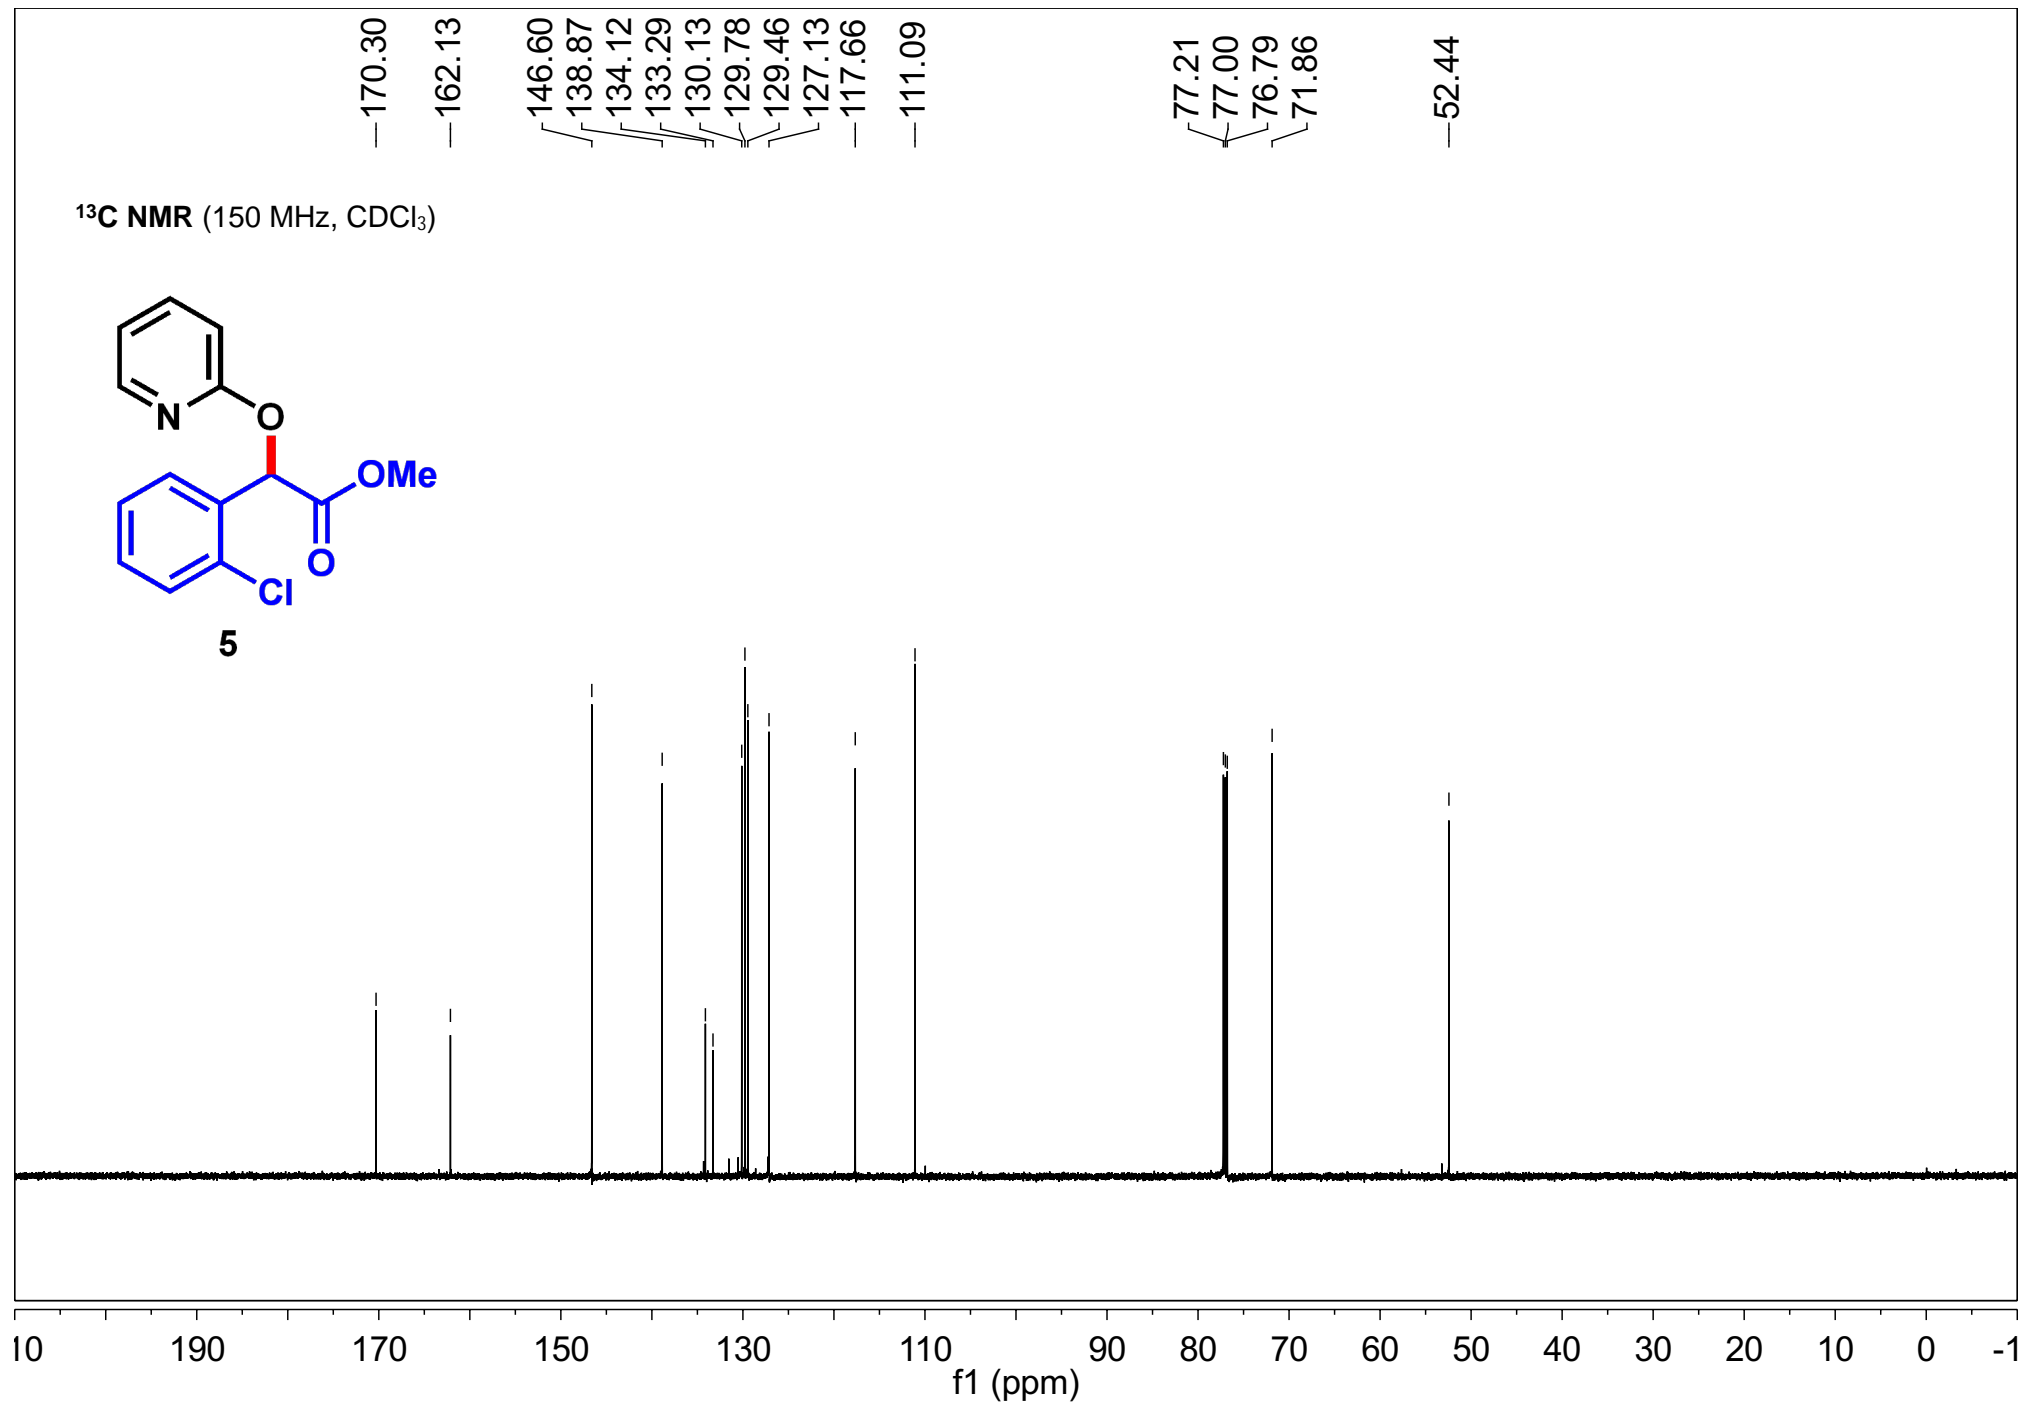

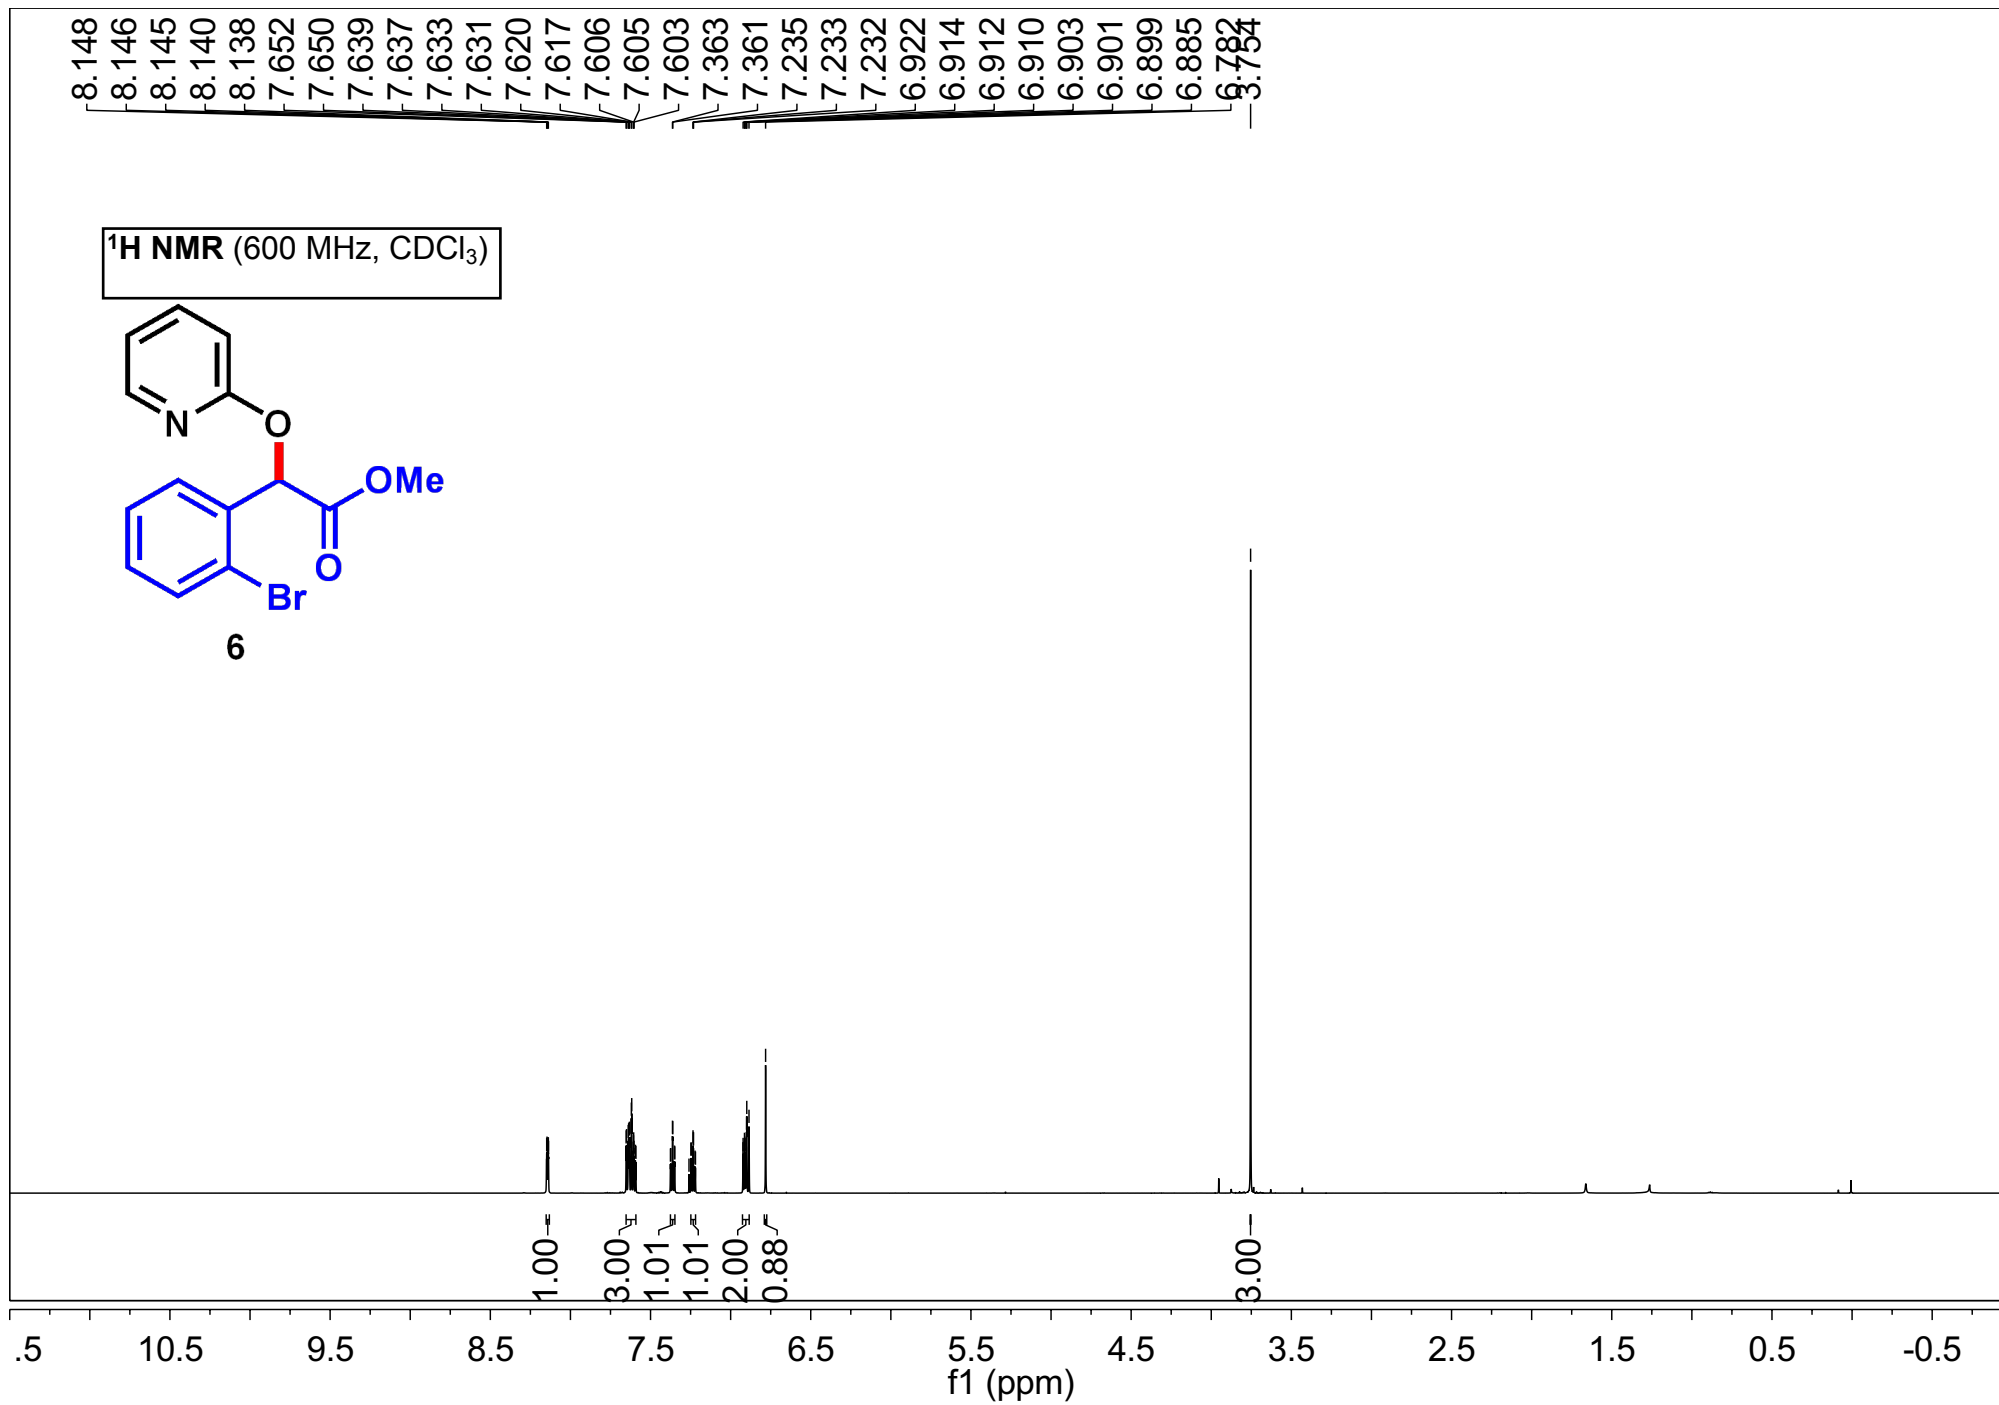

<sup>13</sup>C NMR (150 MHz, CDCl<sub>3</sub>)

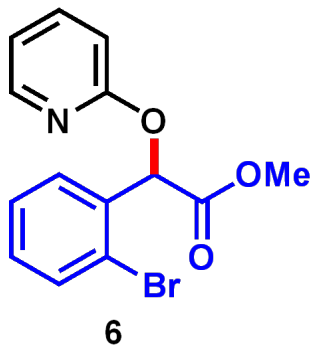

170.32  
162.11  
146.62  
138.87  
135.01  
133.10  
130.39  
129.58  
127.76  
124.30  
117.66  
111.07  
77.21  
77.00  
76.79  
74.28  
52.44

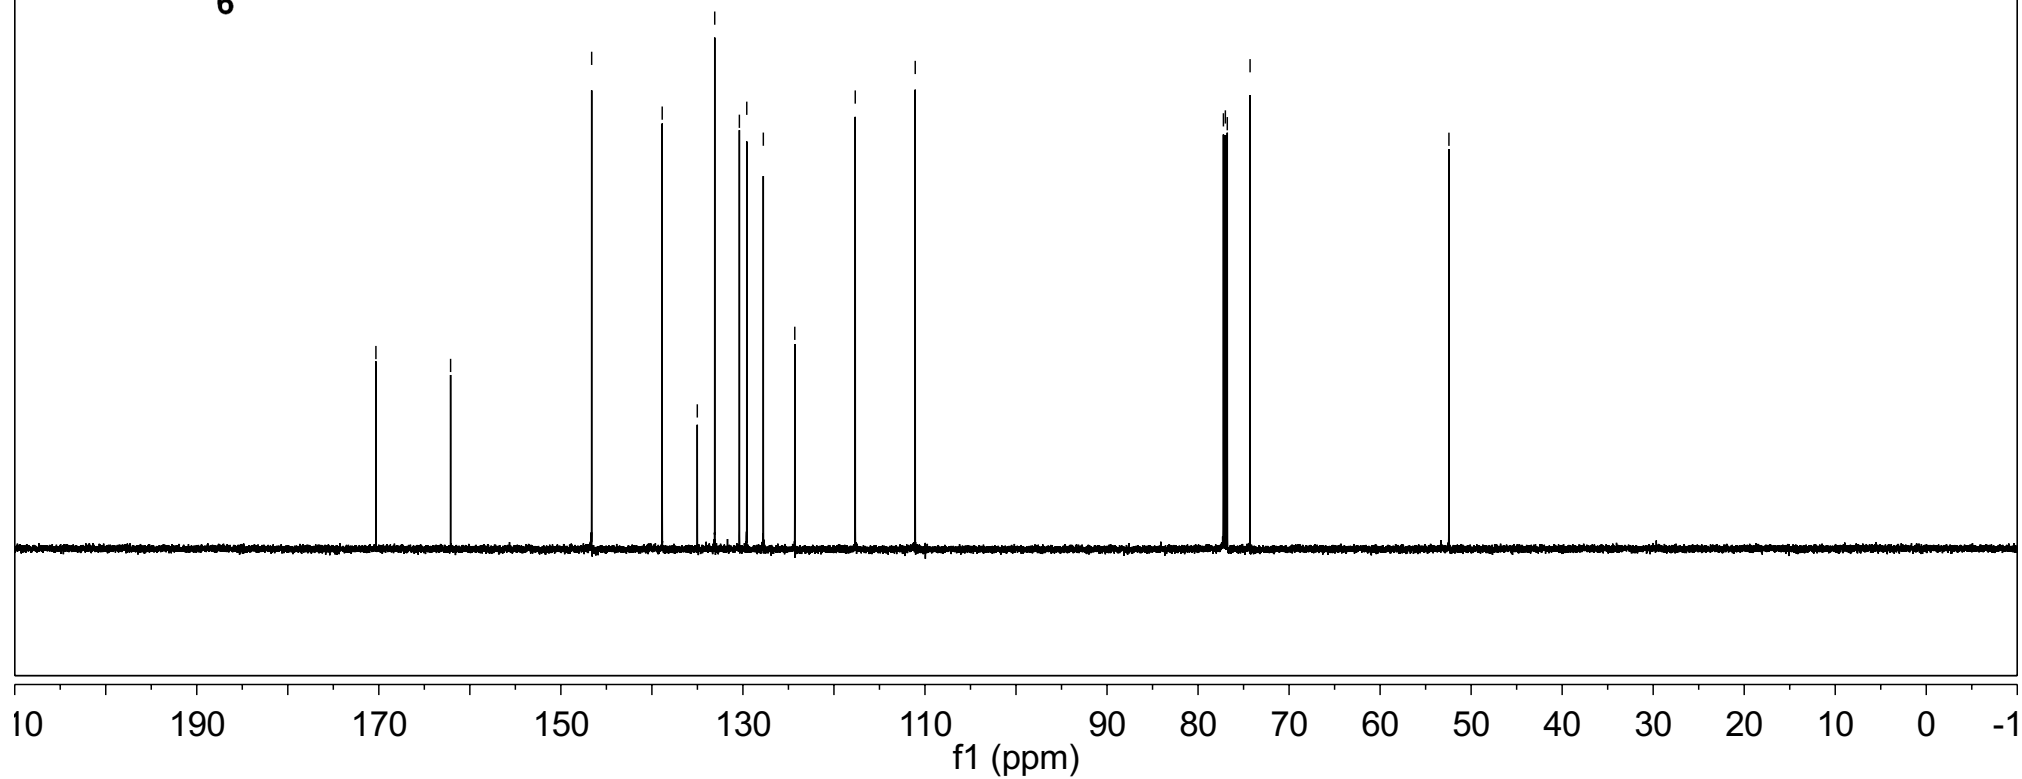

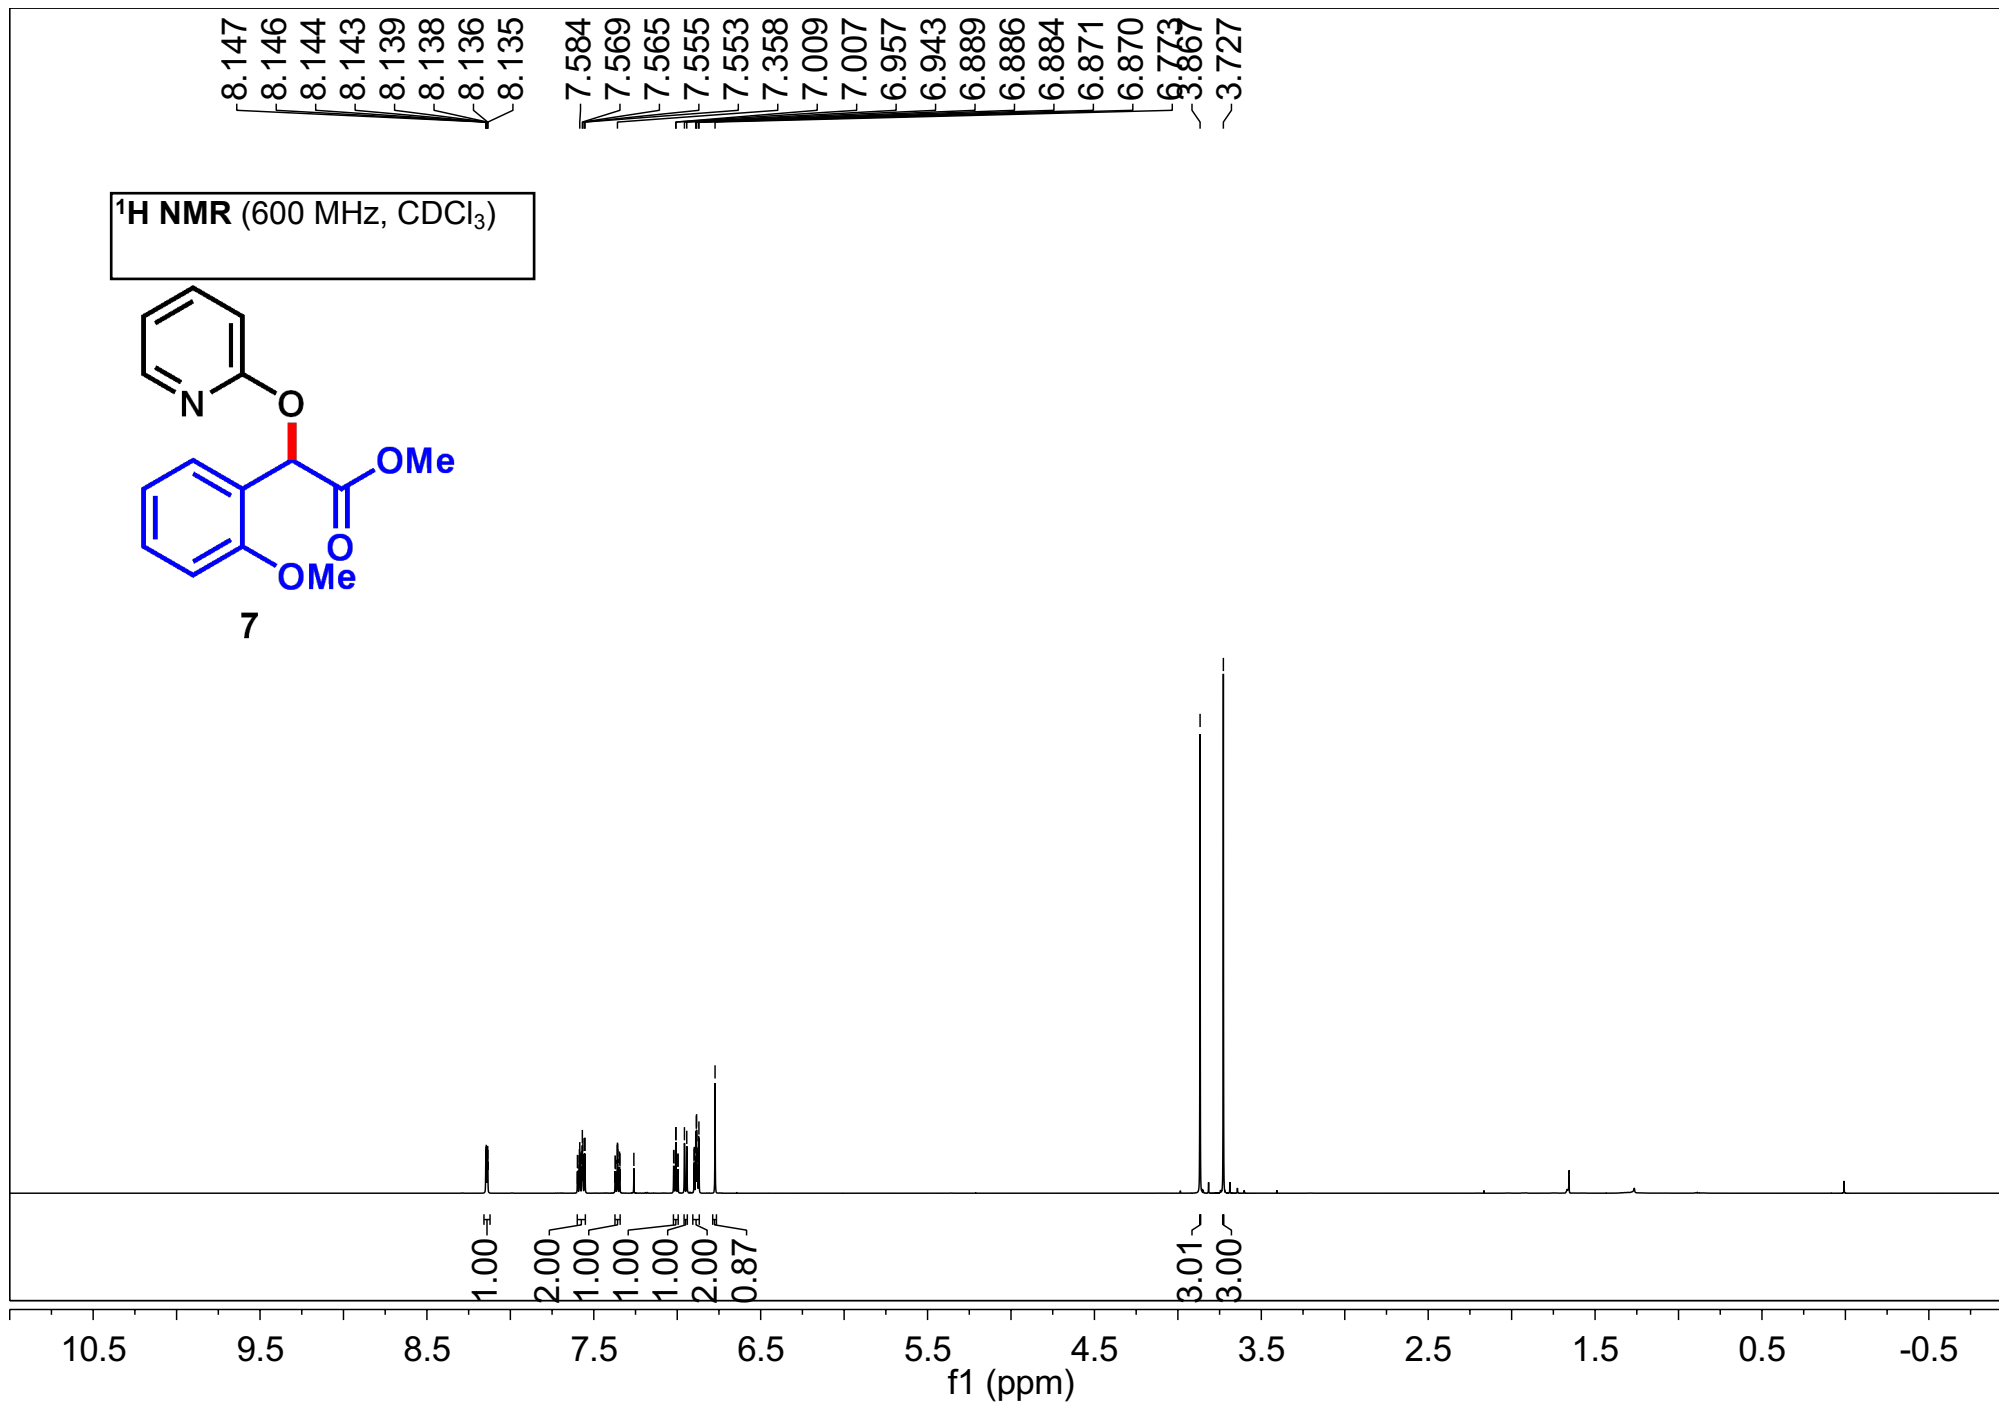

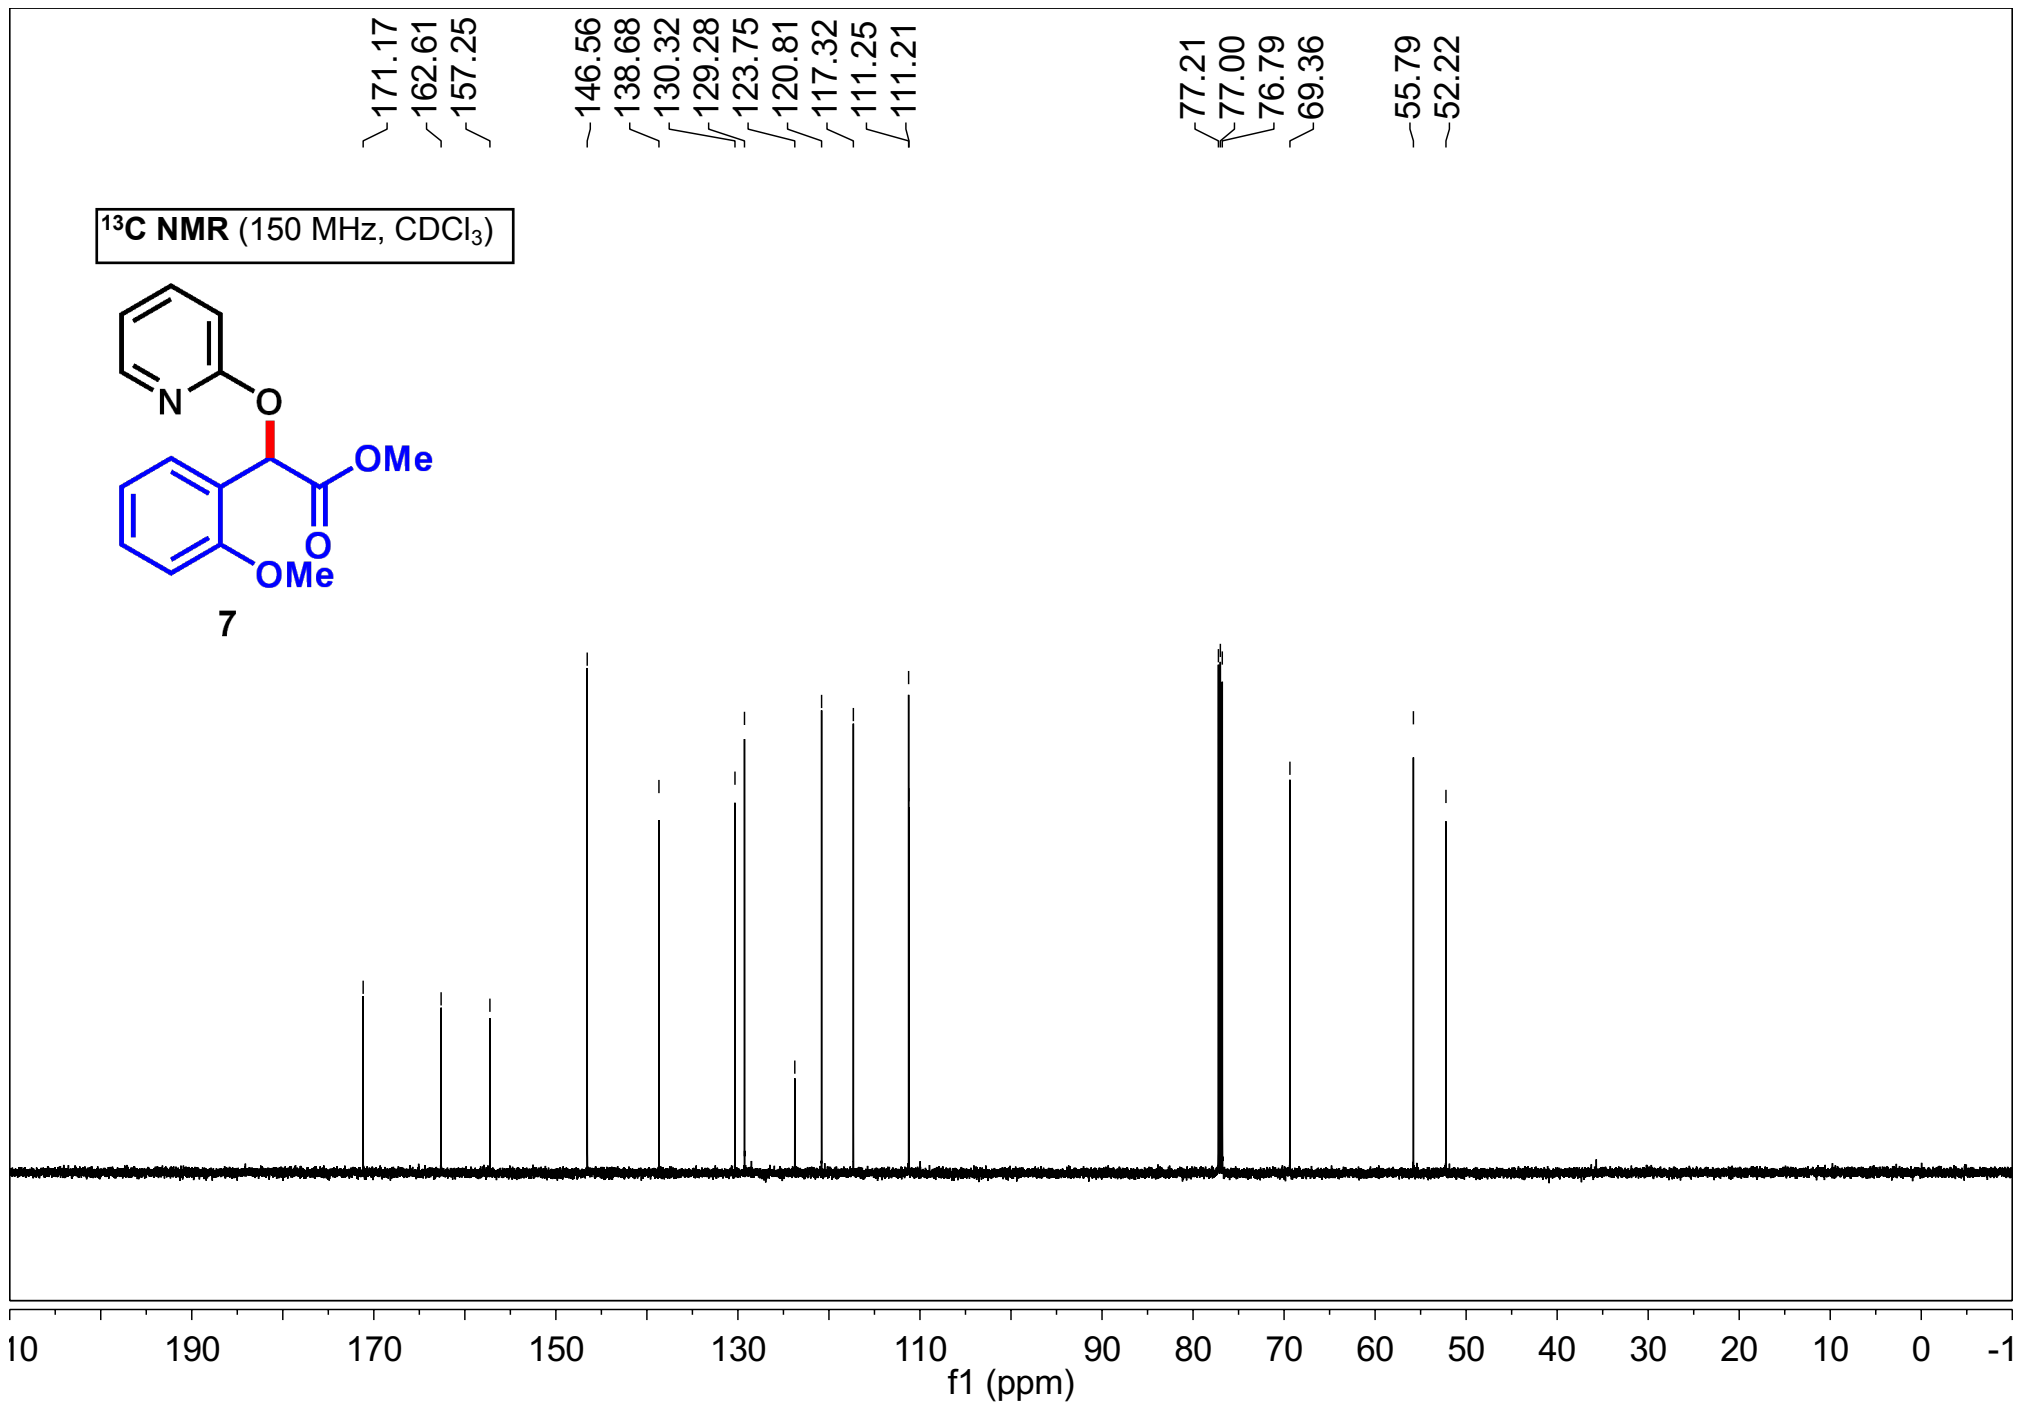

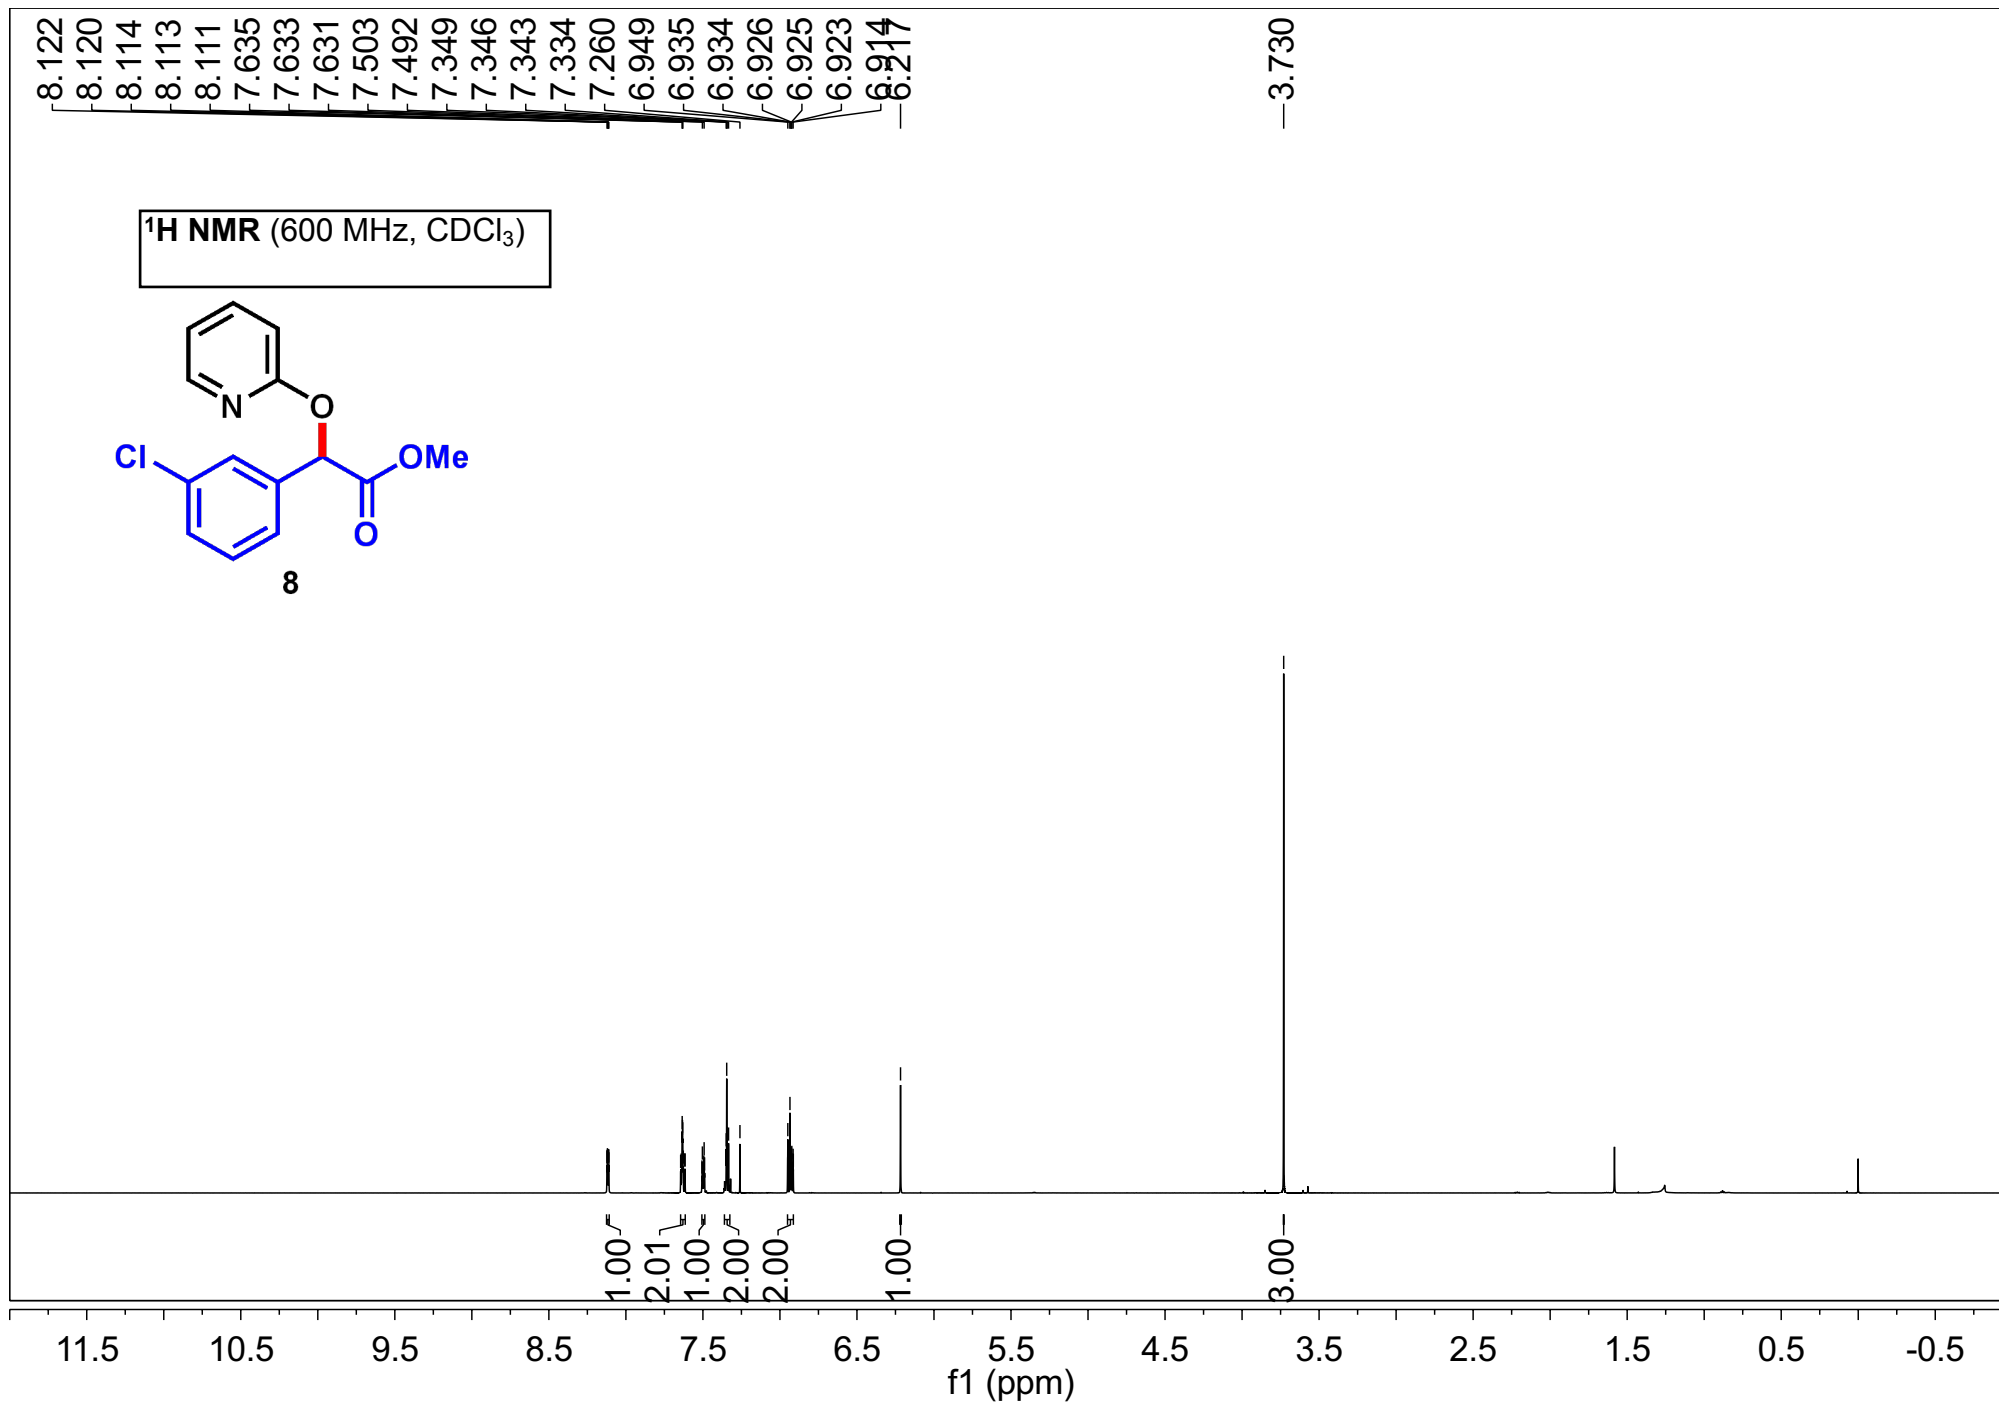



**<sup>13</sup>C NMR (150 MHz, CDCl<sub>3</sub>)**

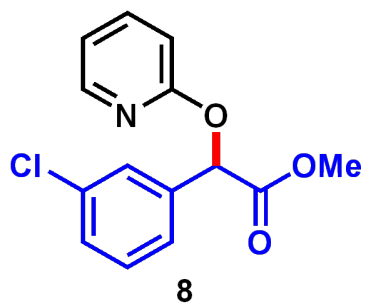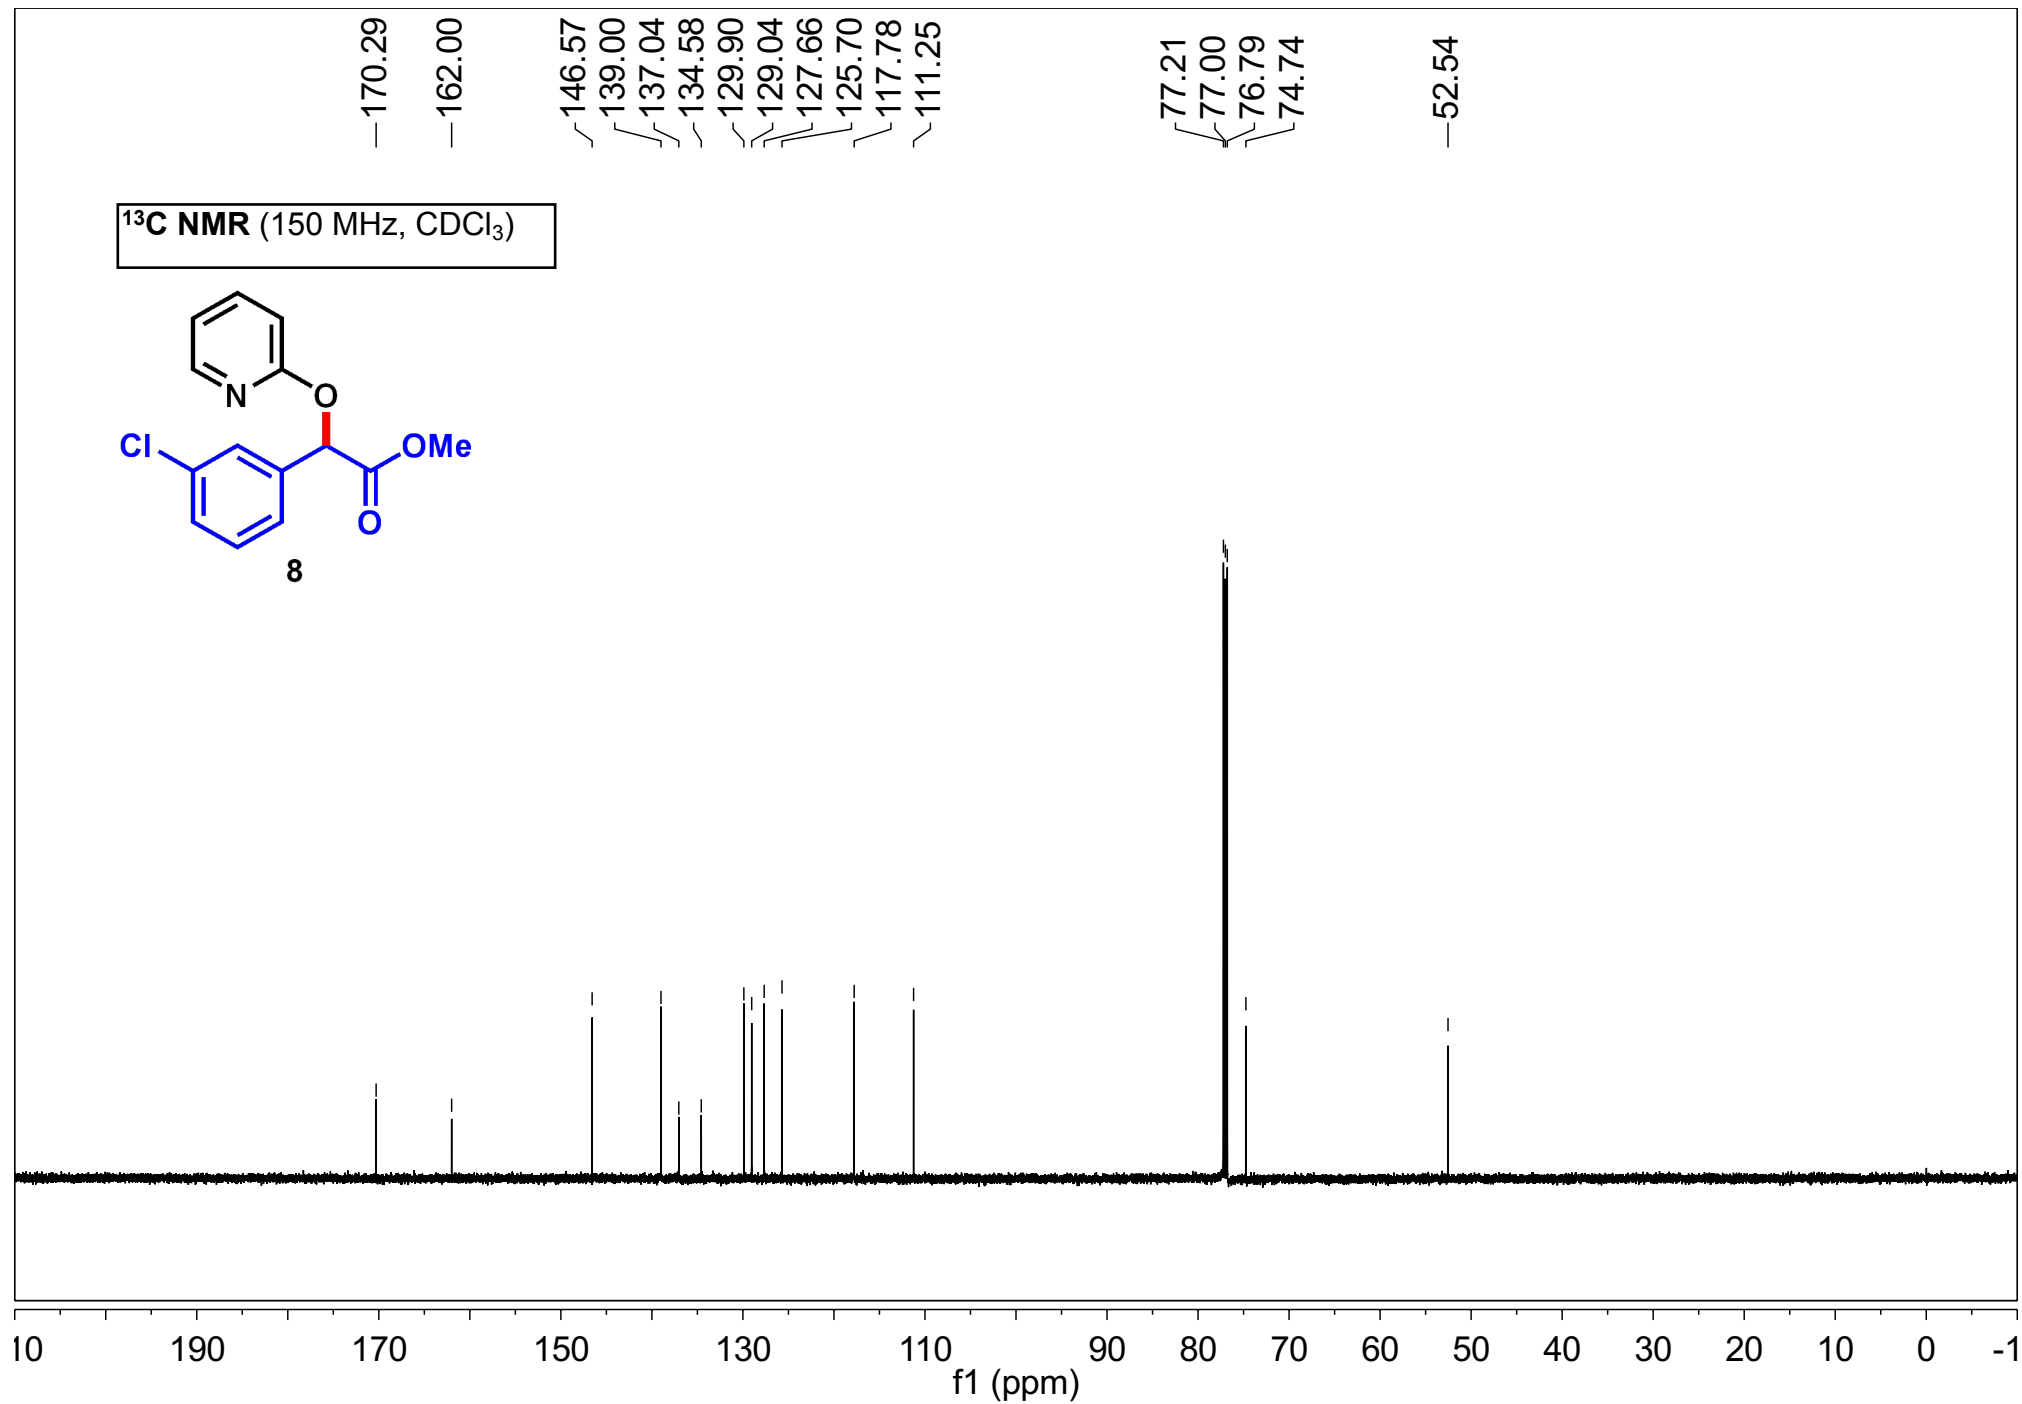

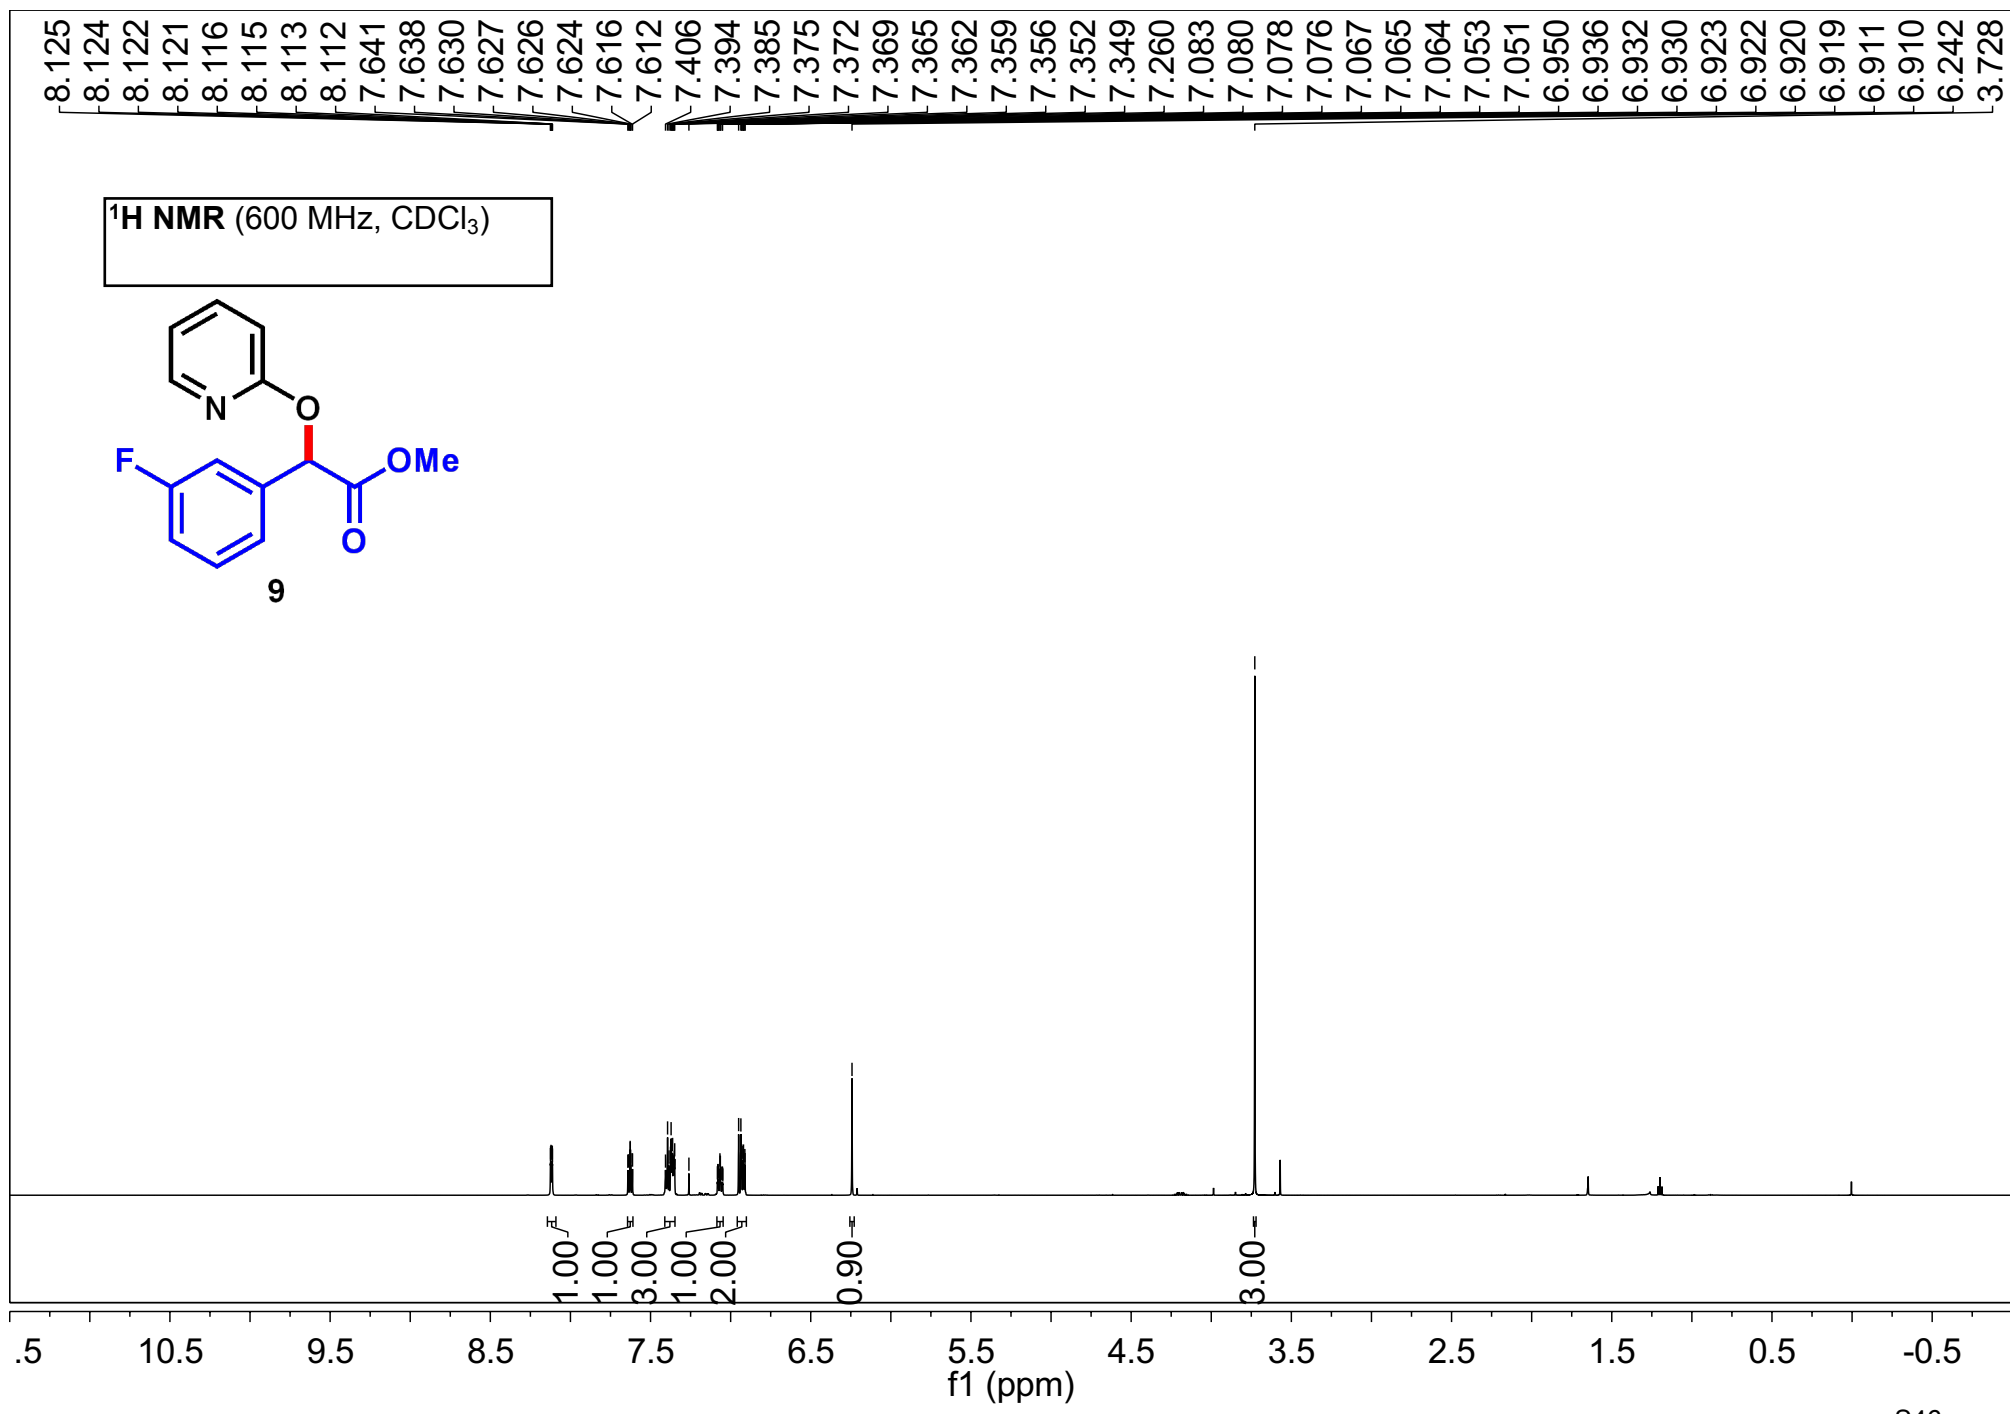

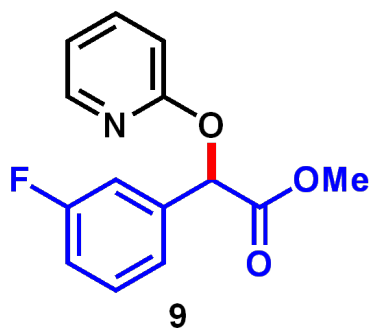

<sup>13</sup>C NMR (150 MHz, CDCl<sub>3</sub>)

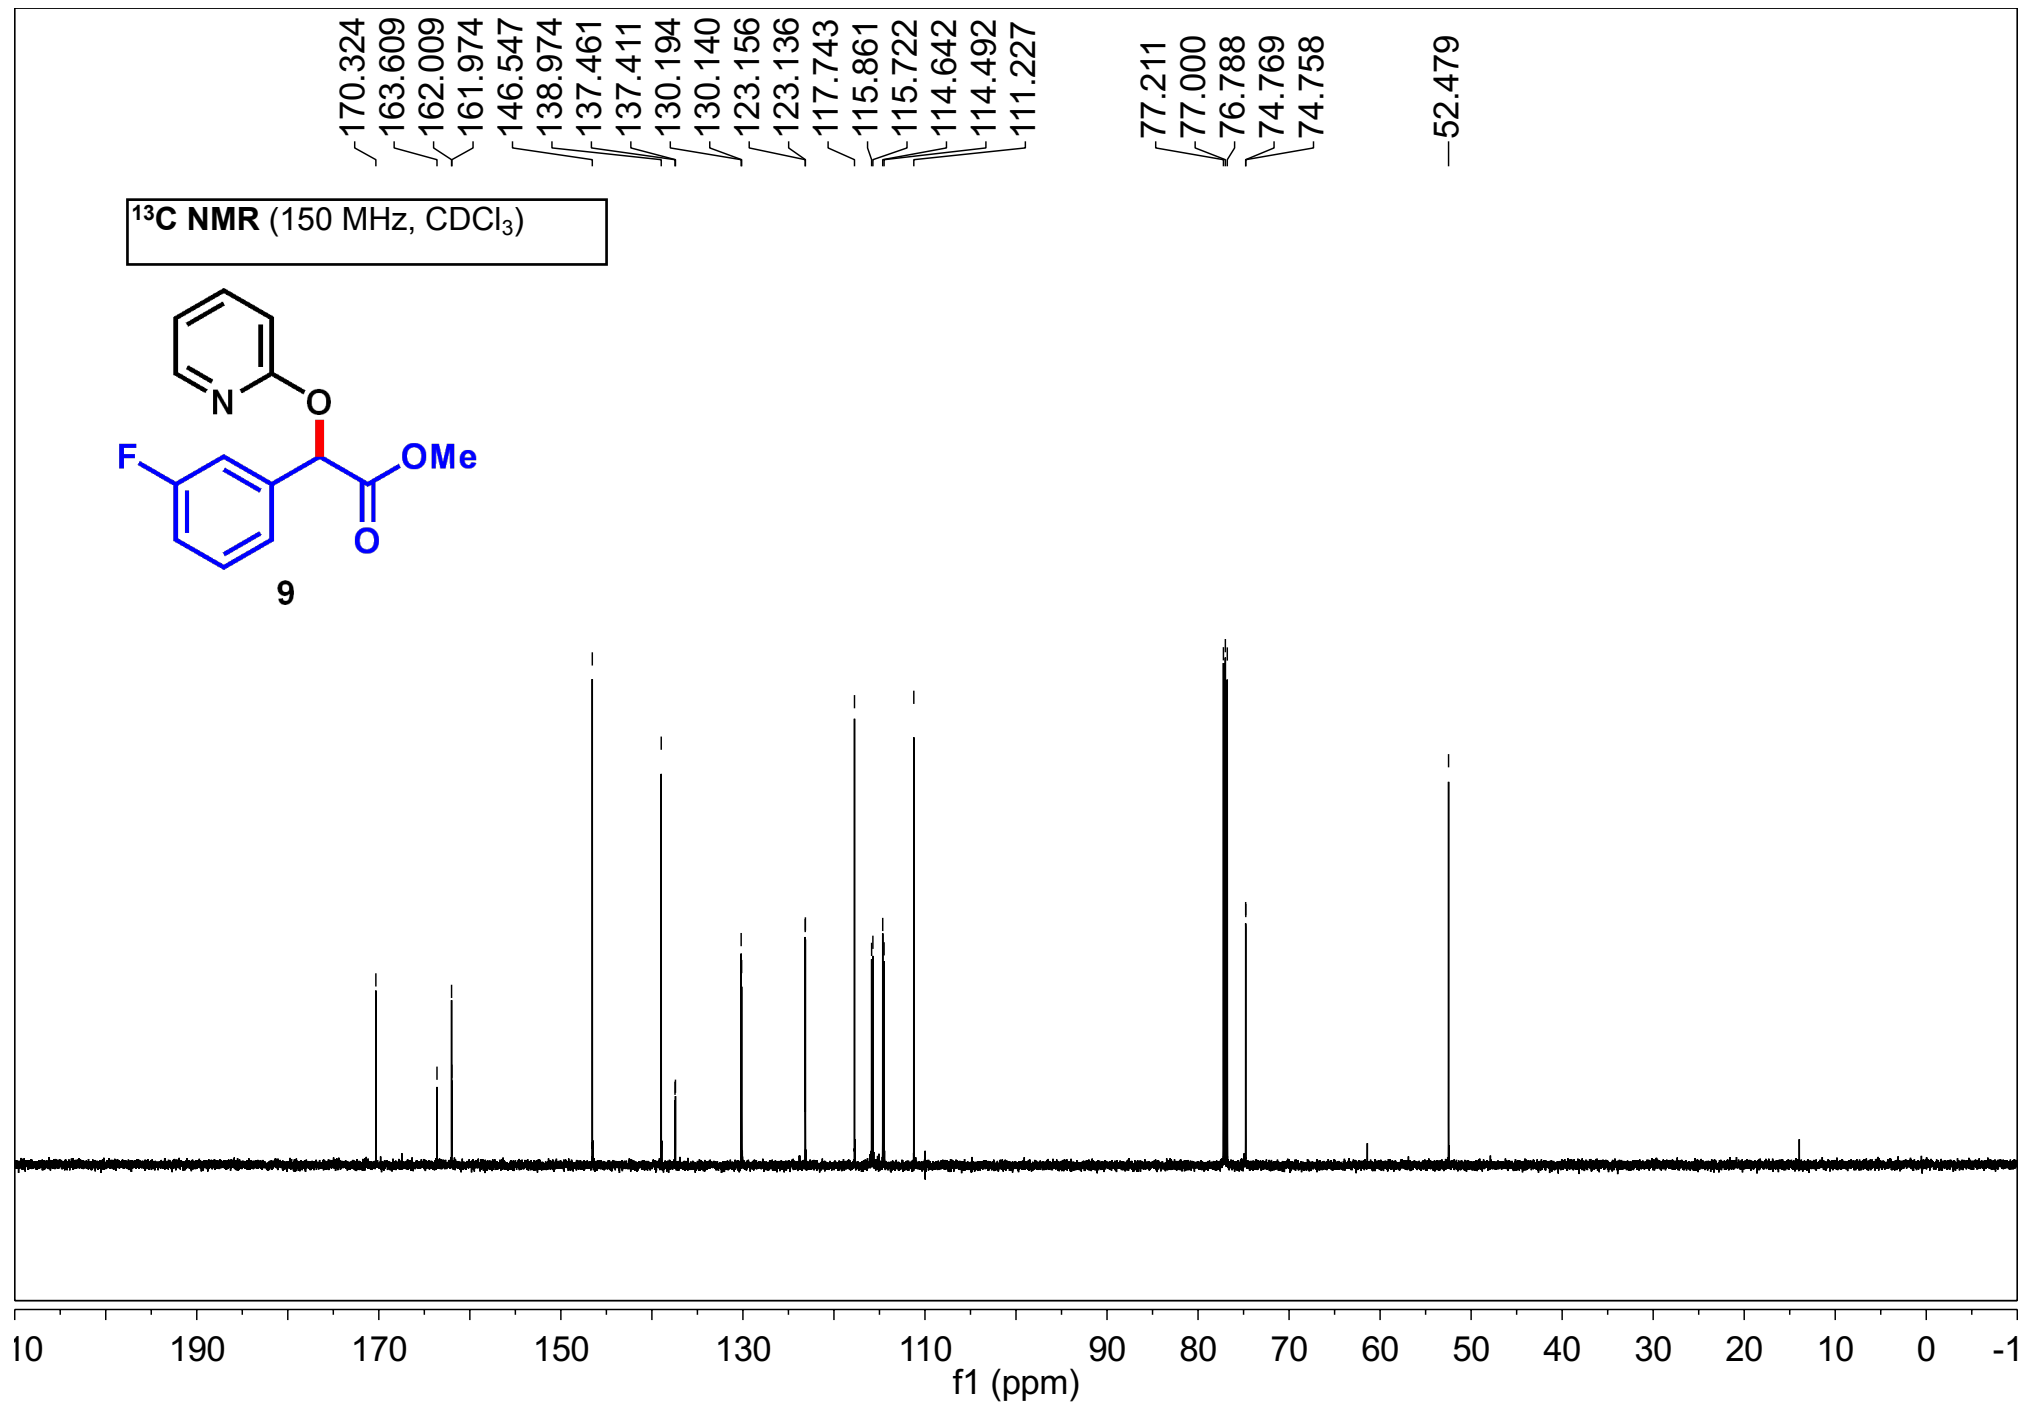

**<sup>19</sup>F NMR** (376 MHz, CDCl<sub>3</sub>)

-117.855  
-117.869  
-117.878  
-117.893  
-117.903  
-117.918

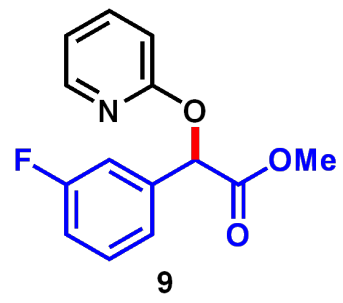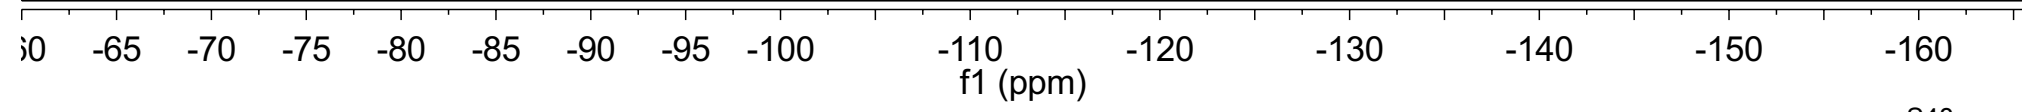

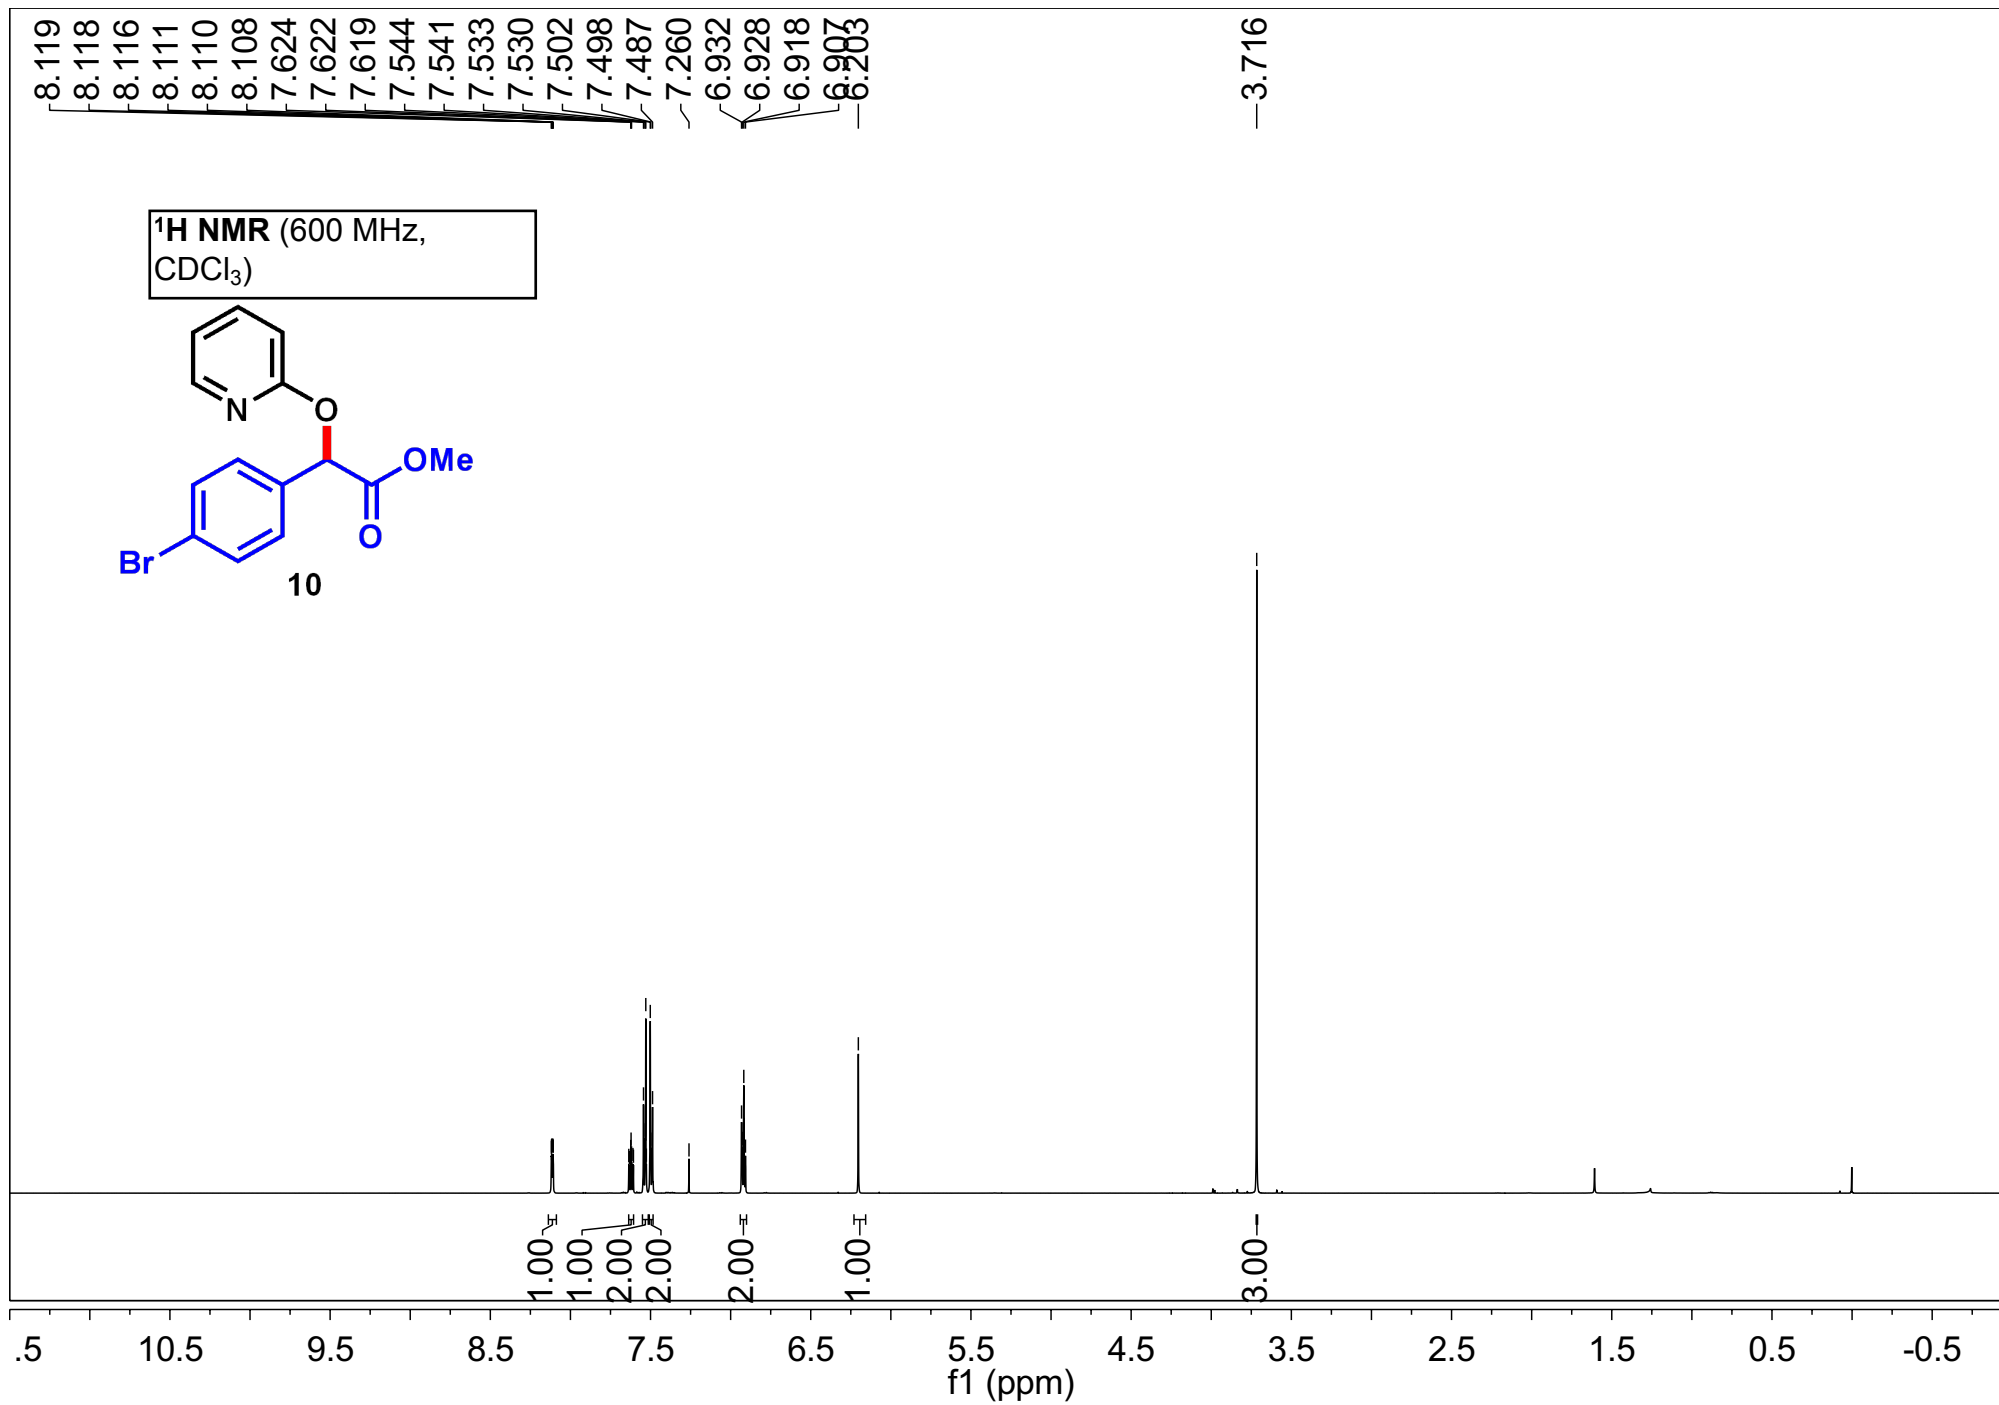

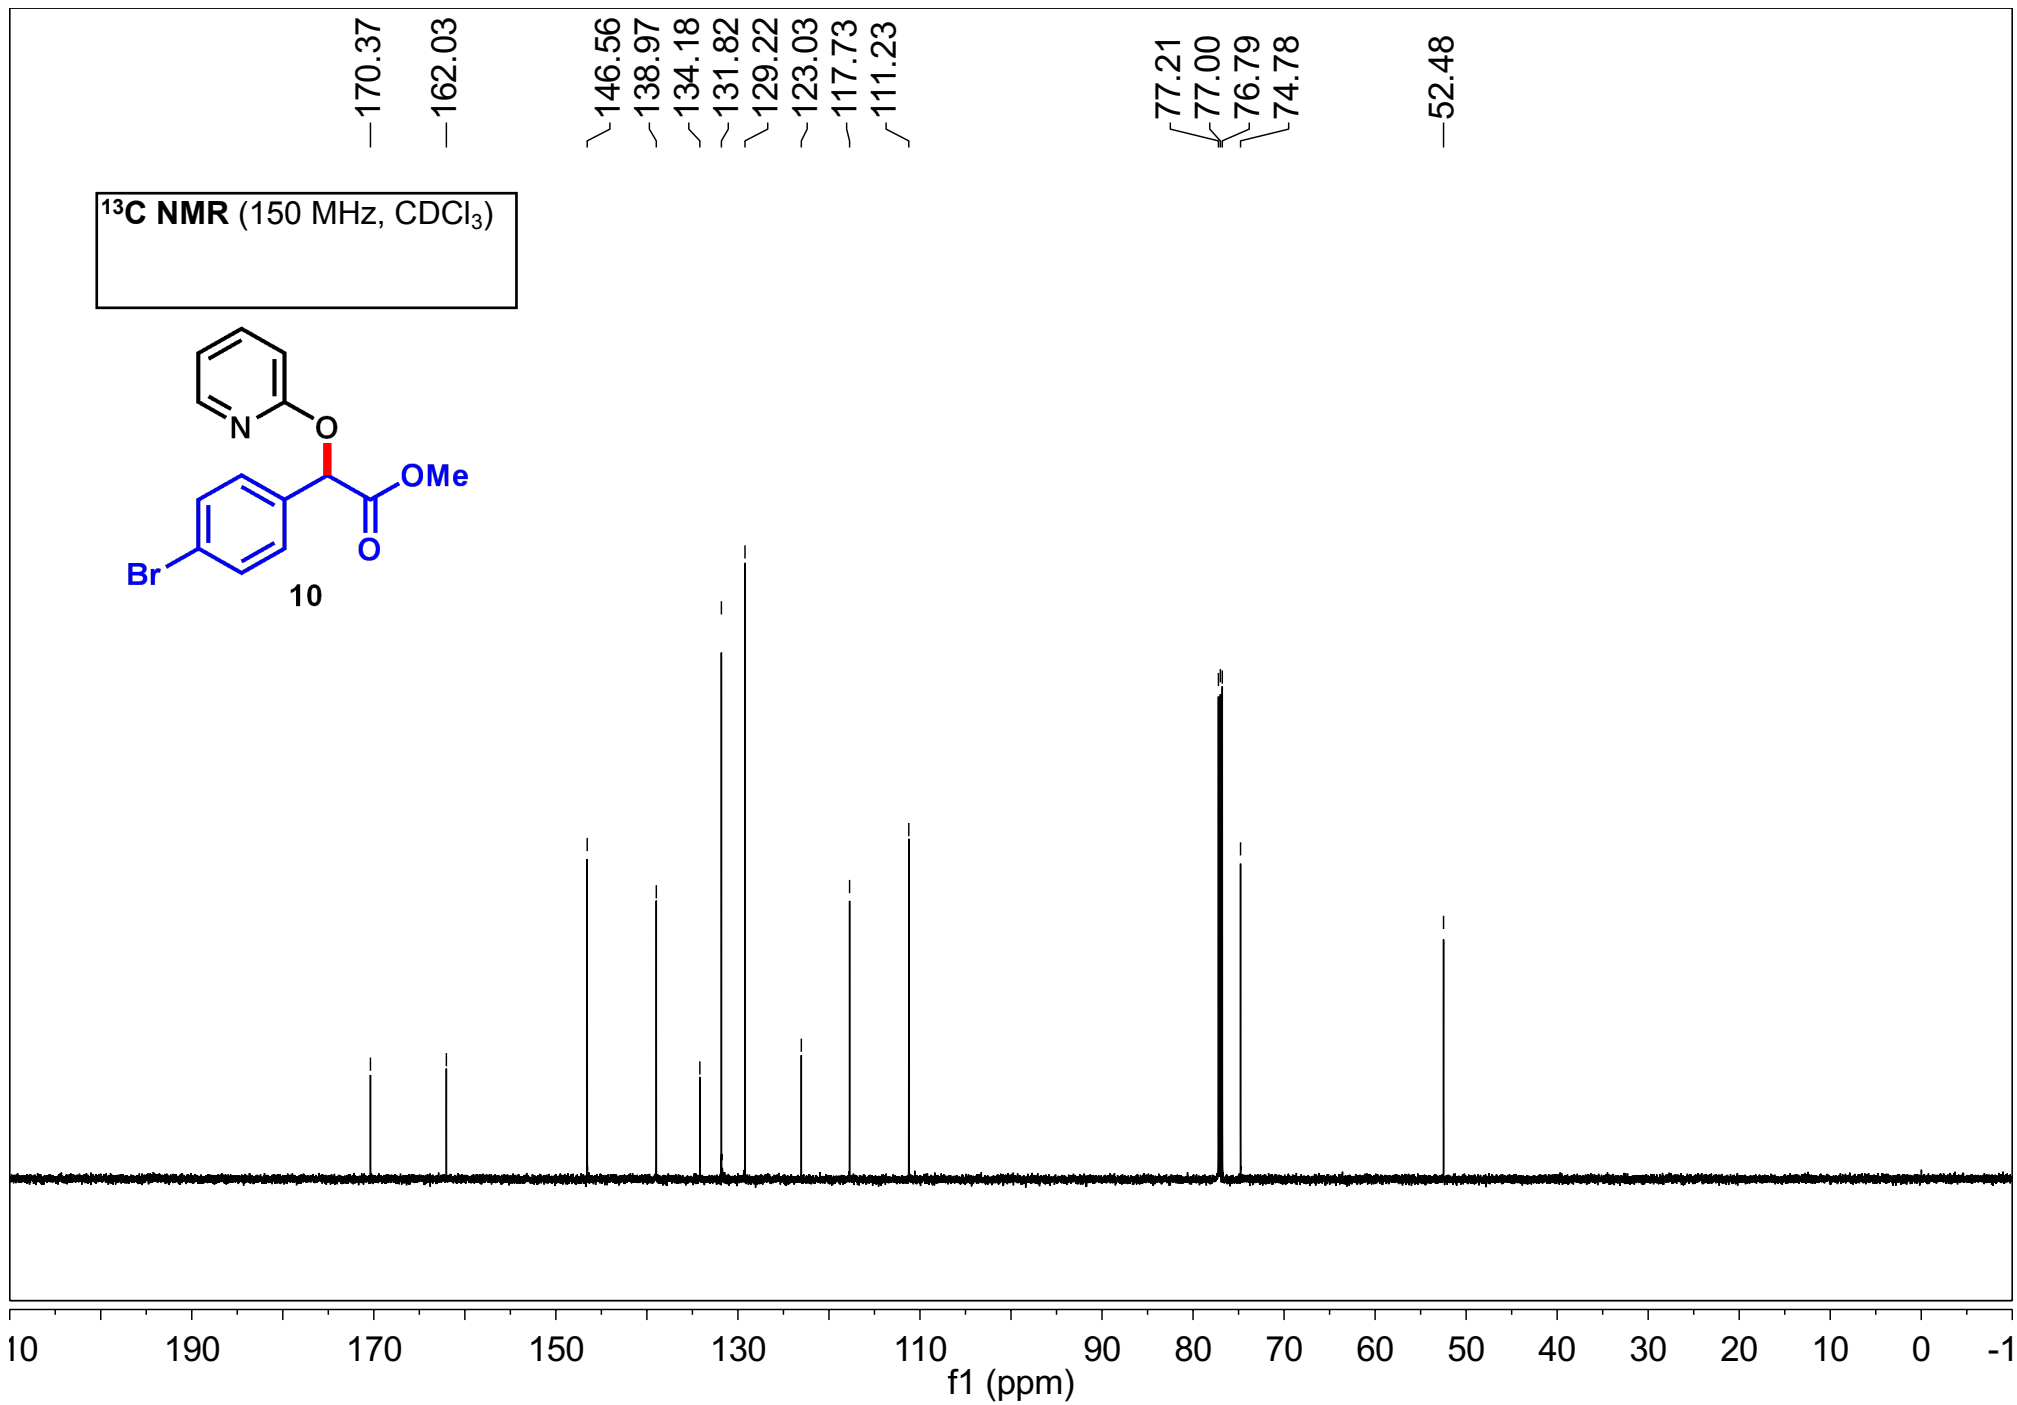

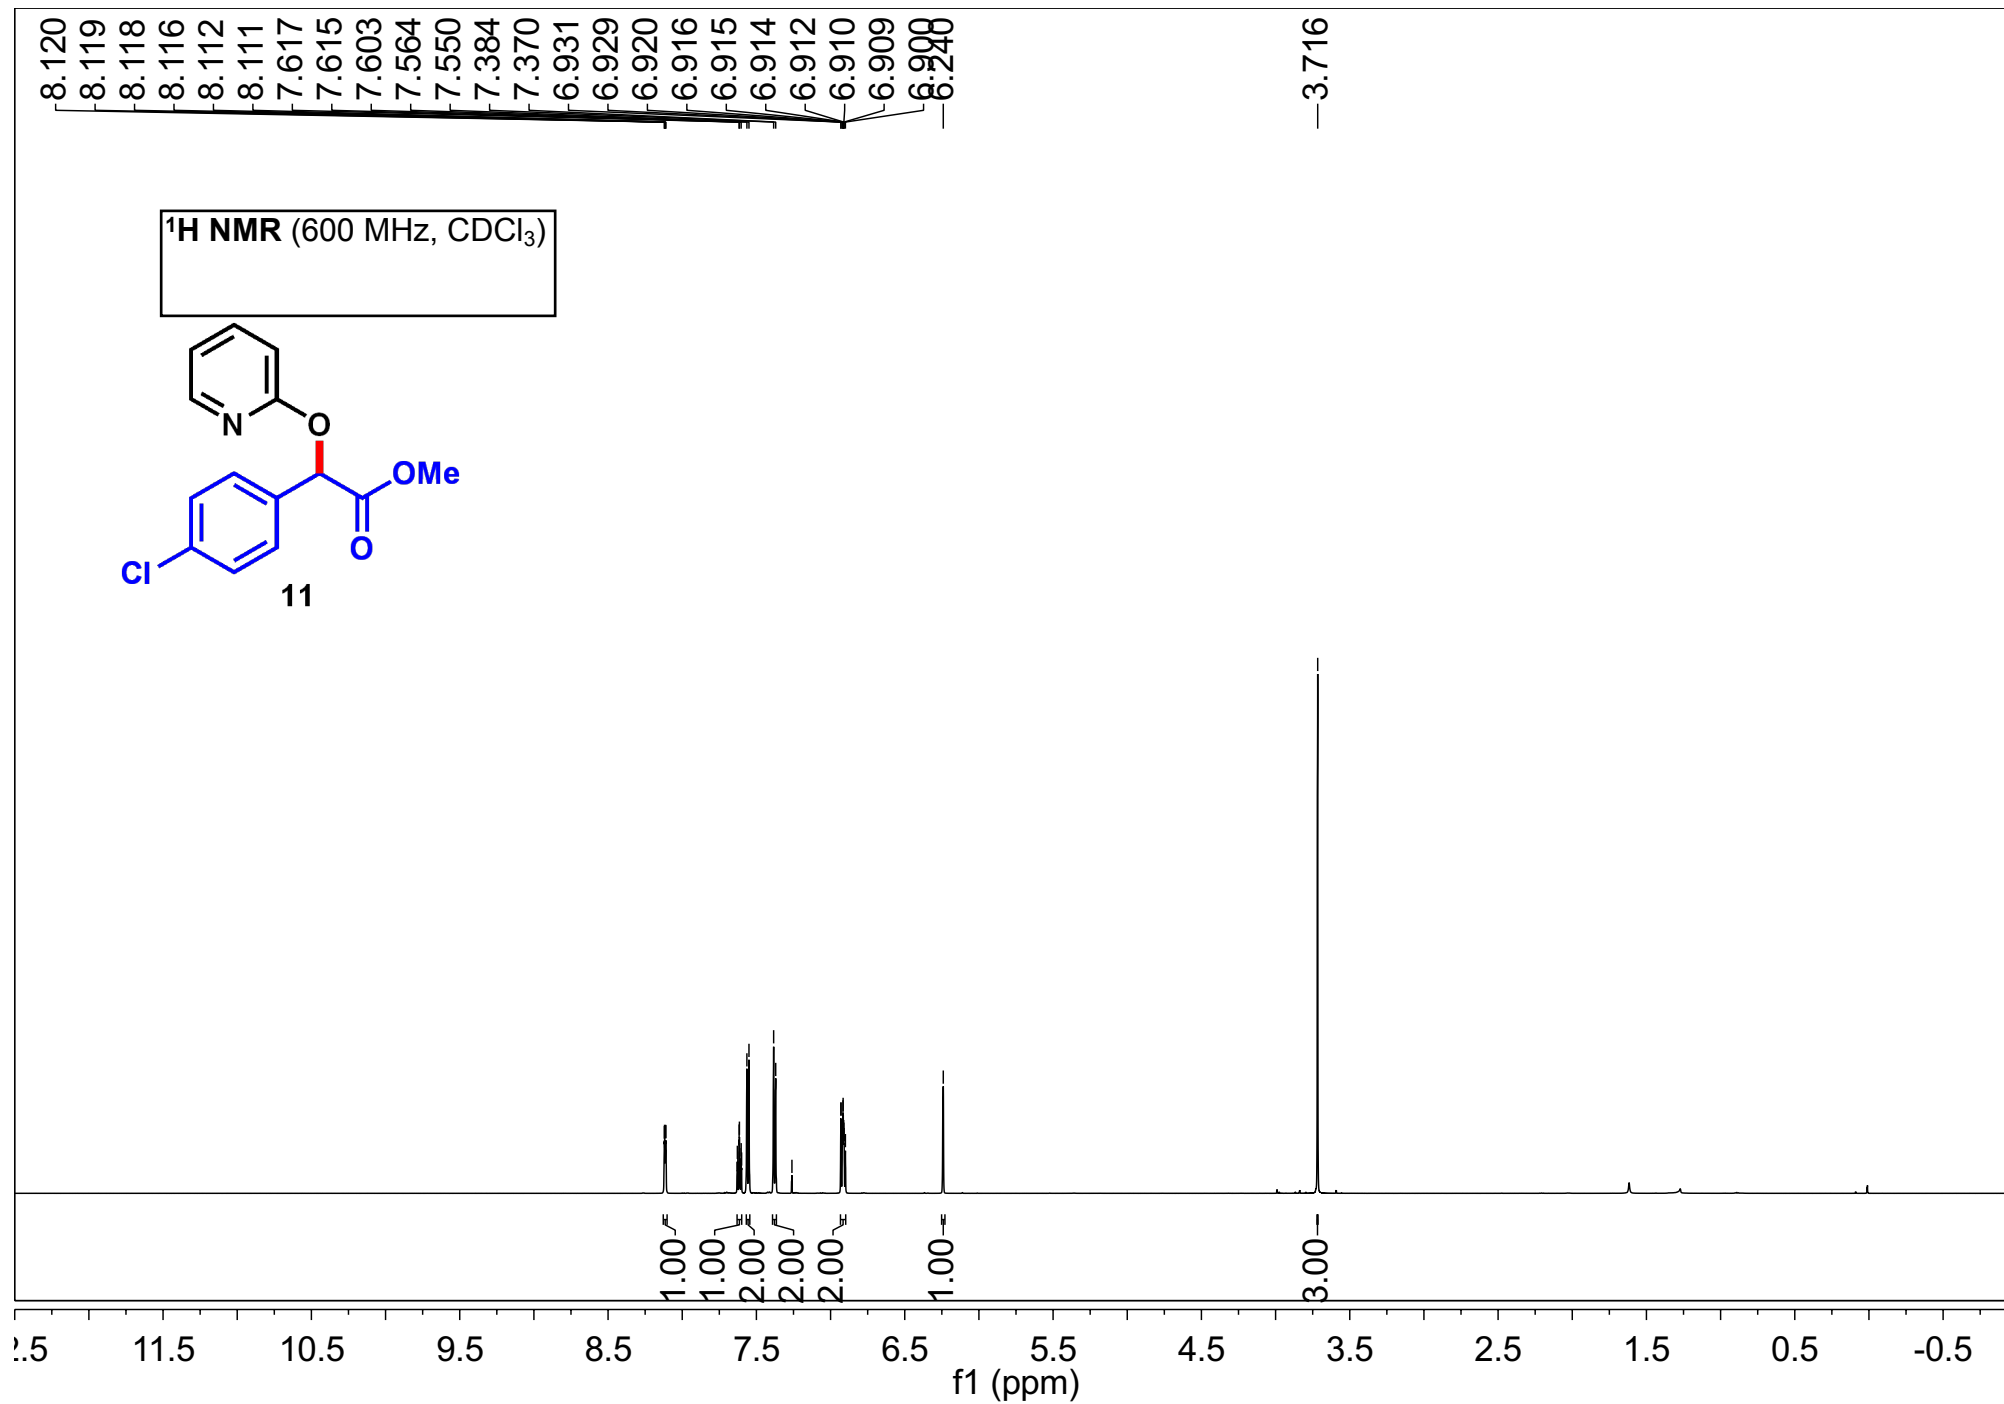

**<sup>13</sup>C NMR (150 MHz, CDCl<sub>3</sub>)**

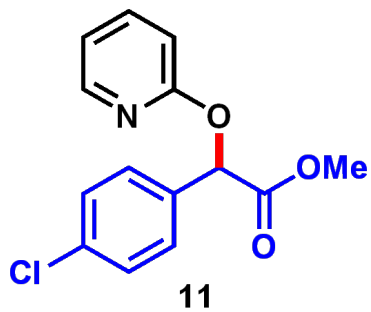

—170.39  
—162.13  
146.57  
138.92  
134.85  
133.80  
128.94  
128.85  
—117.69  
—111.24  
77.21  
77.00  
76.79  
74.78  
—52.37

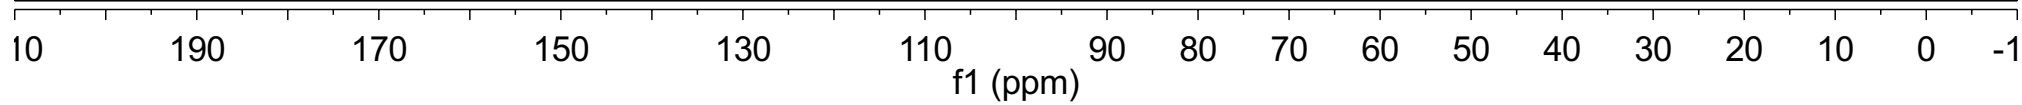



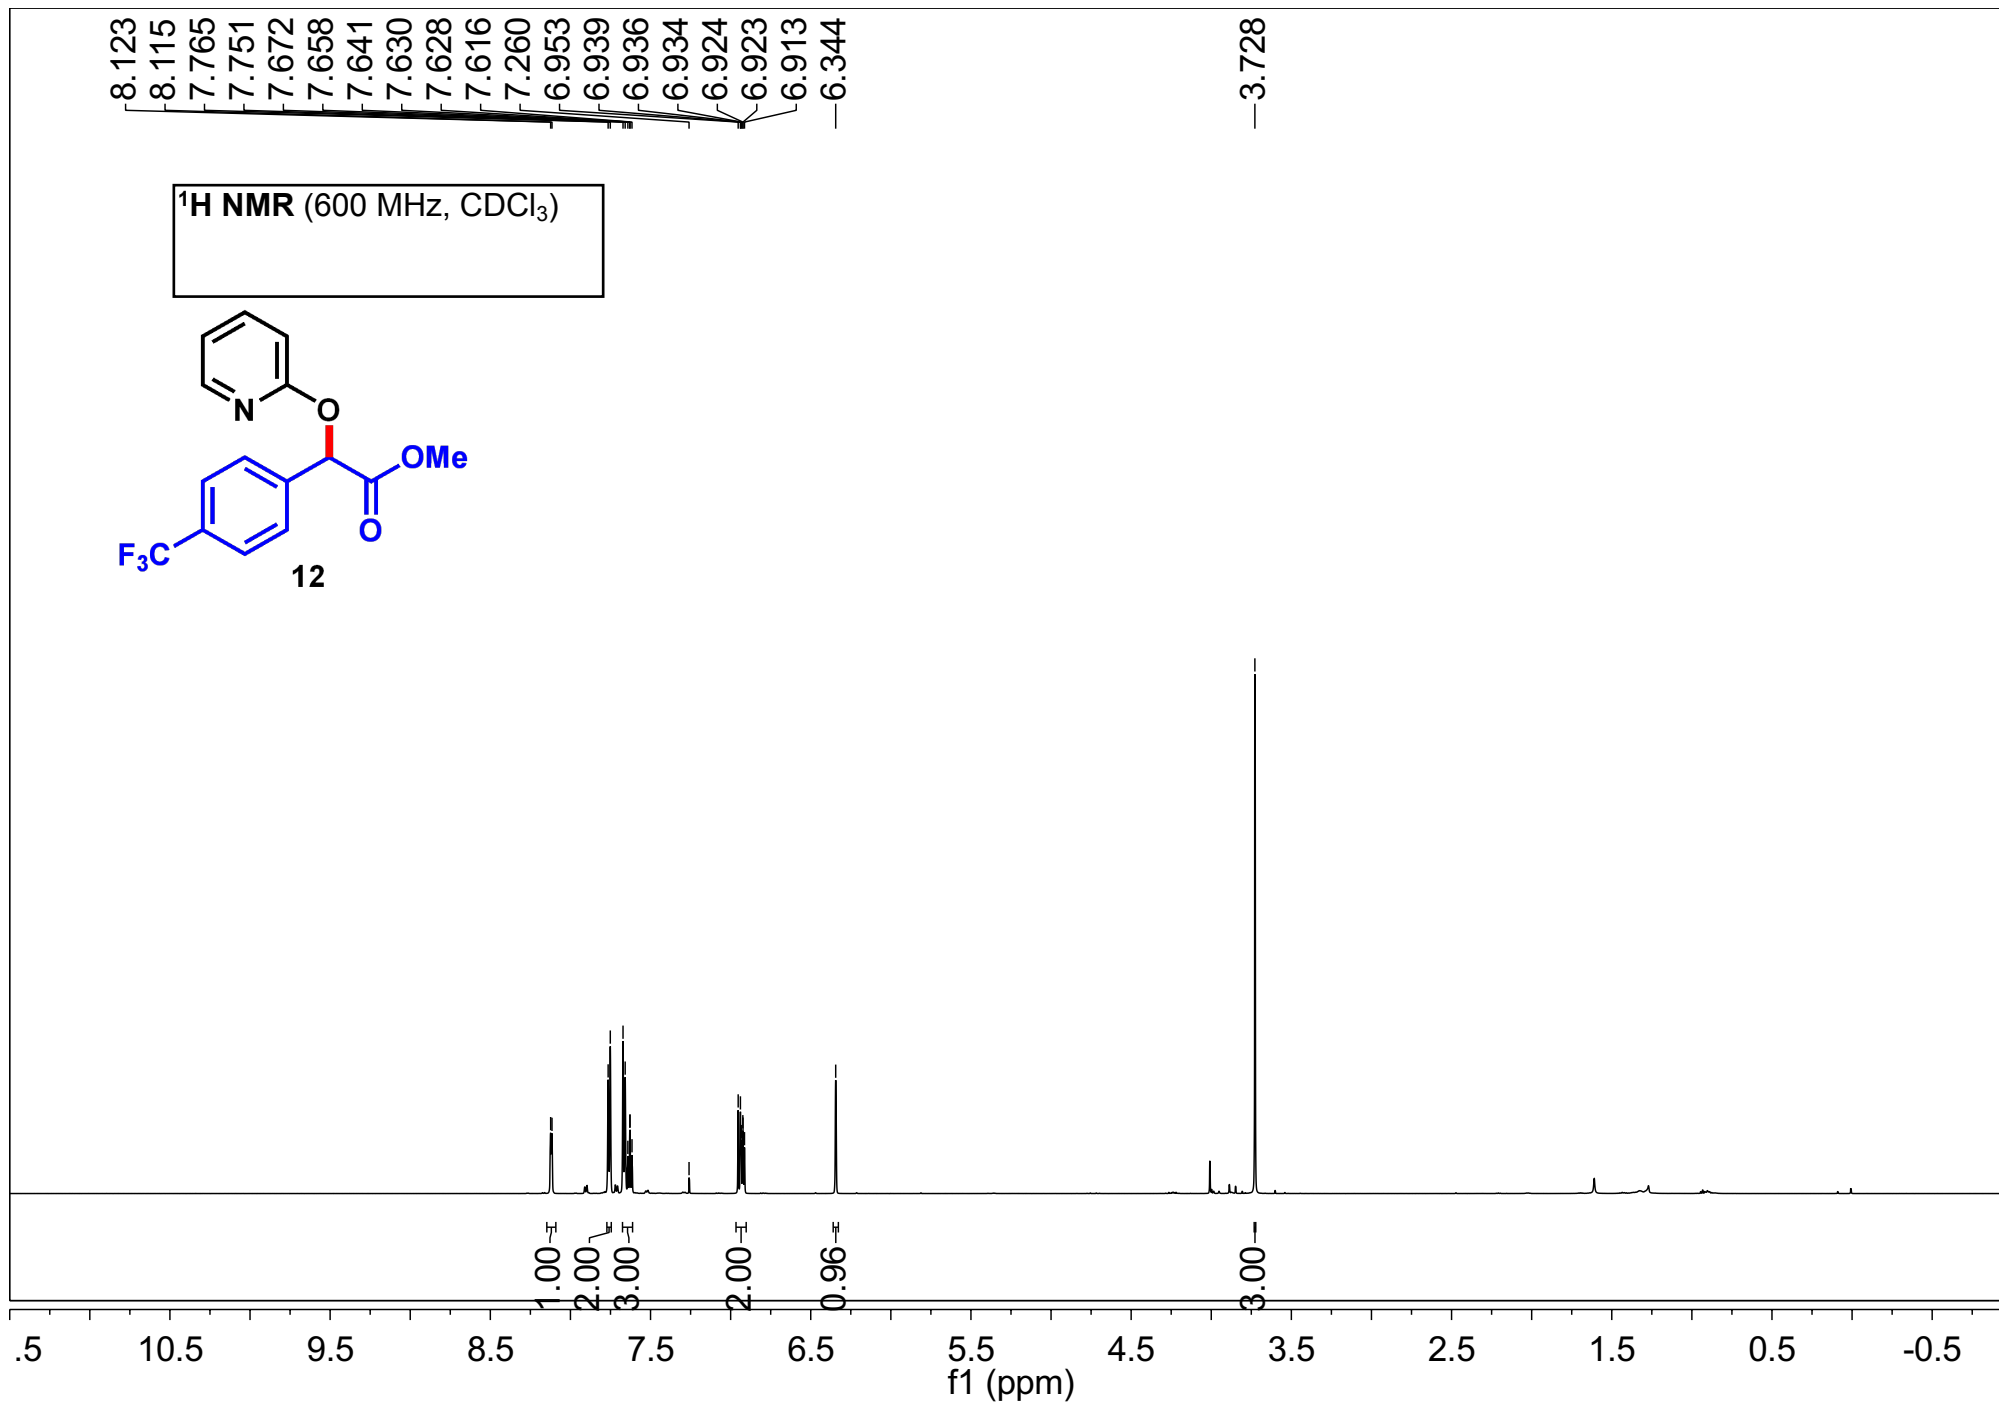

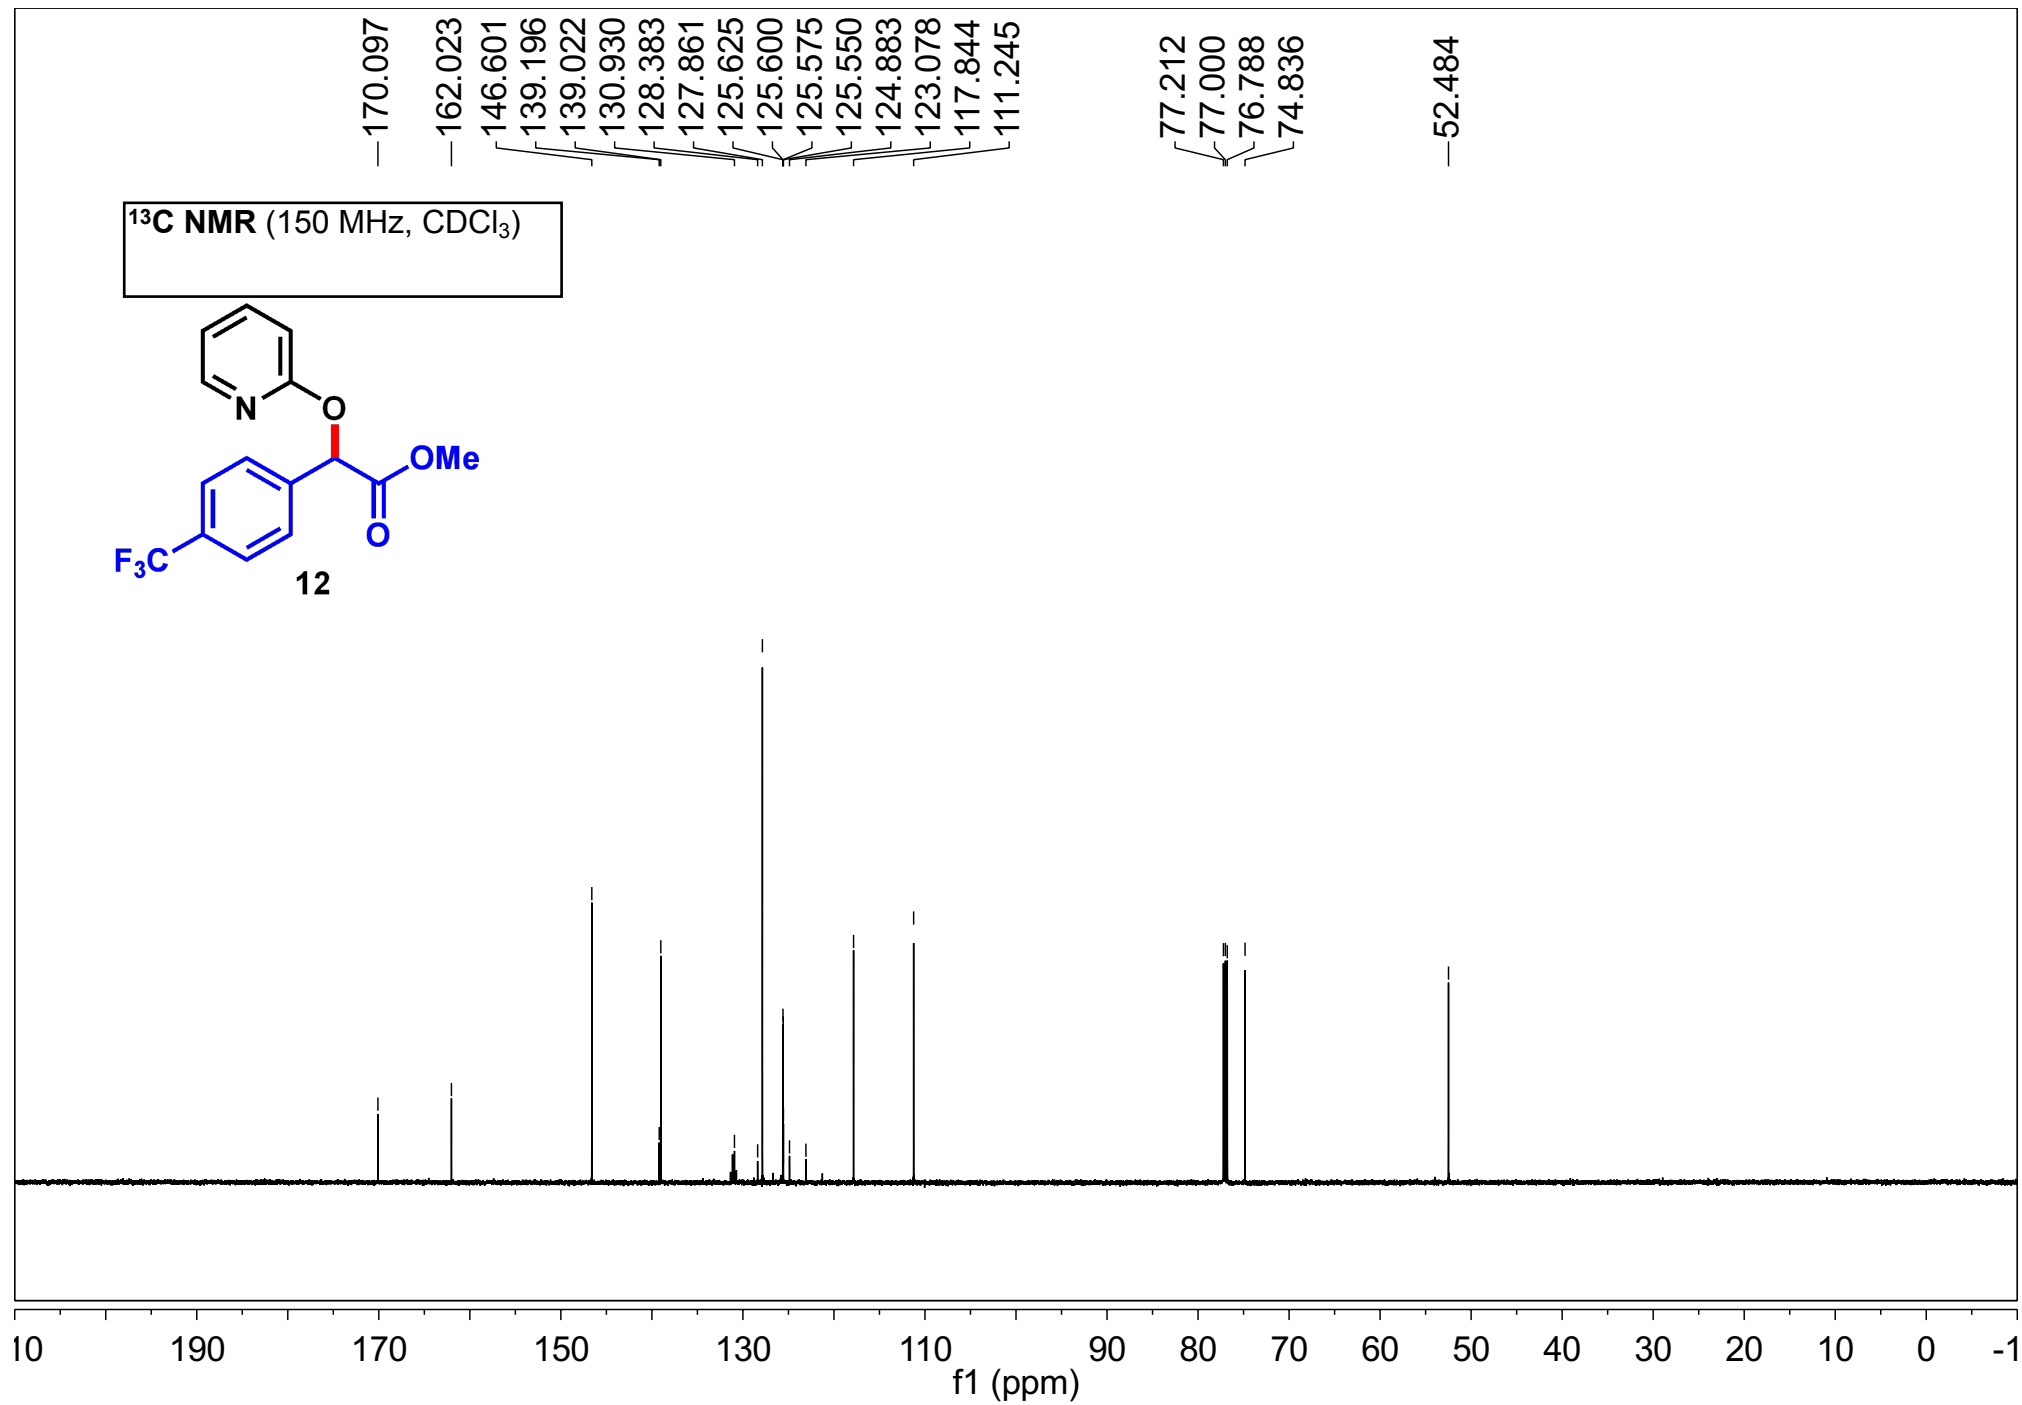

**<sup>19</sup>F NMR (376 MHz, CDCl<sub>3</sub>)**

---63.121

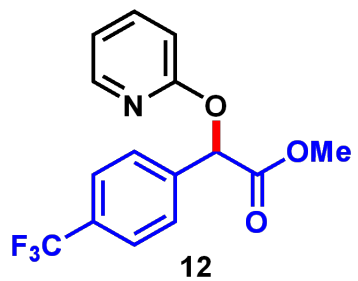

12

-45 -50 -55 -60 -65 -70 -75 -80 -85 -90 -95 -100 -105  
f1 (ppm)

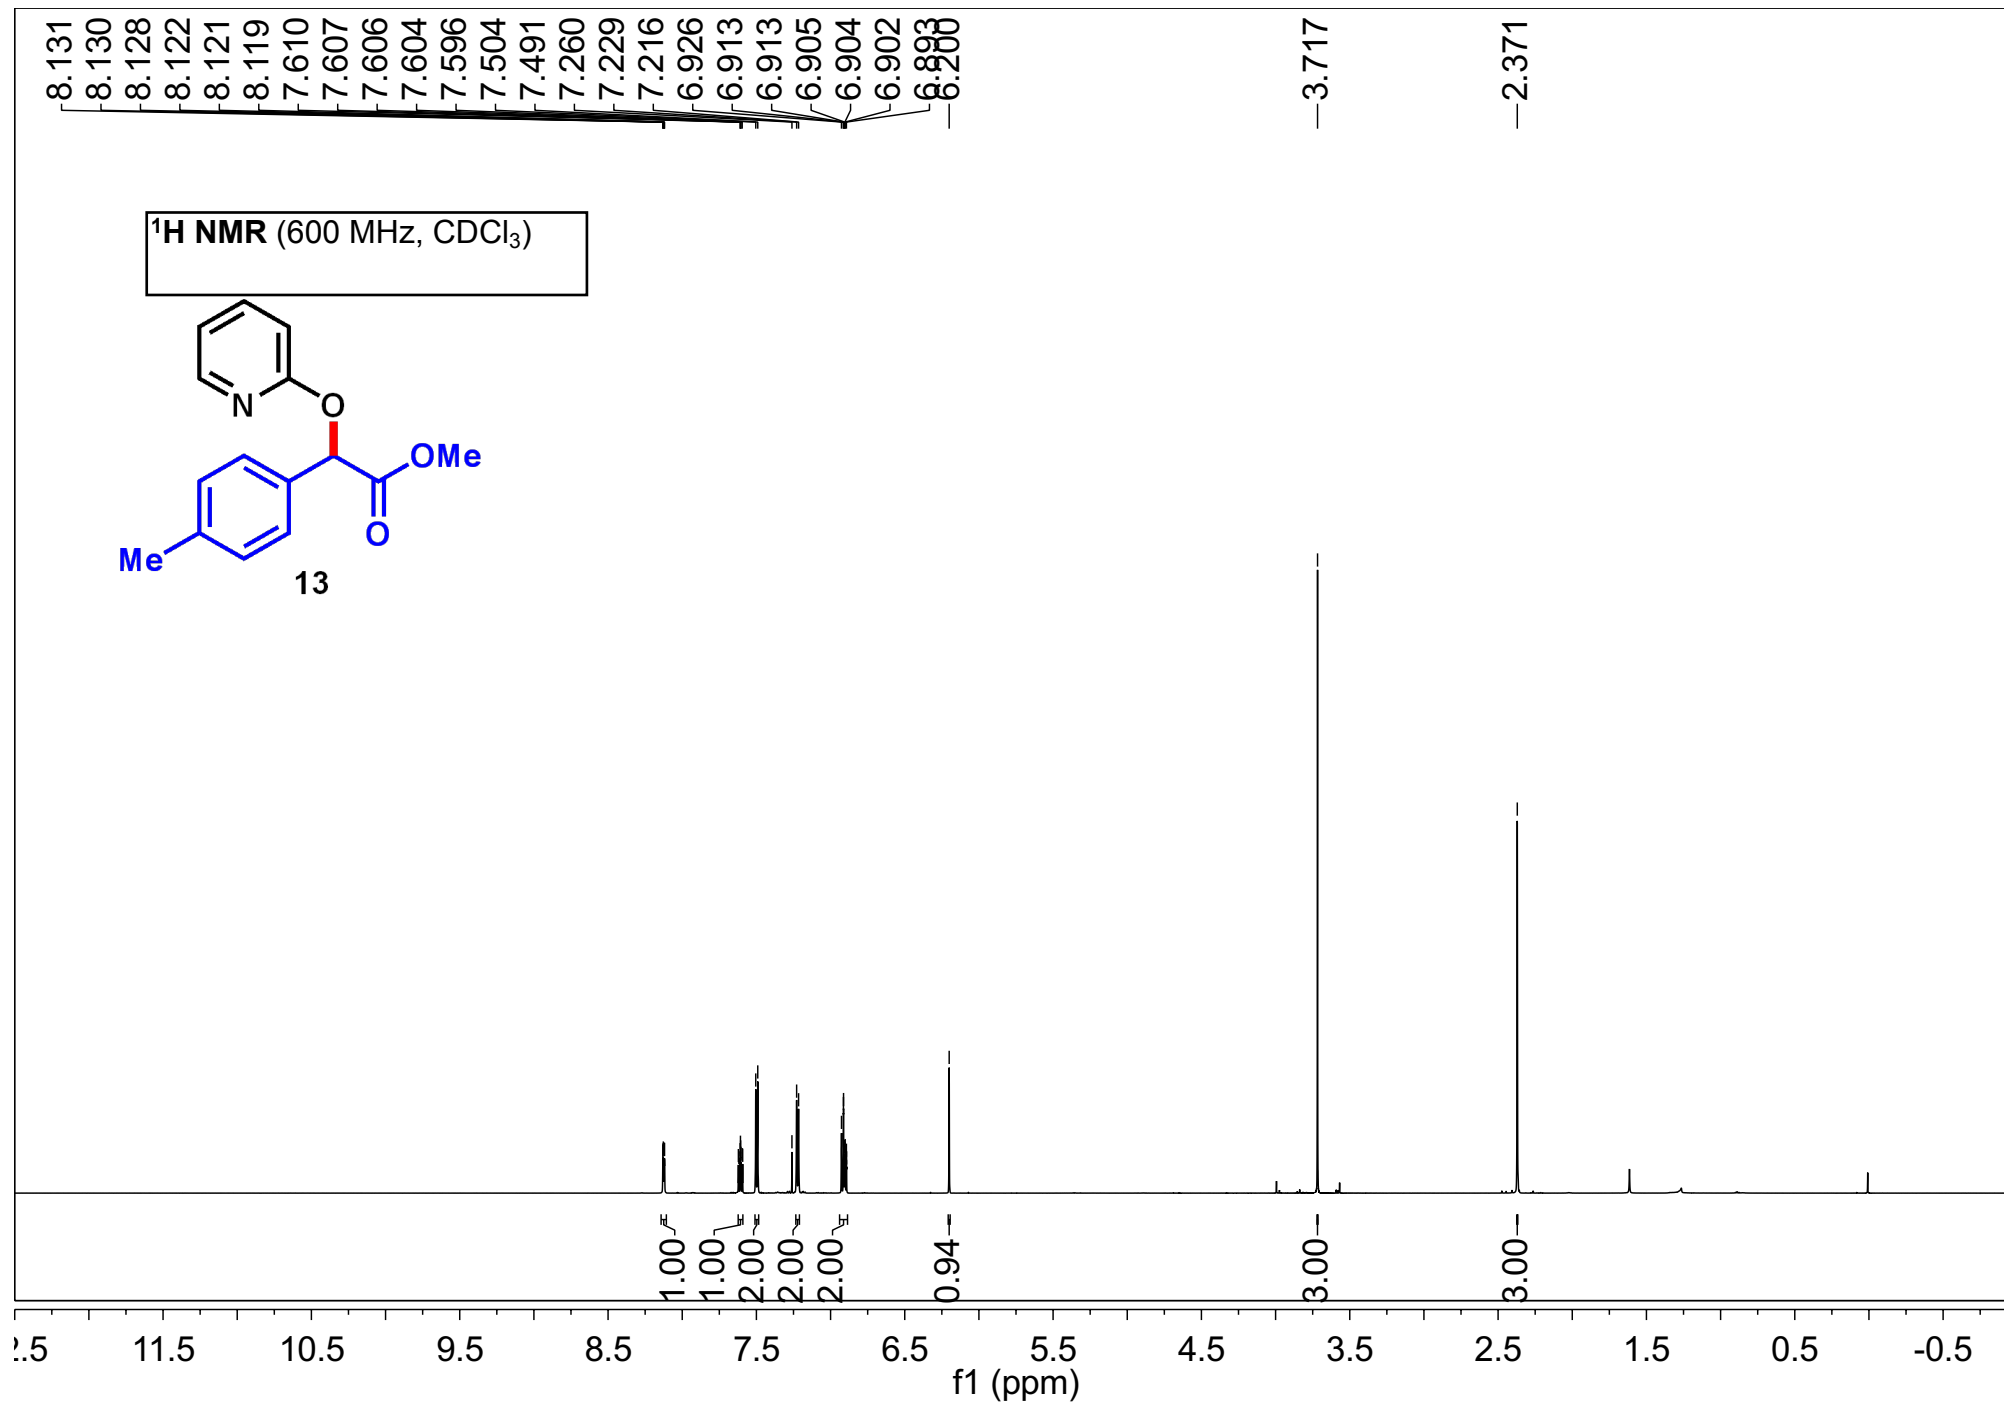

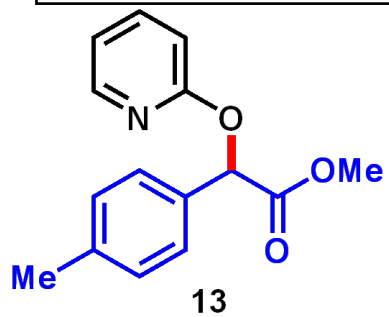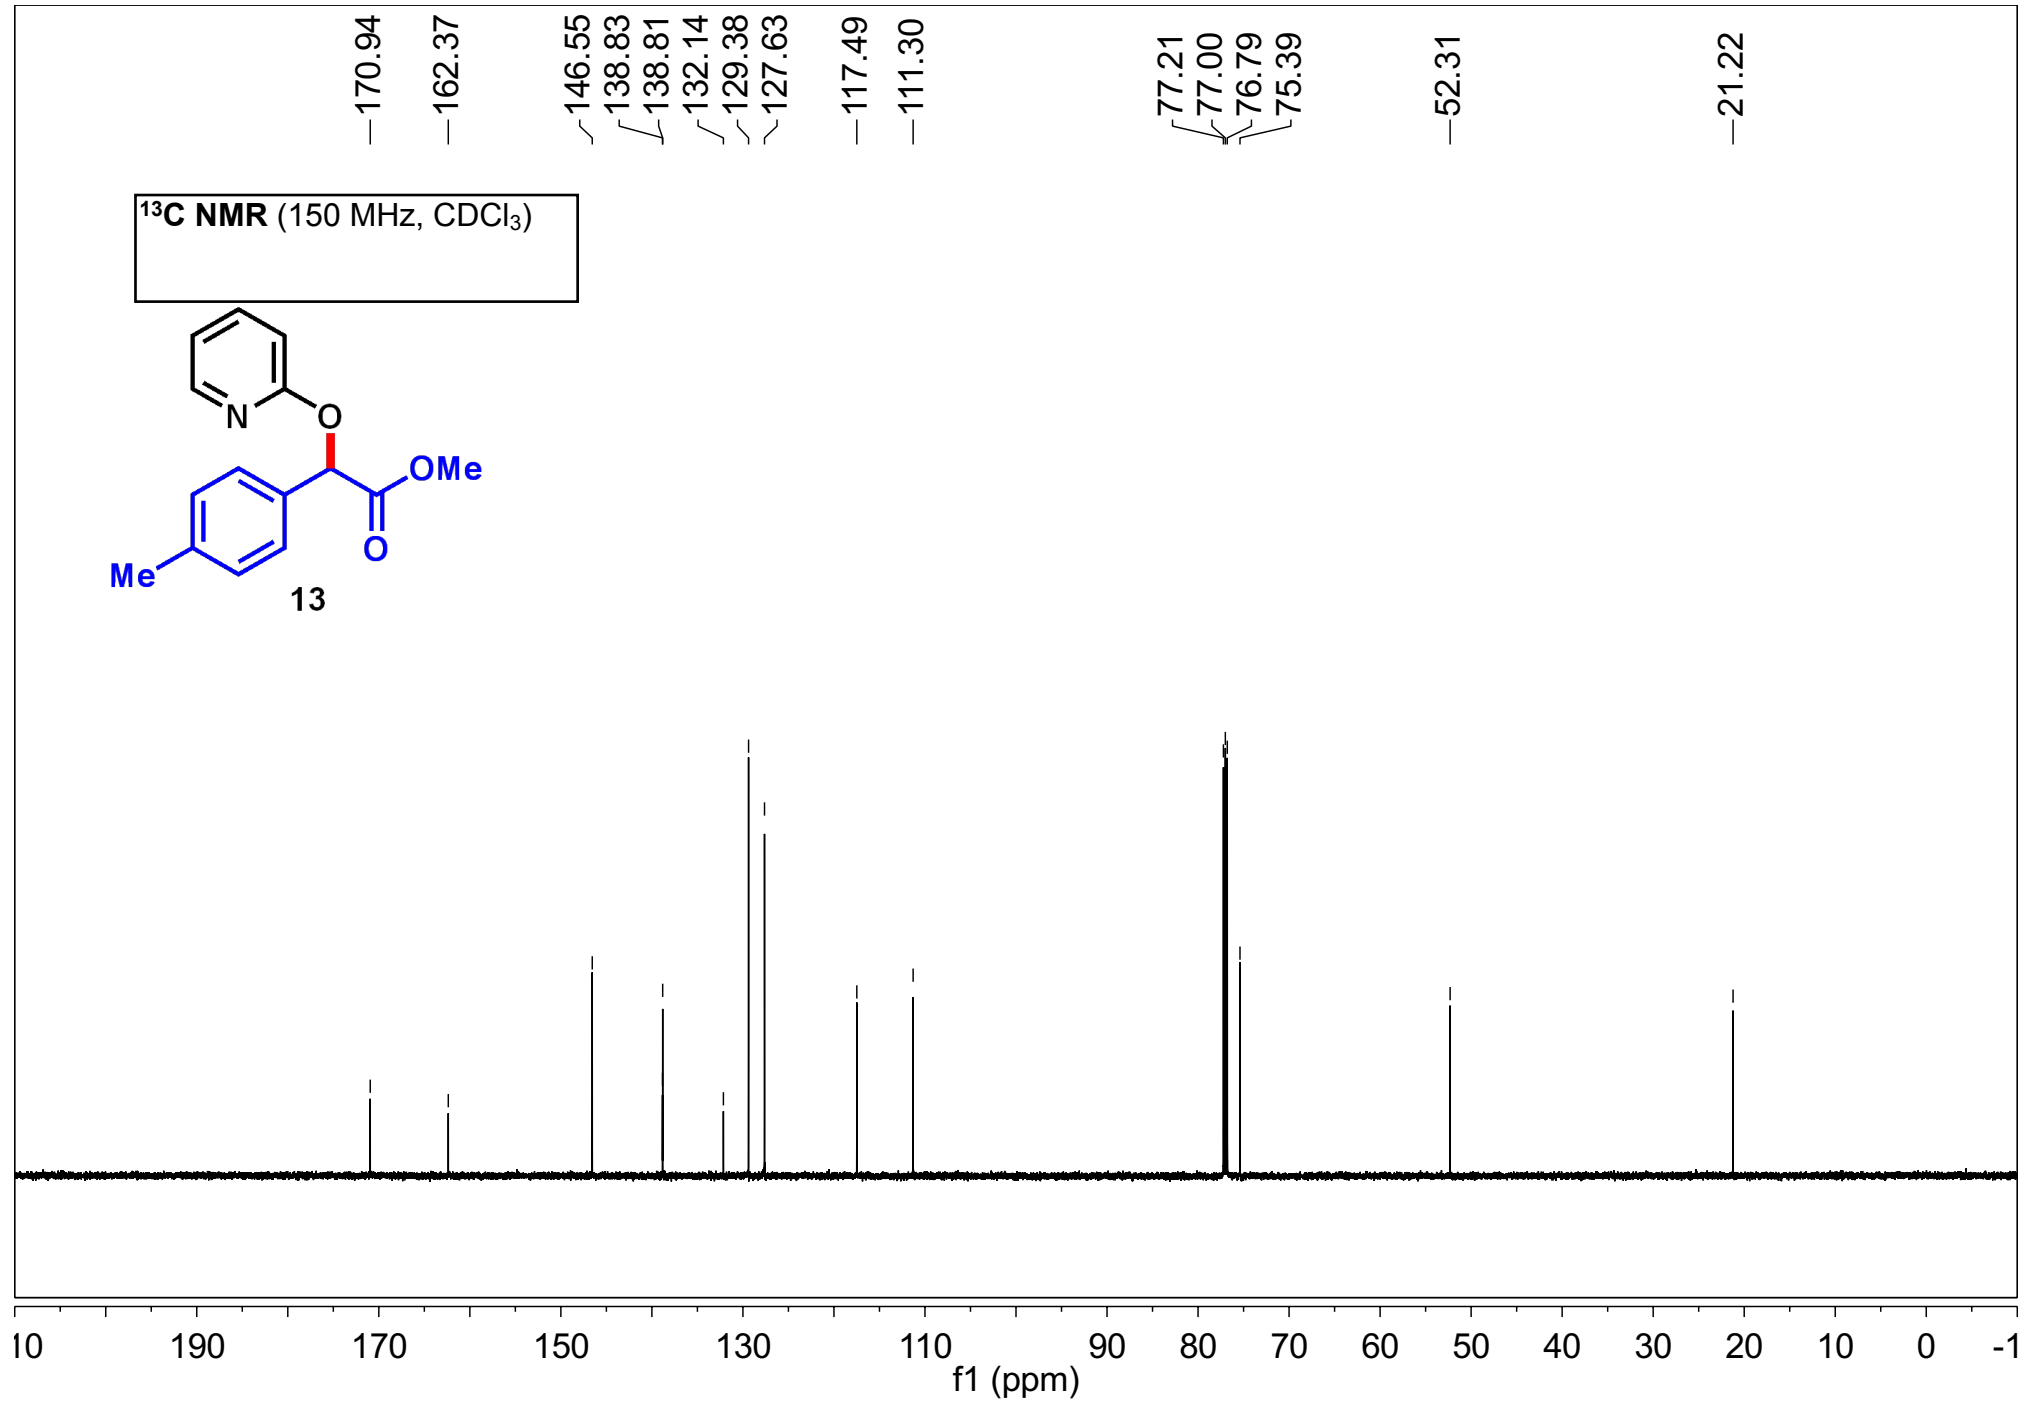

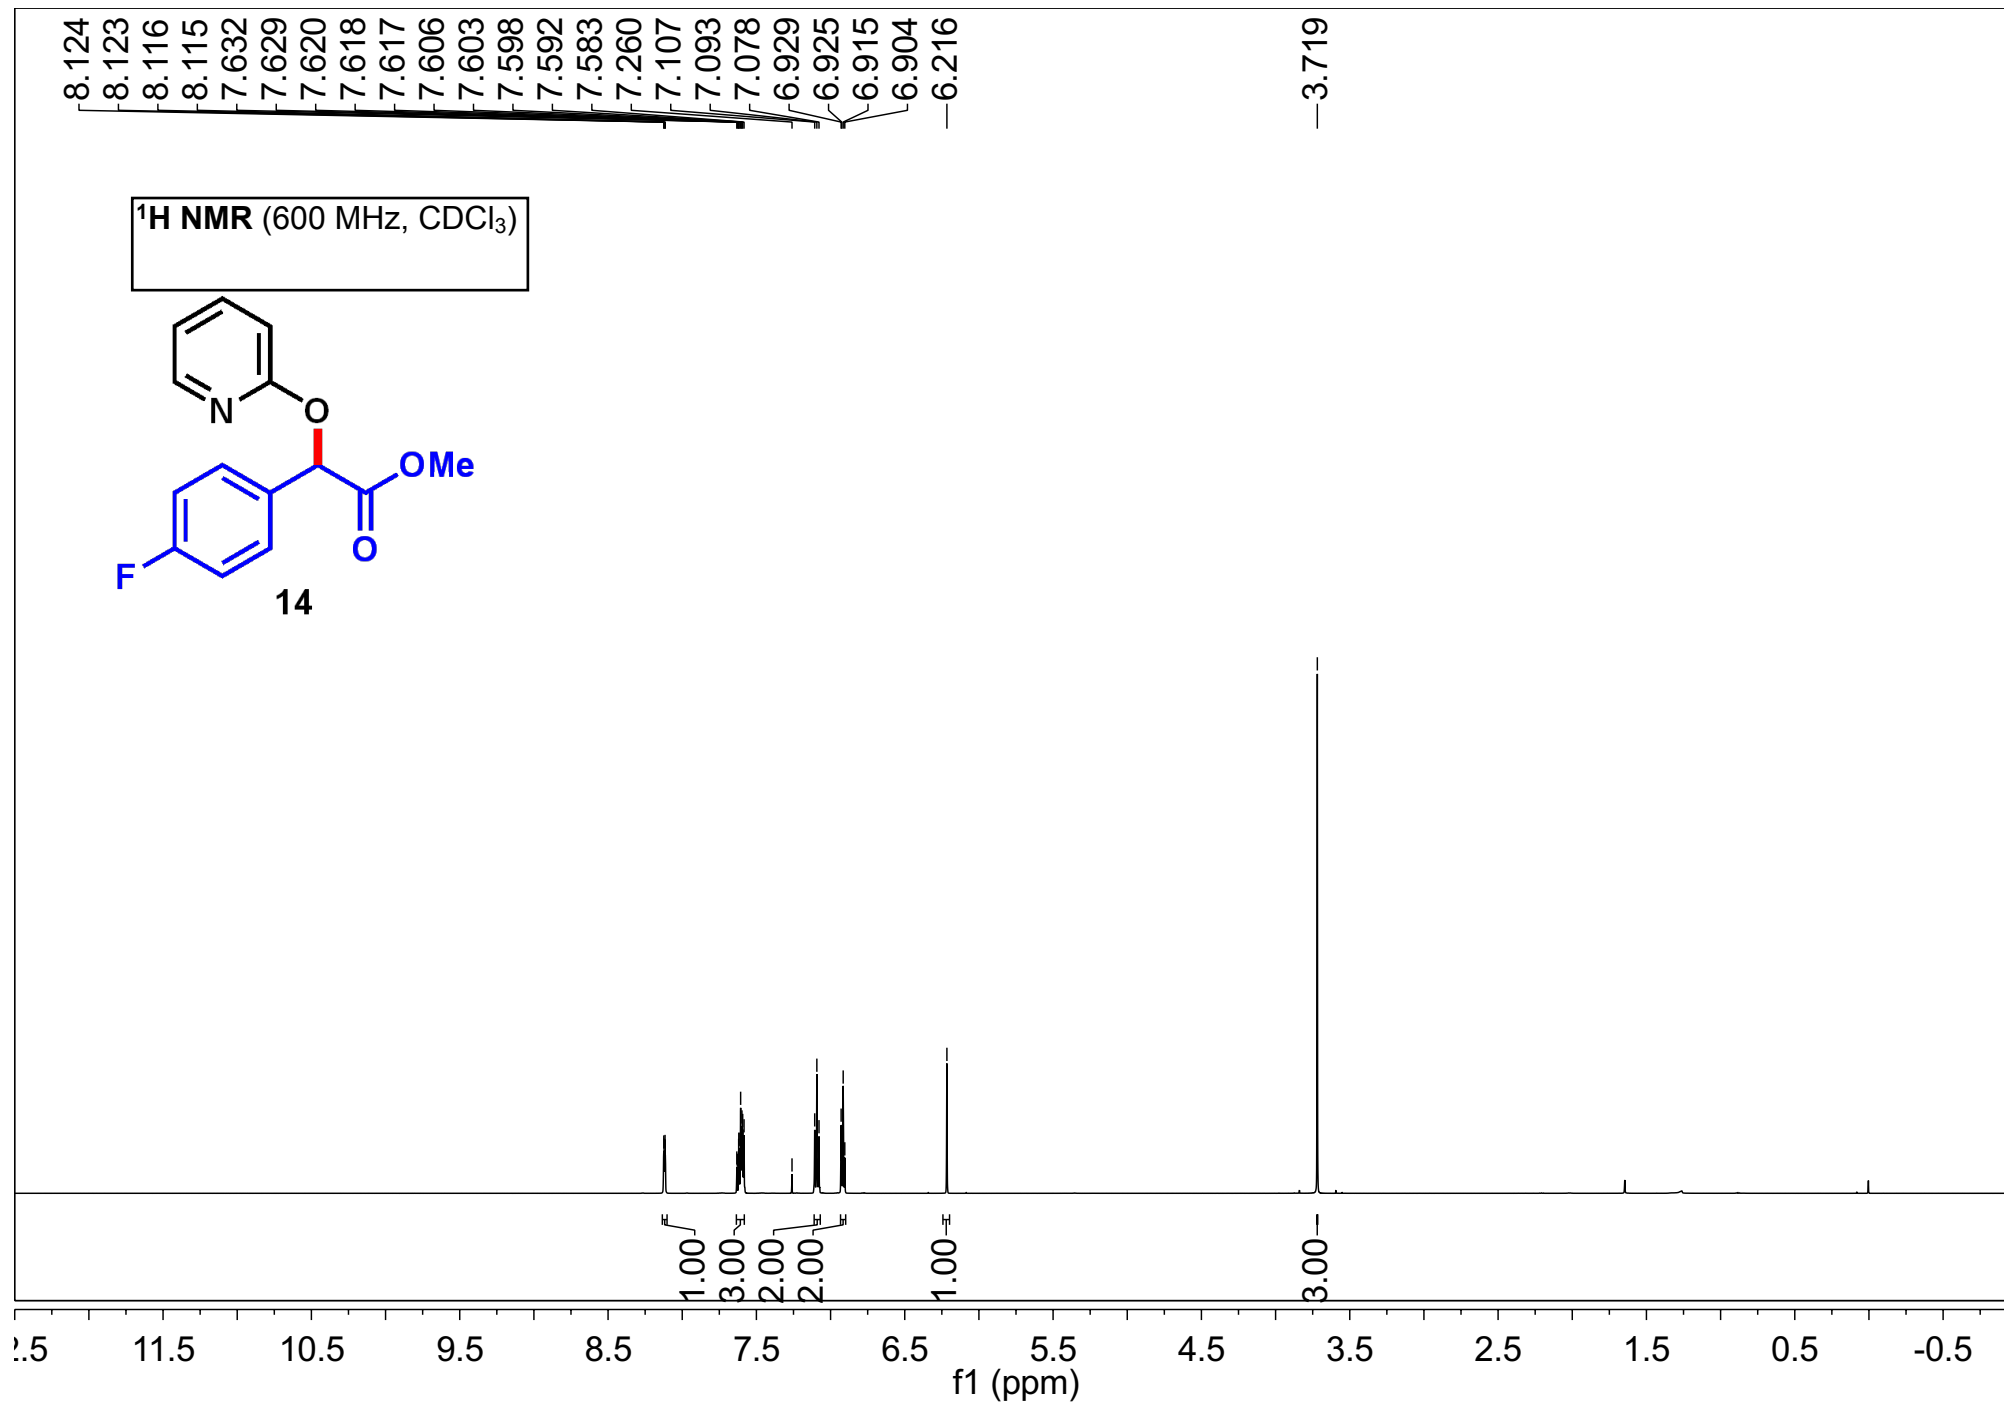

<sup>13</sup>C NMR (150 MHz, CDCl<sub>3</sub>)

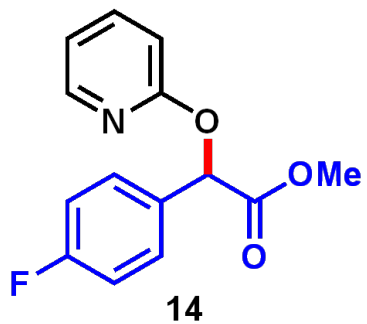

170.661  
163.843  
162.201  
162.128

146.549  
138.929  
131.013  
130.991  
129.482  
129.427

117.664  
115.702  
115.559  
111.218

77.212  
77.000  
76.788  
74.775

52.397

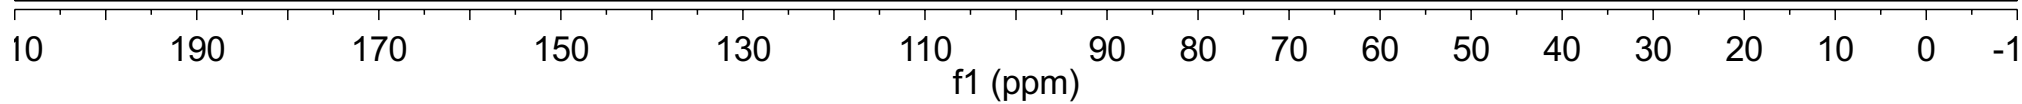

**<sup>19</sup>F NMR (376 MHz, CDCl<sub>3</sub>)**

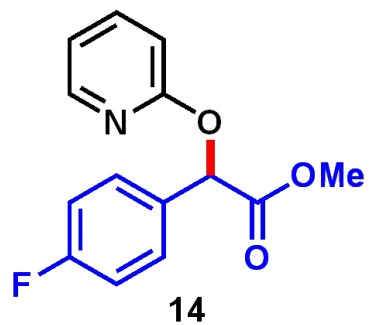

118.252  
118.266  
118.275  
118.289  
118.303  
118.312  
118.326

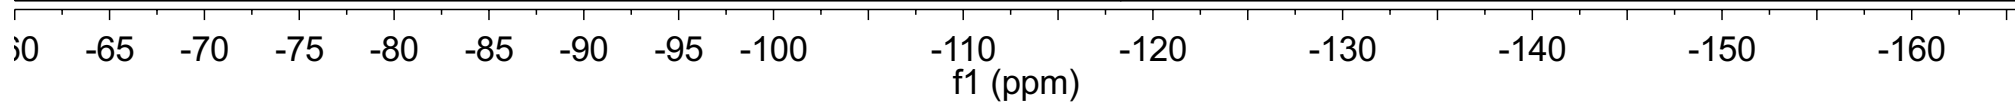



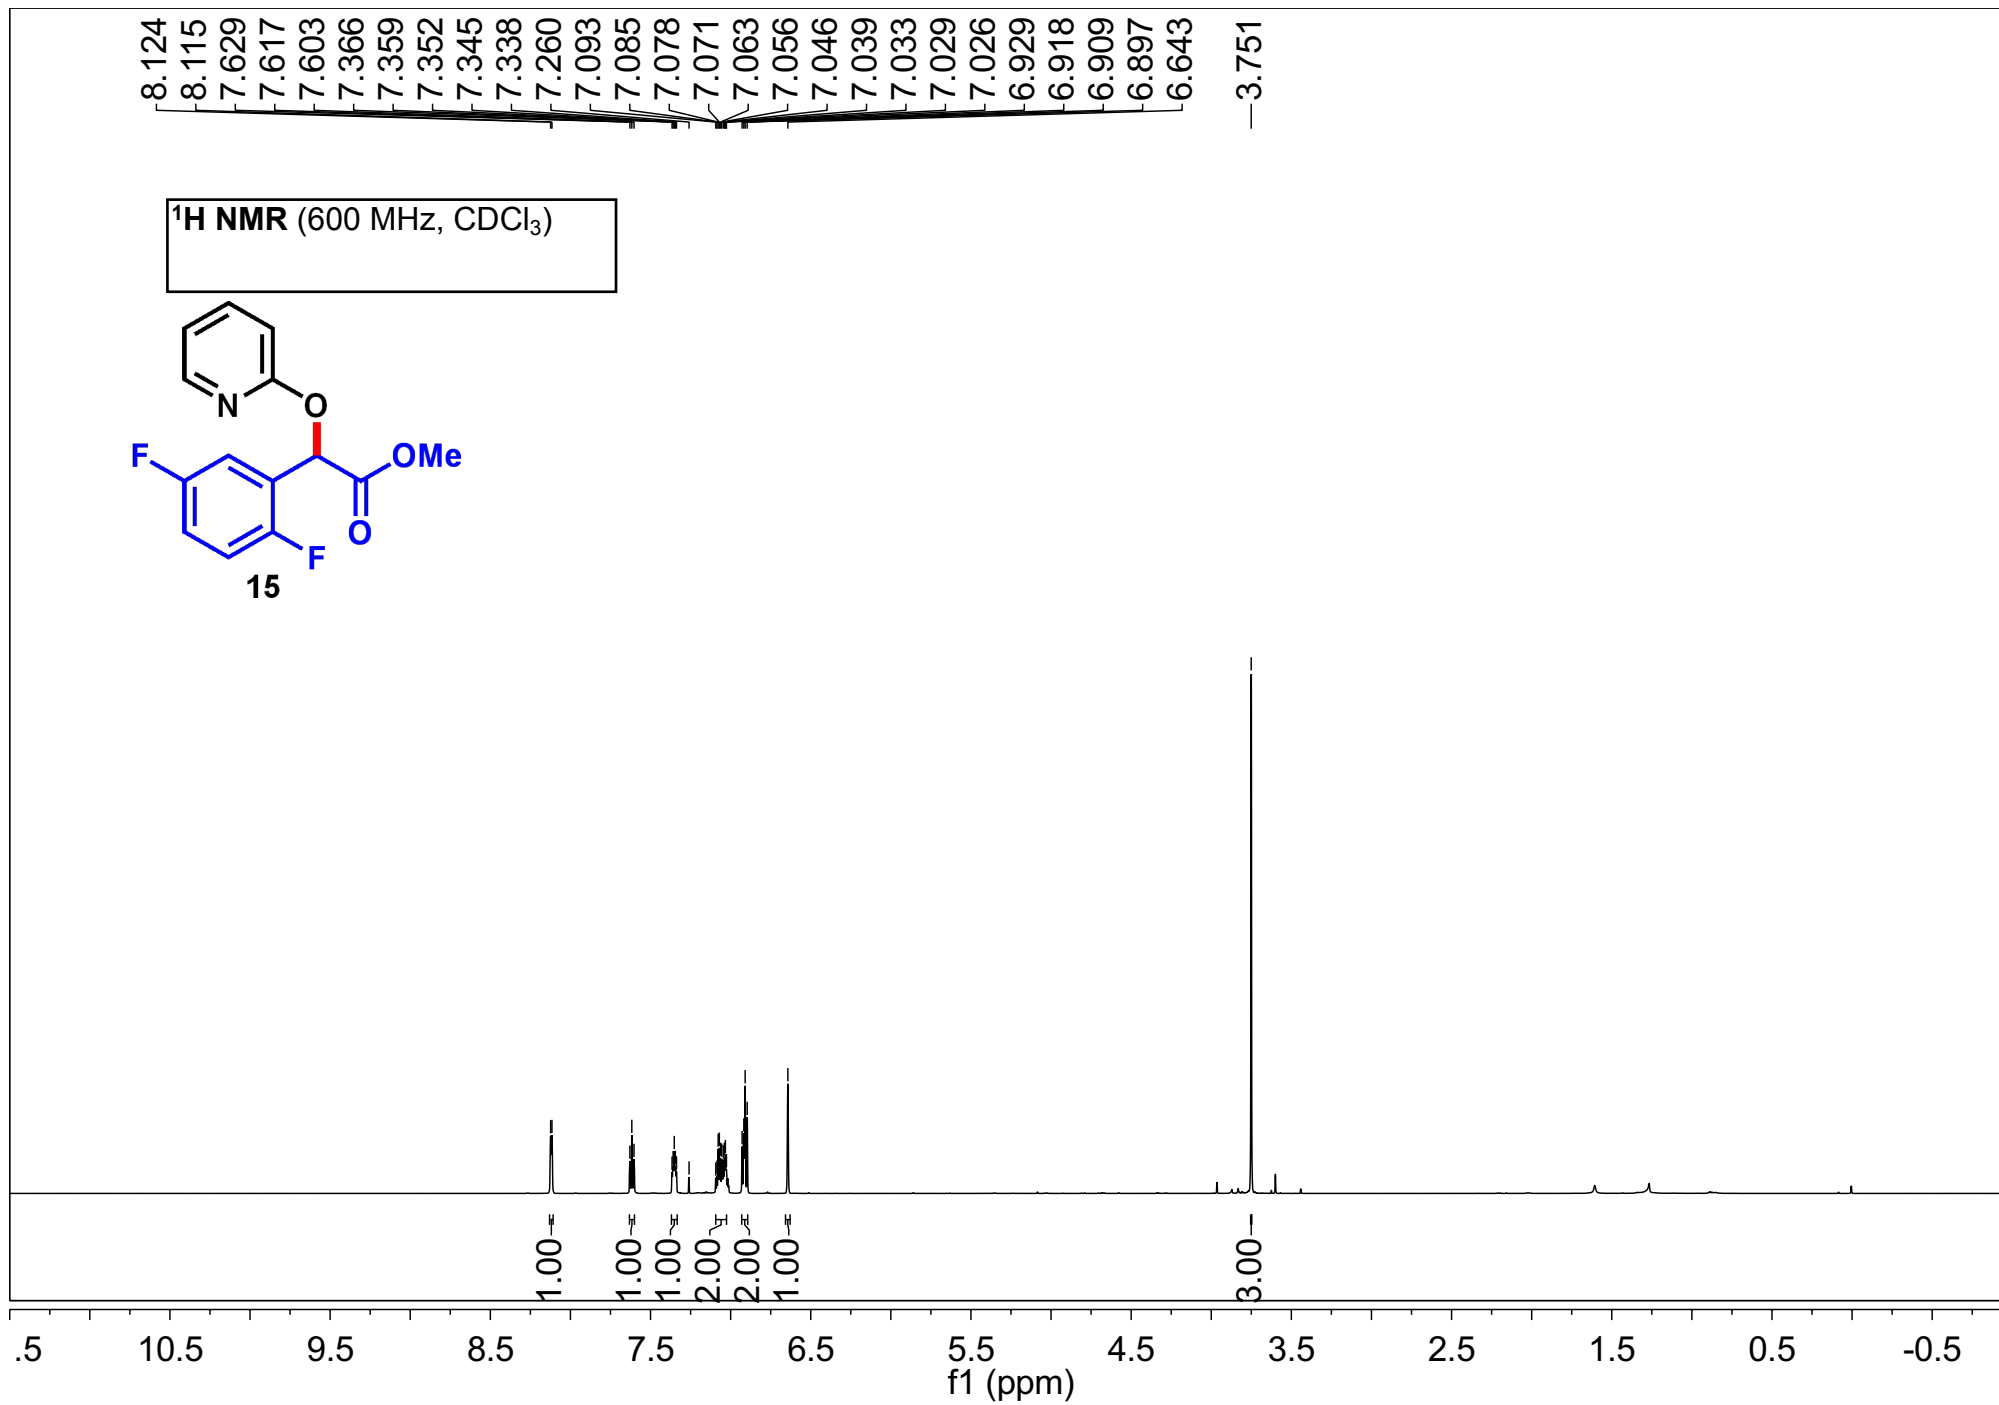

**<sup>13</sup>C NMR (150 MHz, CDCl<sub>3</sub>)**

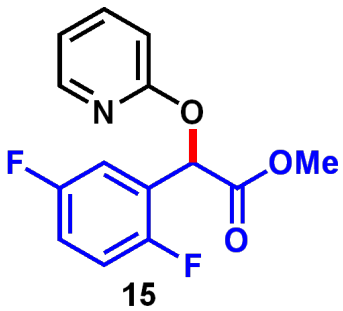

- 169.680
- 161.919
- 159.522
- 157.926
- 157.909
- 157.234
- 155.605
- 146.594
- 138.985
- 117.856
- 117.159
- 117.056
- 116.999
- 116.925
- 116.869
- 116.761
- 115.980
- 115.958
- 115.814
- 115.791
- 111.153
- 77.212
- 77.000
- 76.788
- 68.491
- 68.472
- 52.545

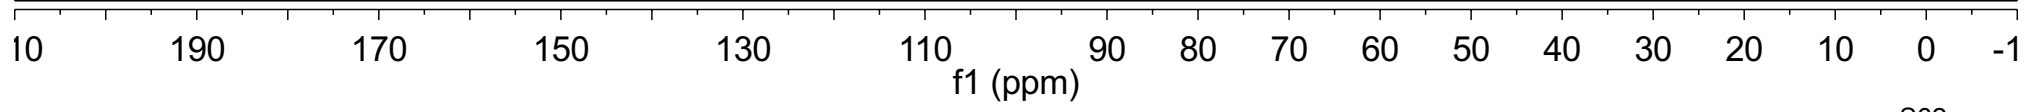

**<sup>19</sup>F NMR (376 MHz, CDCl<sub>3</sub>)**

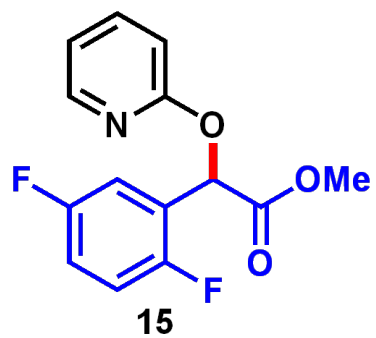

118.218  
118.230  
118.241  
118.254  
118.264  
118.276  
123.245  
123.257  
123.268  
123.280  
123.291  
123.303  
123.315  
123.326  
123.338

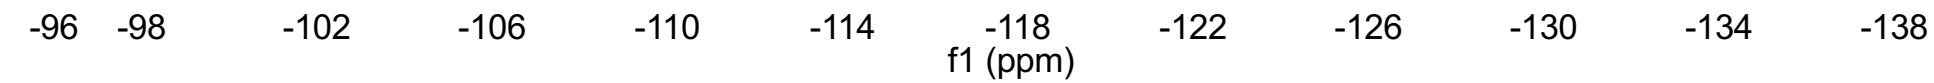

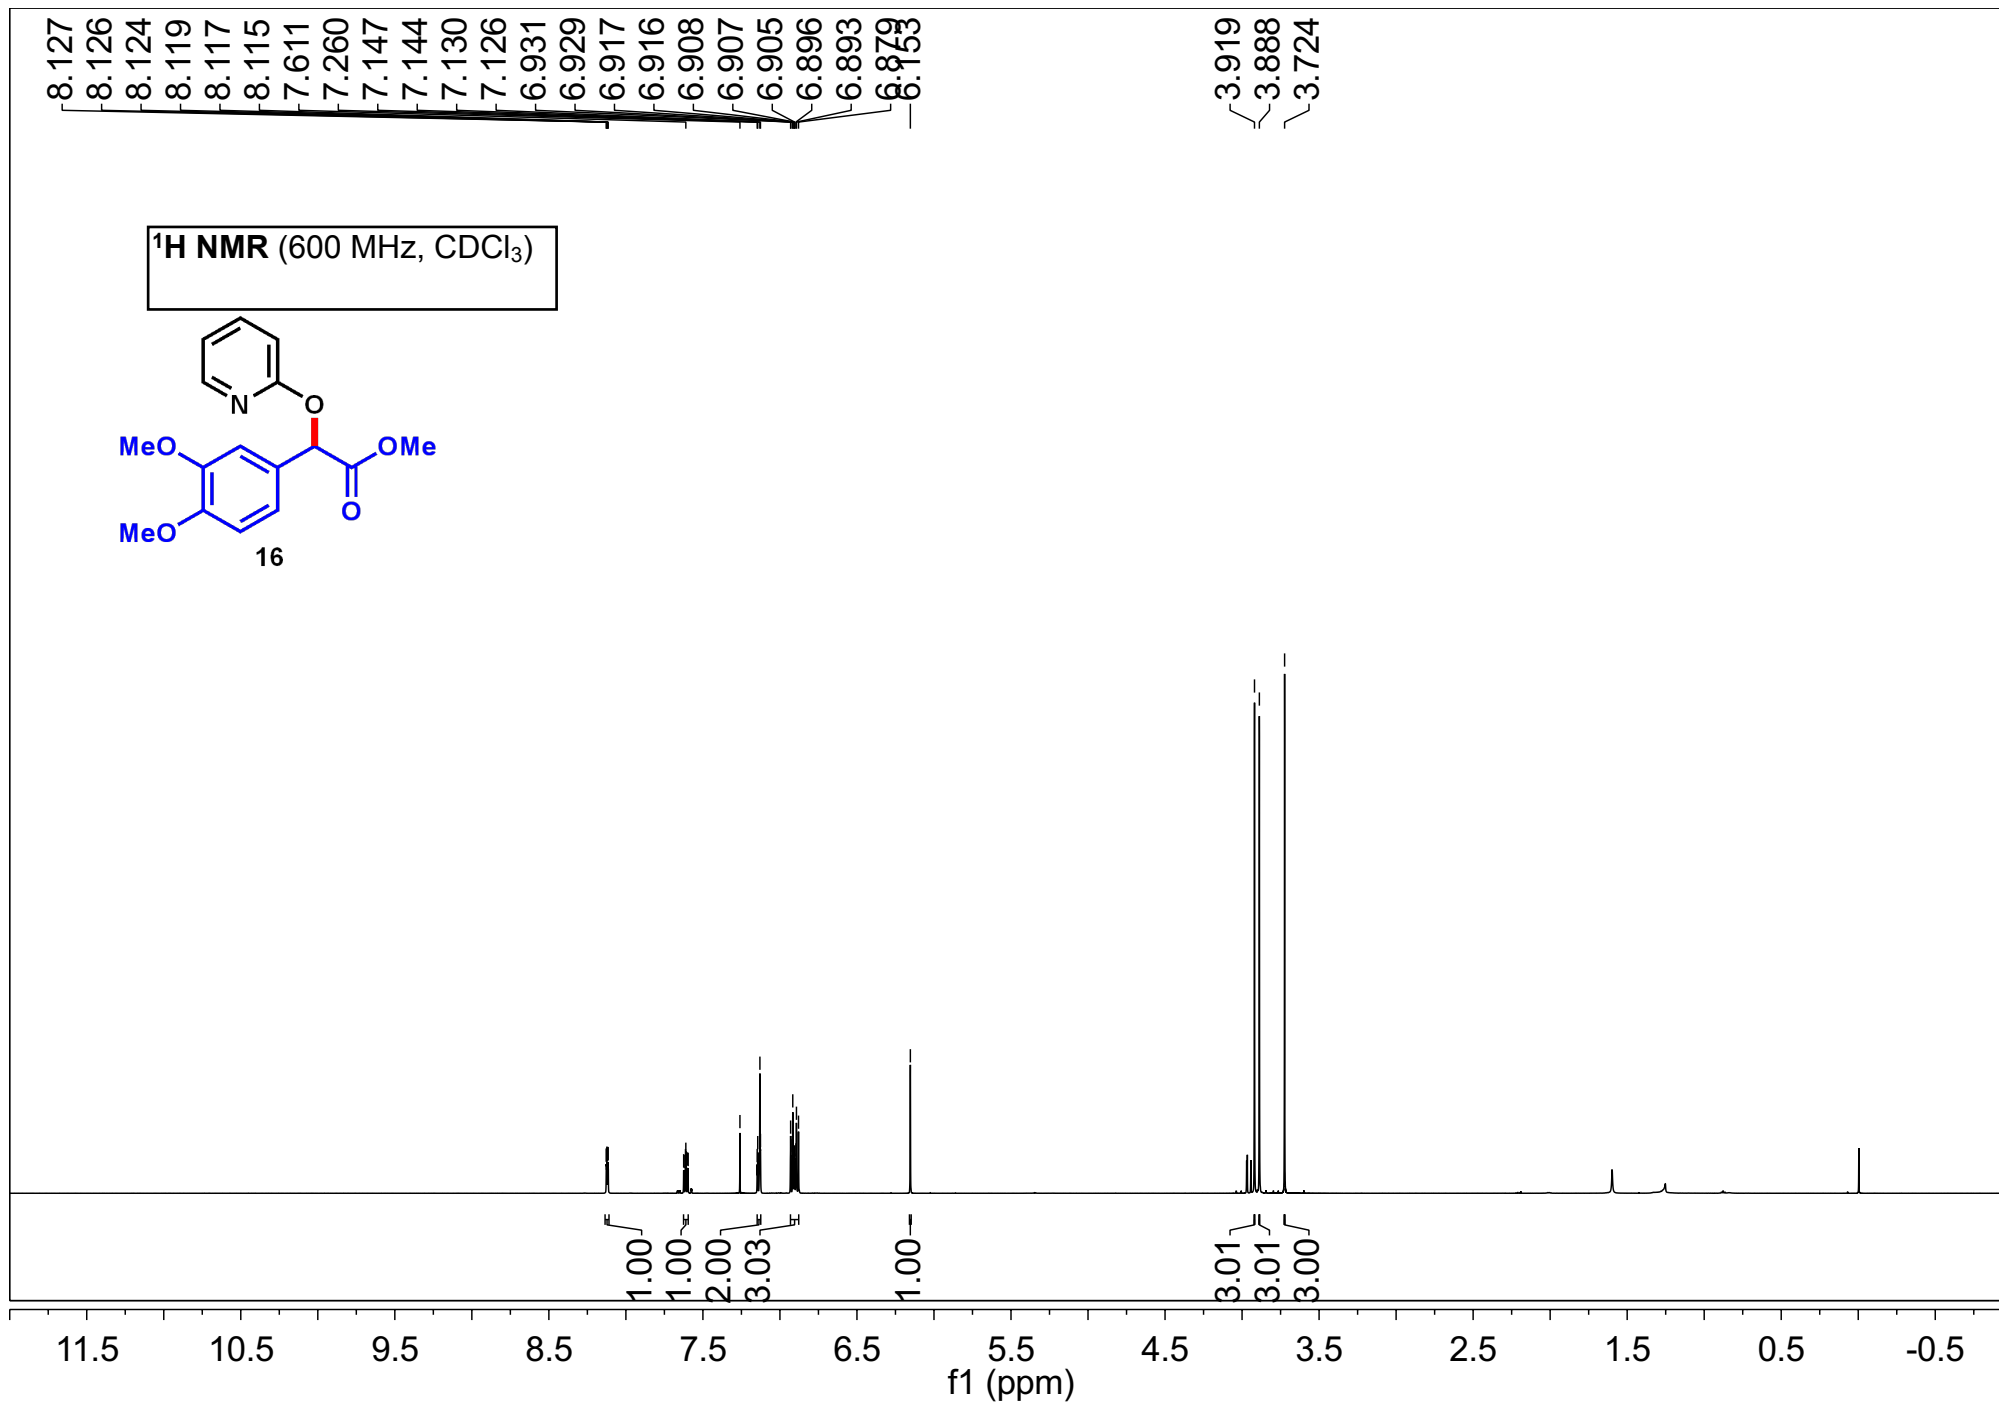

<sup>13</sup>C NMR (150 MHz, CDCl<sub>3</sub>)

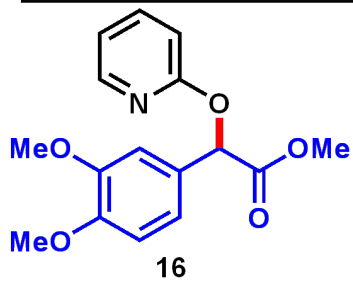

170.97  
162.32  
149.61  
149.15  
146.56  
138.85  
127.46  
120.55  
117.54  
111.27  
111.06  
110.60  
77.21  
77.00  
76.78  
75.39  
55.96  
55.91  
52.35

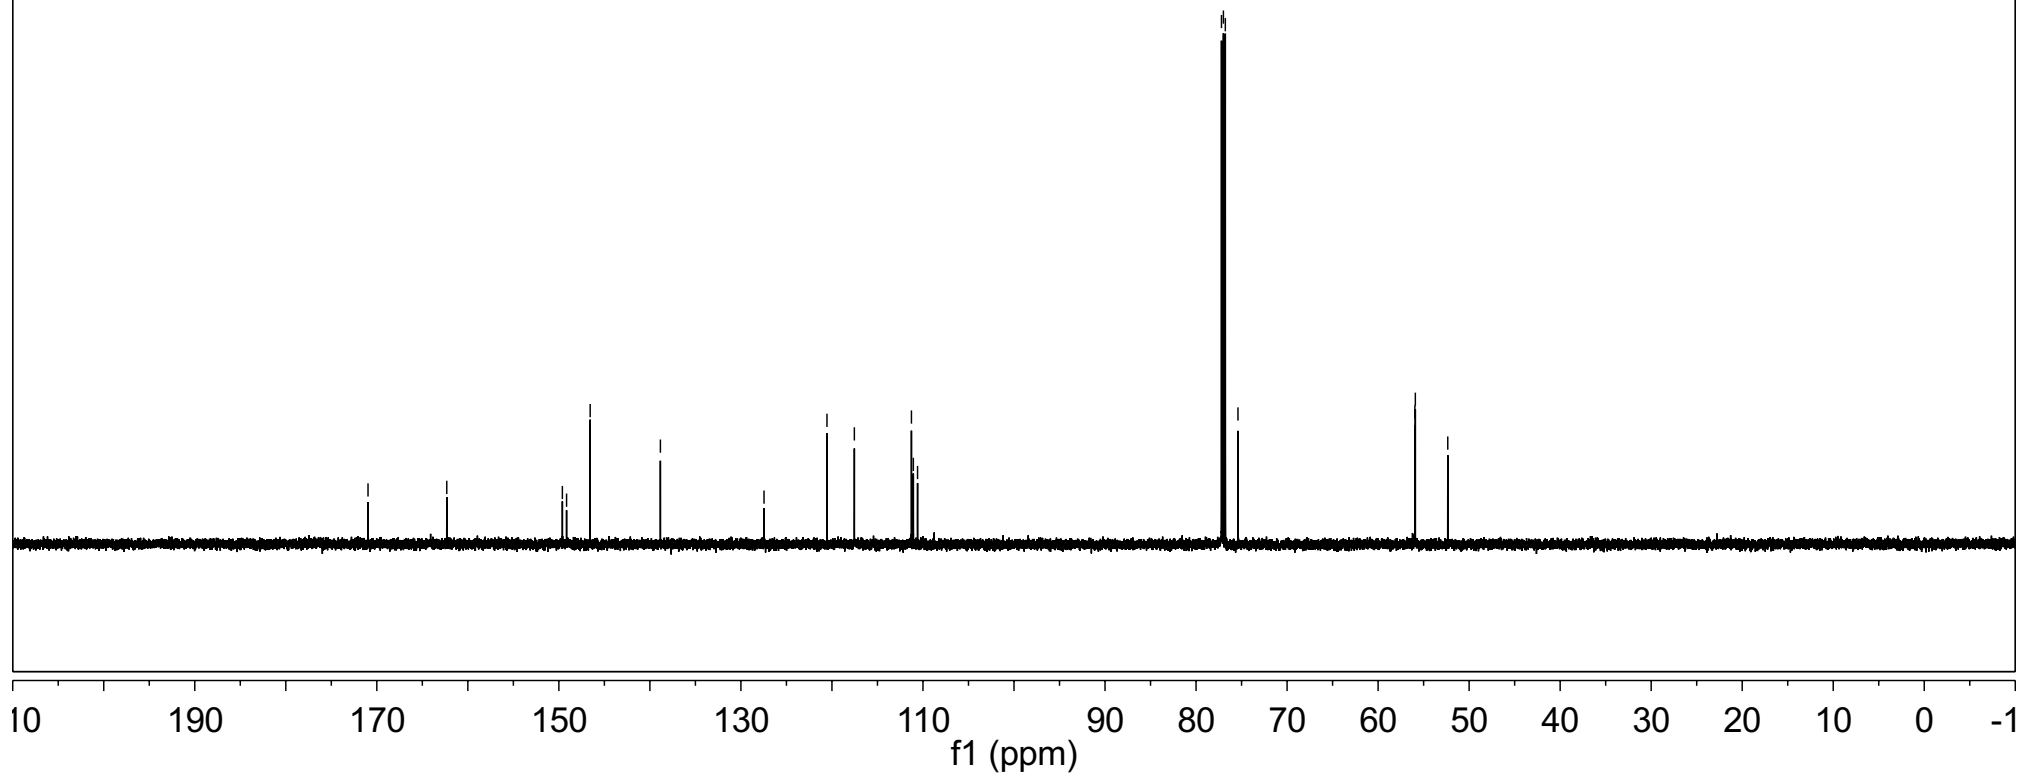

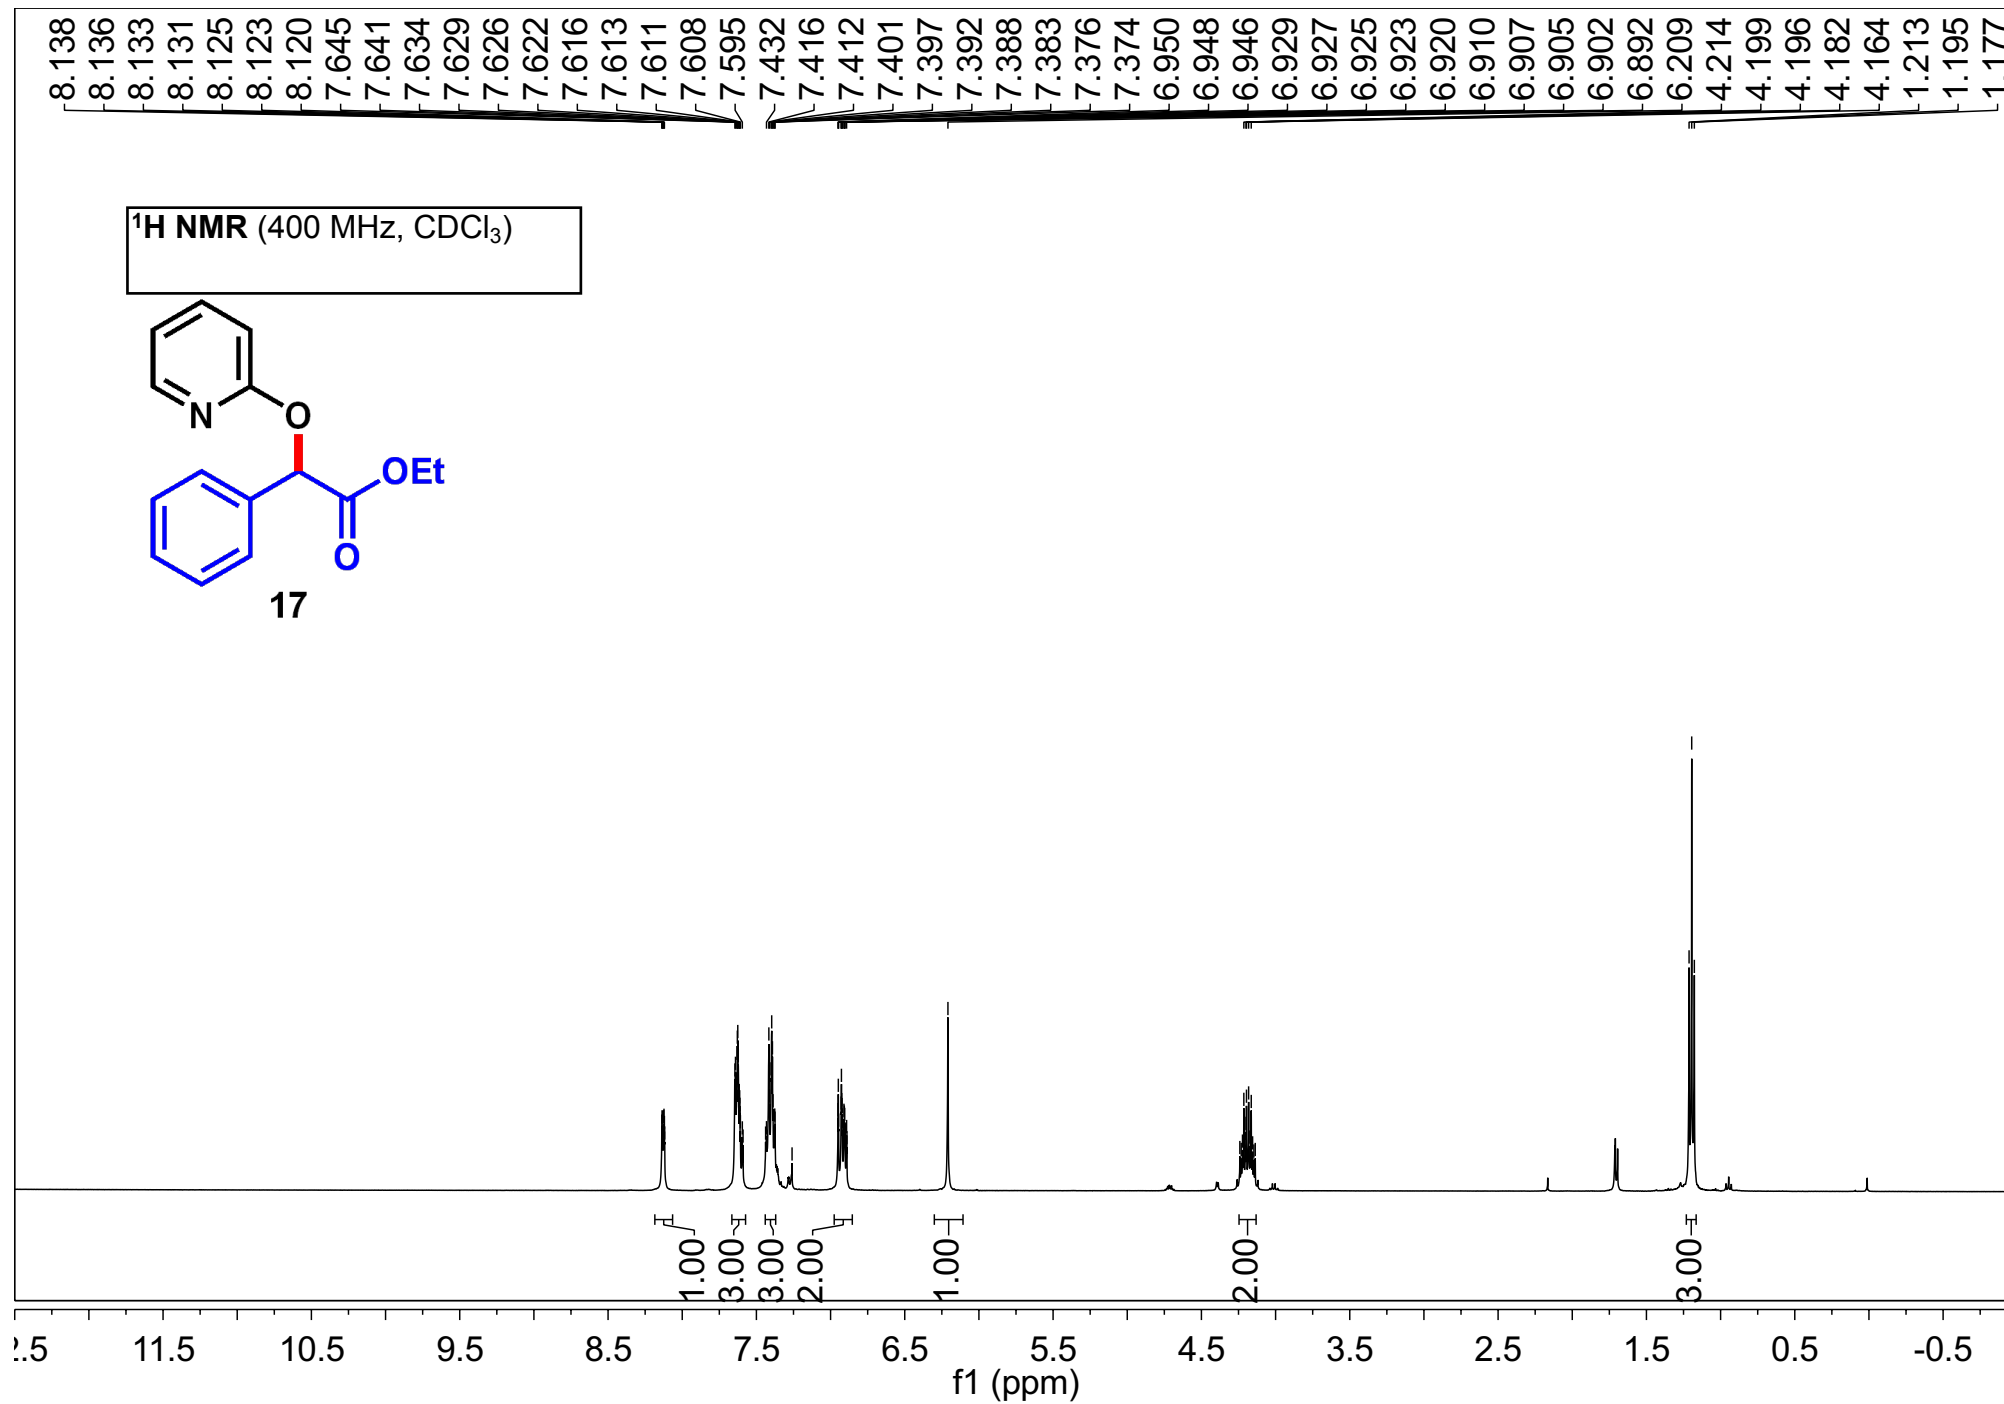

<sup>13</sup>C NMR (150 MHz, CDCl<sub>3</sub>)

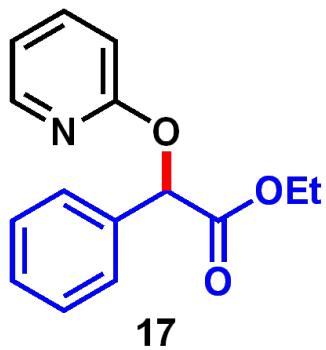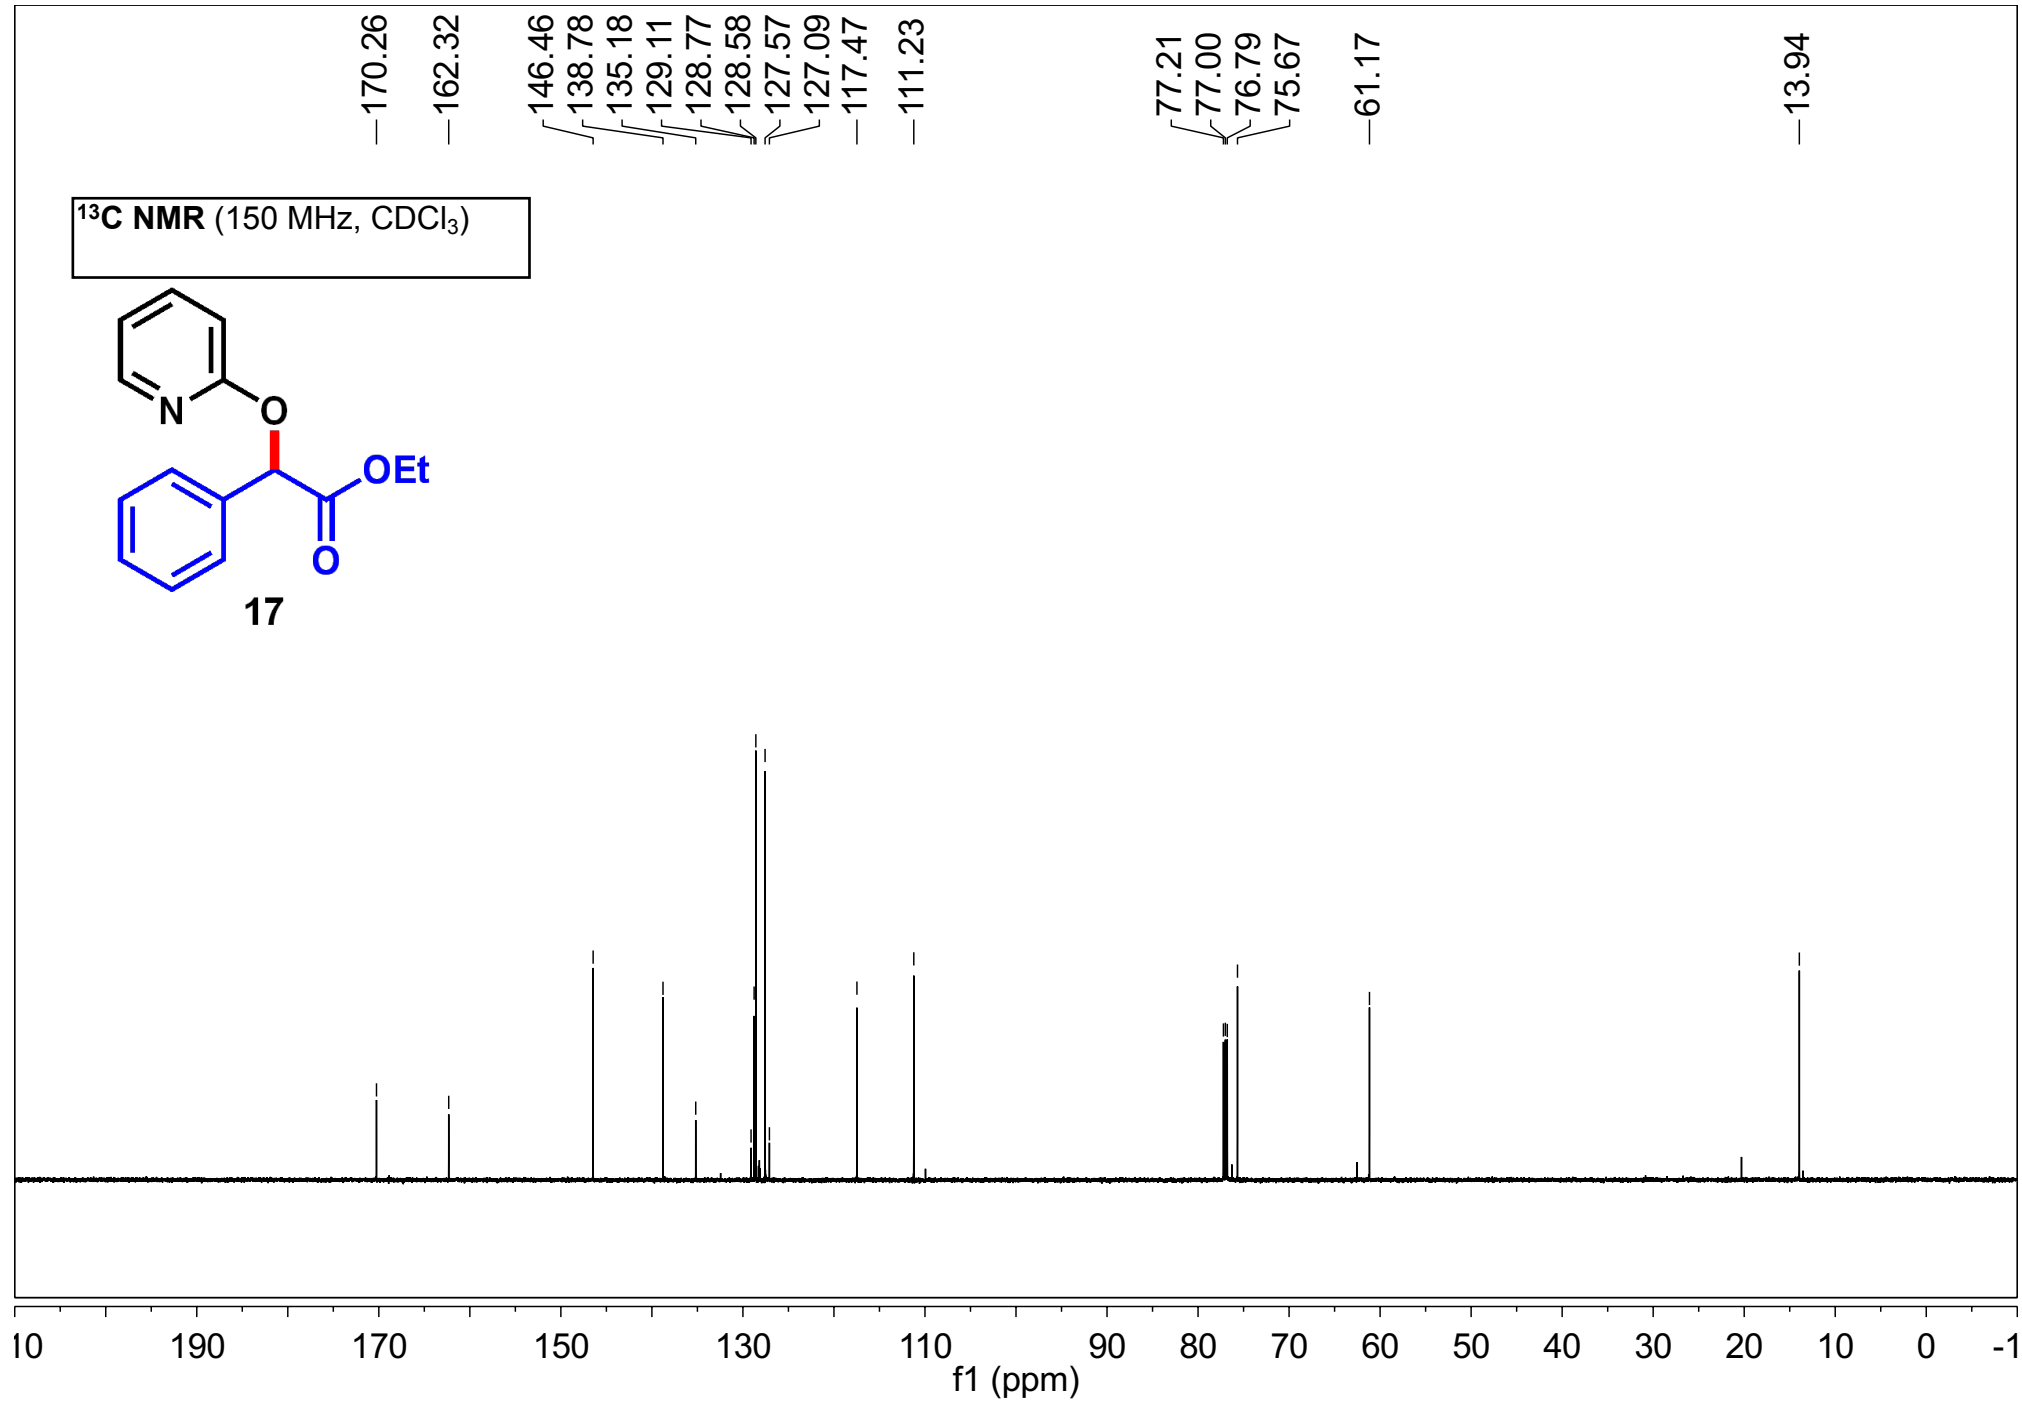

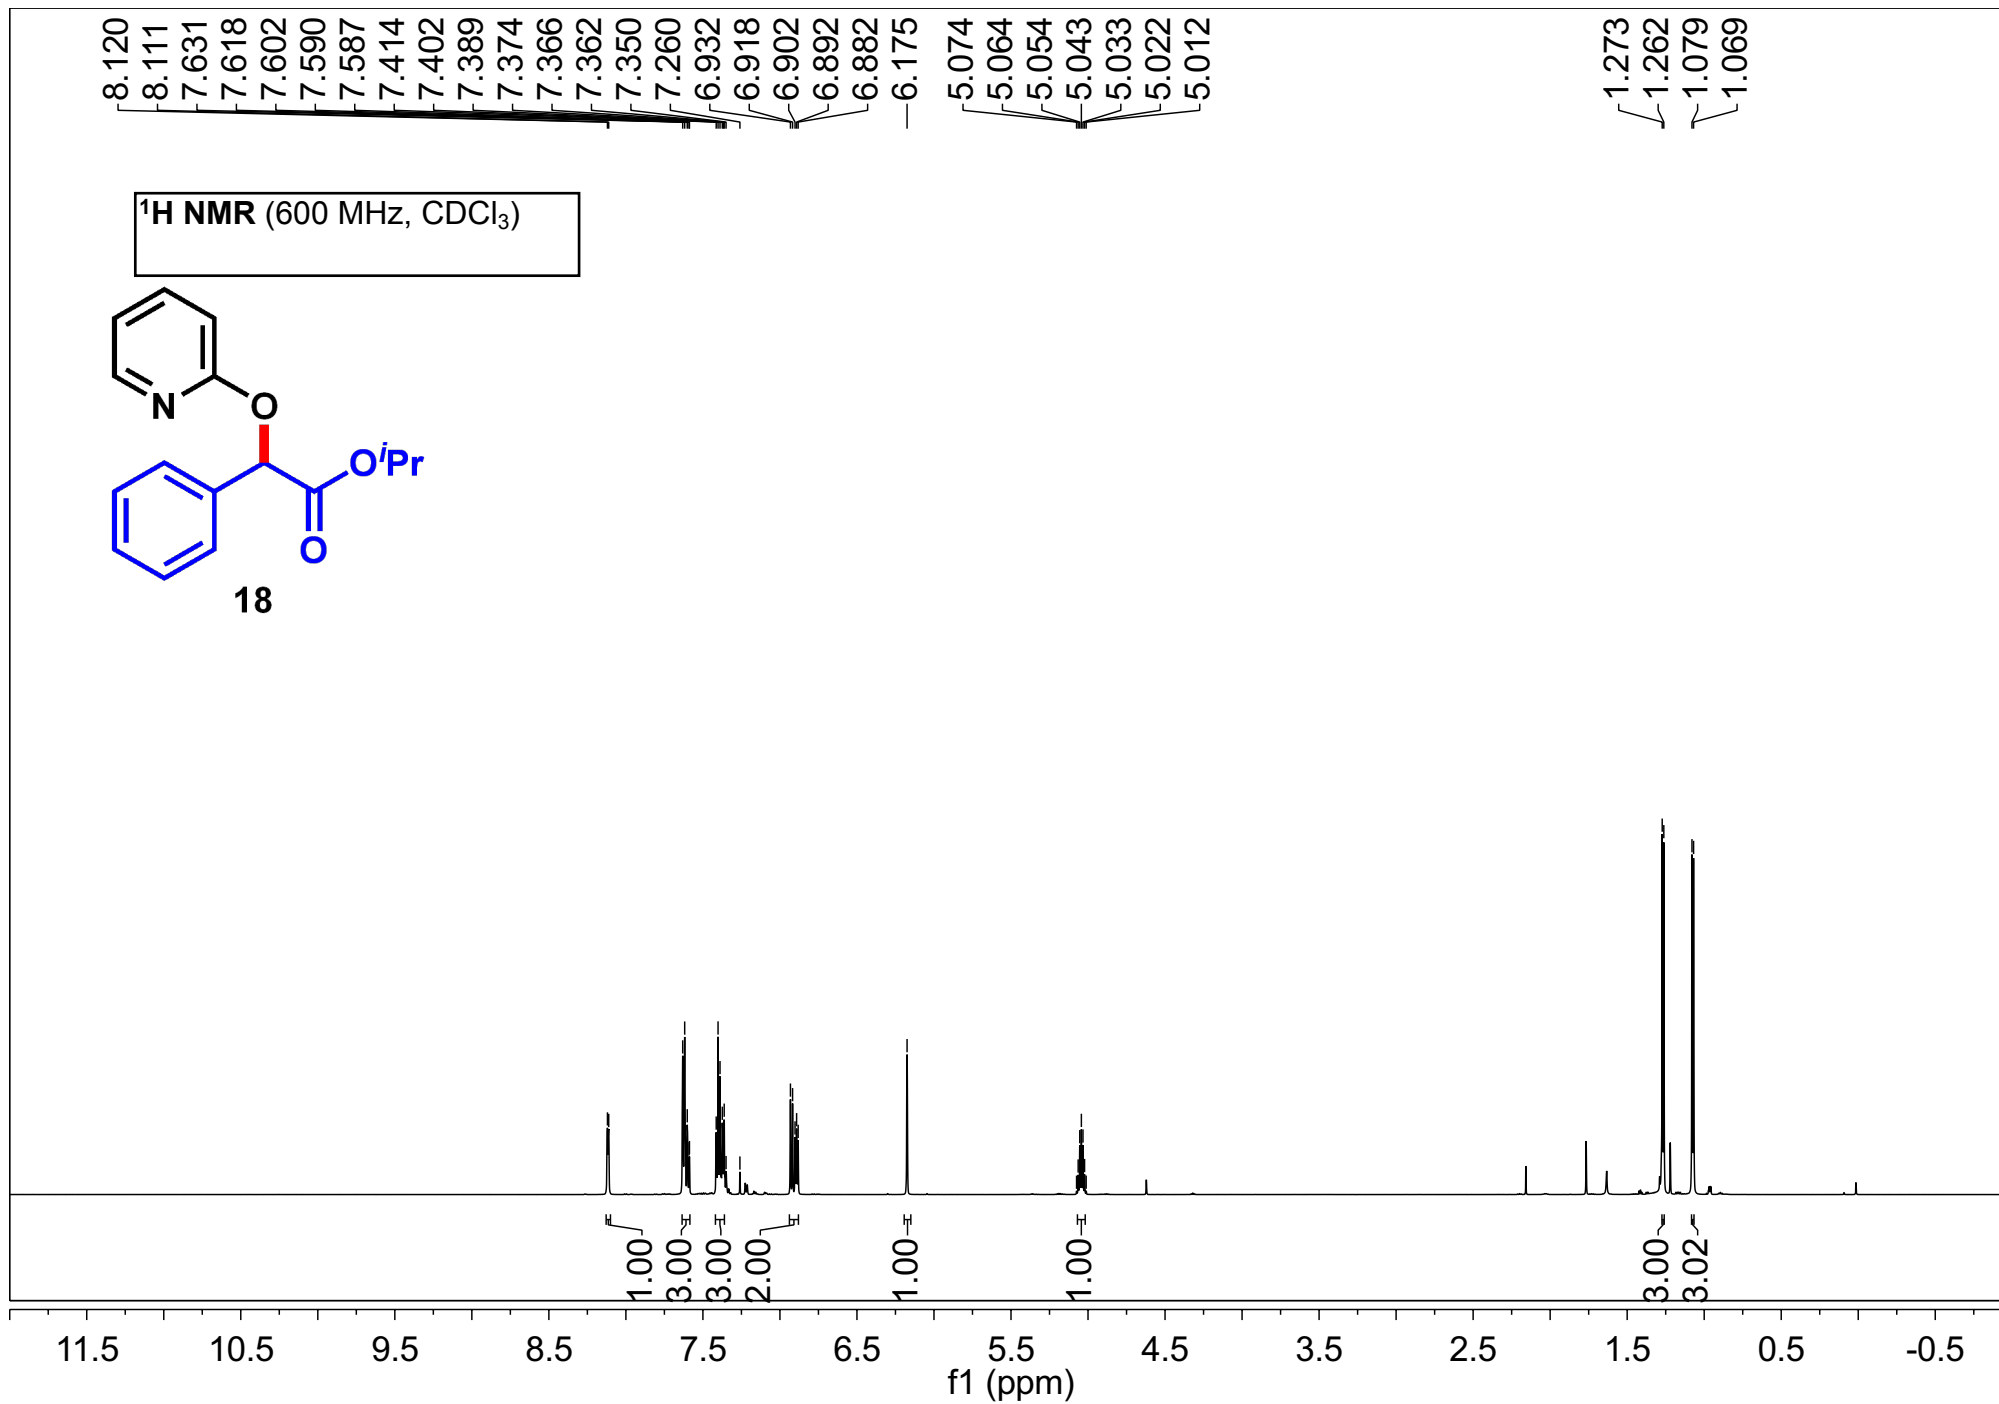



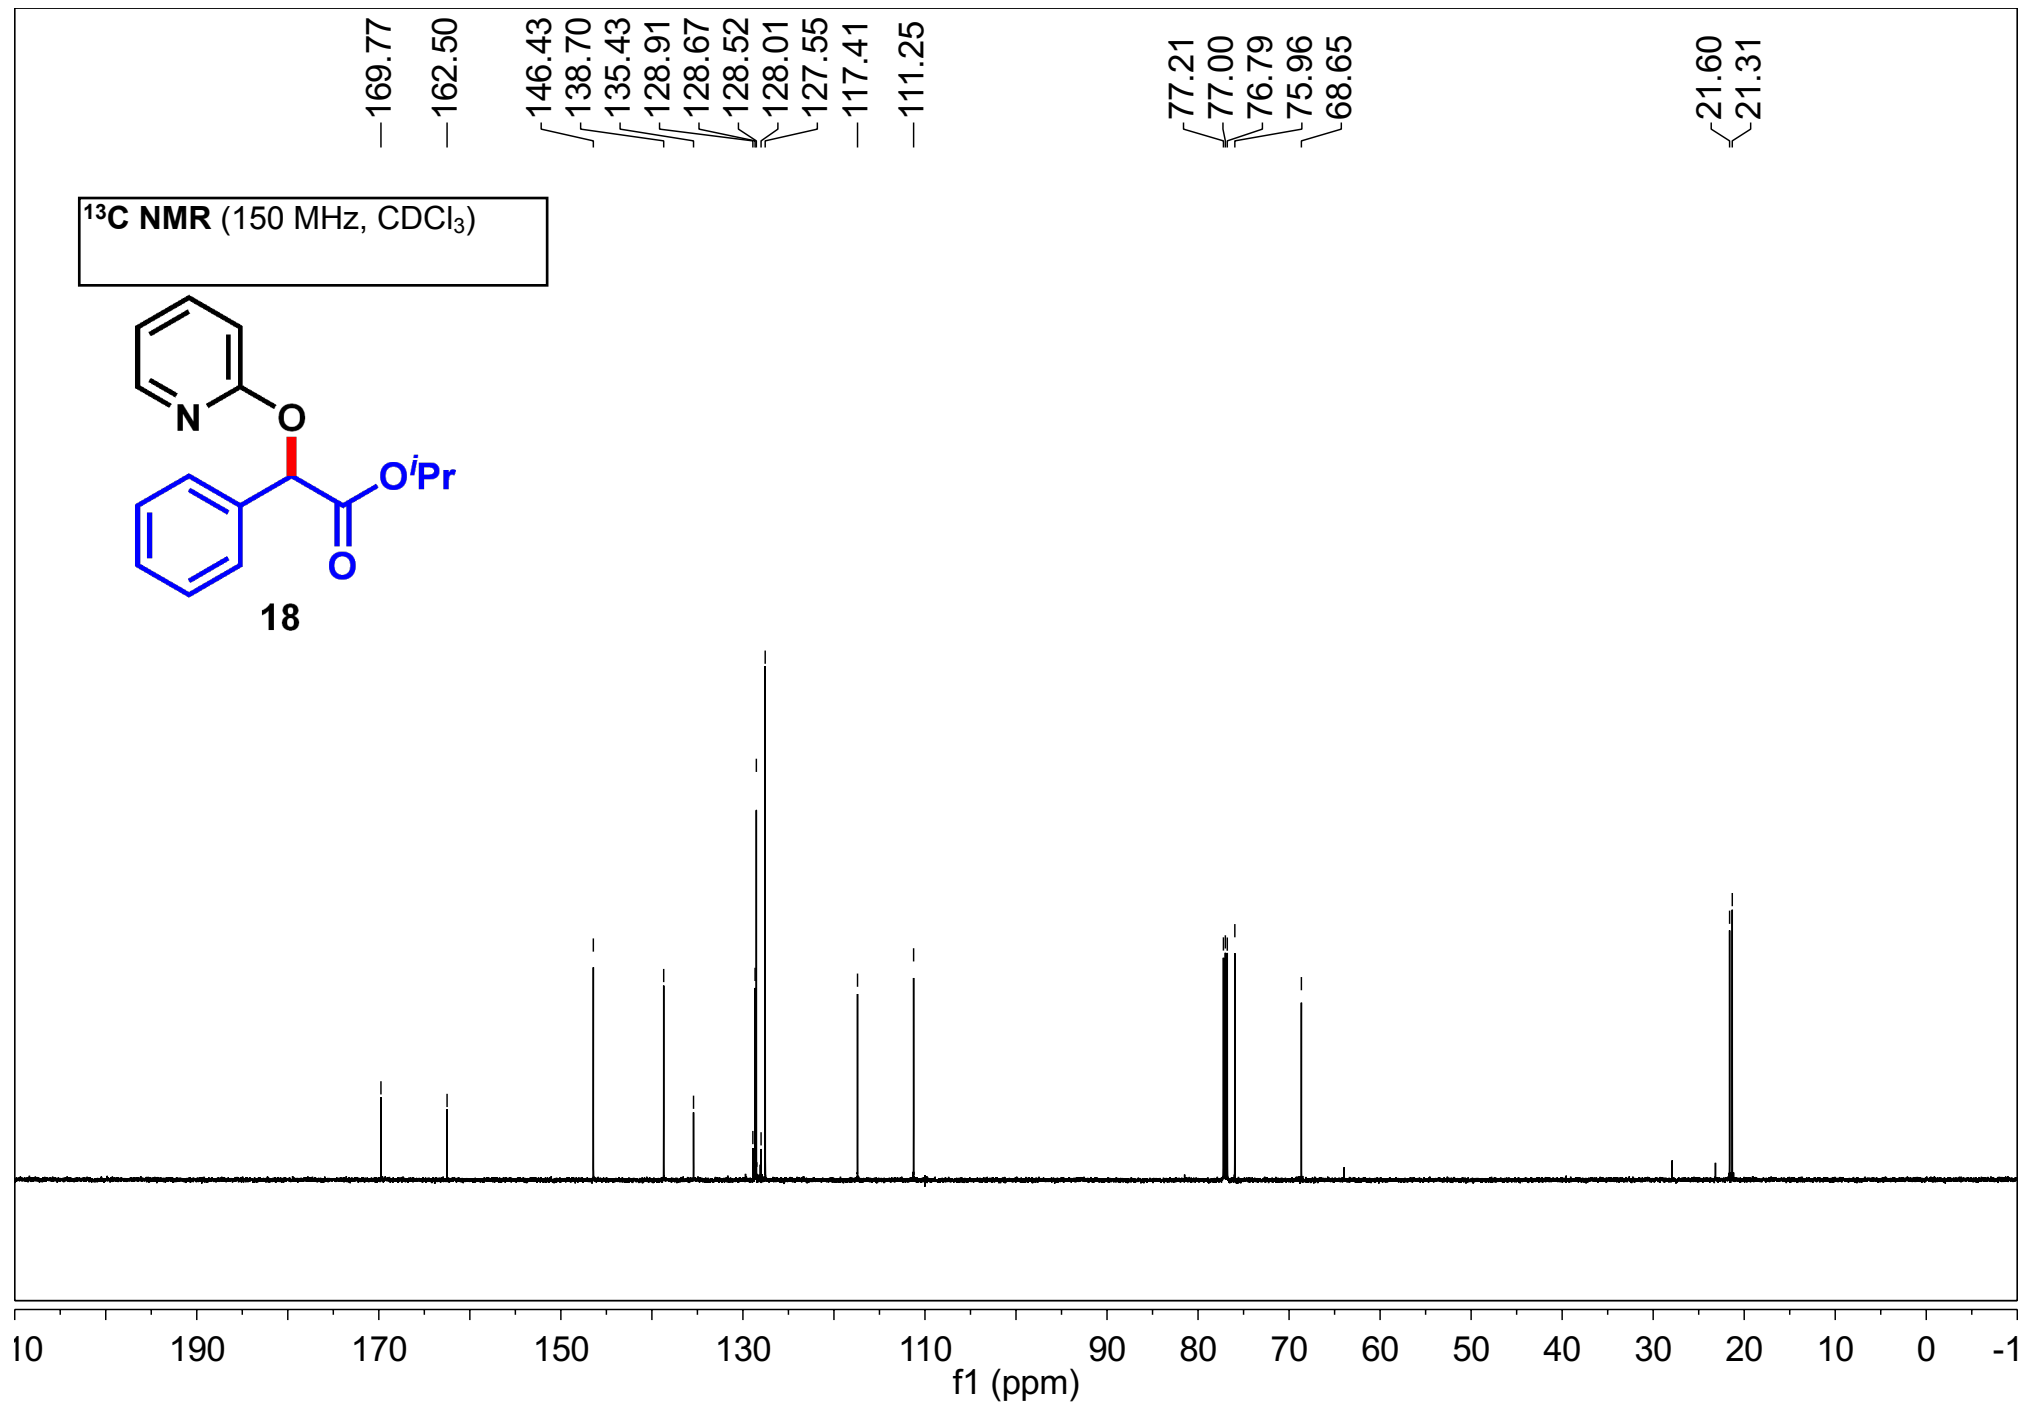

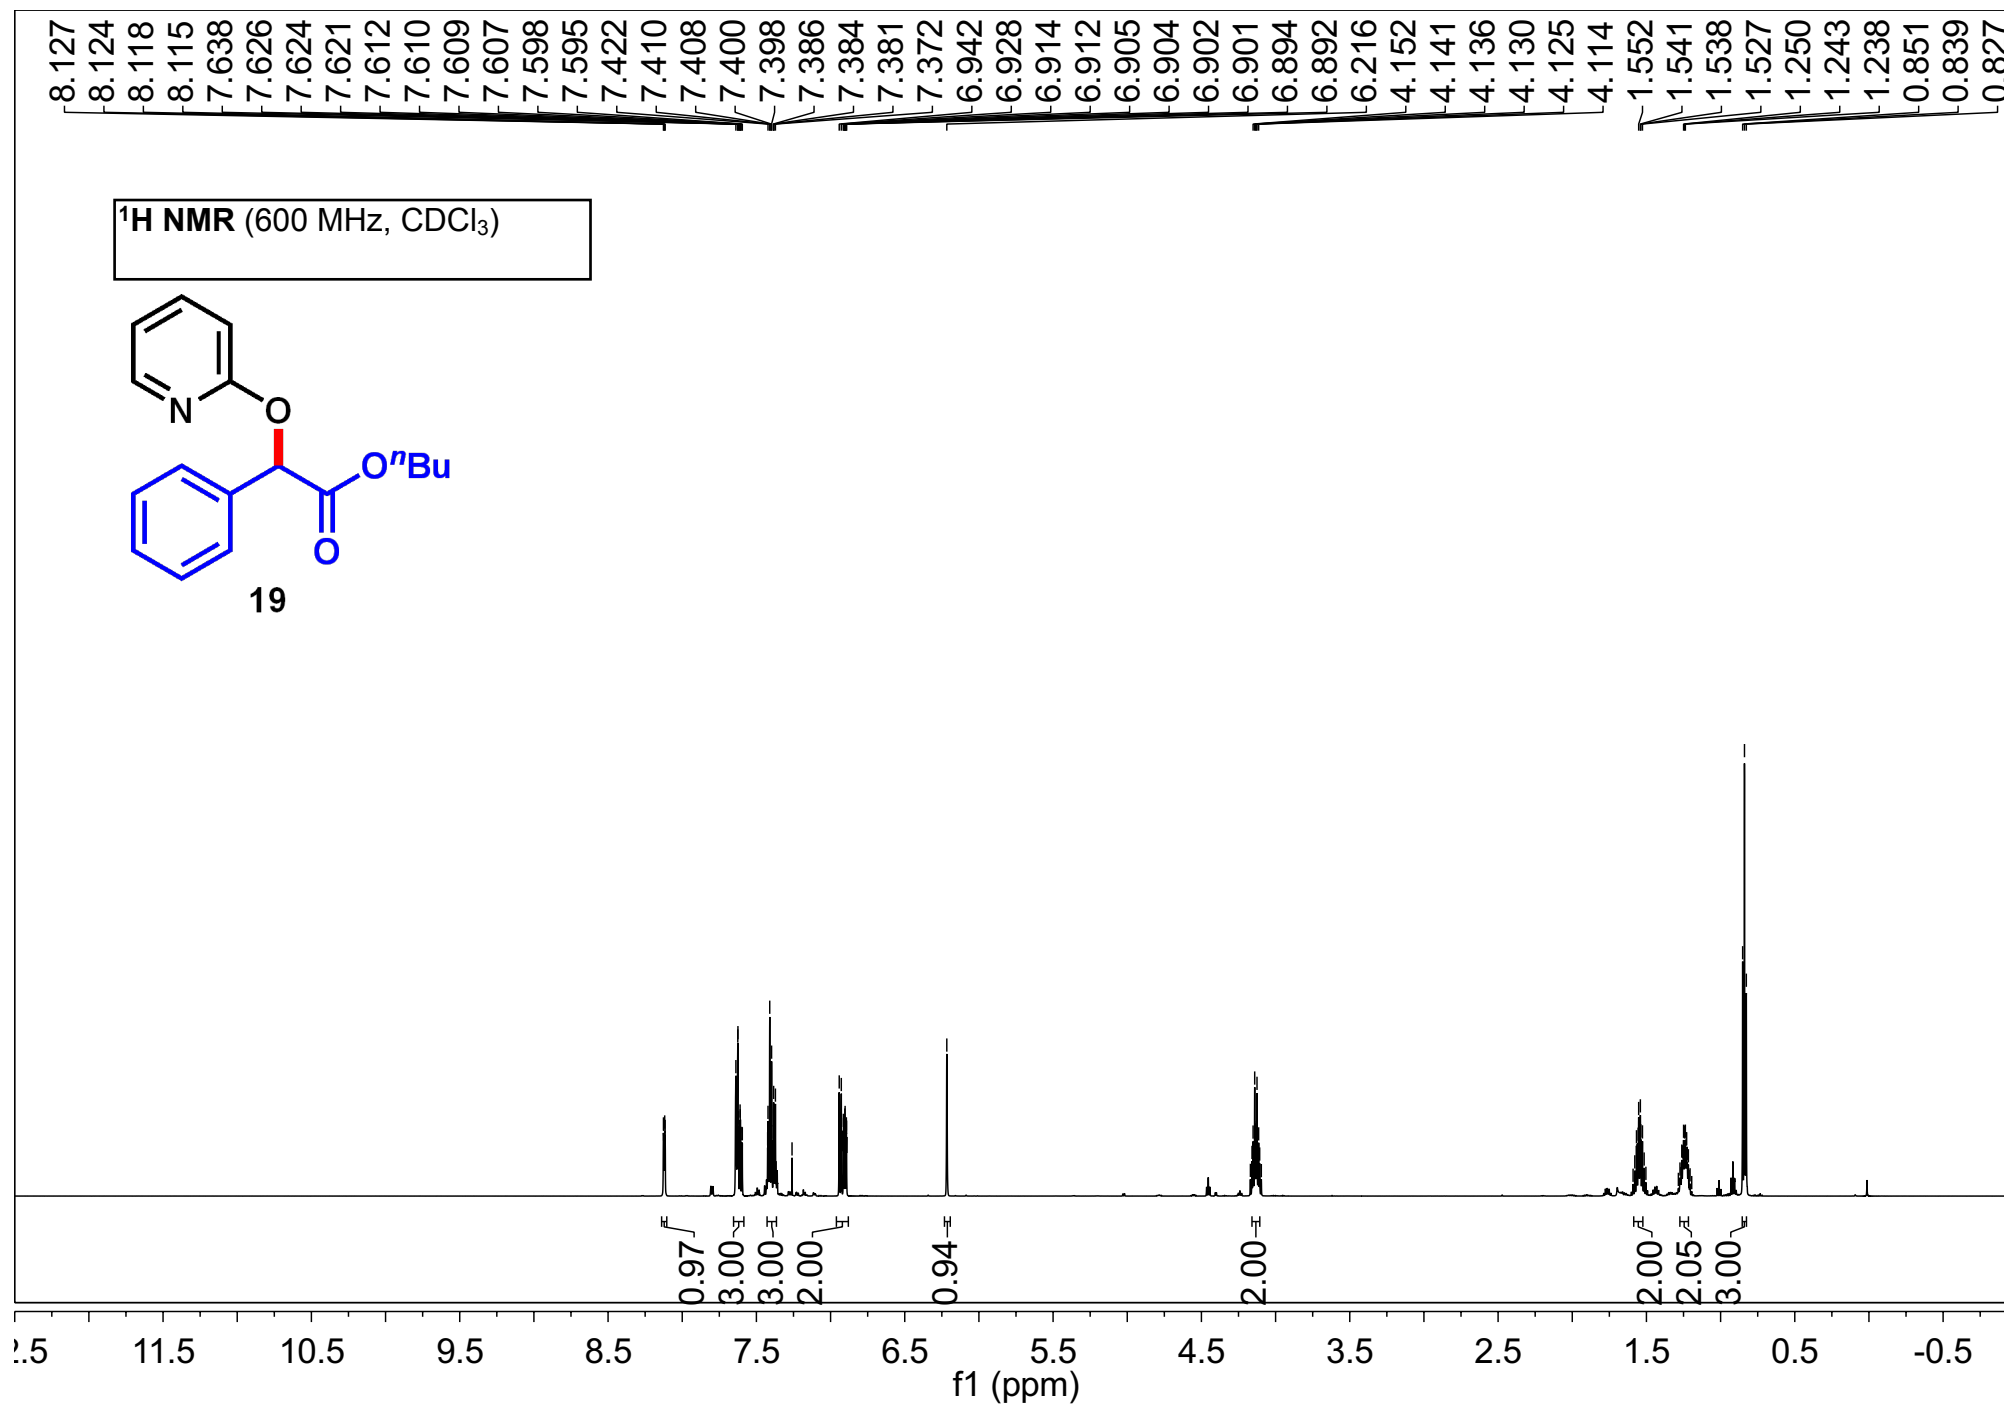

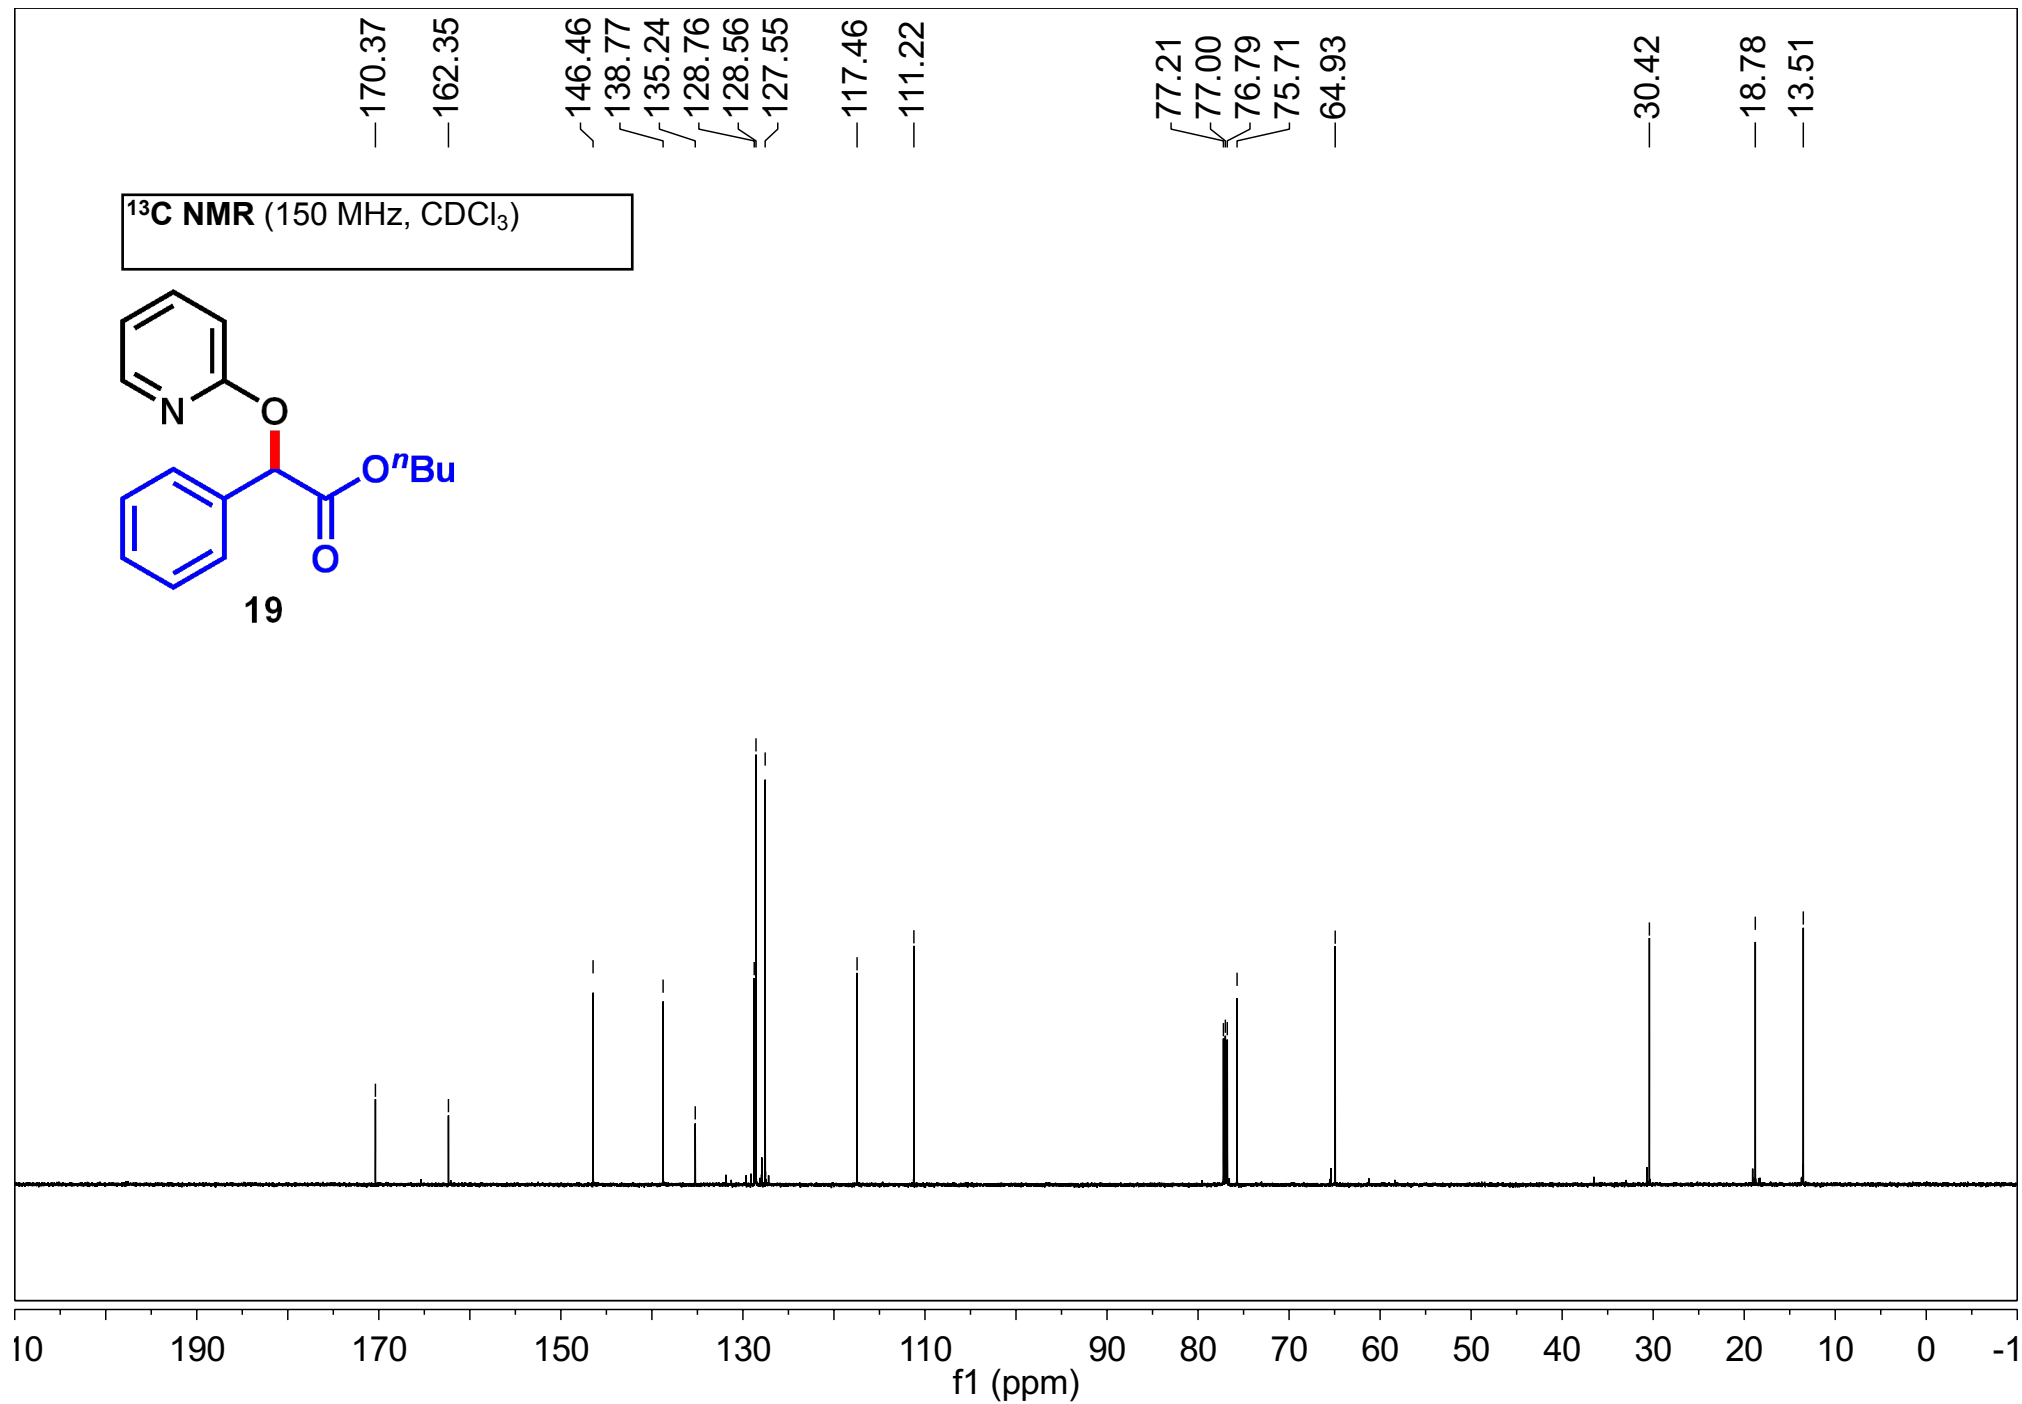

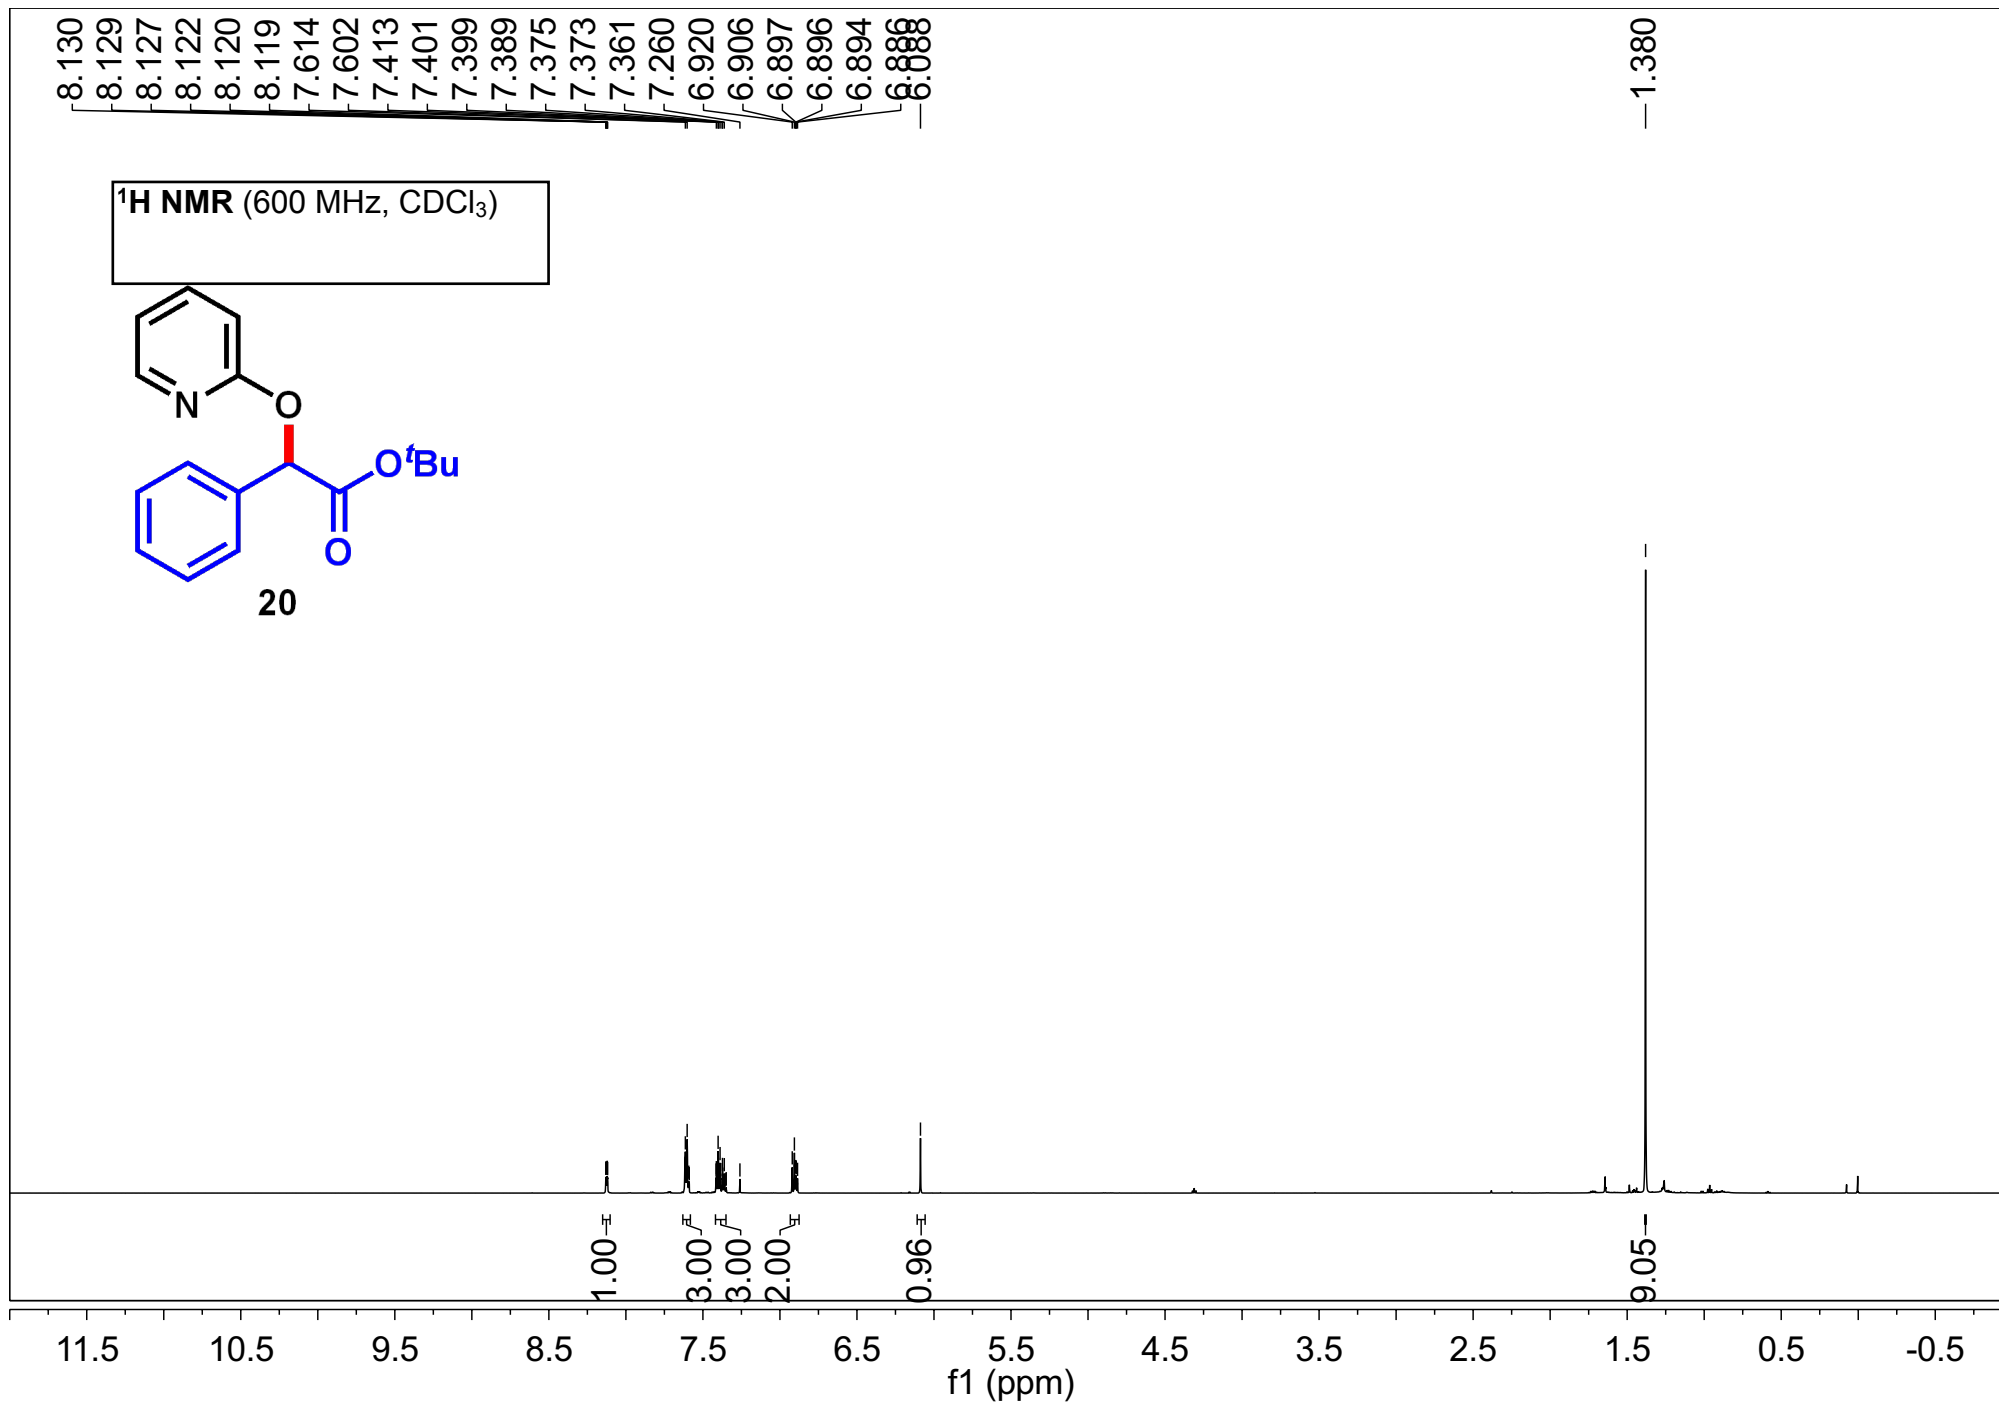

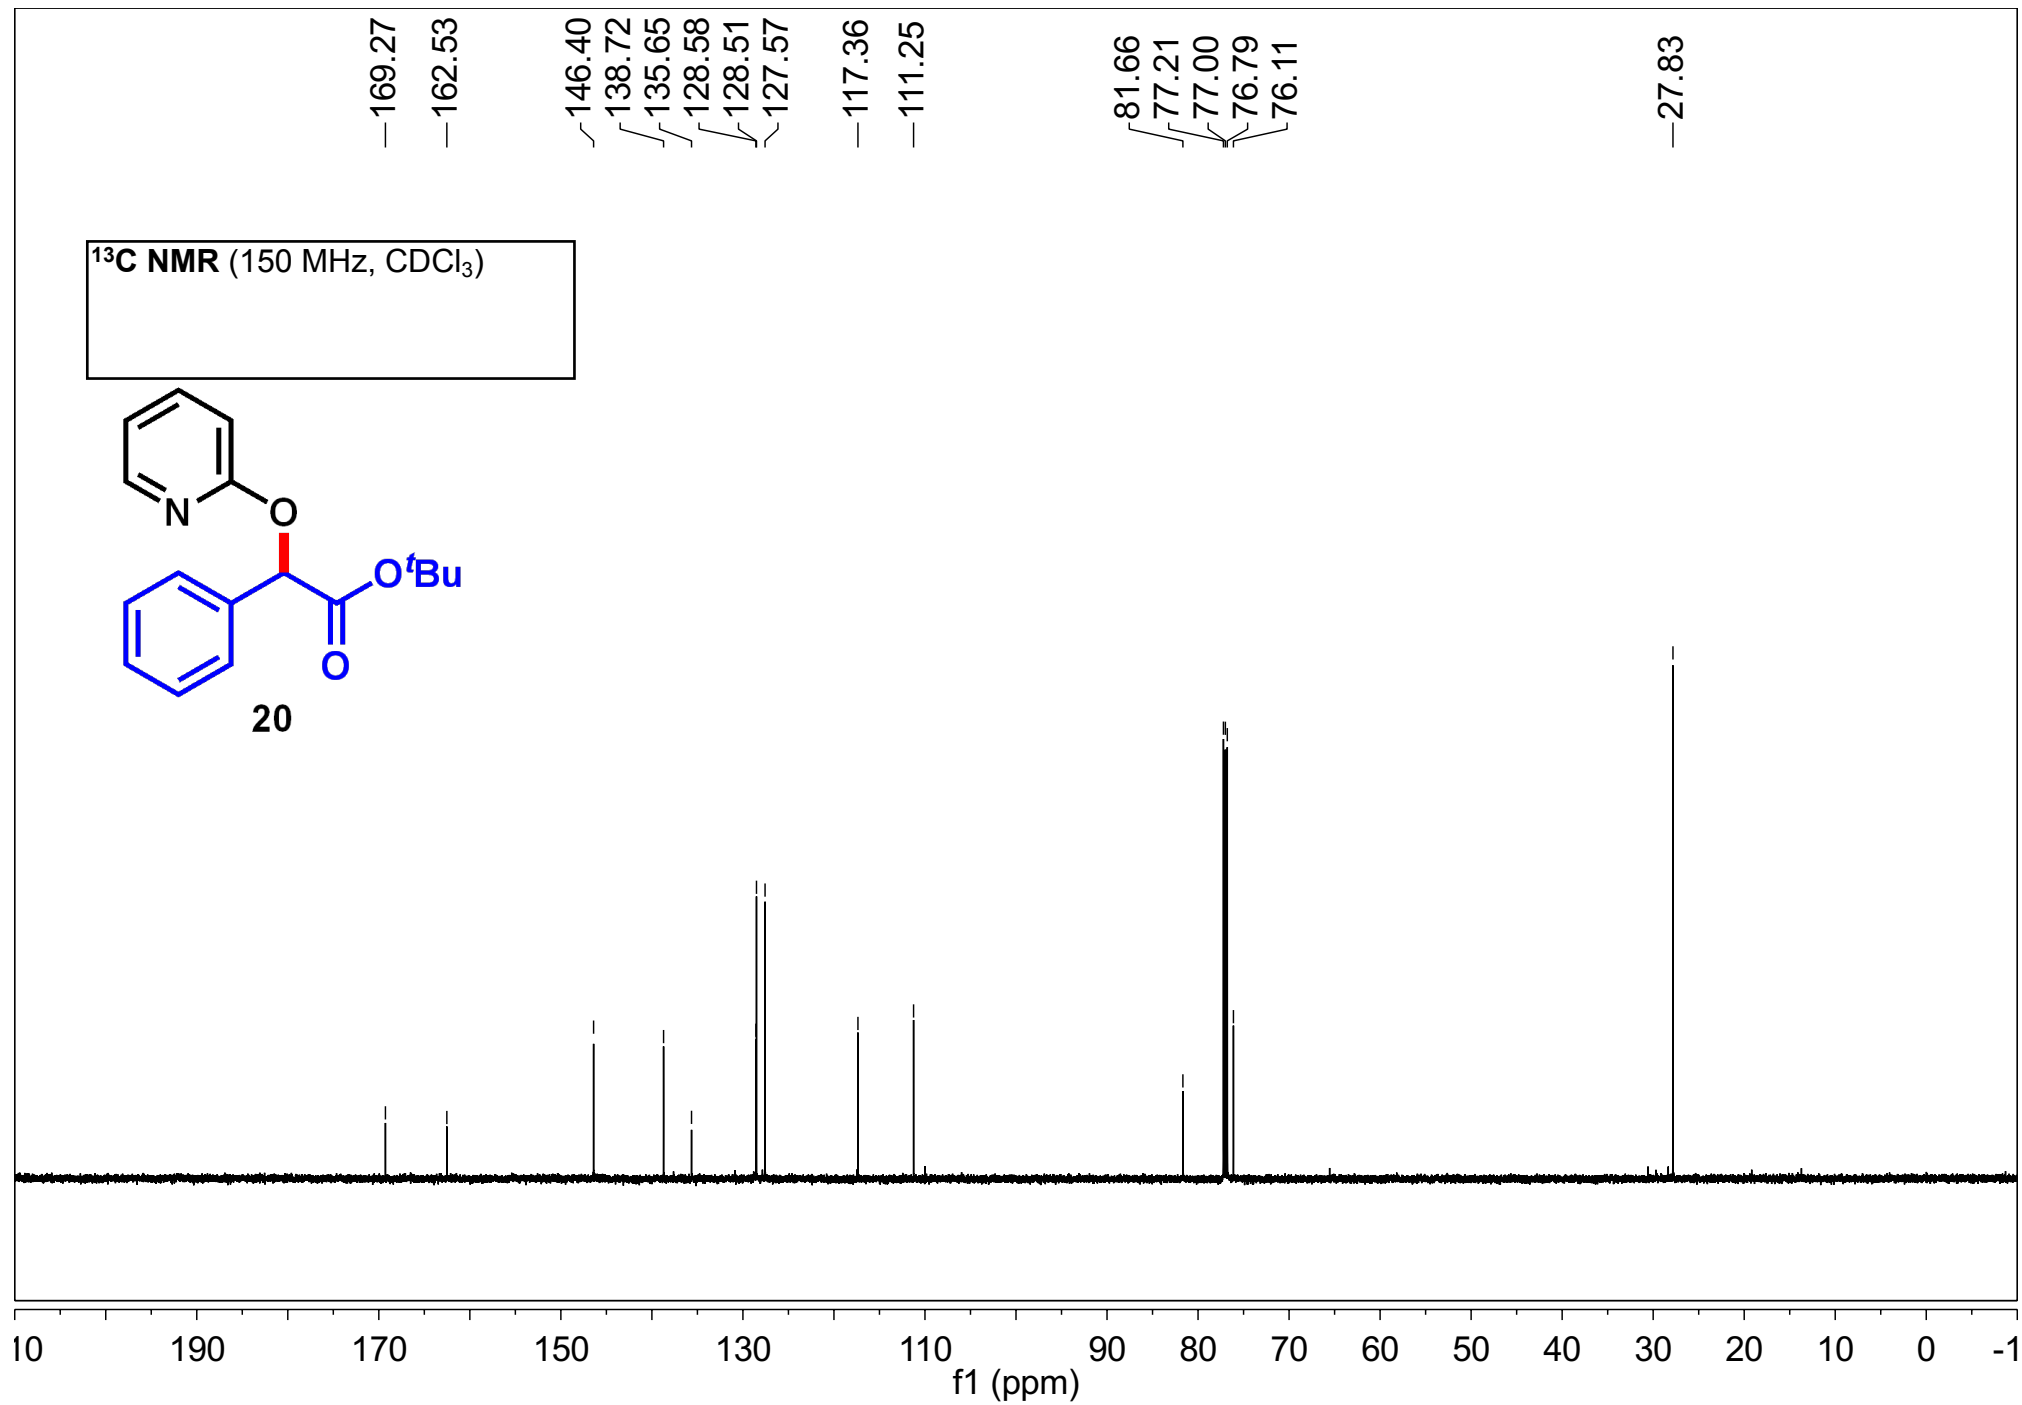

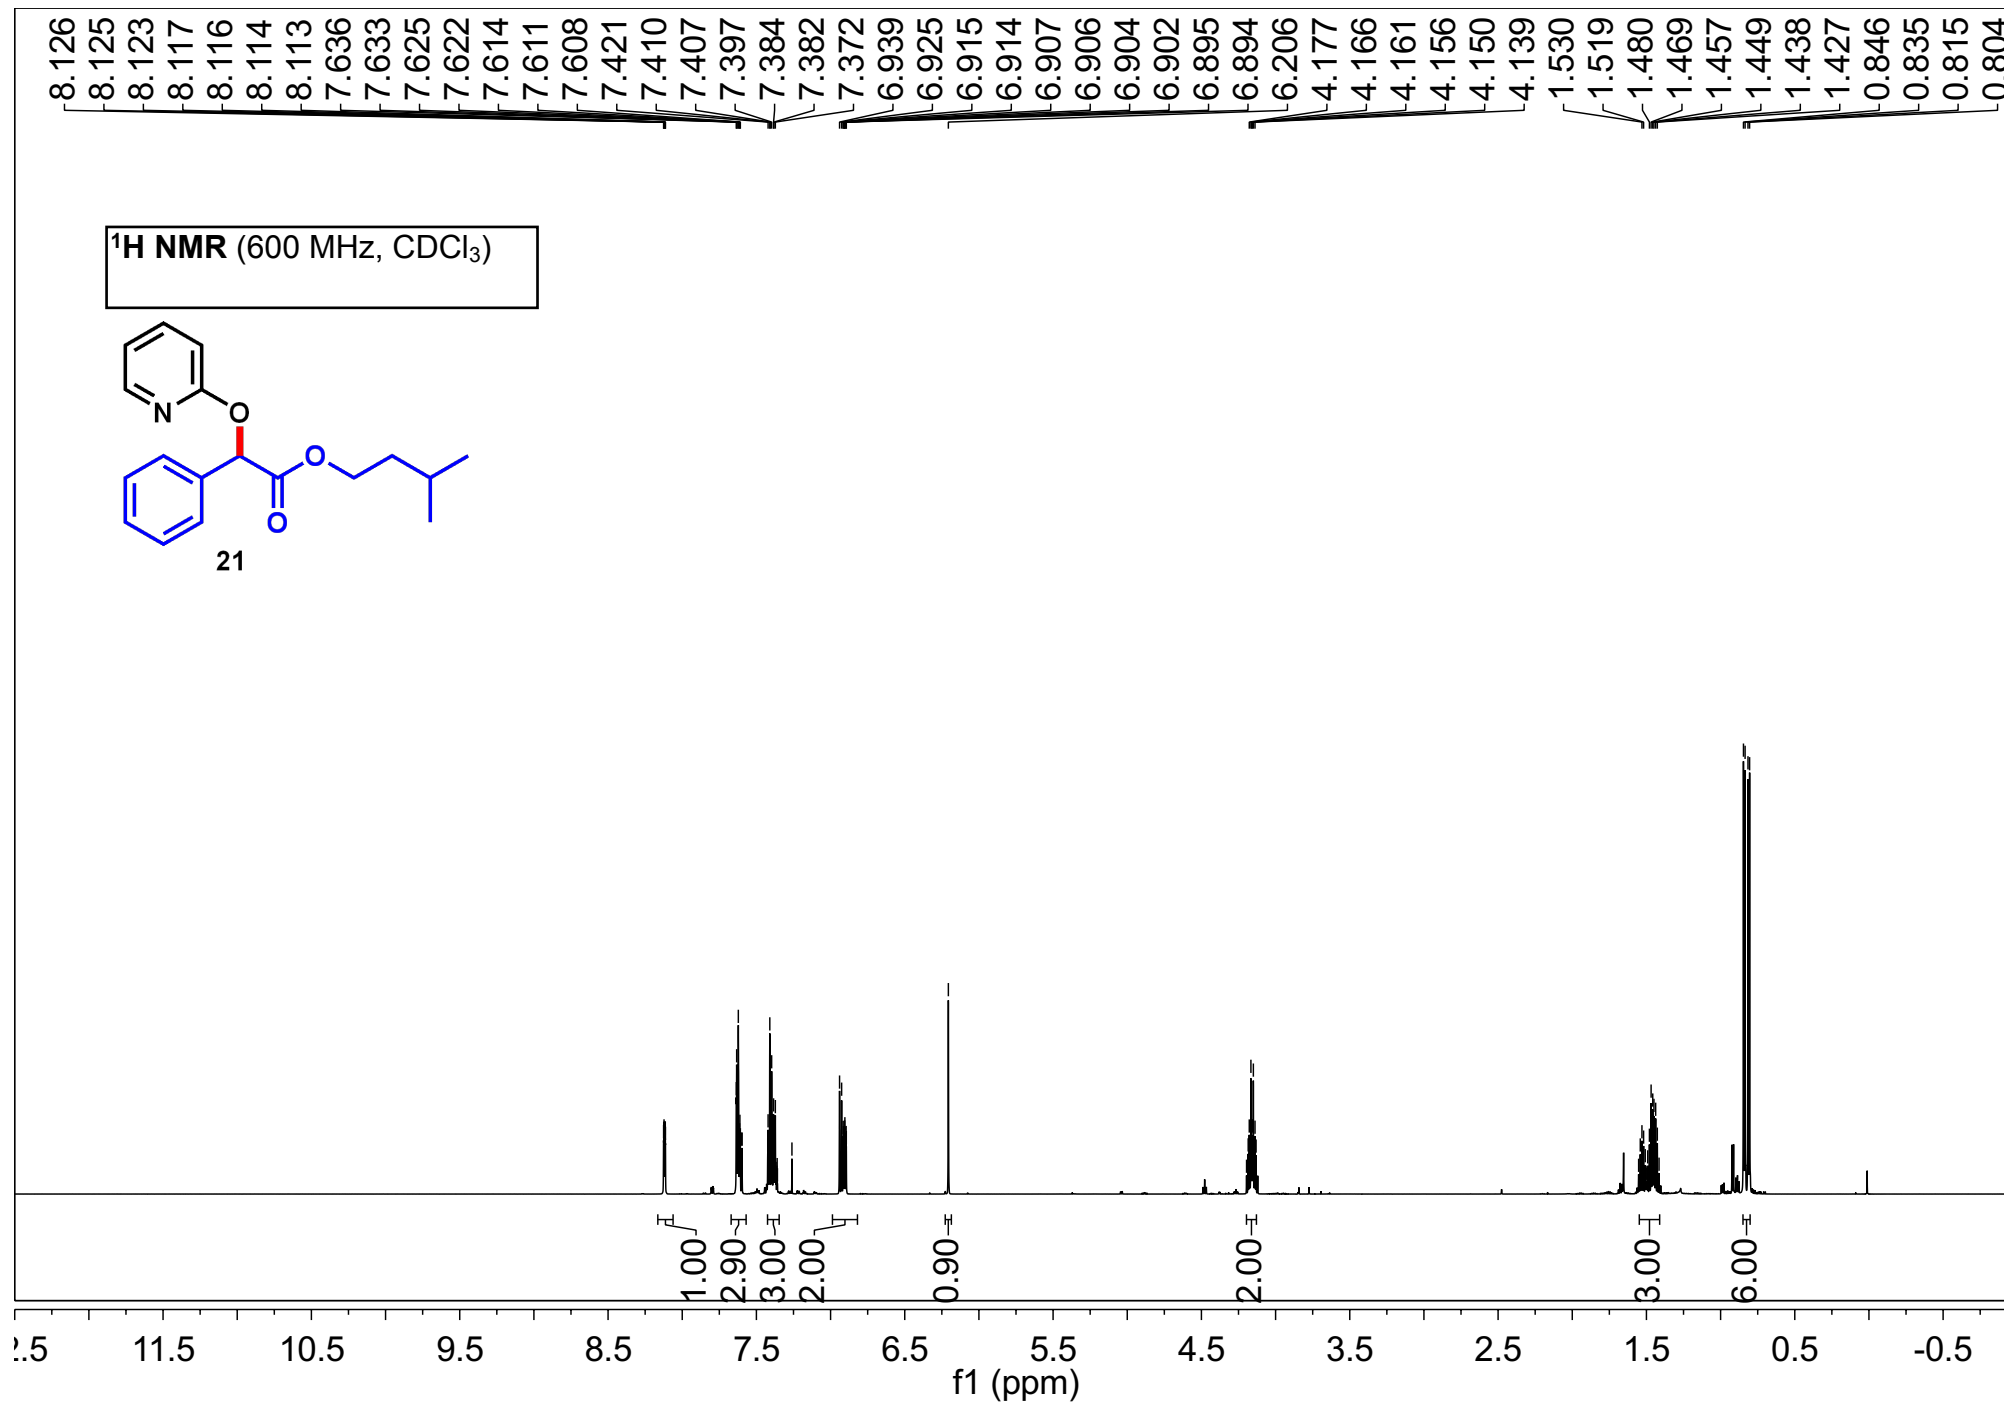

**<sup>13</sup>C NMR (150 MHz, CDCl<sub>3</sub>)**

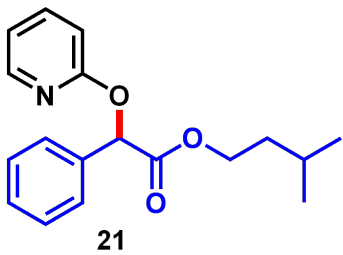

—170.38

—162.37

146.48

138.78

135.22

128.78

128.57

127.58

—117.47

—111.23

77.21

77.00

76.79

75.73

—63.77

—37.07

24.76

22.32

22.20

210

190

170

150

130

110

90

80

70

60

50

40

30

20

10

0

f1 (ppm)

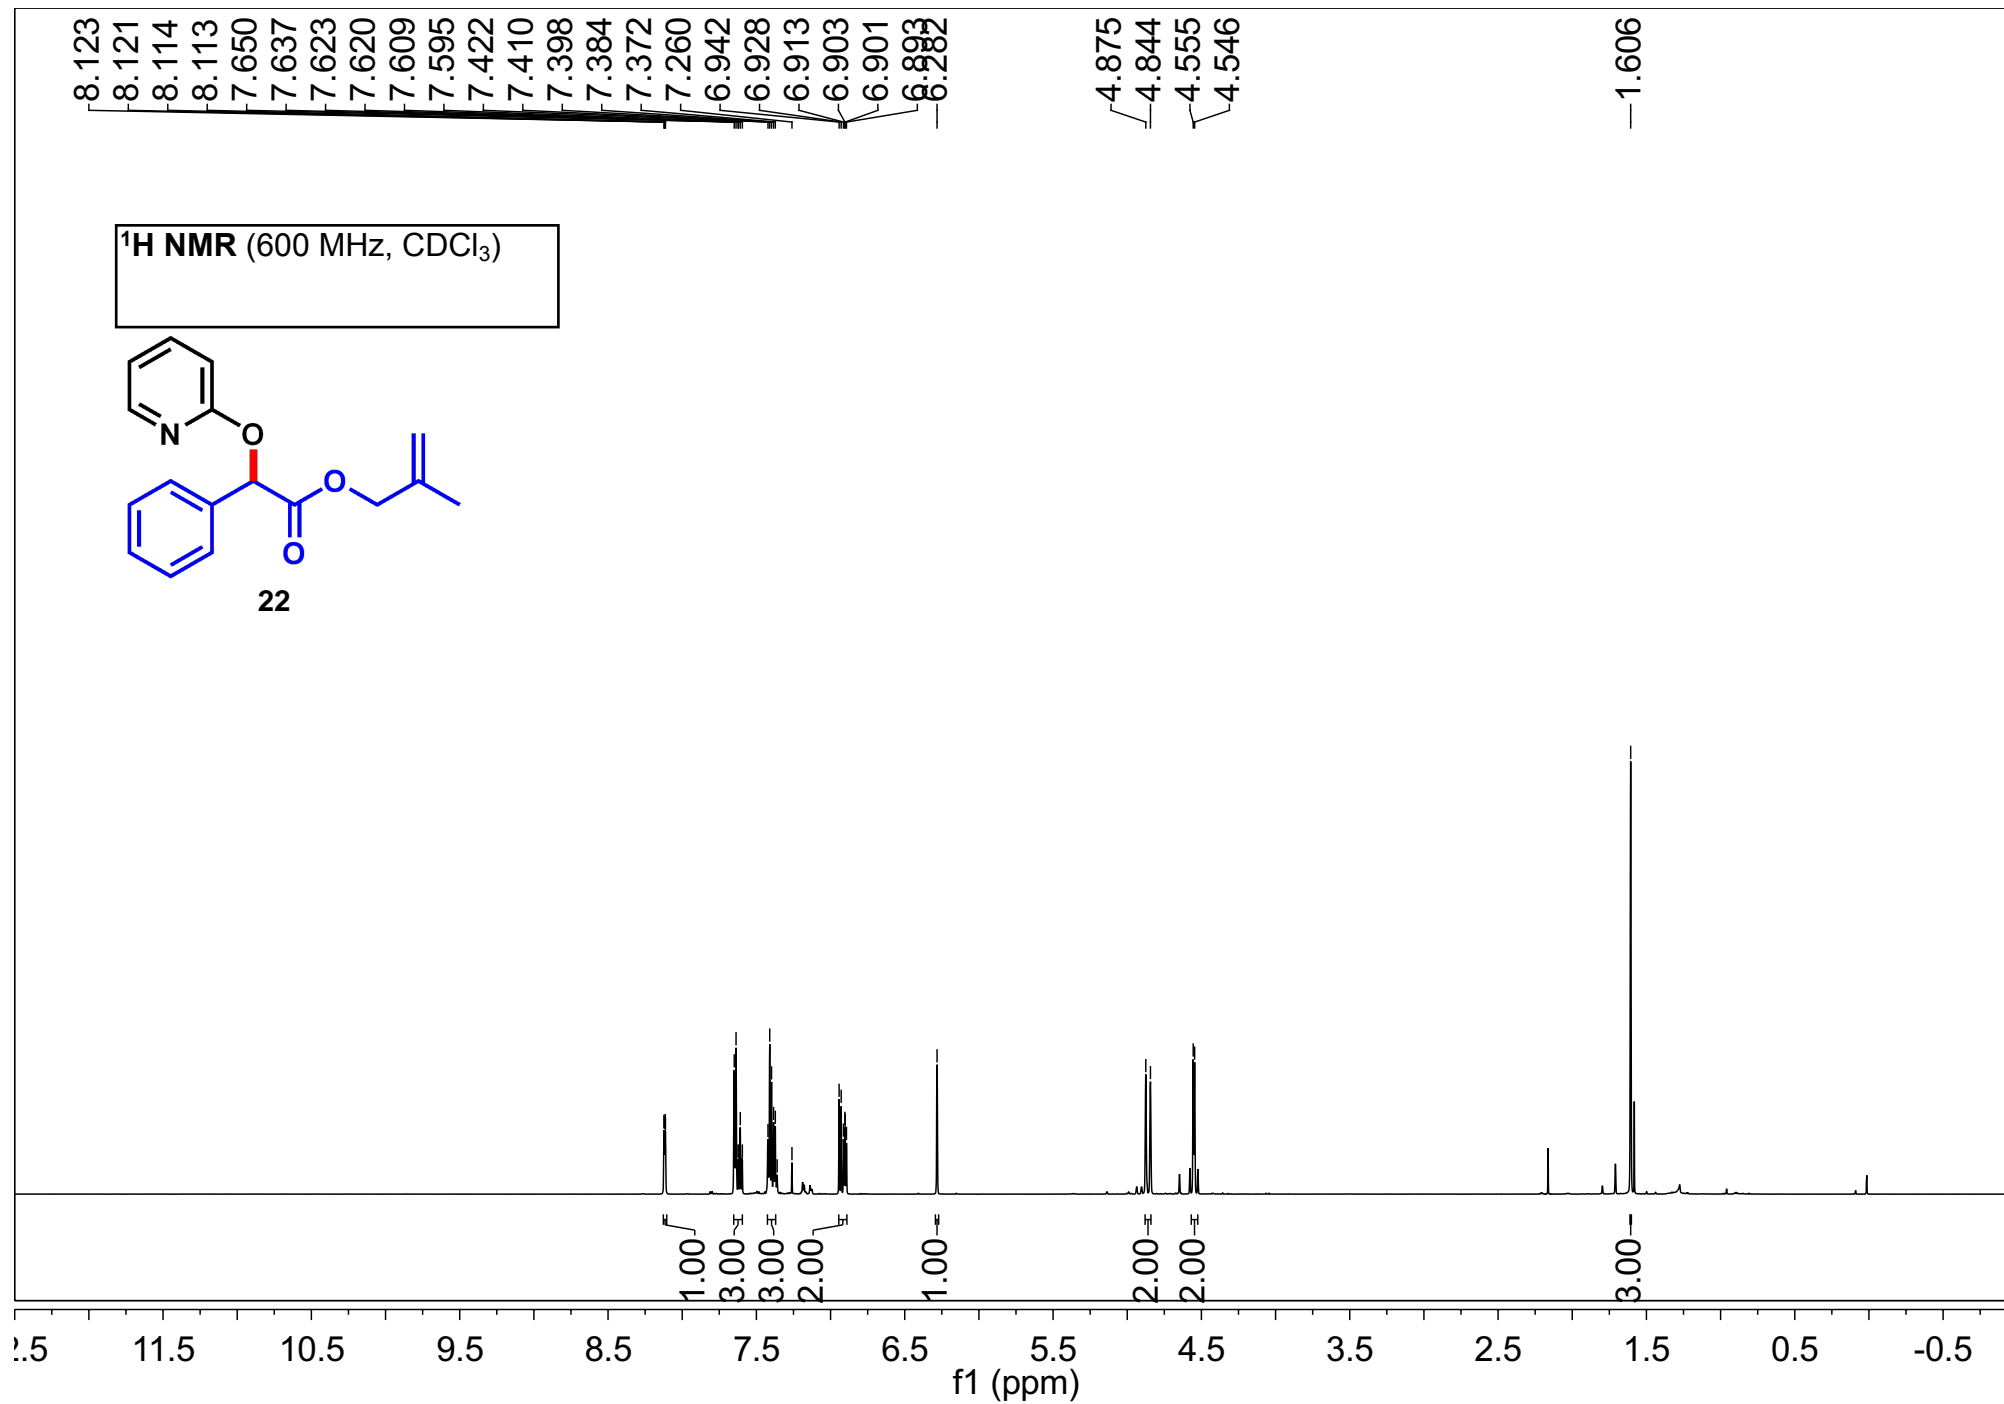



**<sup>13</sup>C NMR (150 MHz, CDCl<sub>3</sub>)**

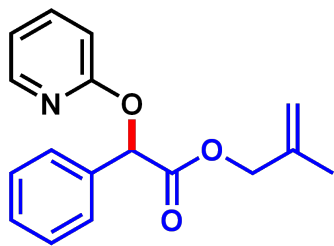

—169.99  
—162.42  
146.53  
139.62  
138.80  
135.28  
129.69  
128.84  
128.61  
127.67  
117.53  
112.97  
111.27

77.21  
77.00  
76.79  
75.71  
68.18

—19.09



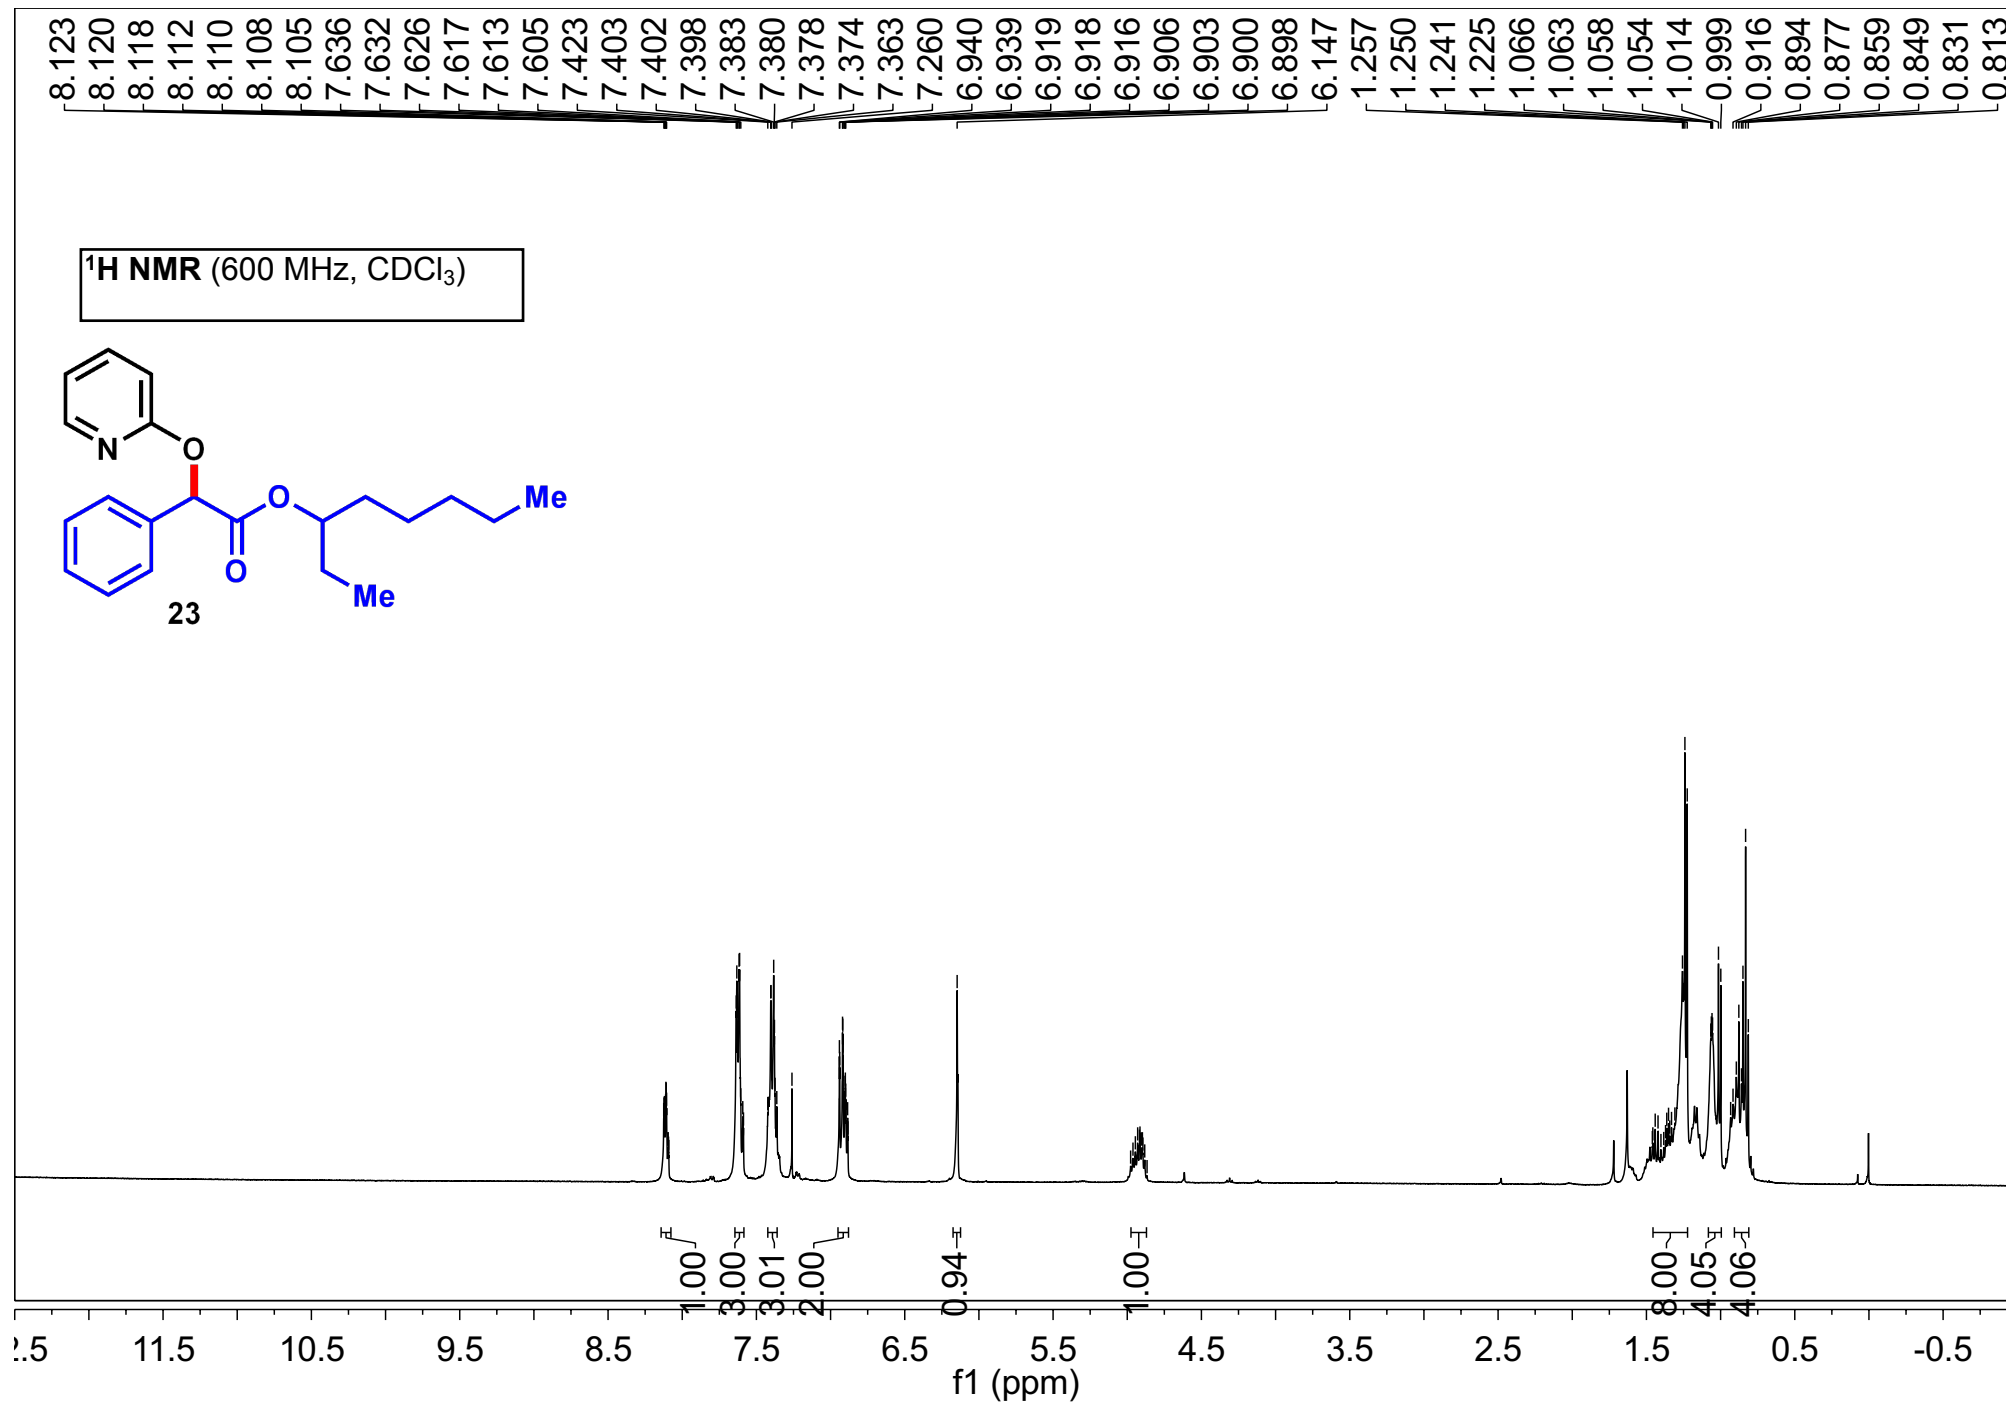

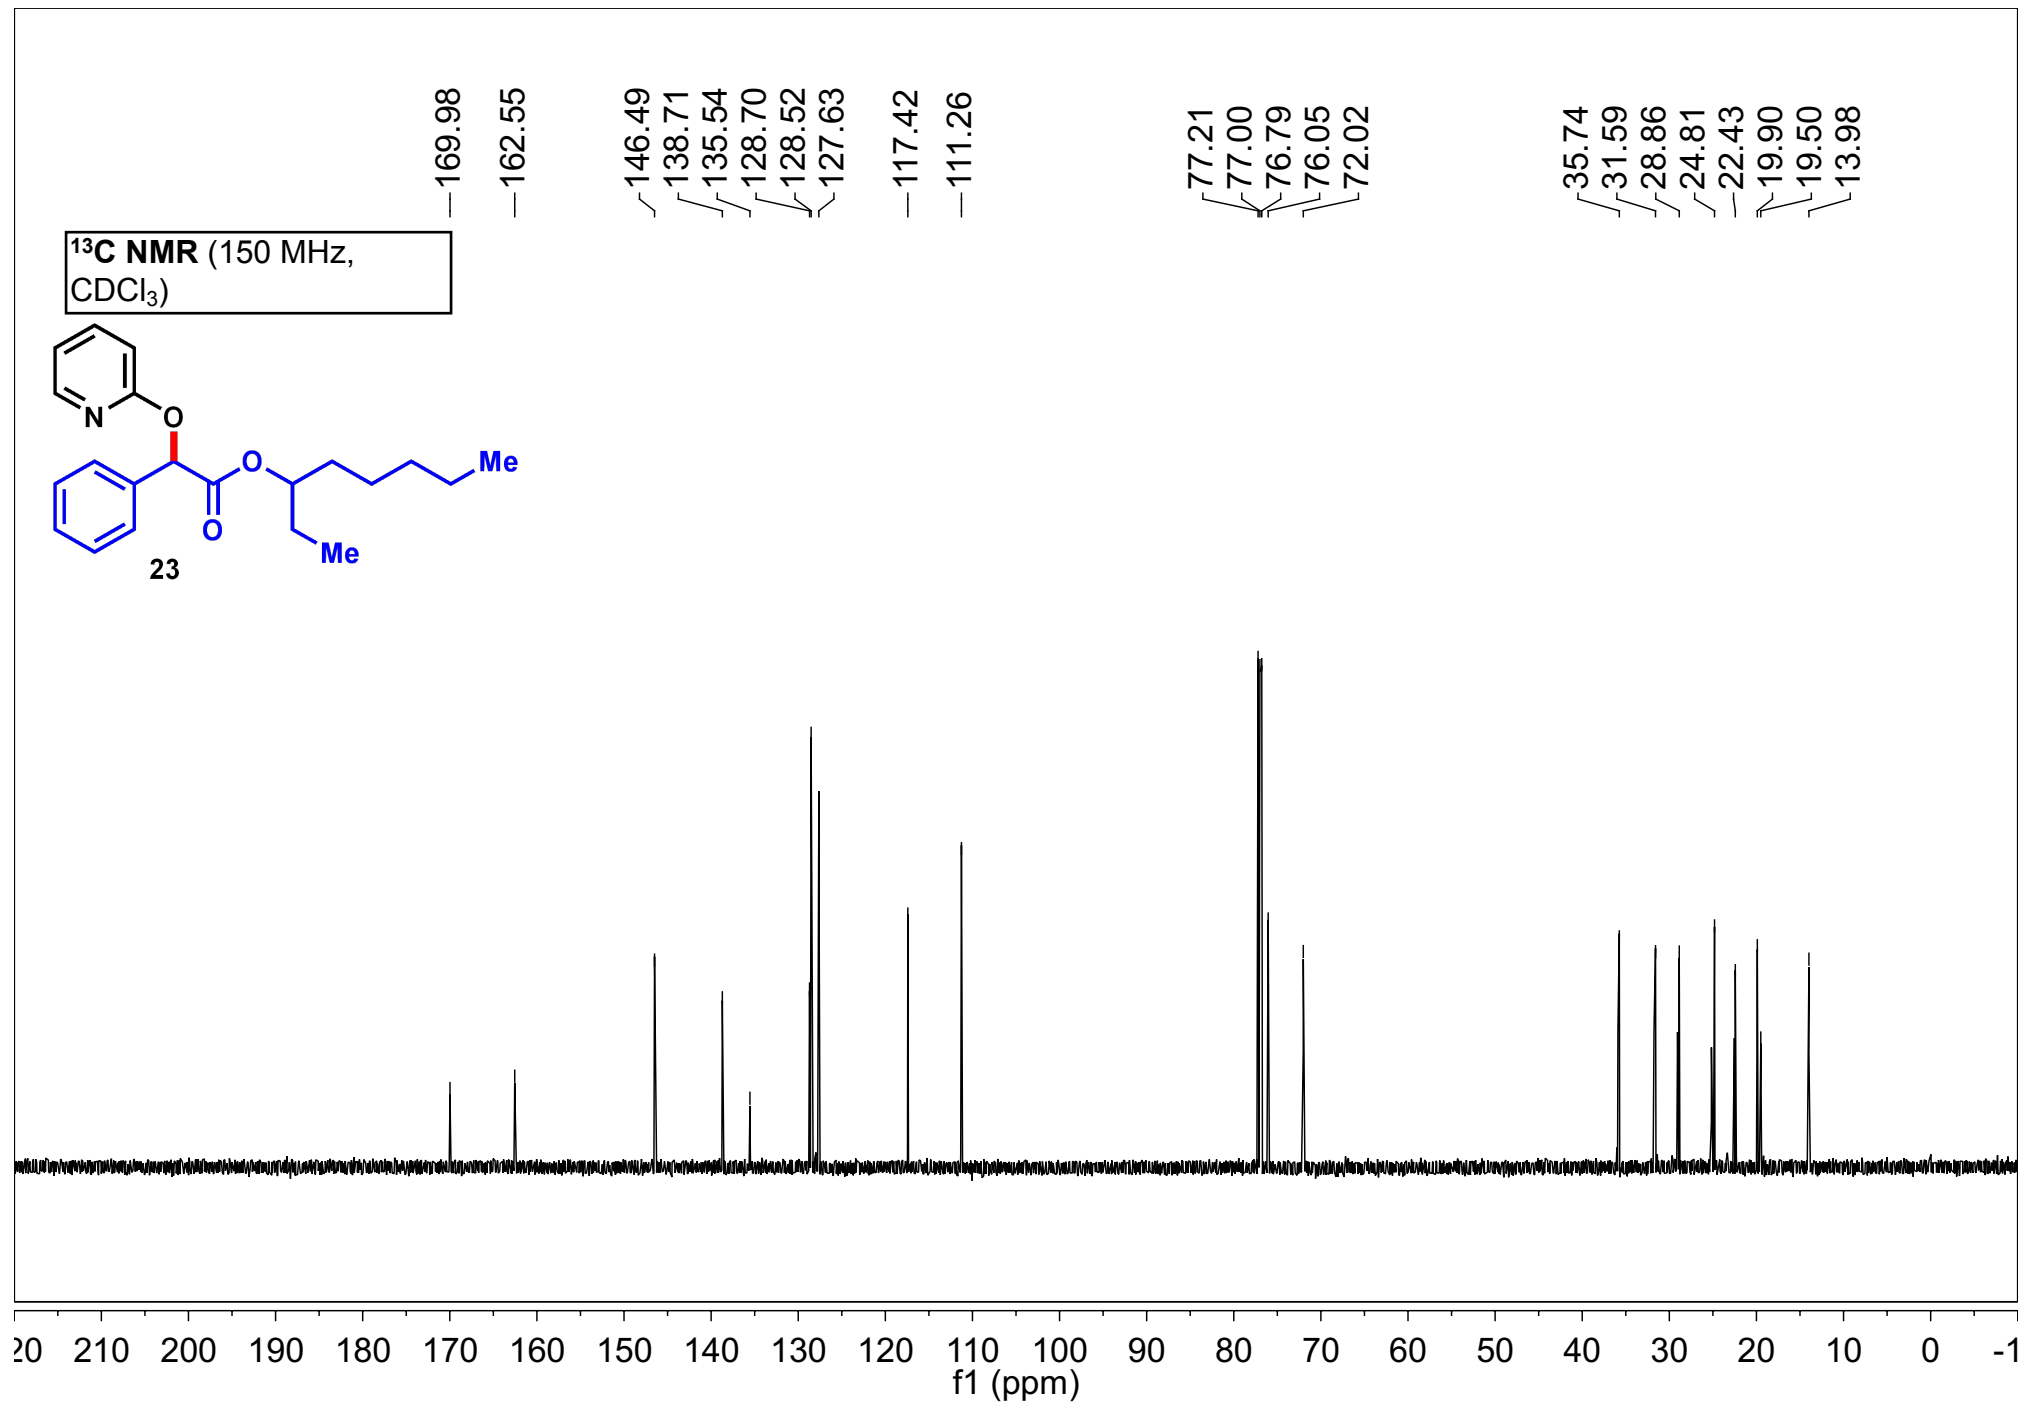

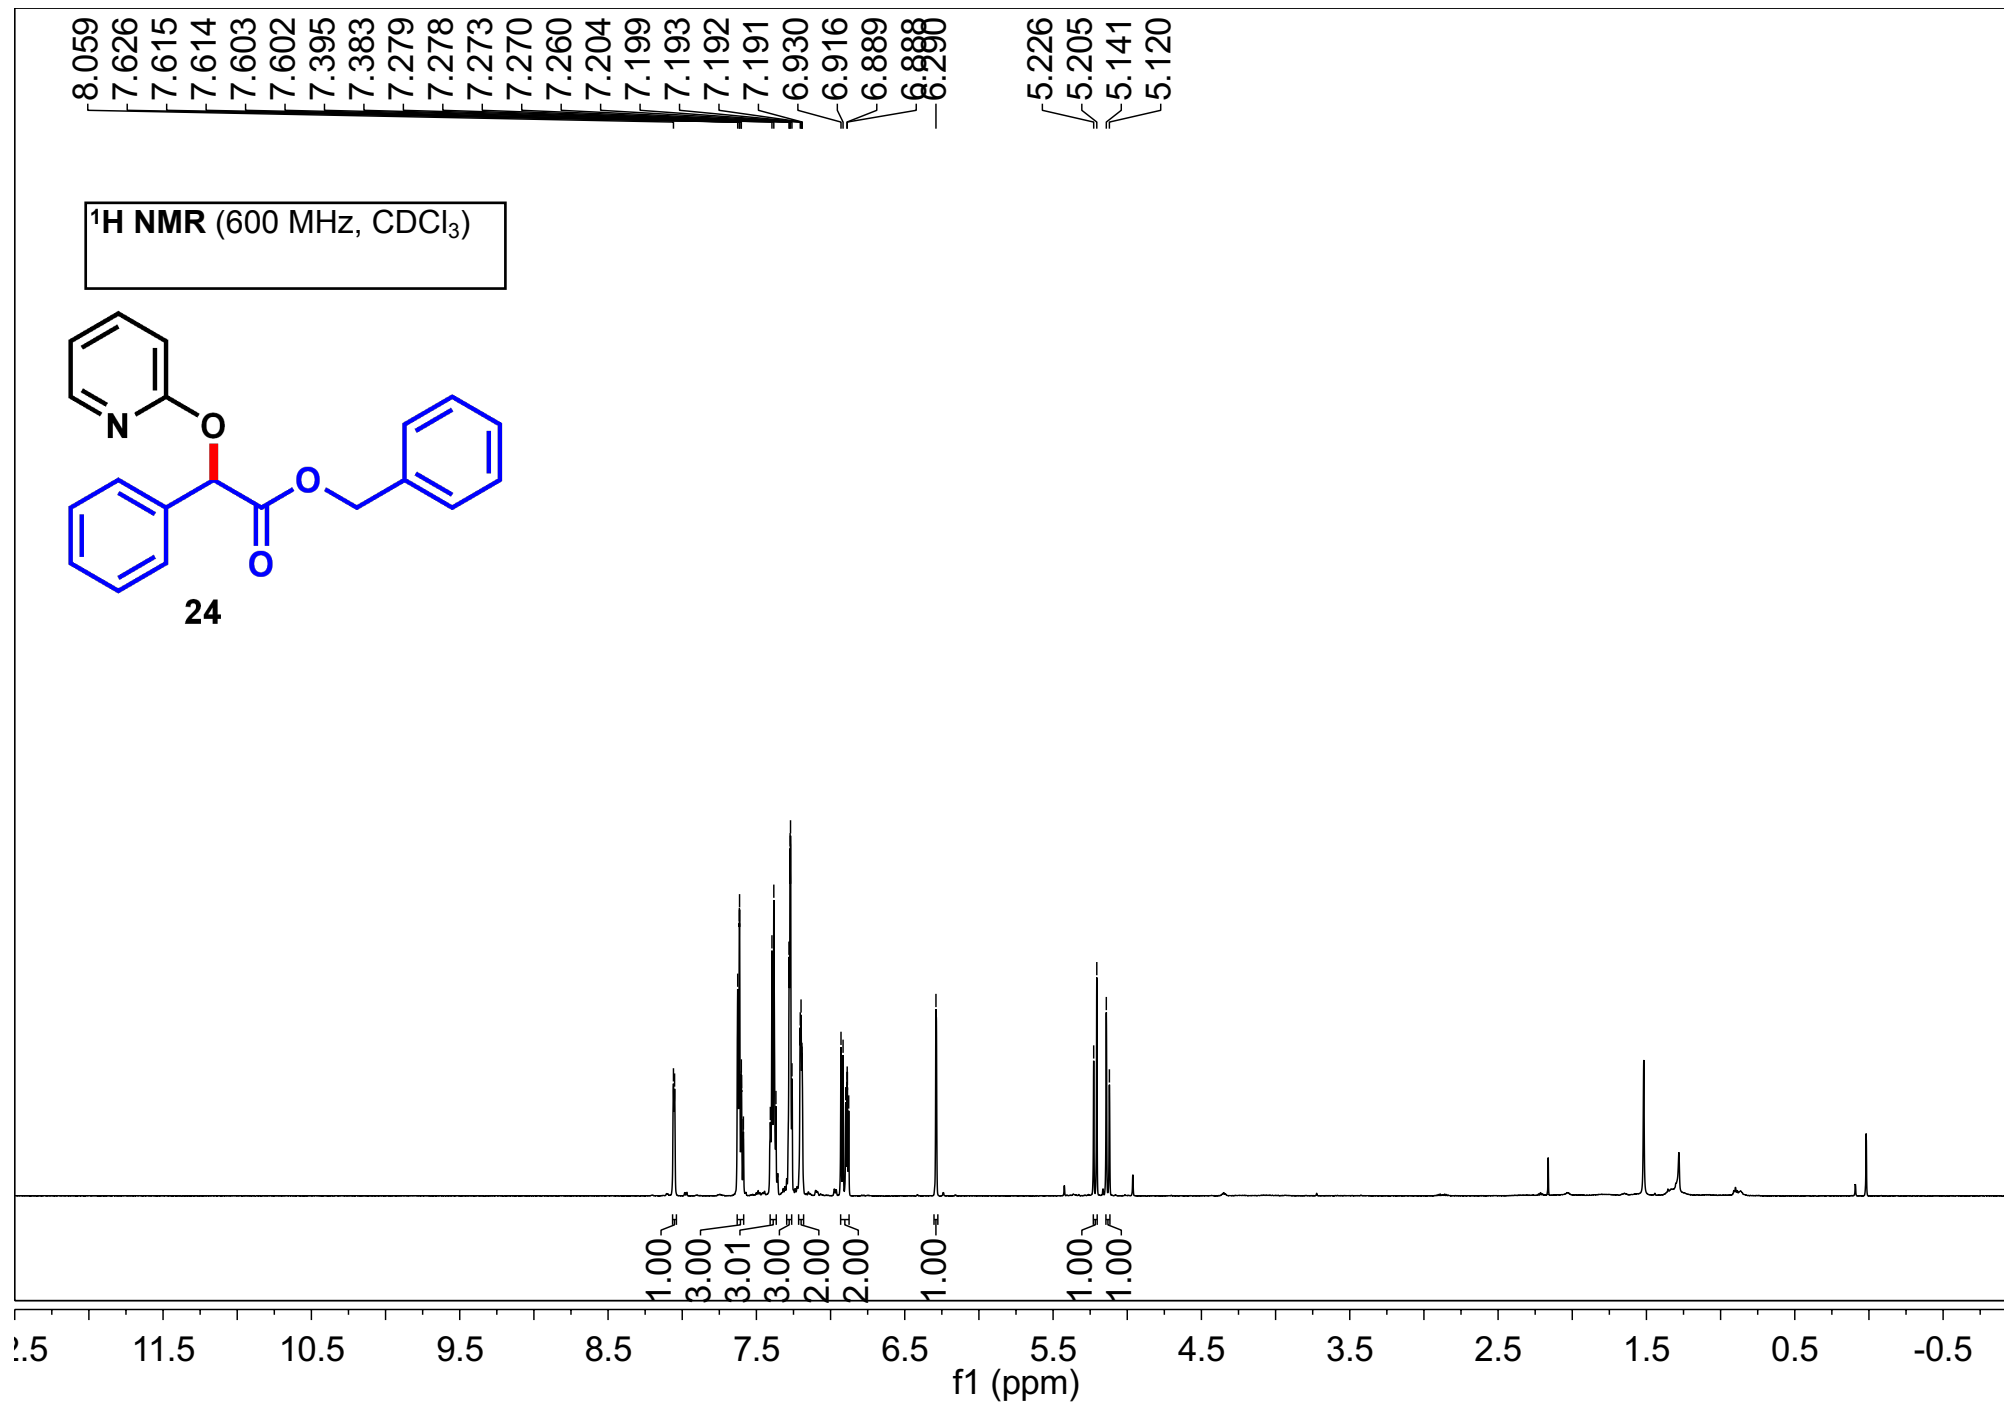

**<sup>13</sup>C NMR (150 MHz, CDCl<sub>3</sub>)**

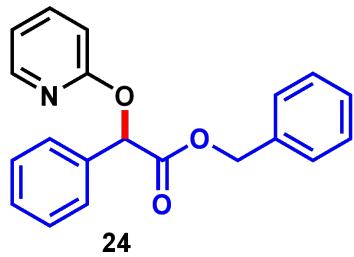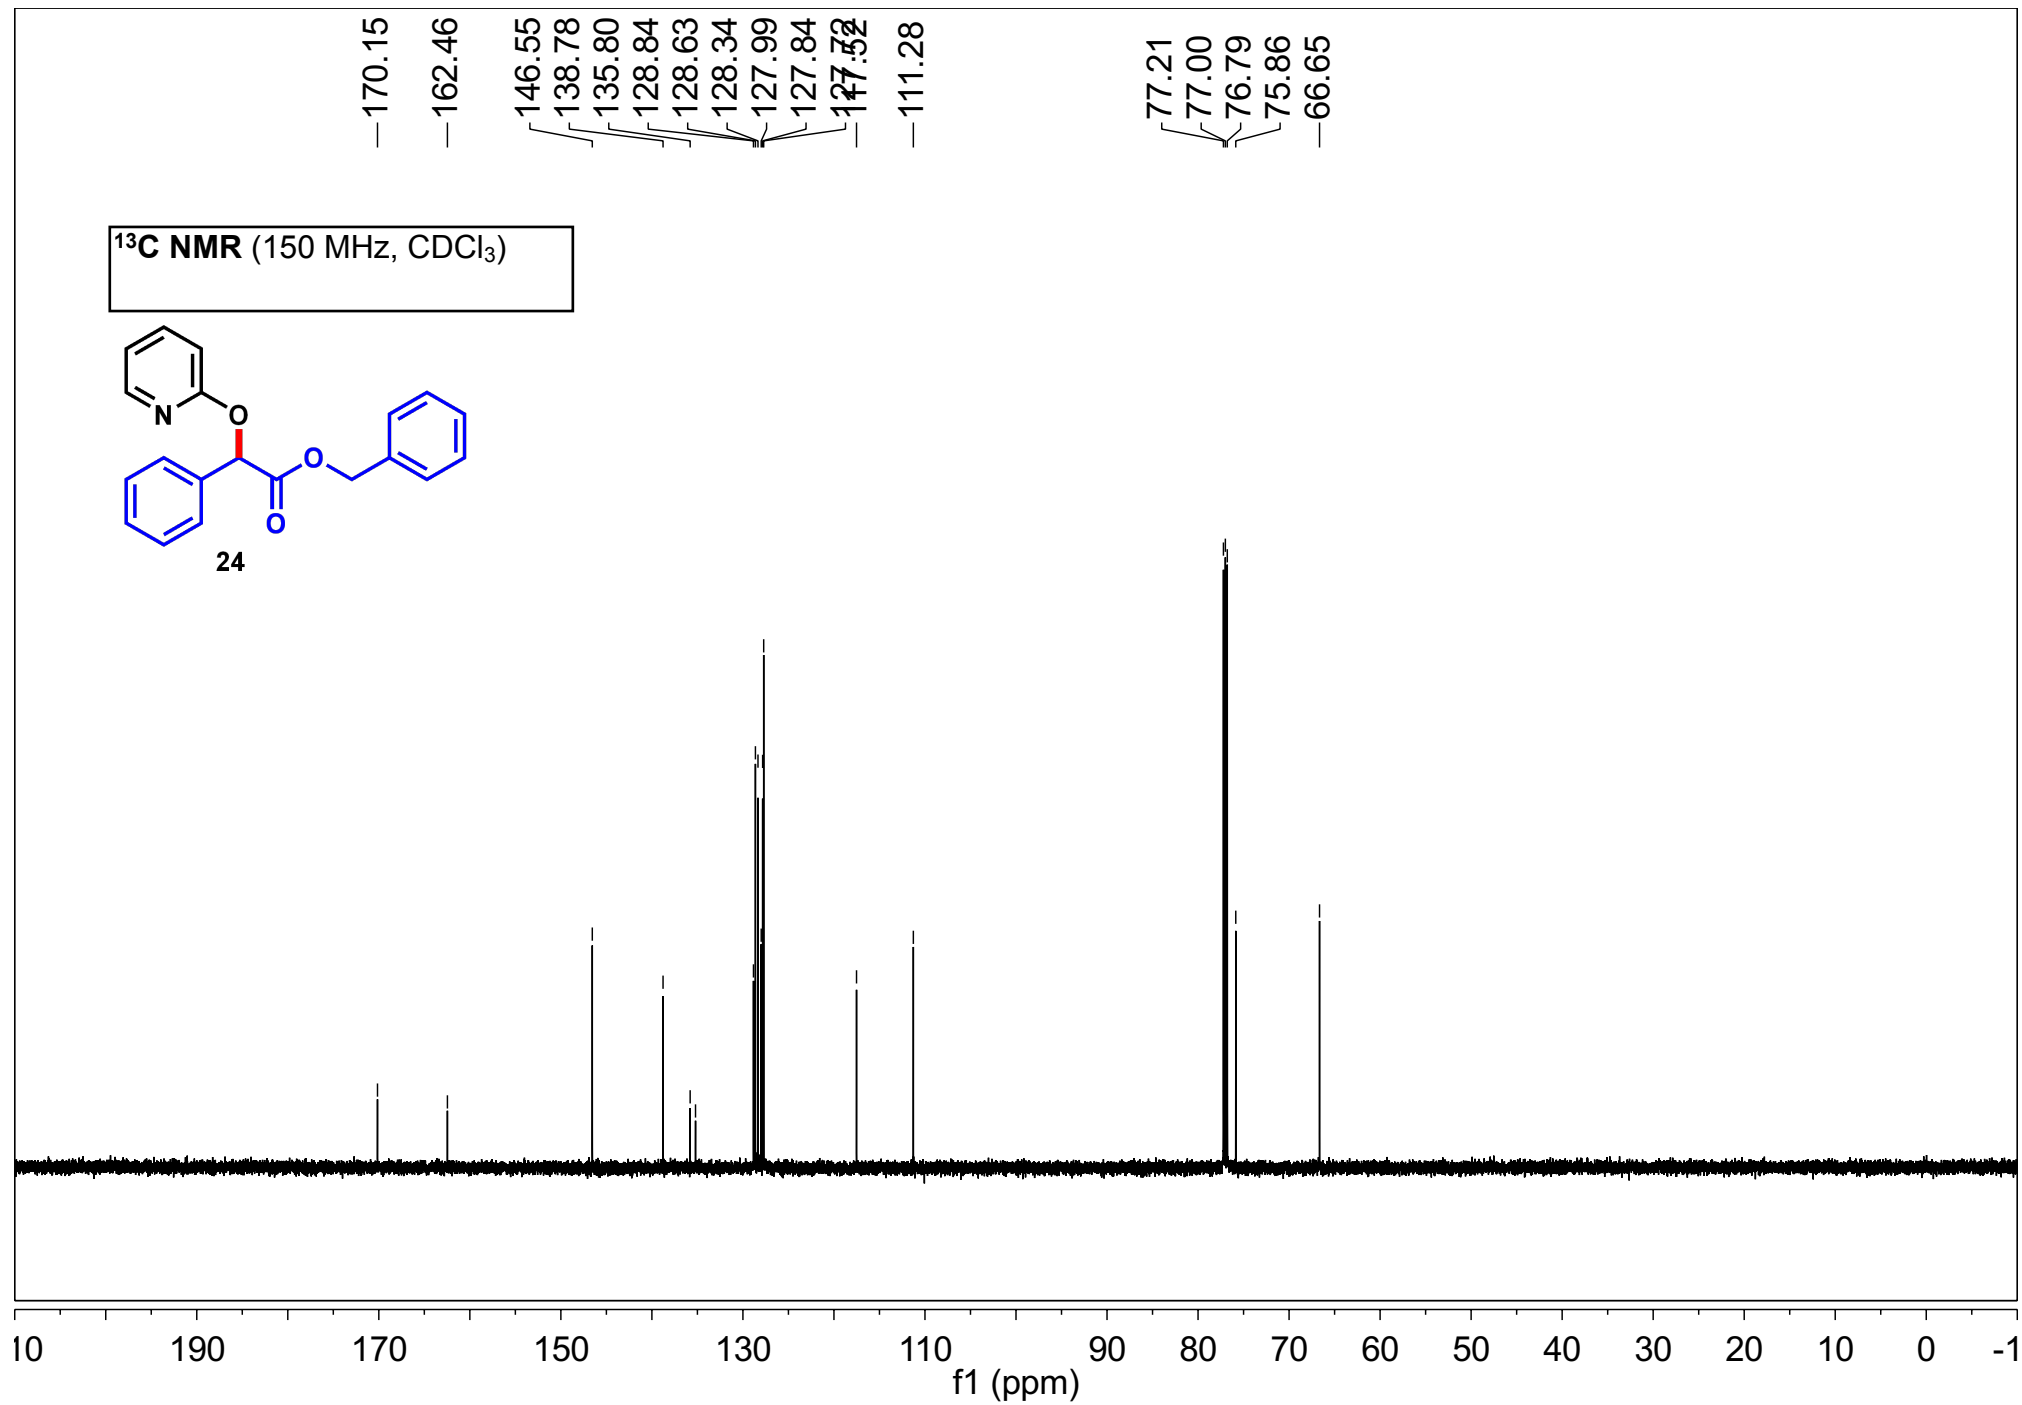

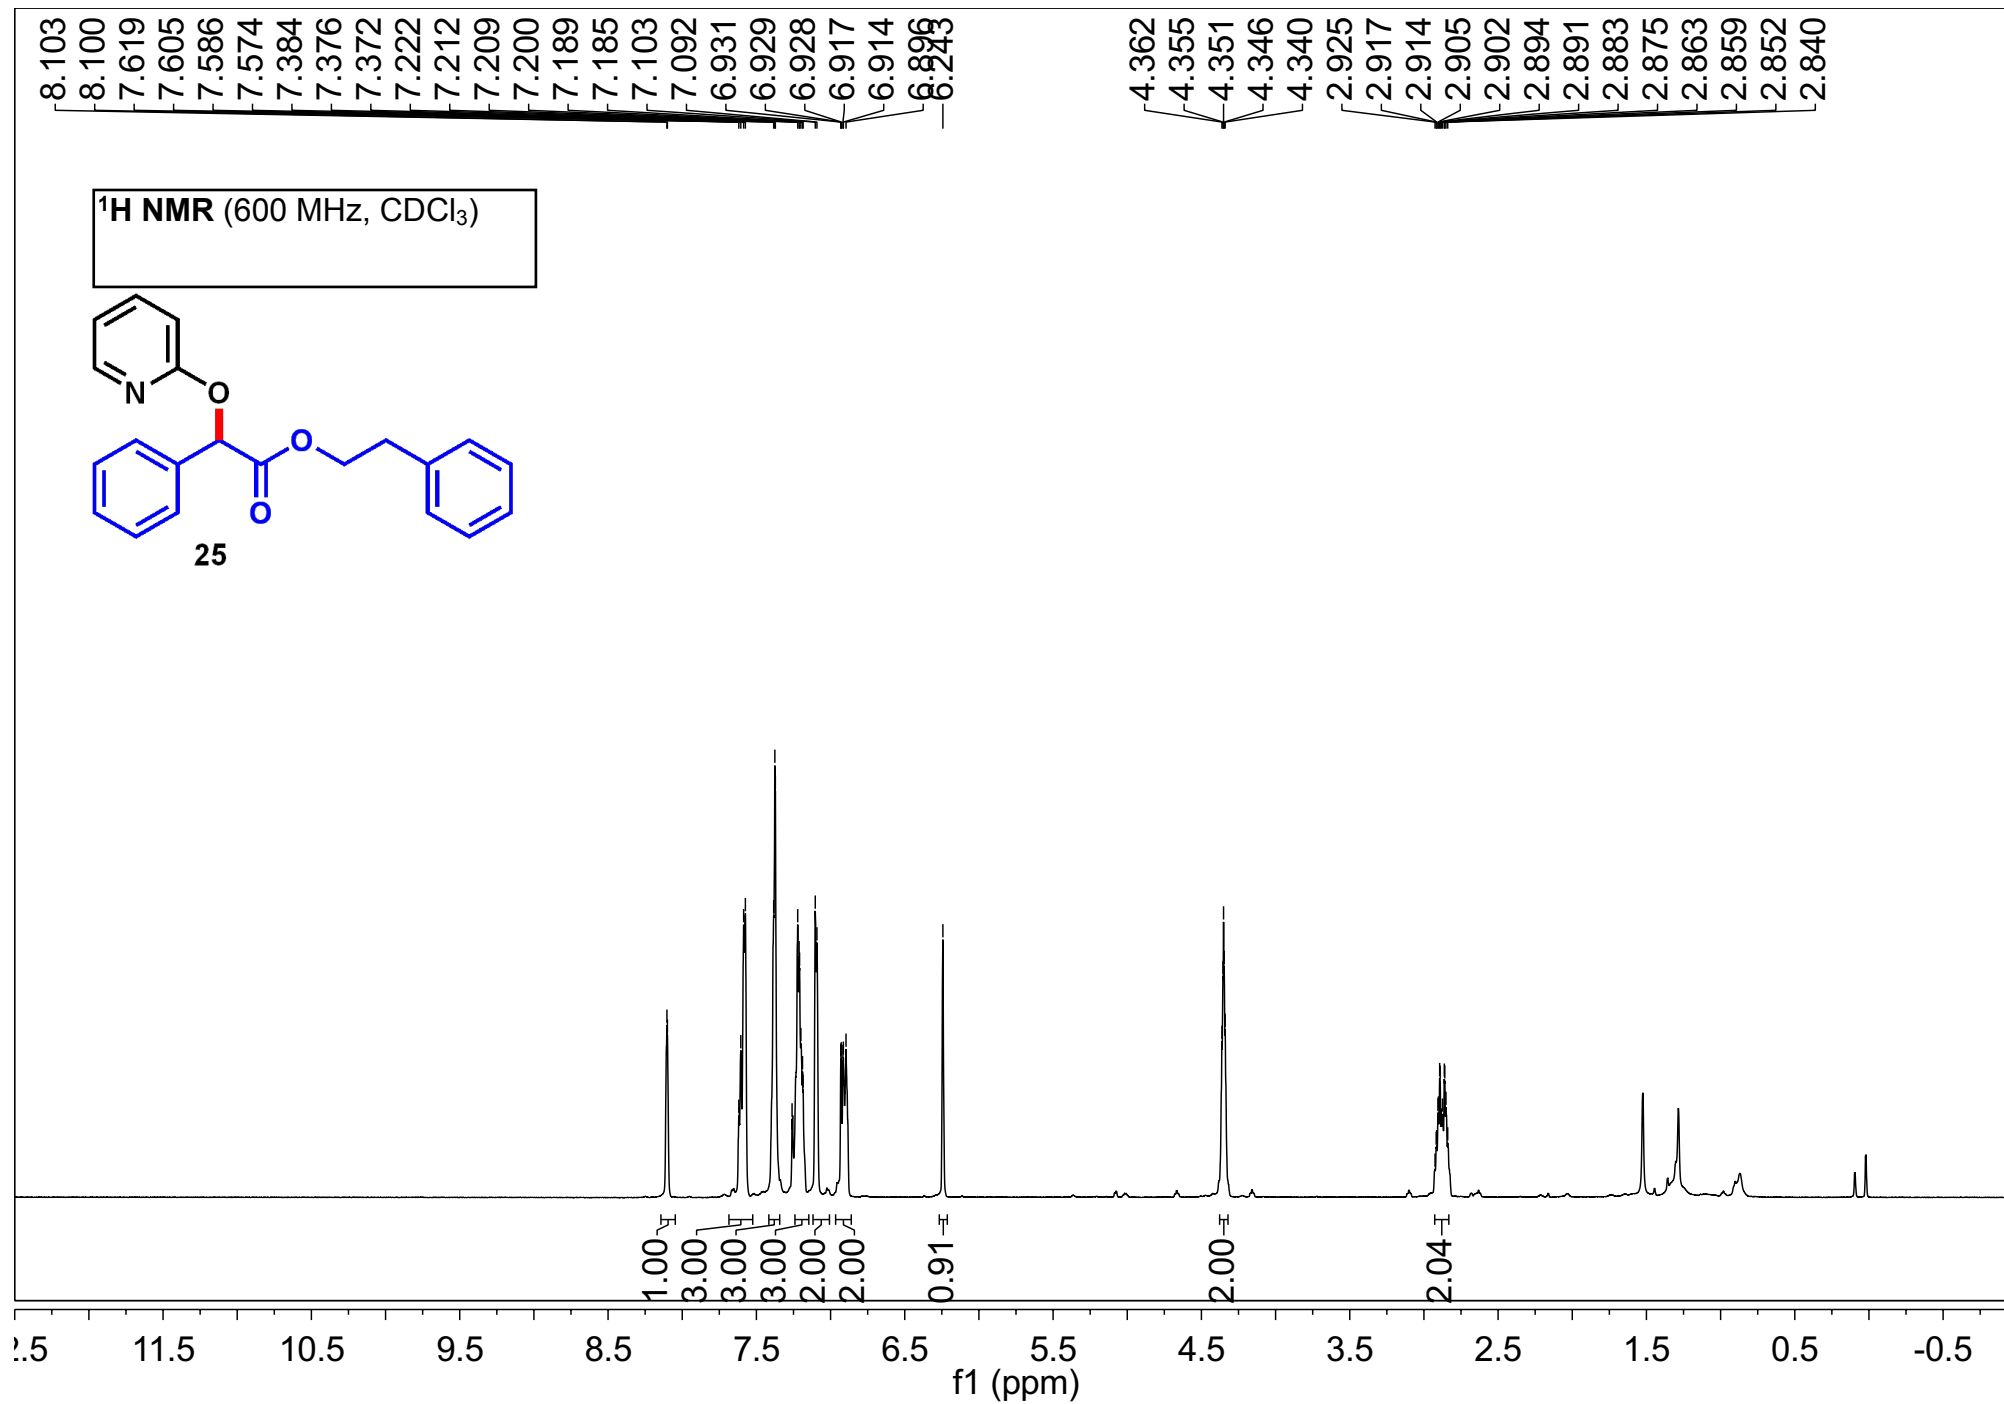

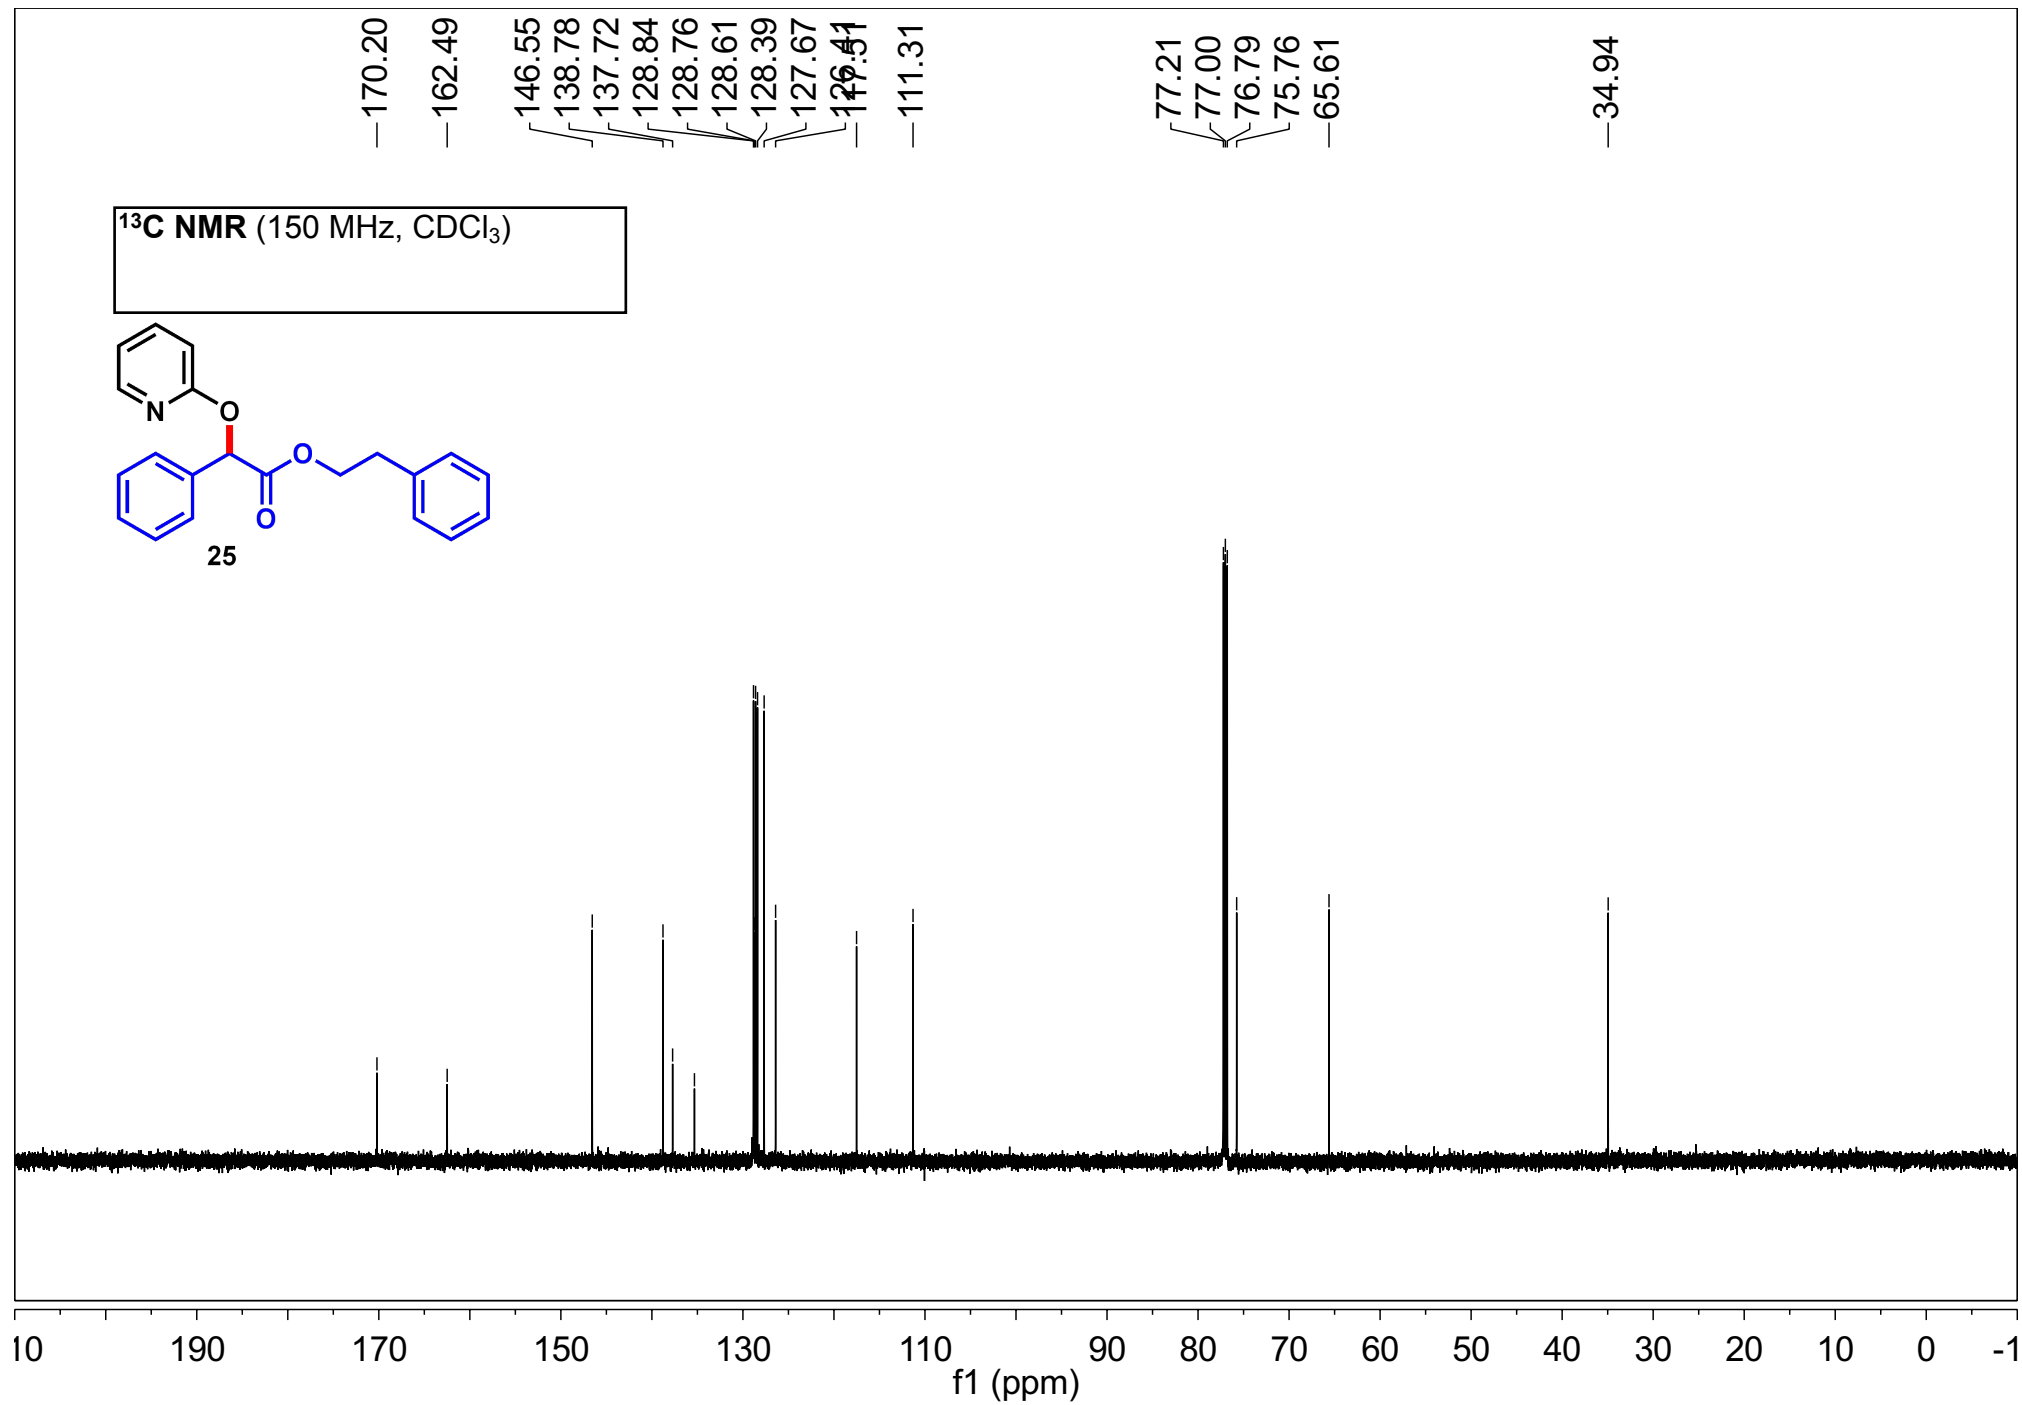

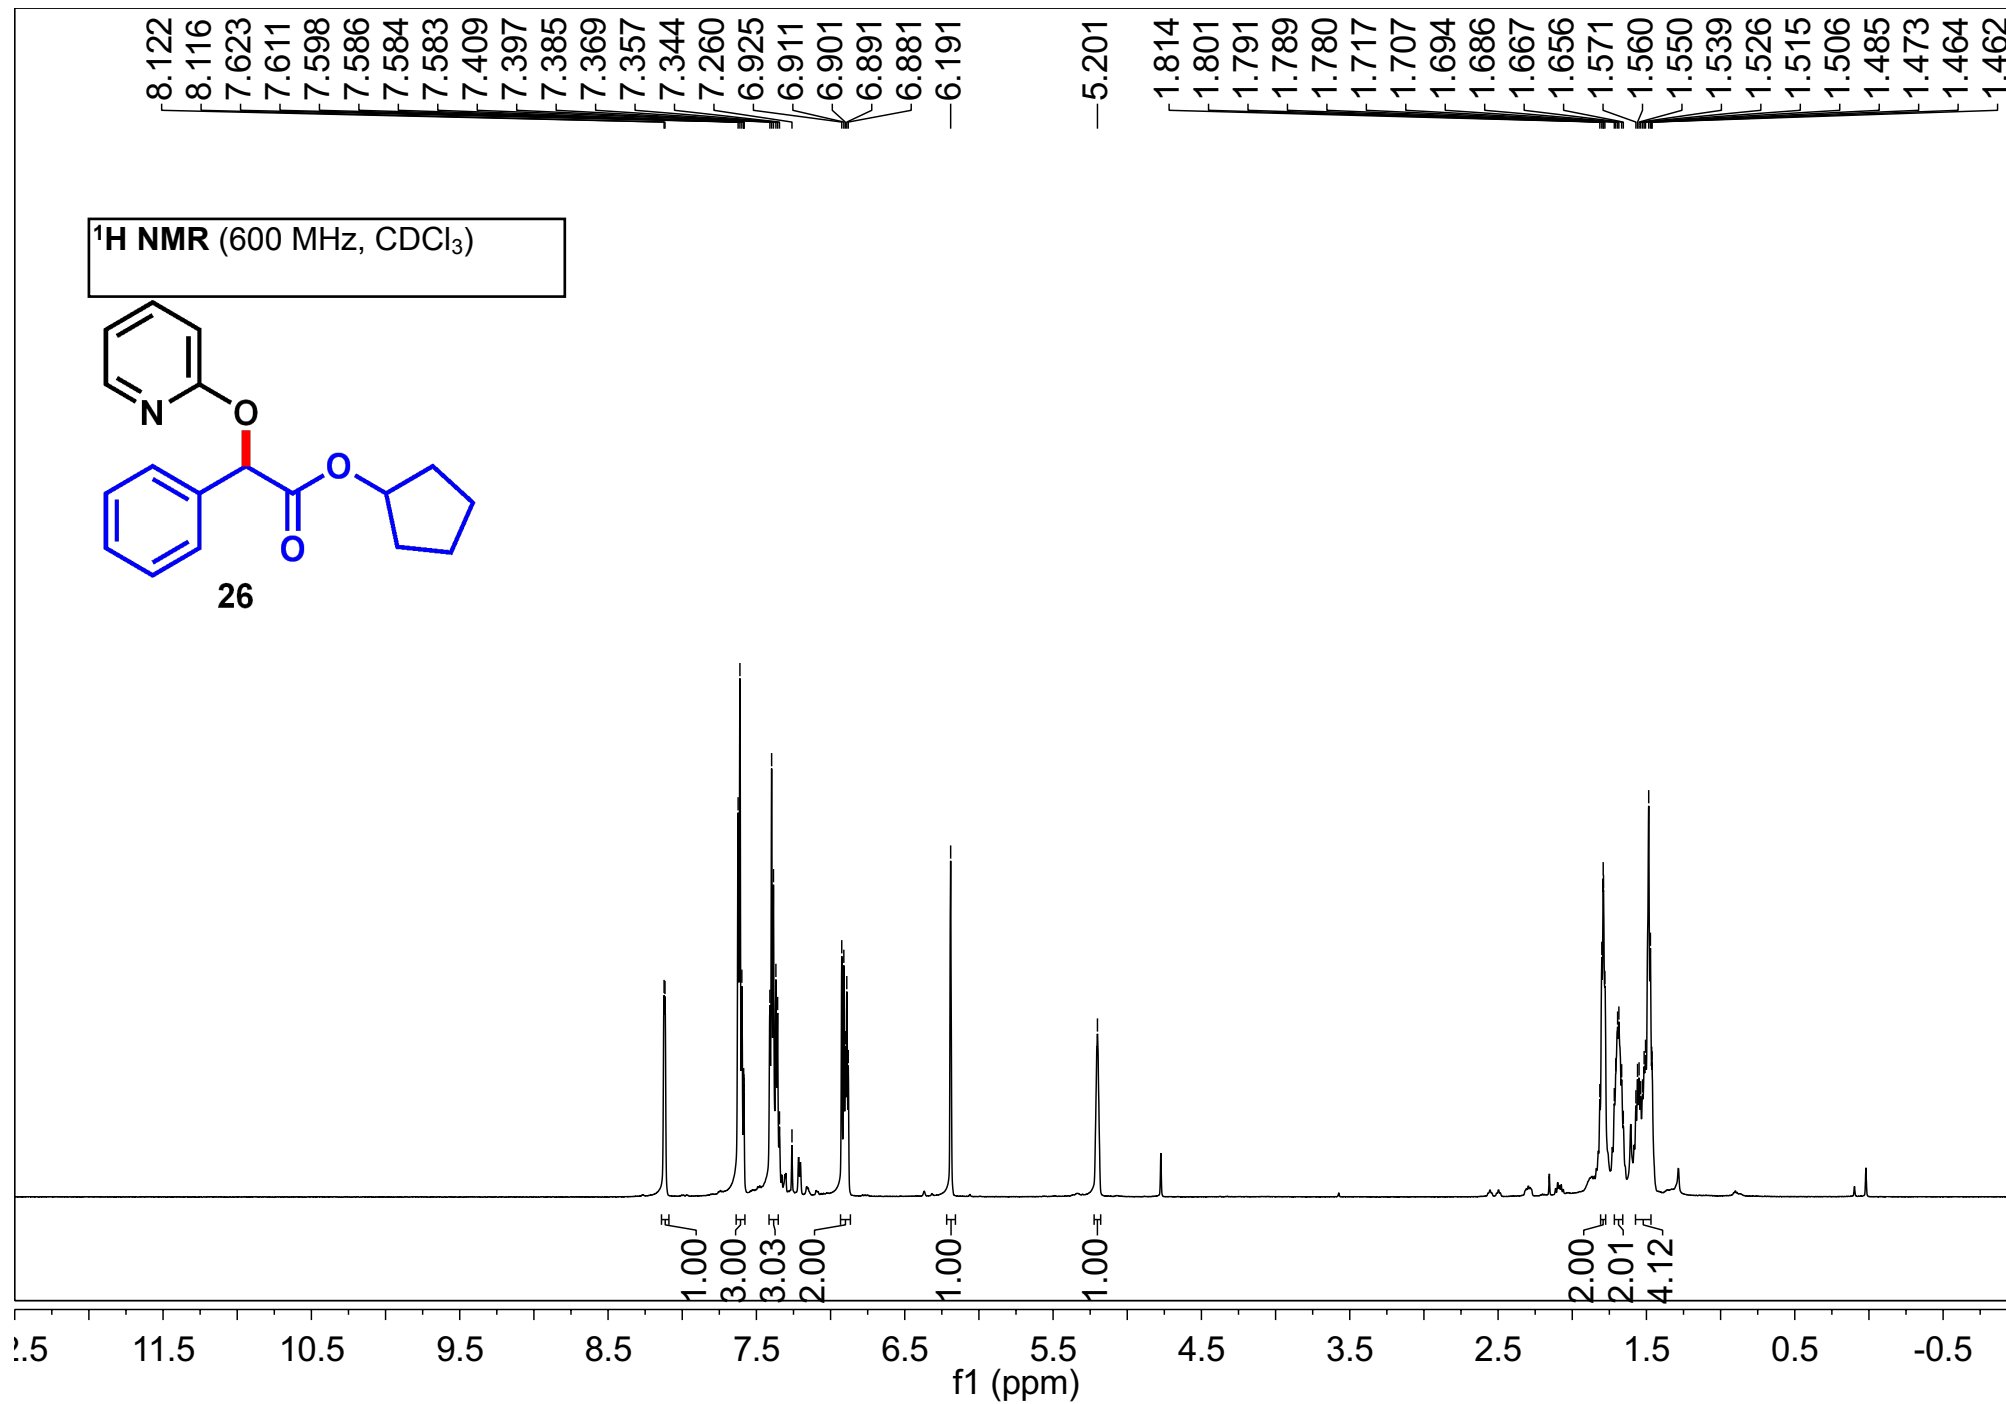



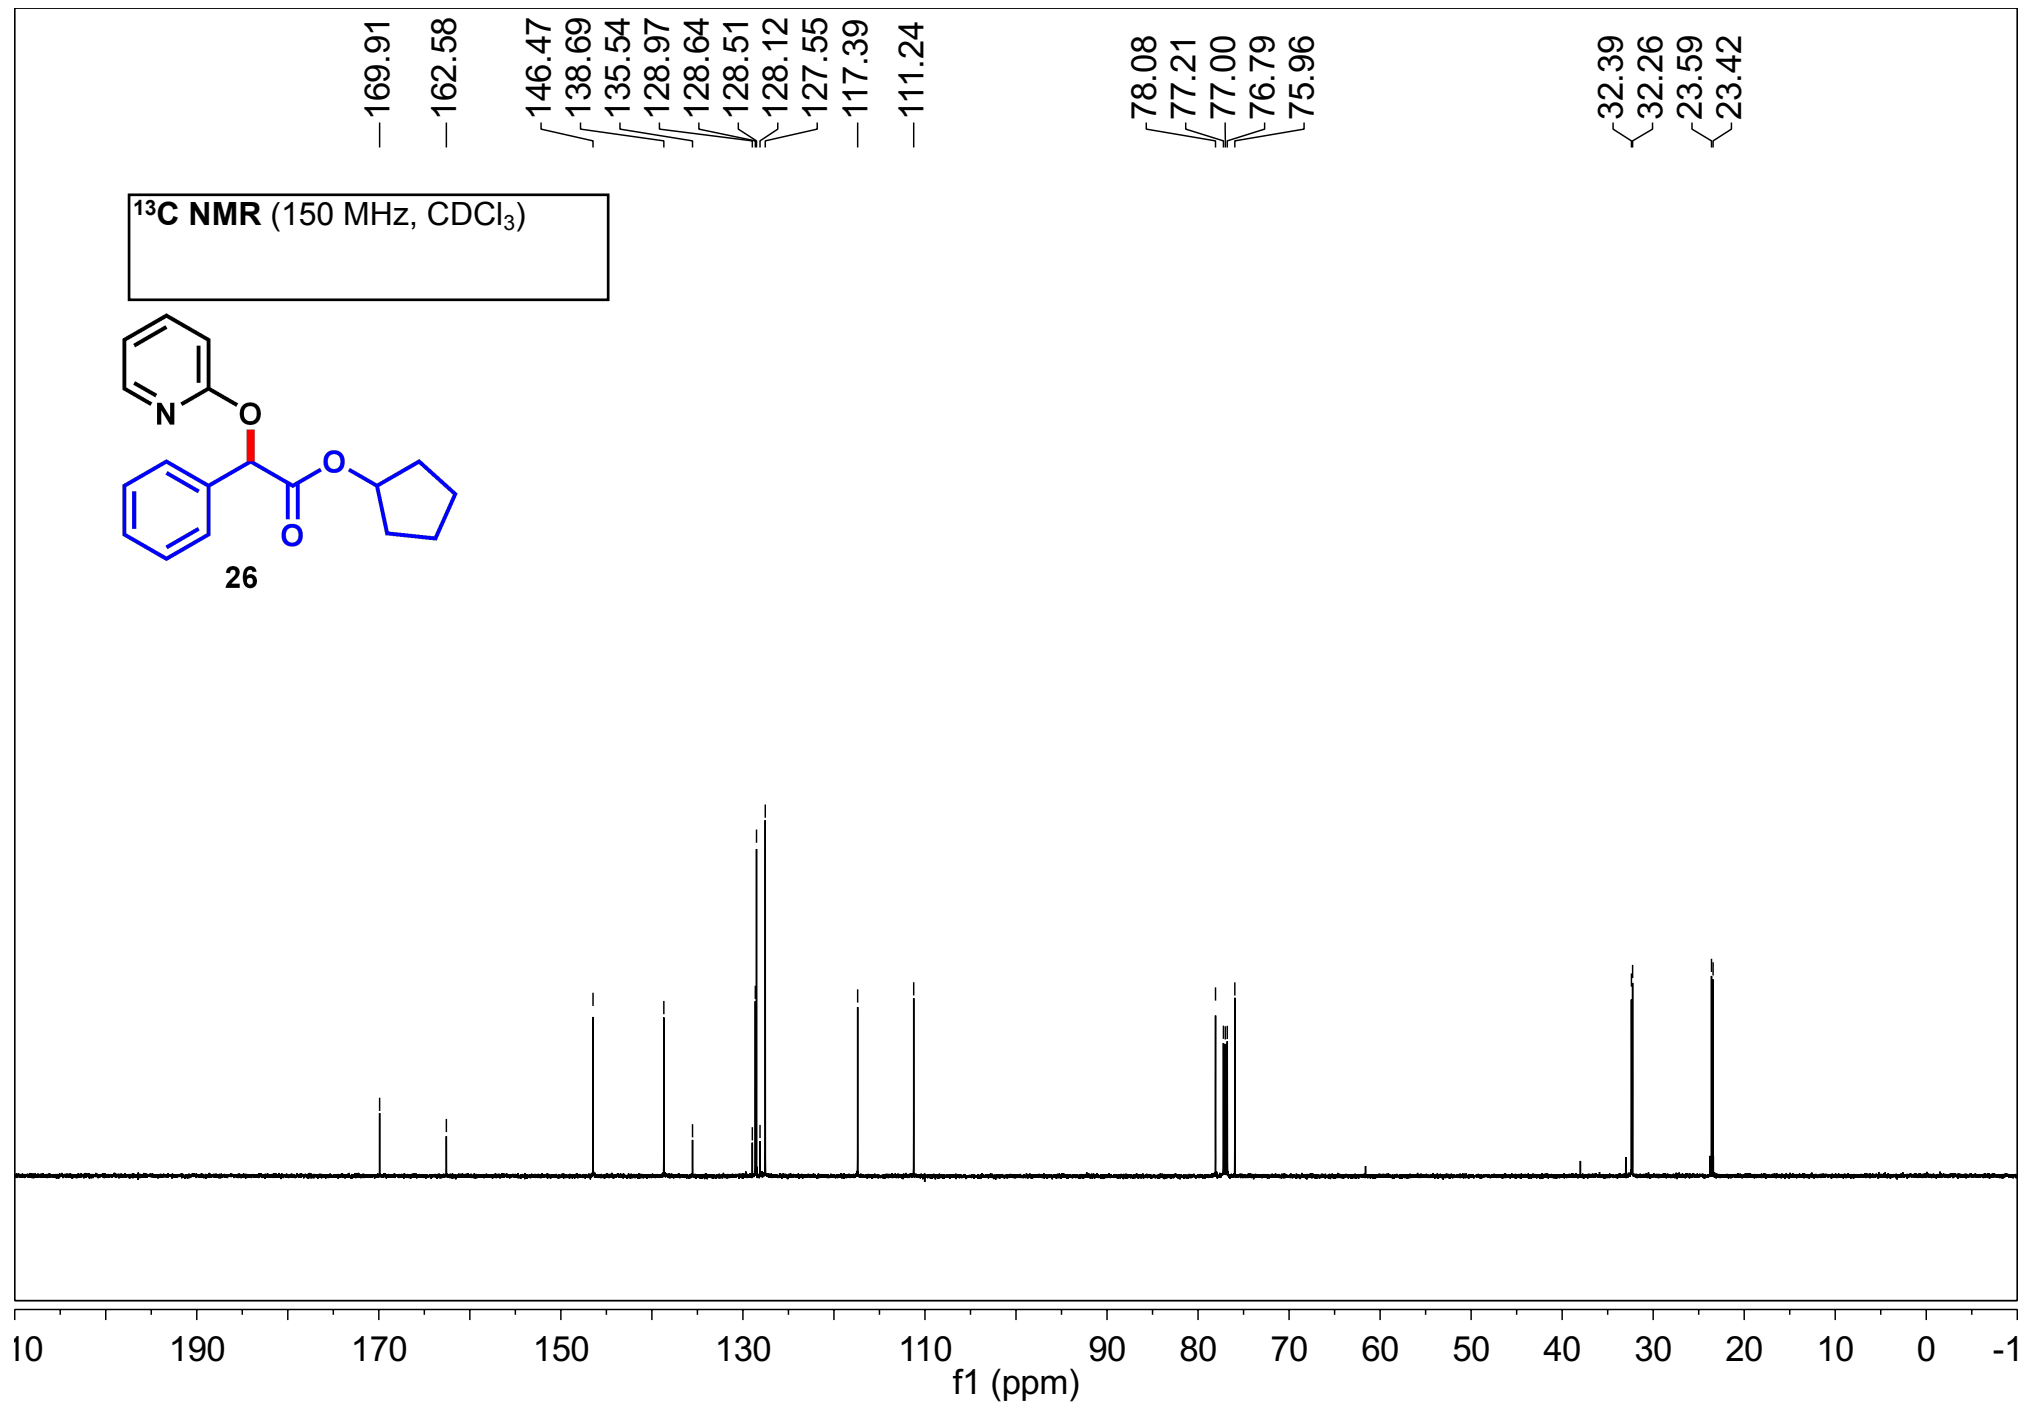

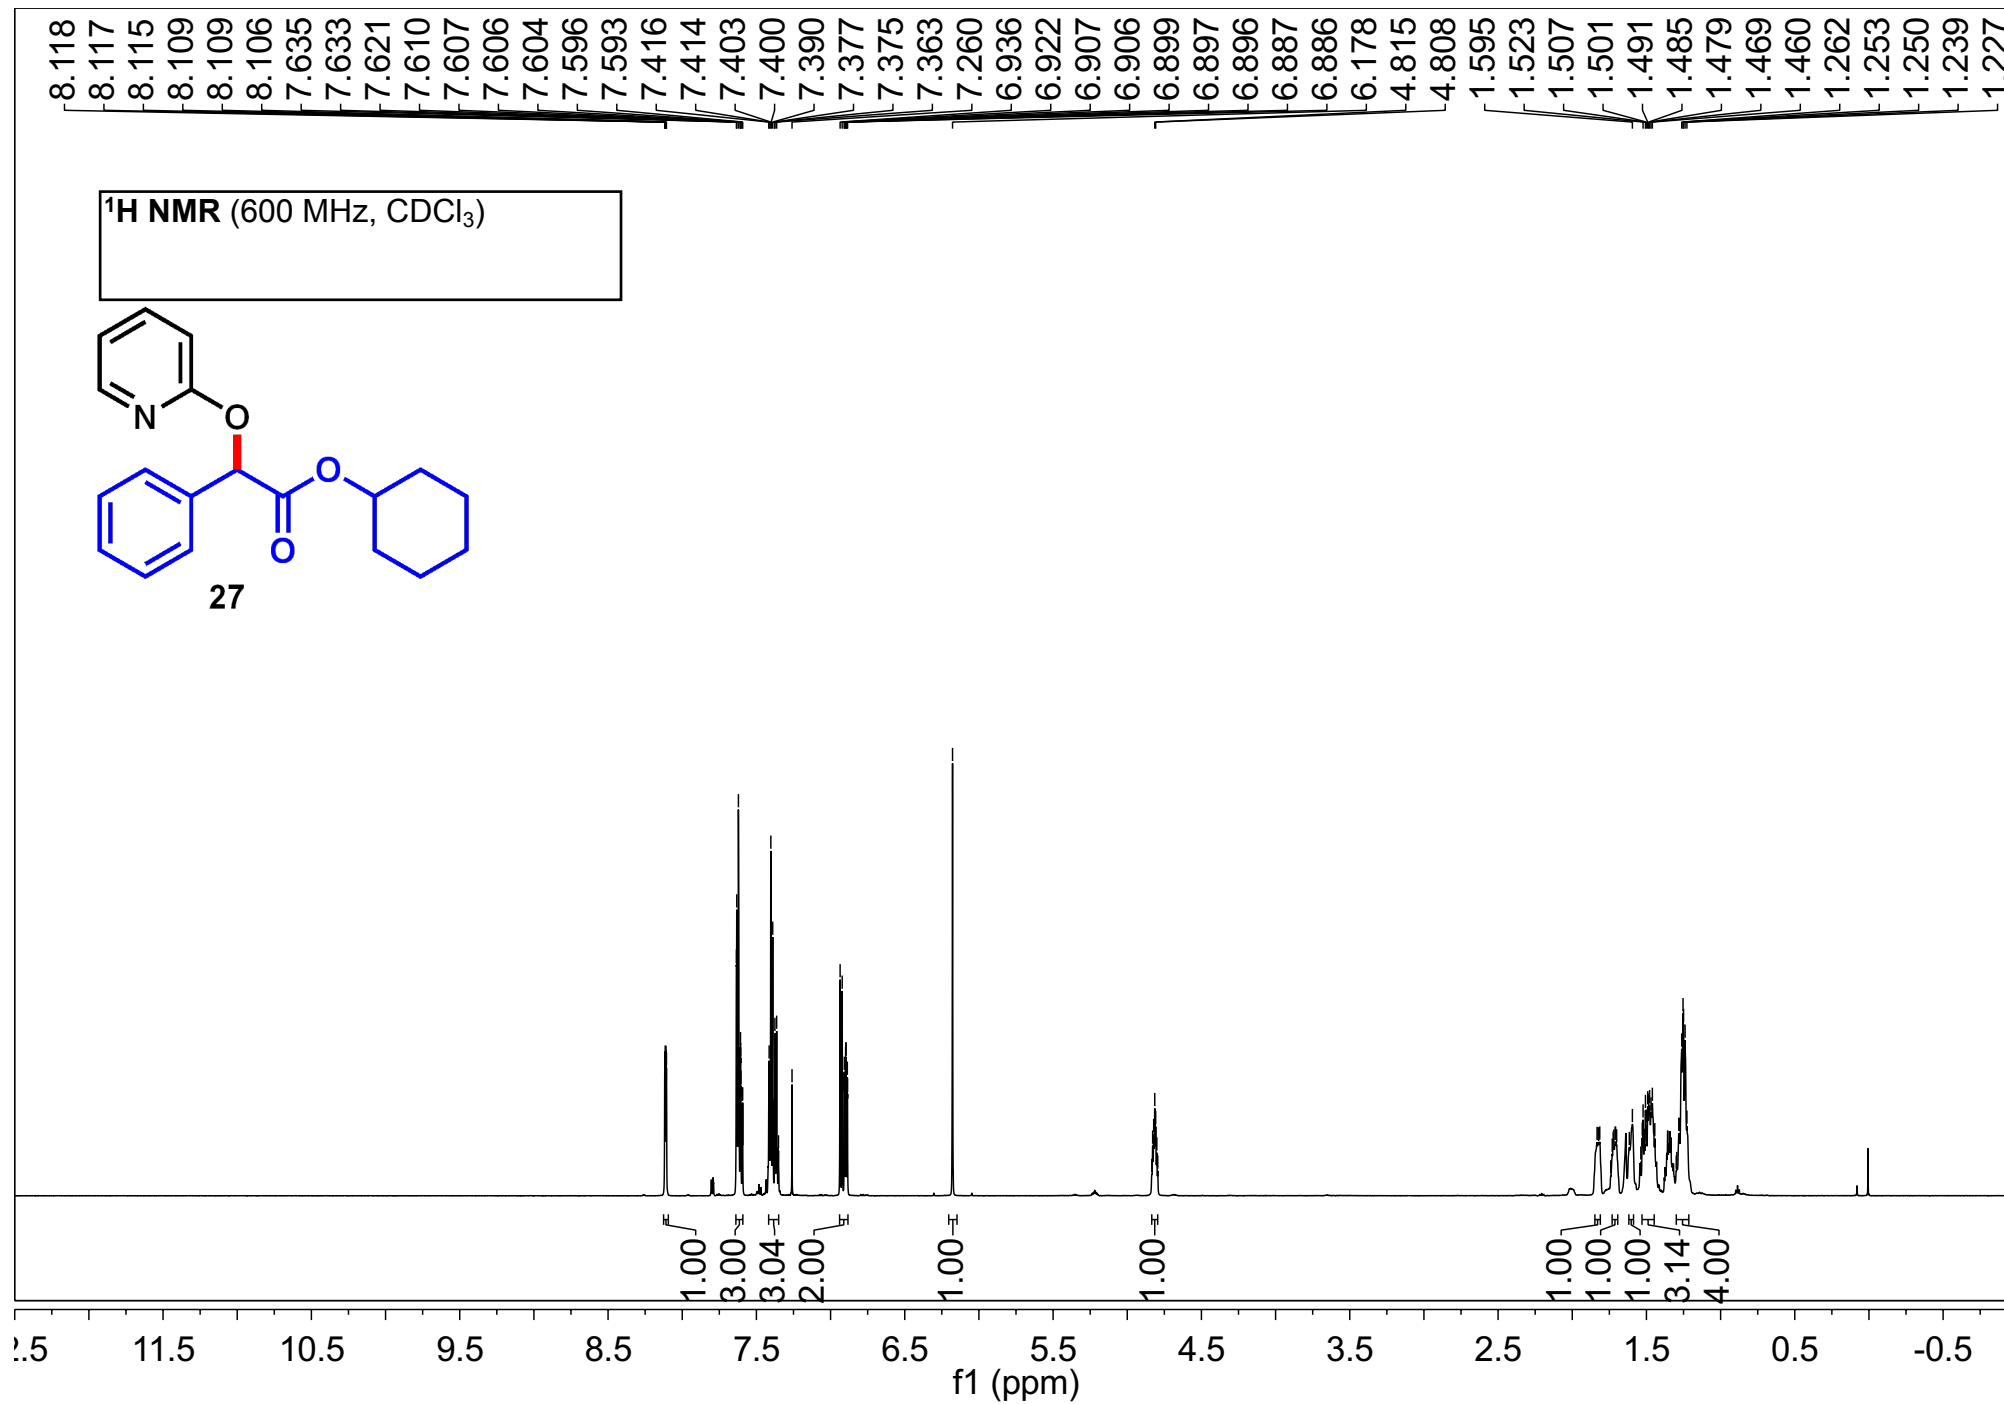

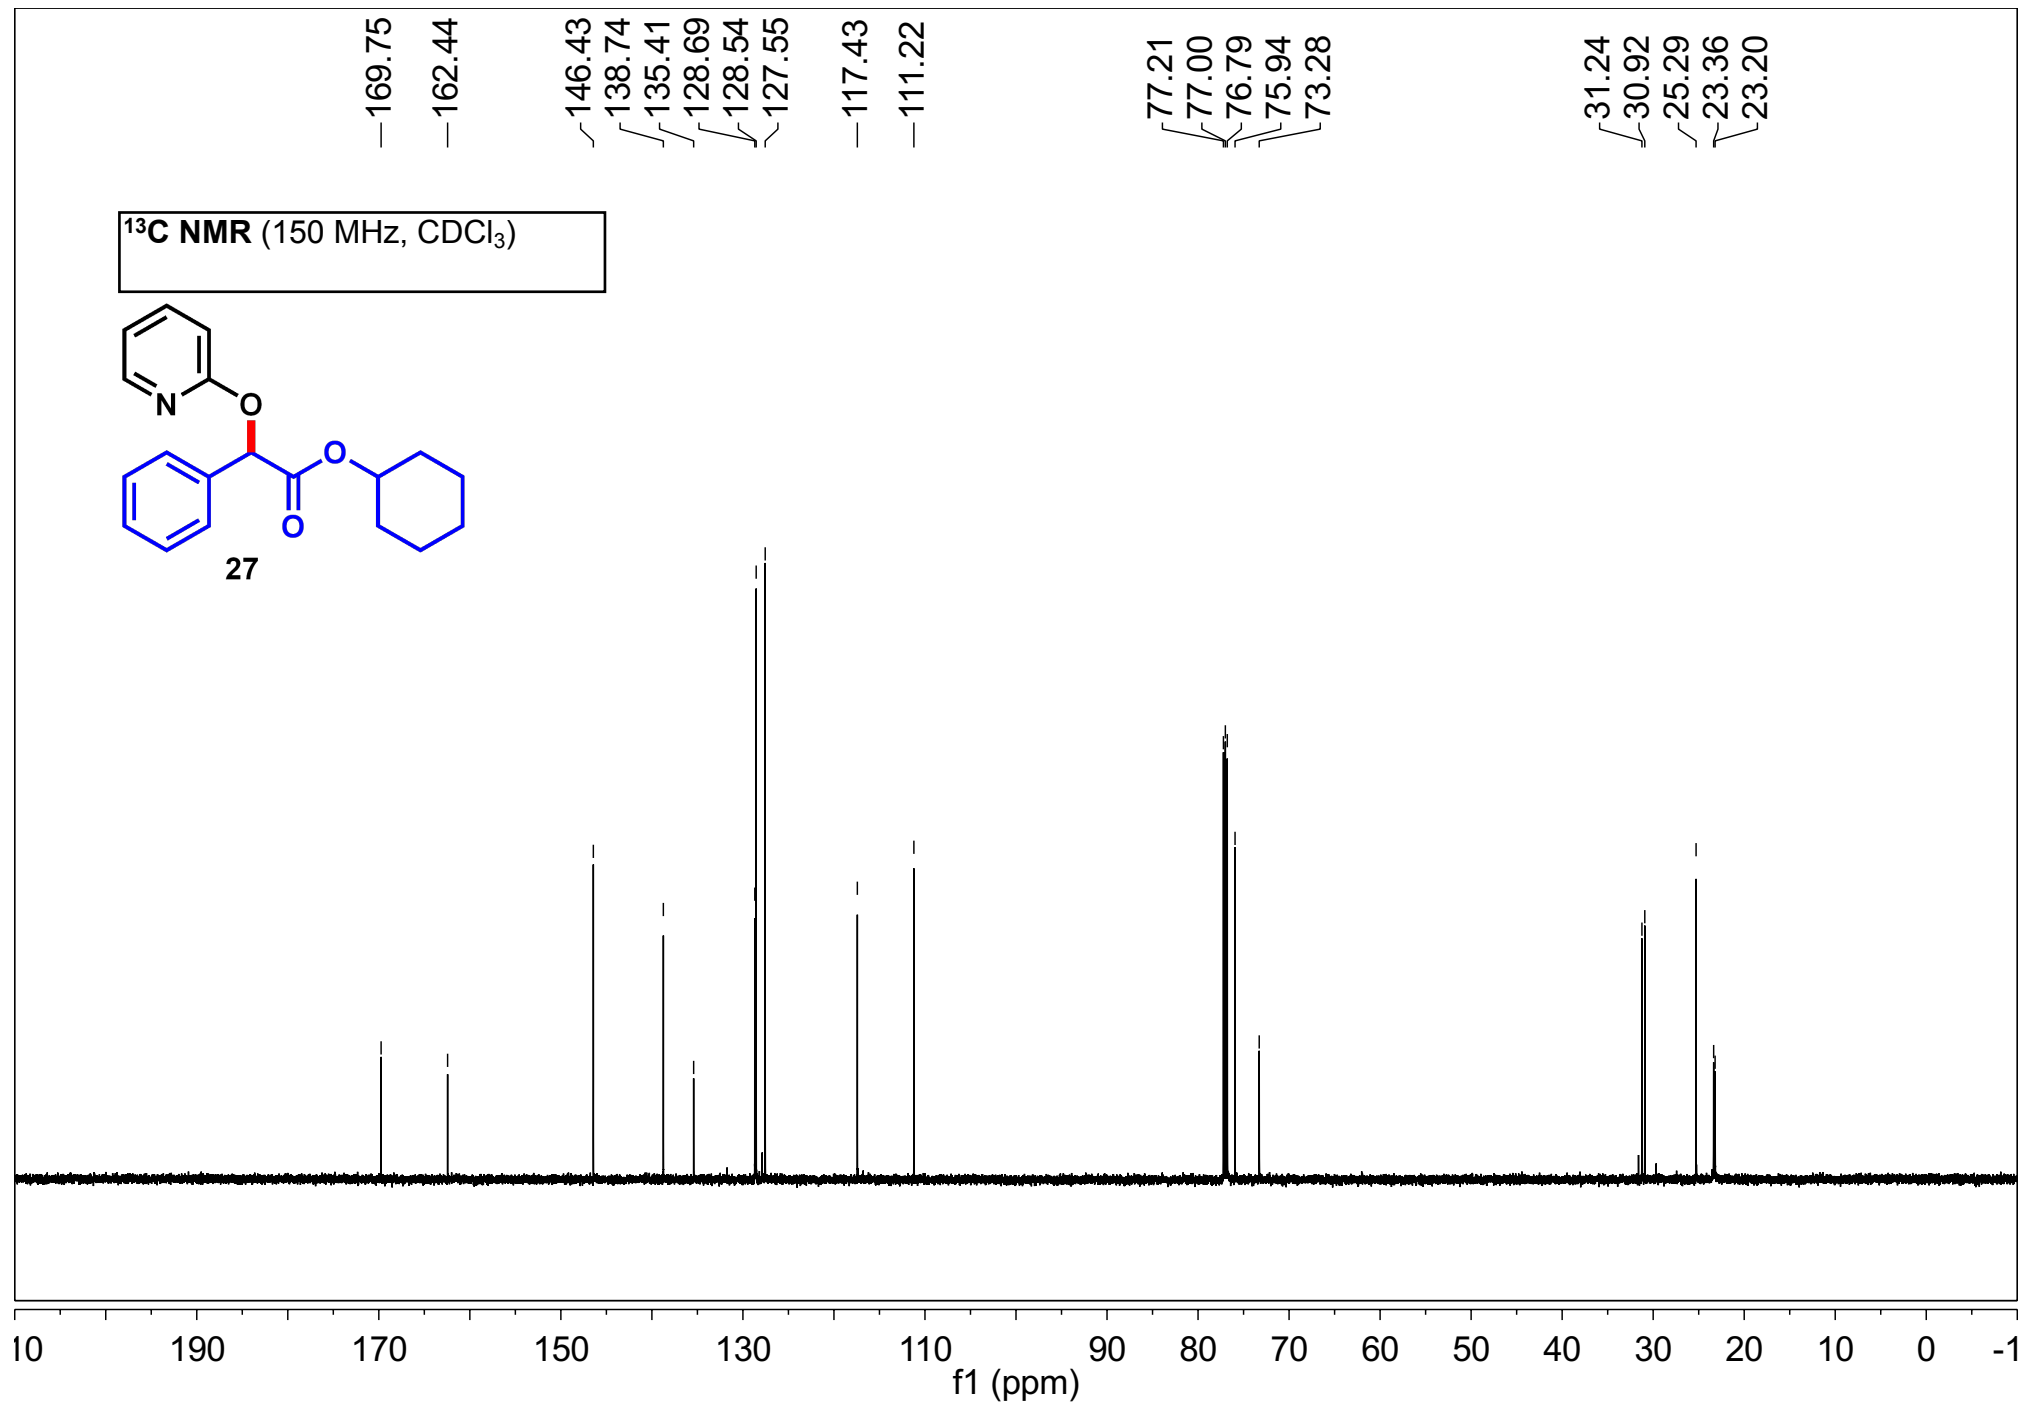

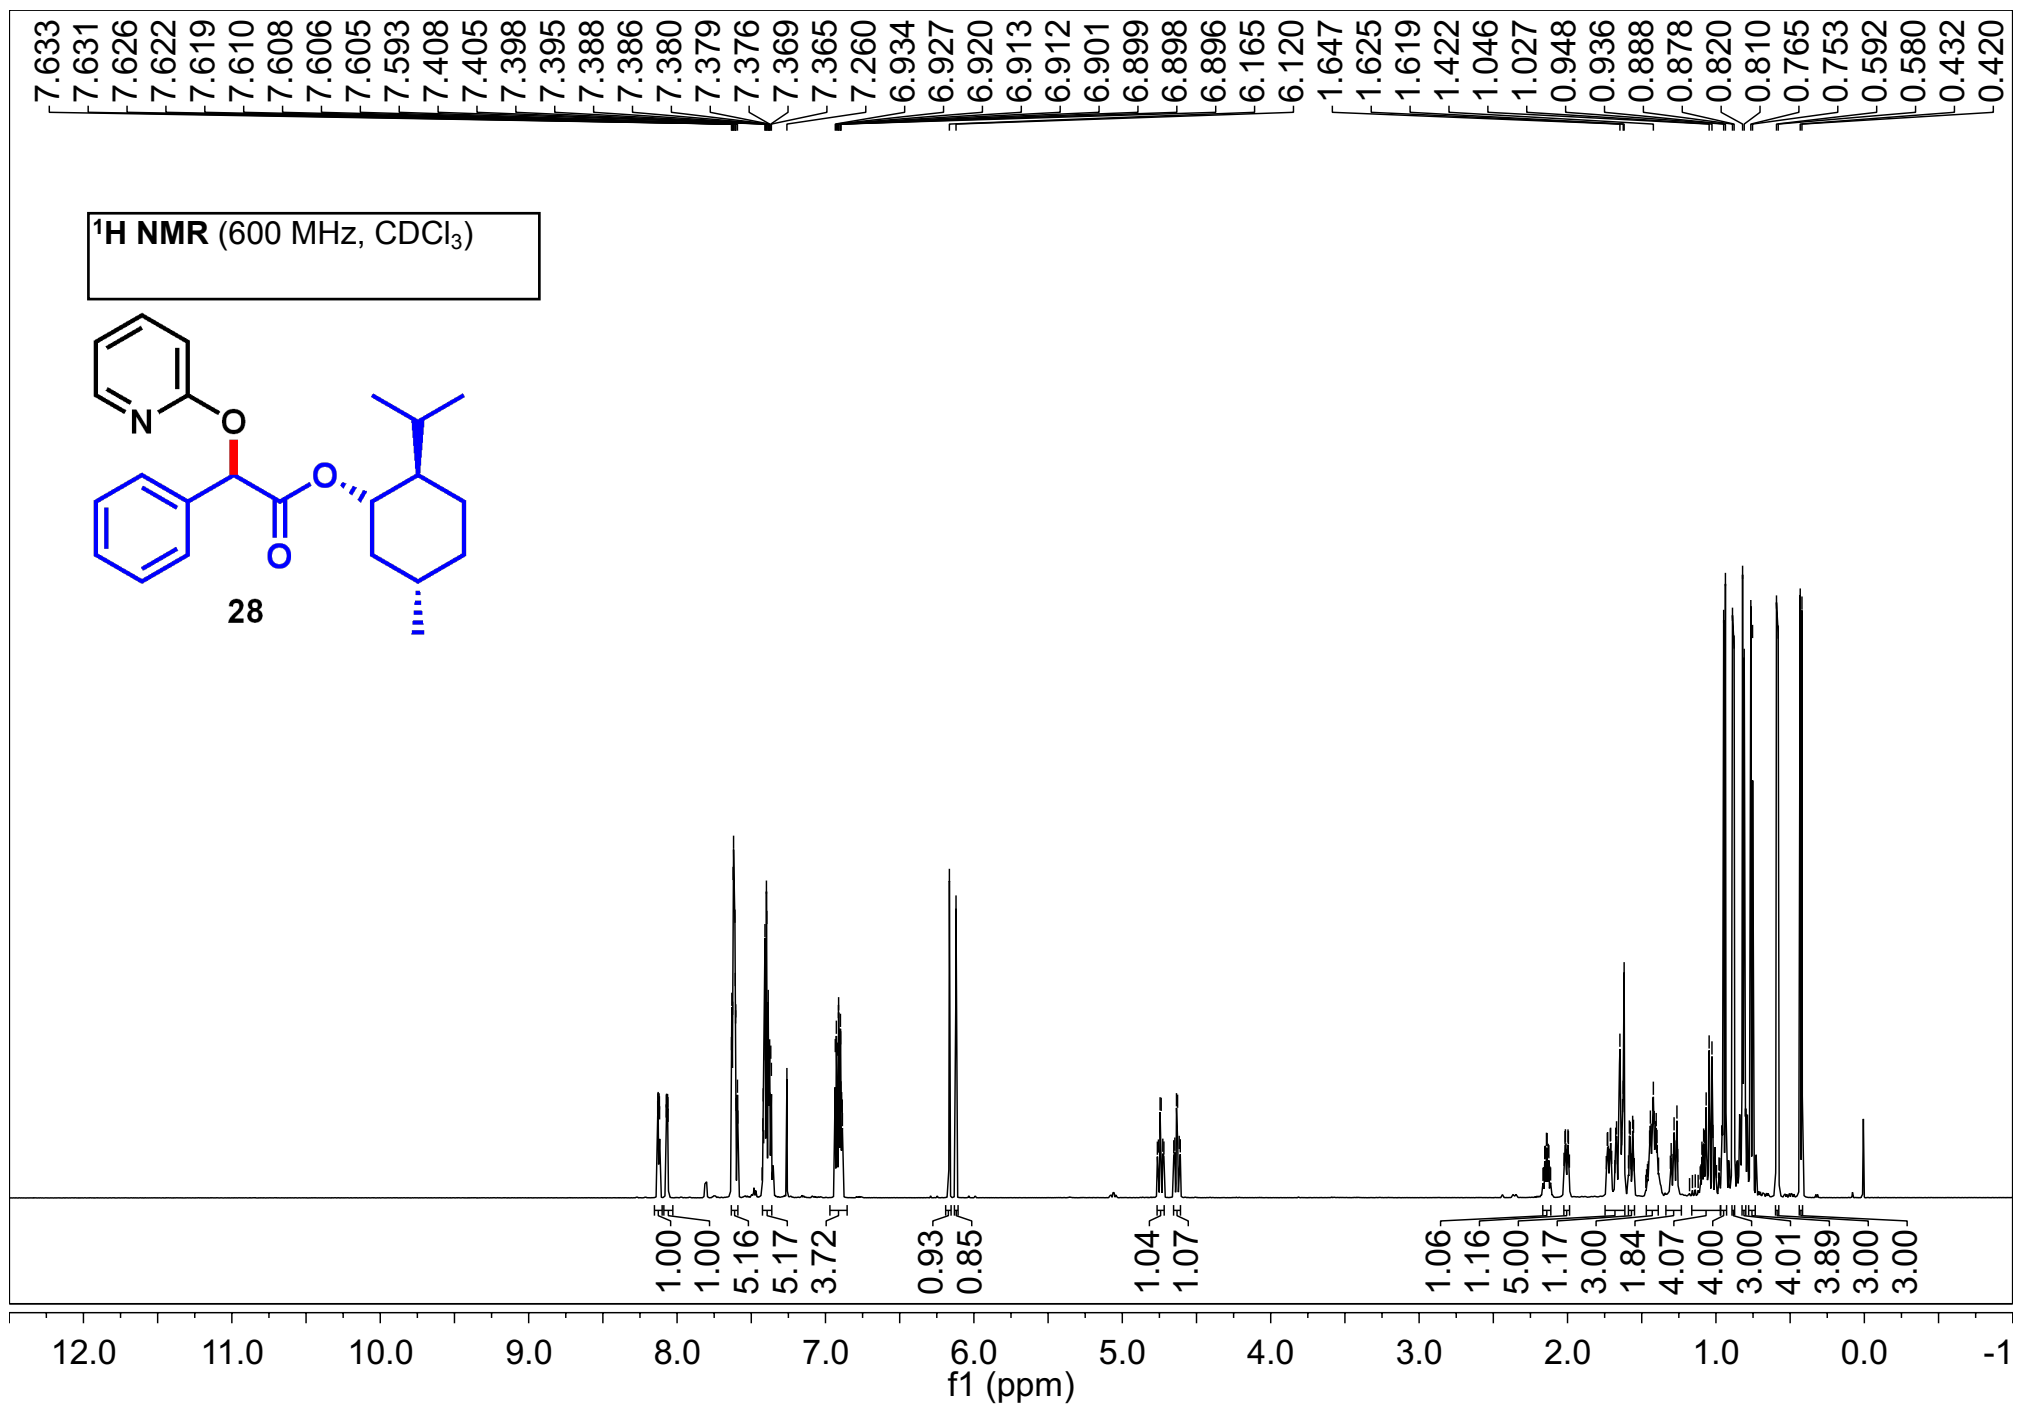

<sup>13</sup>C NMR (150 MHz, CDCl<sub>3</sub>)

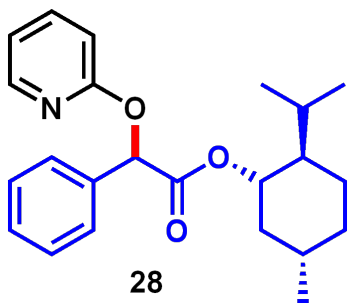

169.983  
169.854  
162.492  
162.403  
146.553  
146.291  
128.687  
128.530  
128.504  
127.722  
127.514  
127.424  
117.389  
111.253  
111.168

77.213  
77.001  
76.789  
76.129  
75.952  
75.264  
74.882

47.125  
46.900  
40.426  
40.156  
34.195  
34.176  
31.351  
31.279  
26.005  
25.278  
22.971  
21.974  
21.912  
20.769  
20.554  
16.258  
15.630

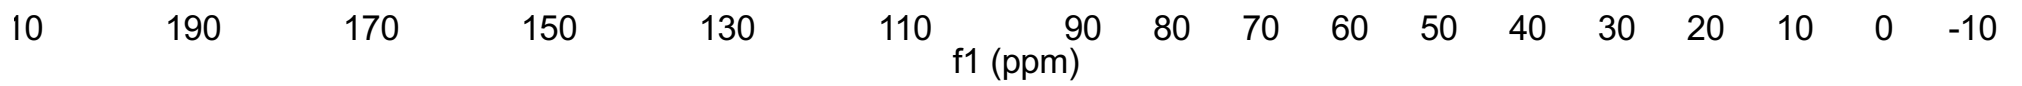

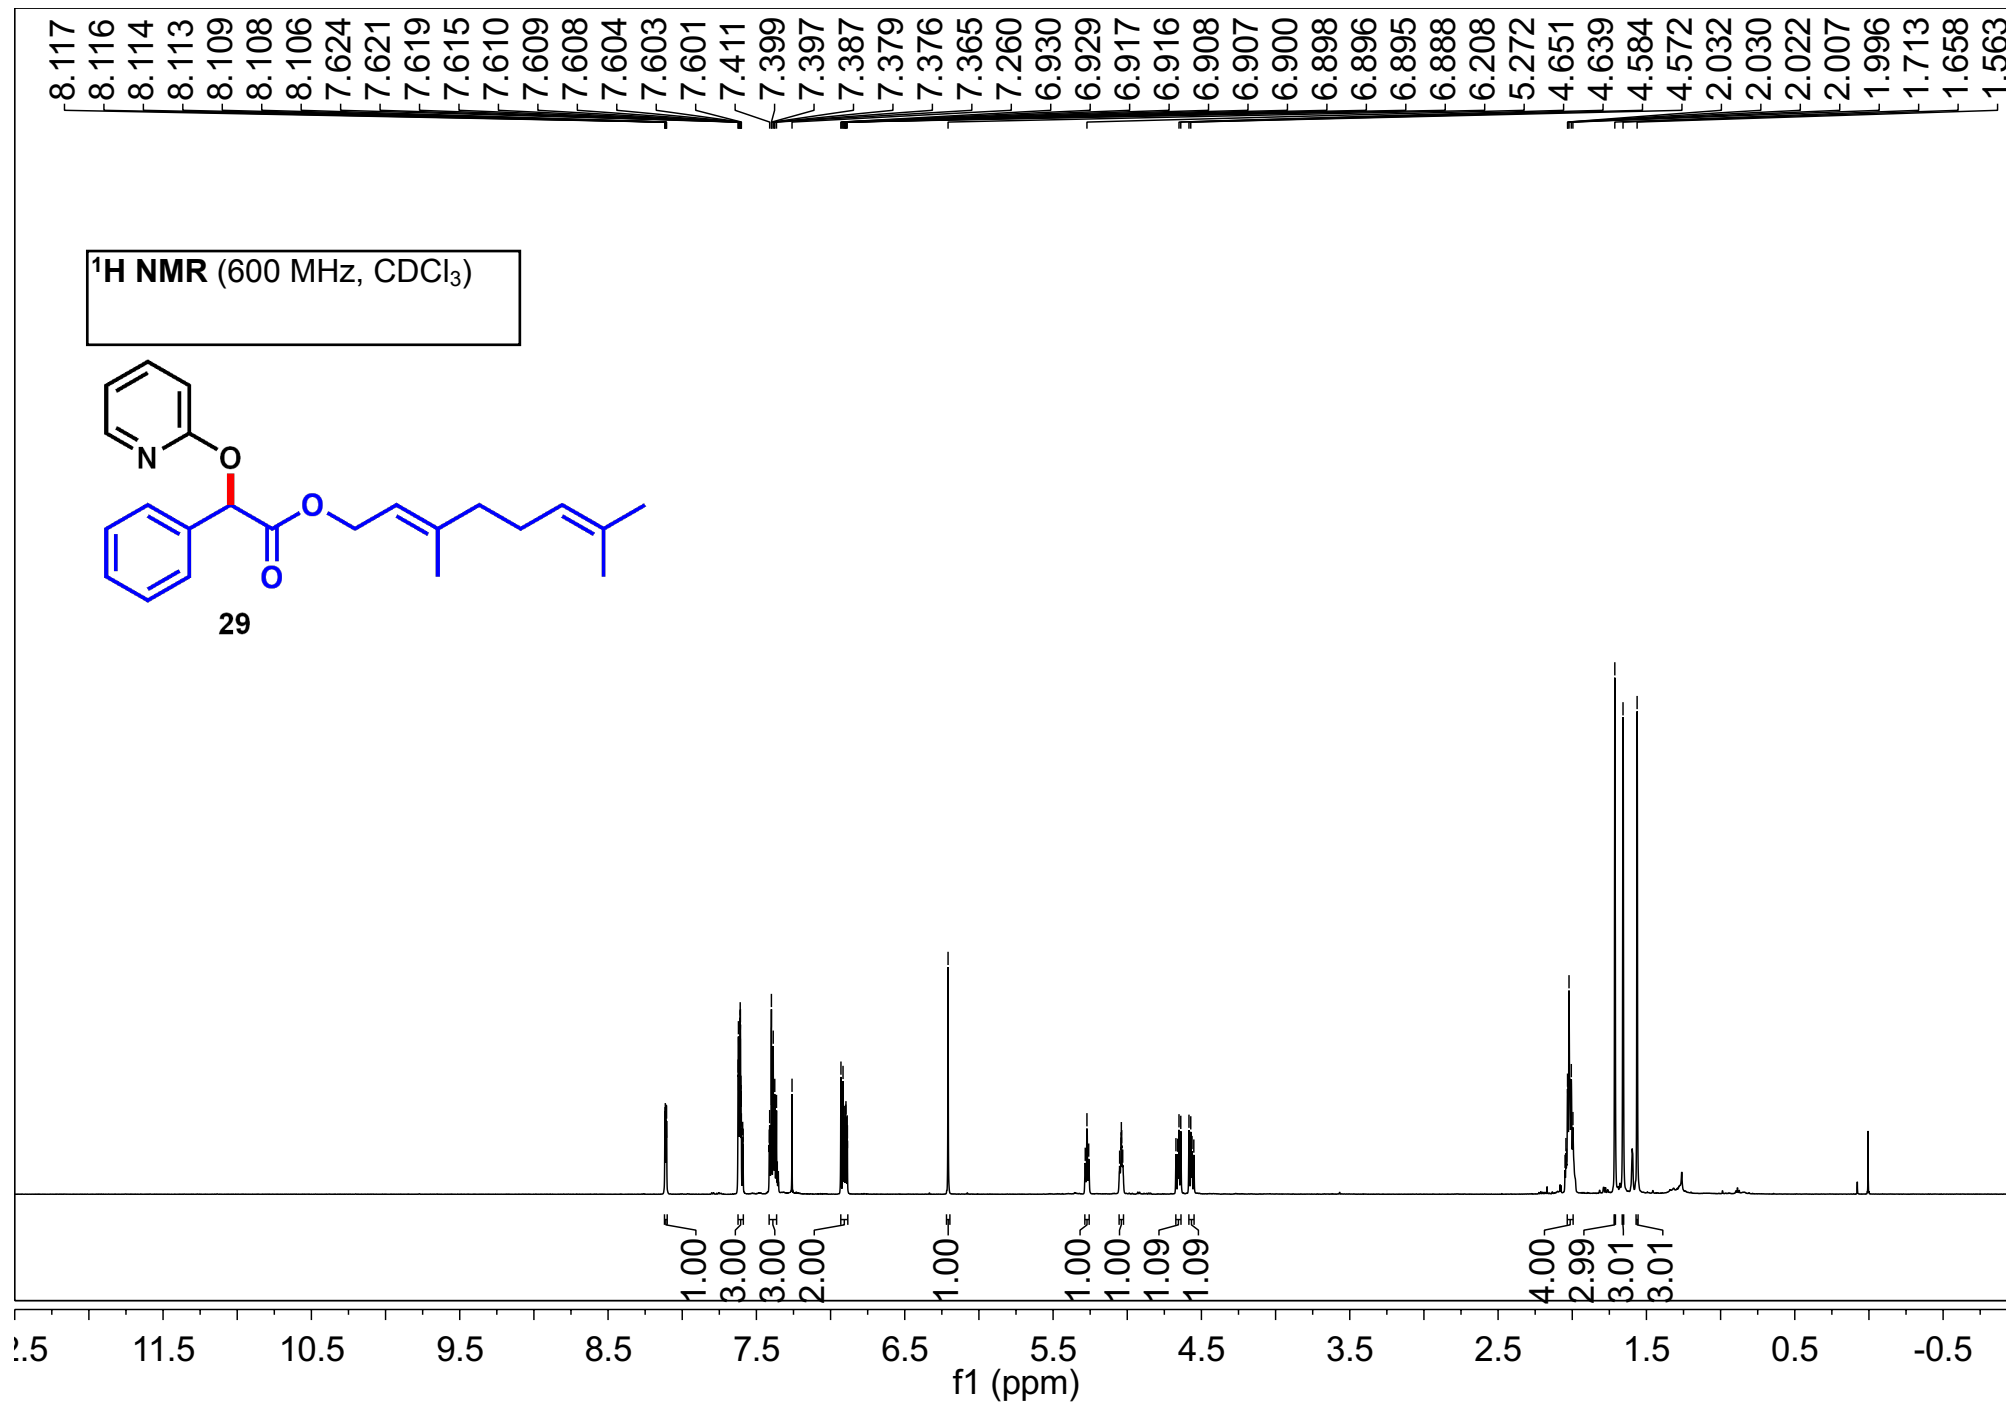

<sup>13</sup>C NMR (150 MHz, CDCl<sub>3</sub>)

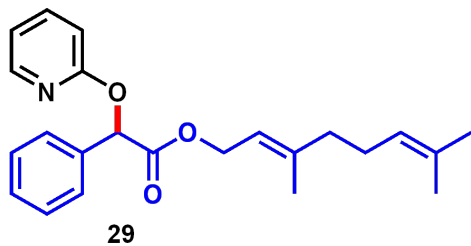

170.33  
162.35  
146.51  
142.73  
138.76  
135.20  
132.04  
128.77  
128.59  
127.66  
123.60  
118.73  
117.46  
111.26

77.21  
77.00  
76.79  
75.73  
61.87

32.12  
26.58  
25.64  
23.44  
17.62



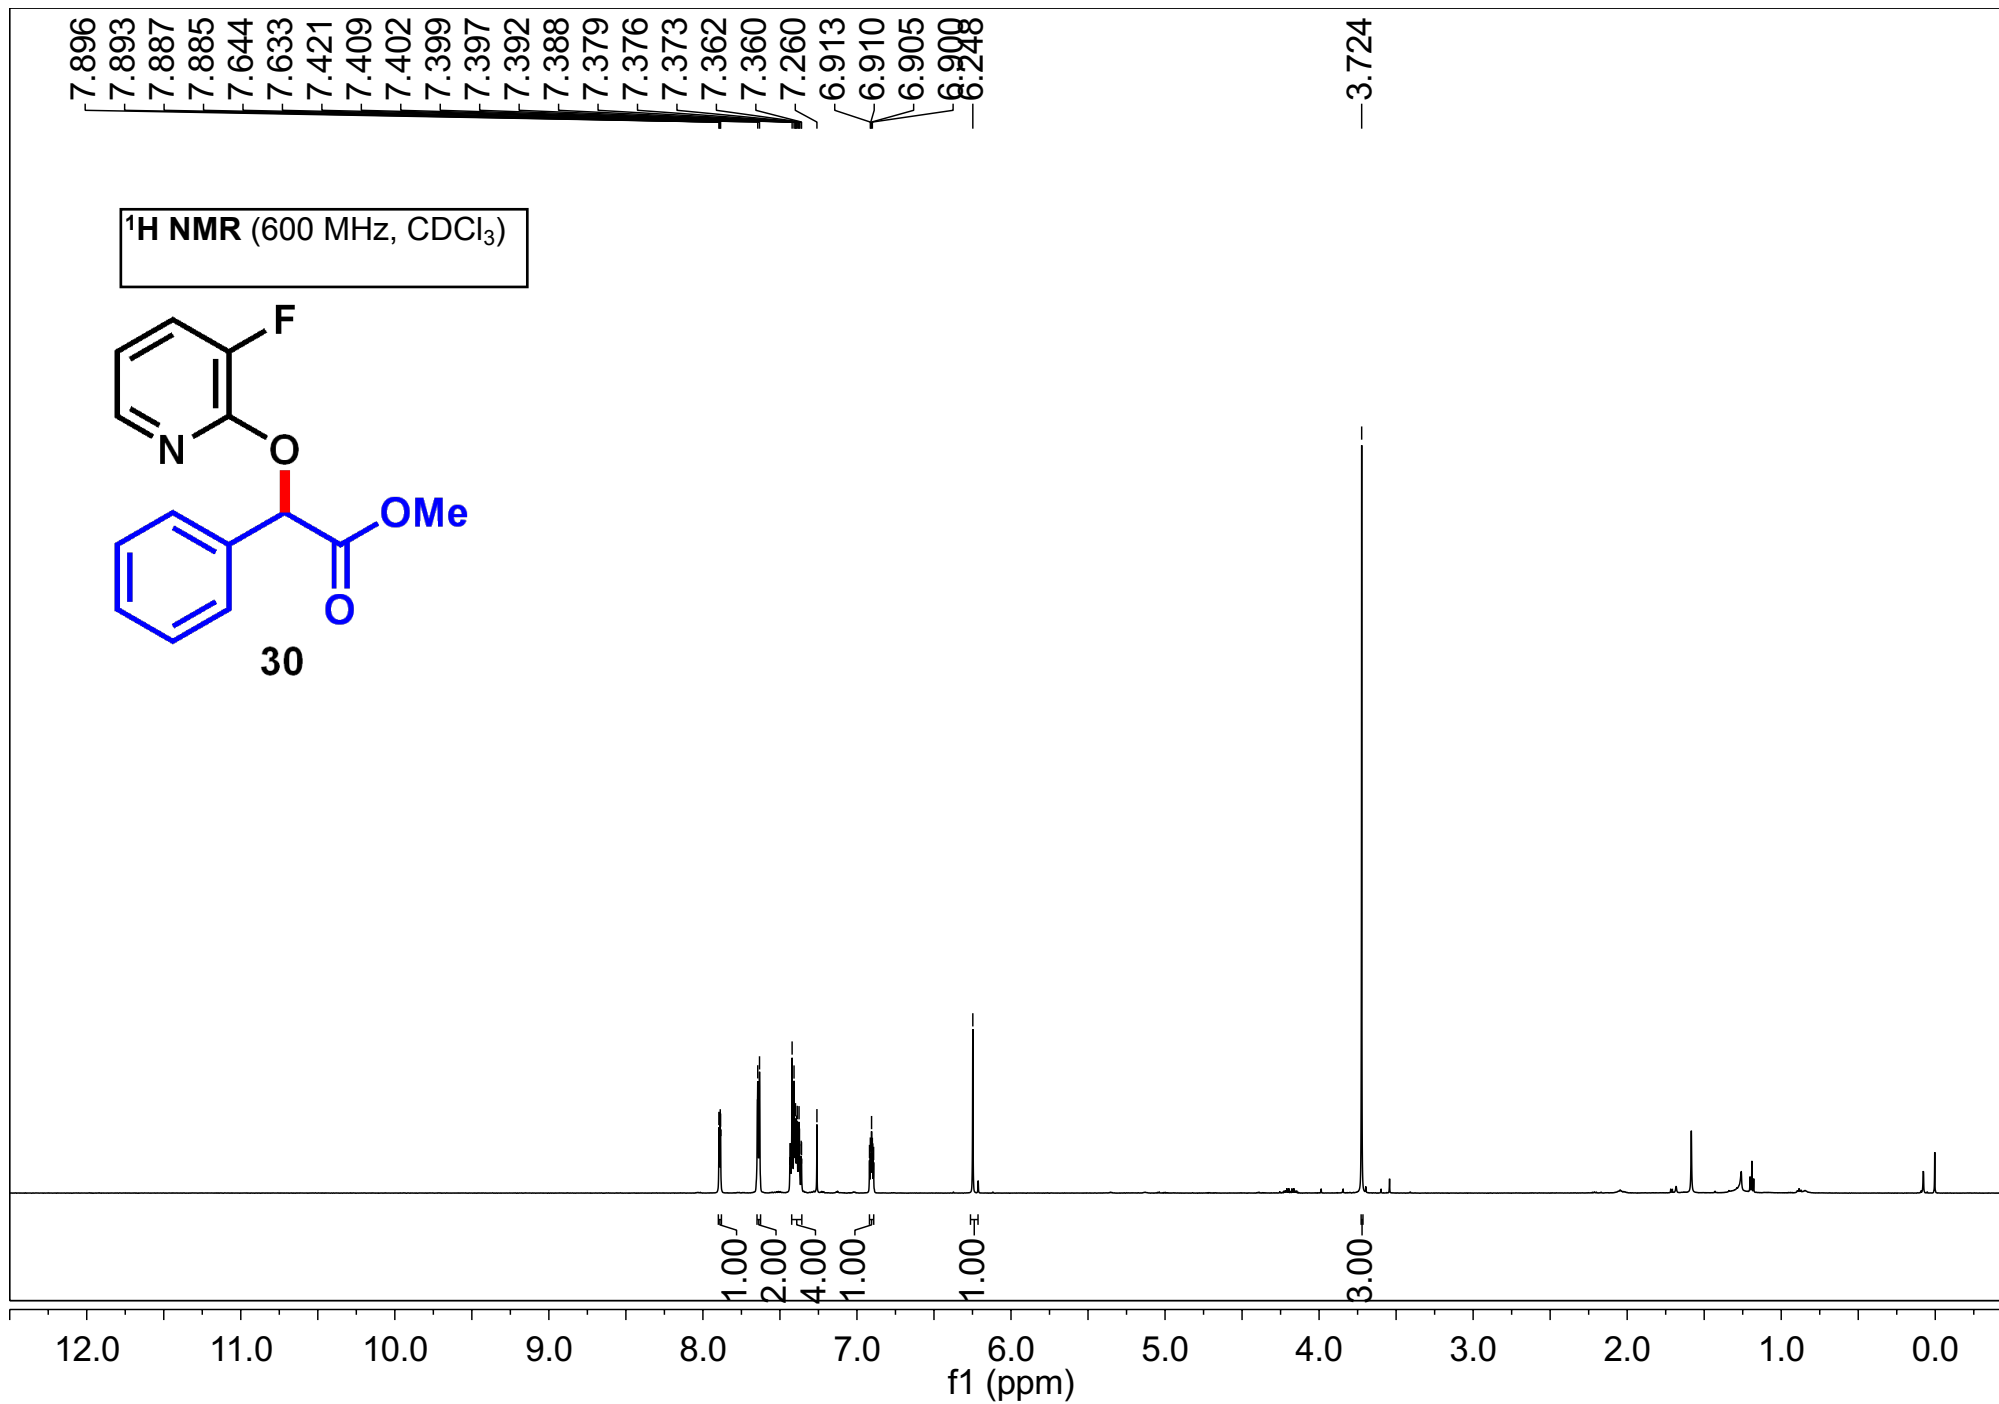



<sup>13</sup>C NMR (150 MHz, CDCl<sub>3</sub>)

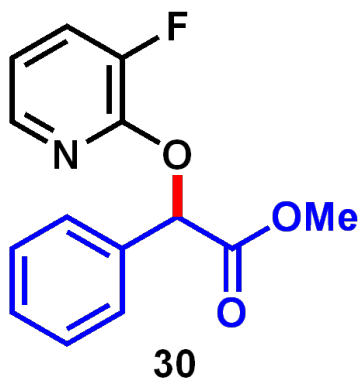

170.213  
151.635  
148.116  
146.395  
141.055  
141.013  
134.523  
129.046  
128.720  
127.592  
123.717  
123.617  
117.907

77.212  
77.000  
76.788  
75.843

52.470



<sup>19</sup>F NMR (376 MHz, CDCl<sub>3</sub>)

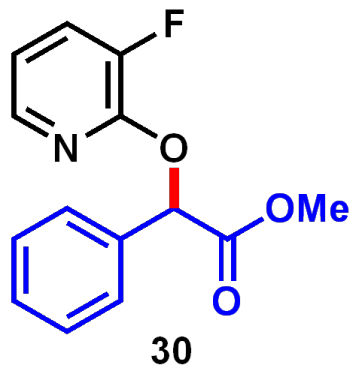

138.627  
138.631  
138.634  
138.653  
138.659

105 -100 -105 -110 -115 -120 -125 -130 -135 -140 -145 -150 -155 -160 -165 -170  
f1 (ppm)

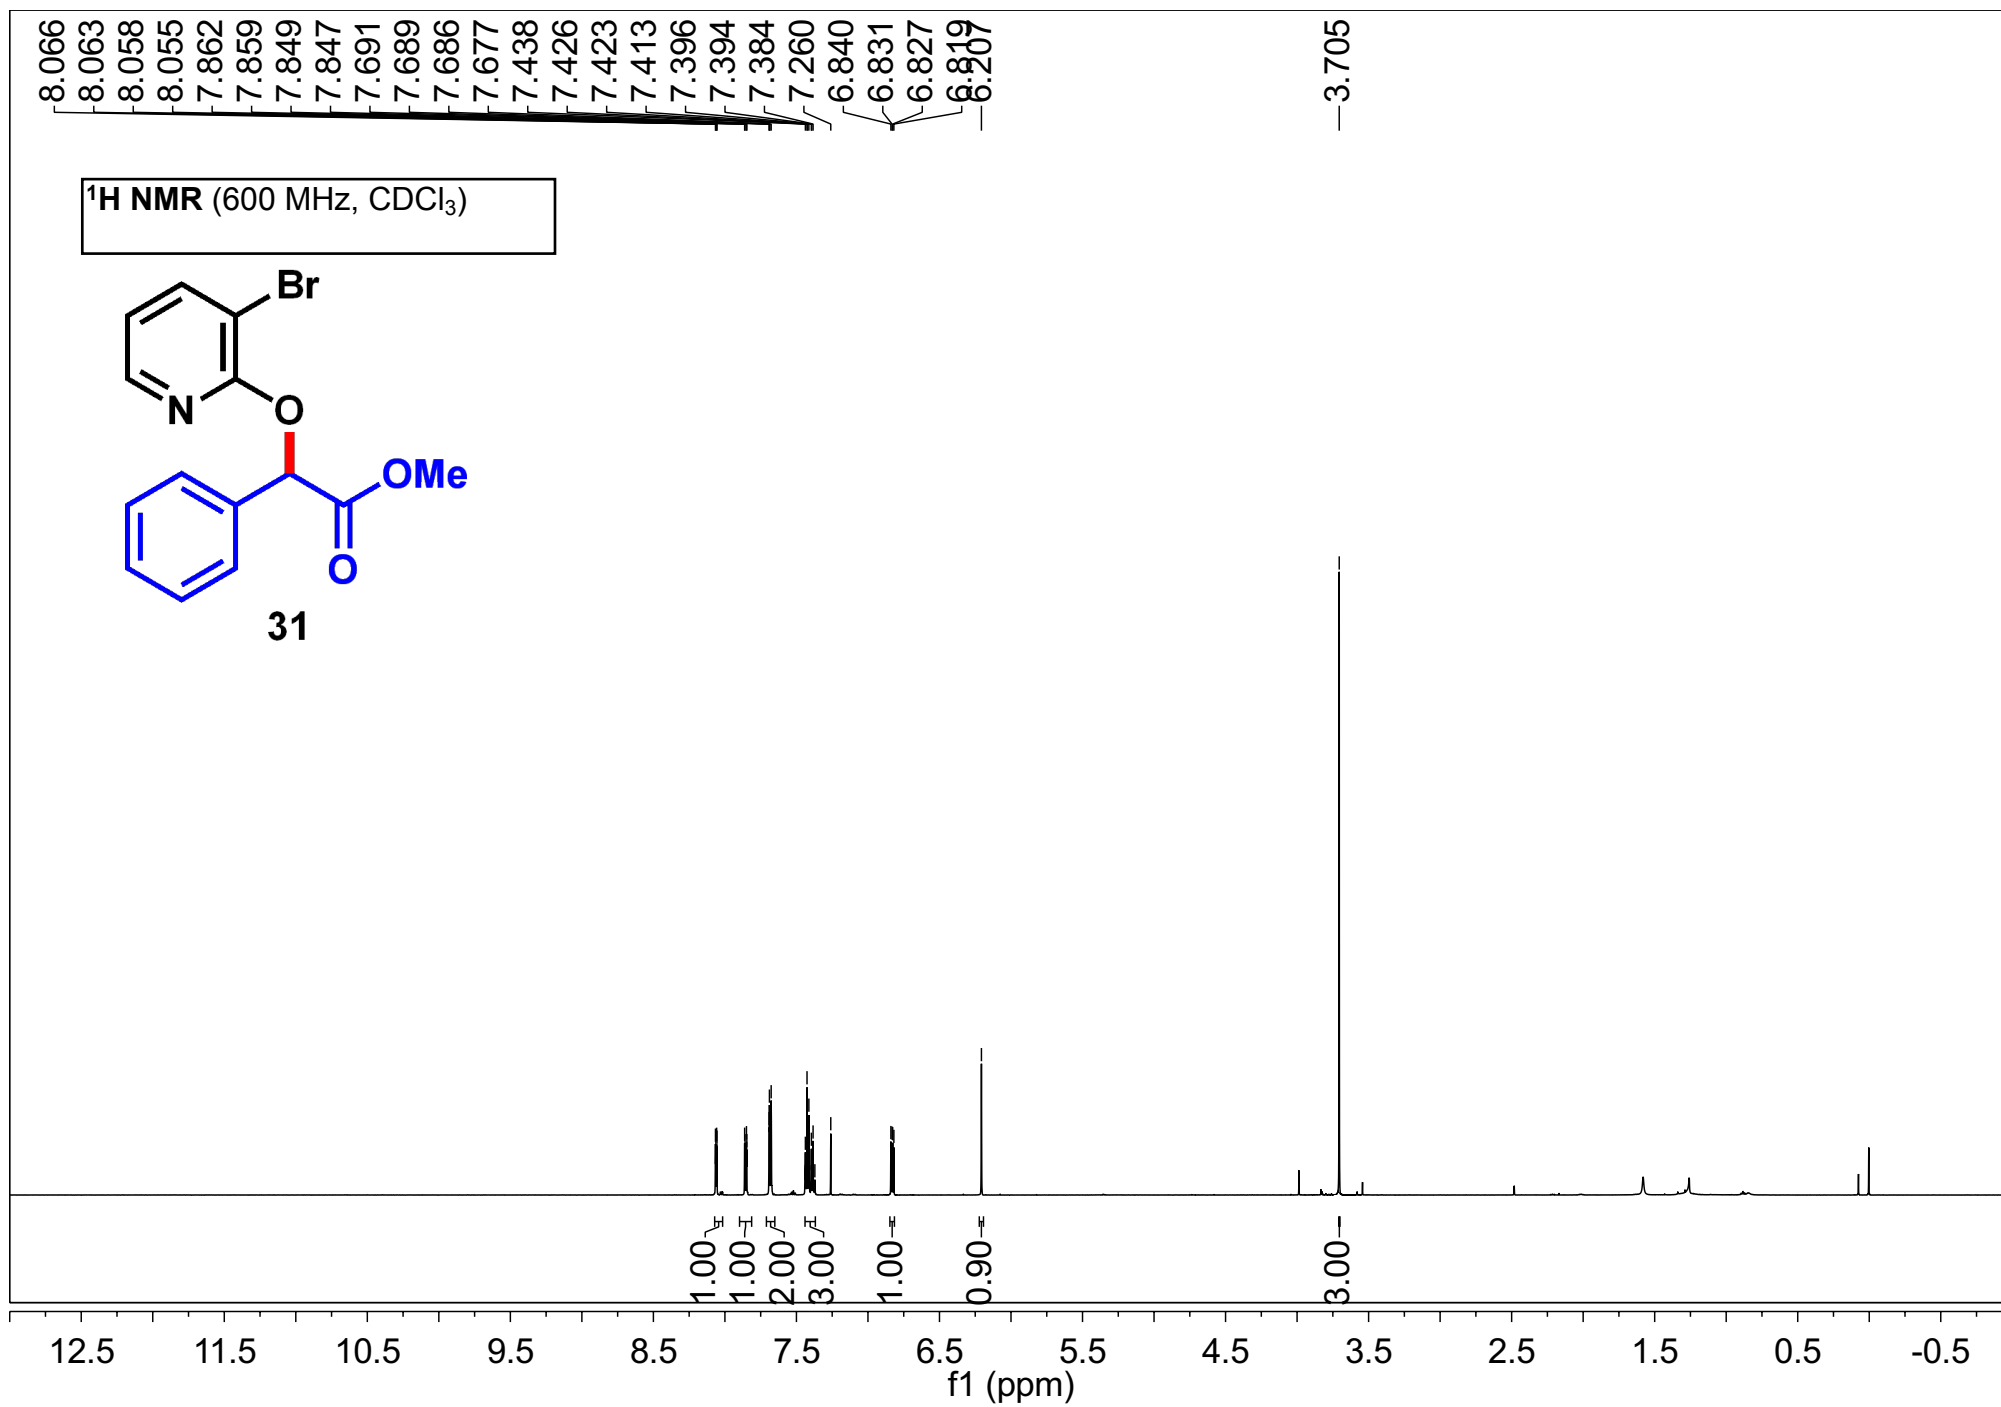

<sup>13</sup>C NMR (150 MHz, CDCl<sub>3</sub>)

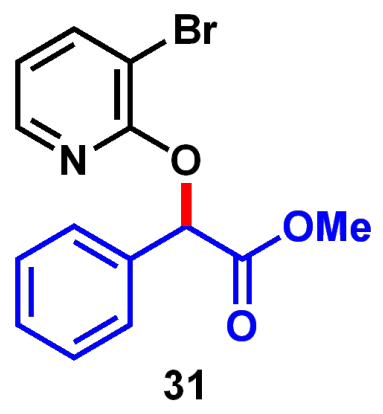

—170.21 —158.54 —145.16 —142.03 —134.63 —128.88 —128.66 —127.29 —118.65 —107.04 {77.21 77.00 76.79 76.40} —52.45

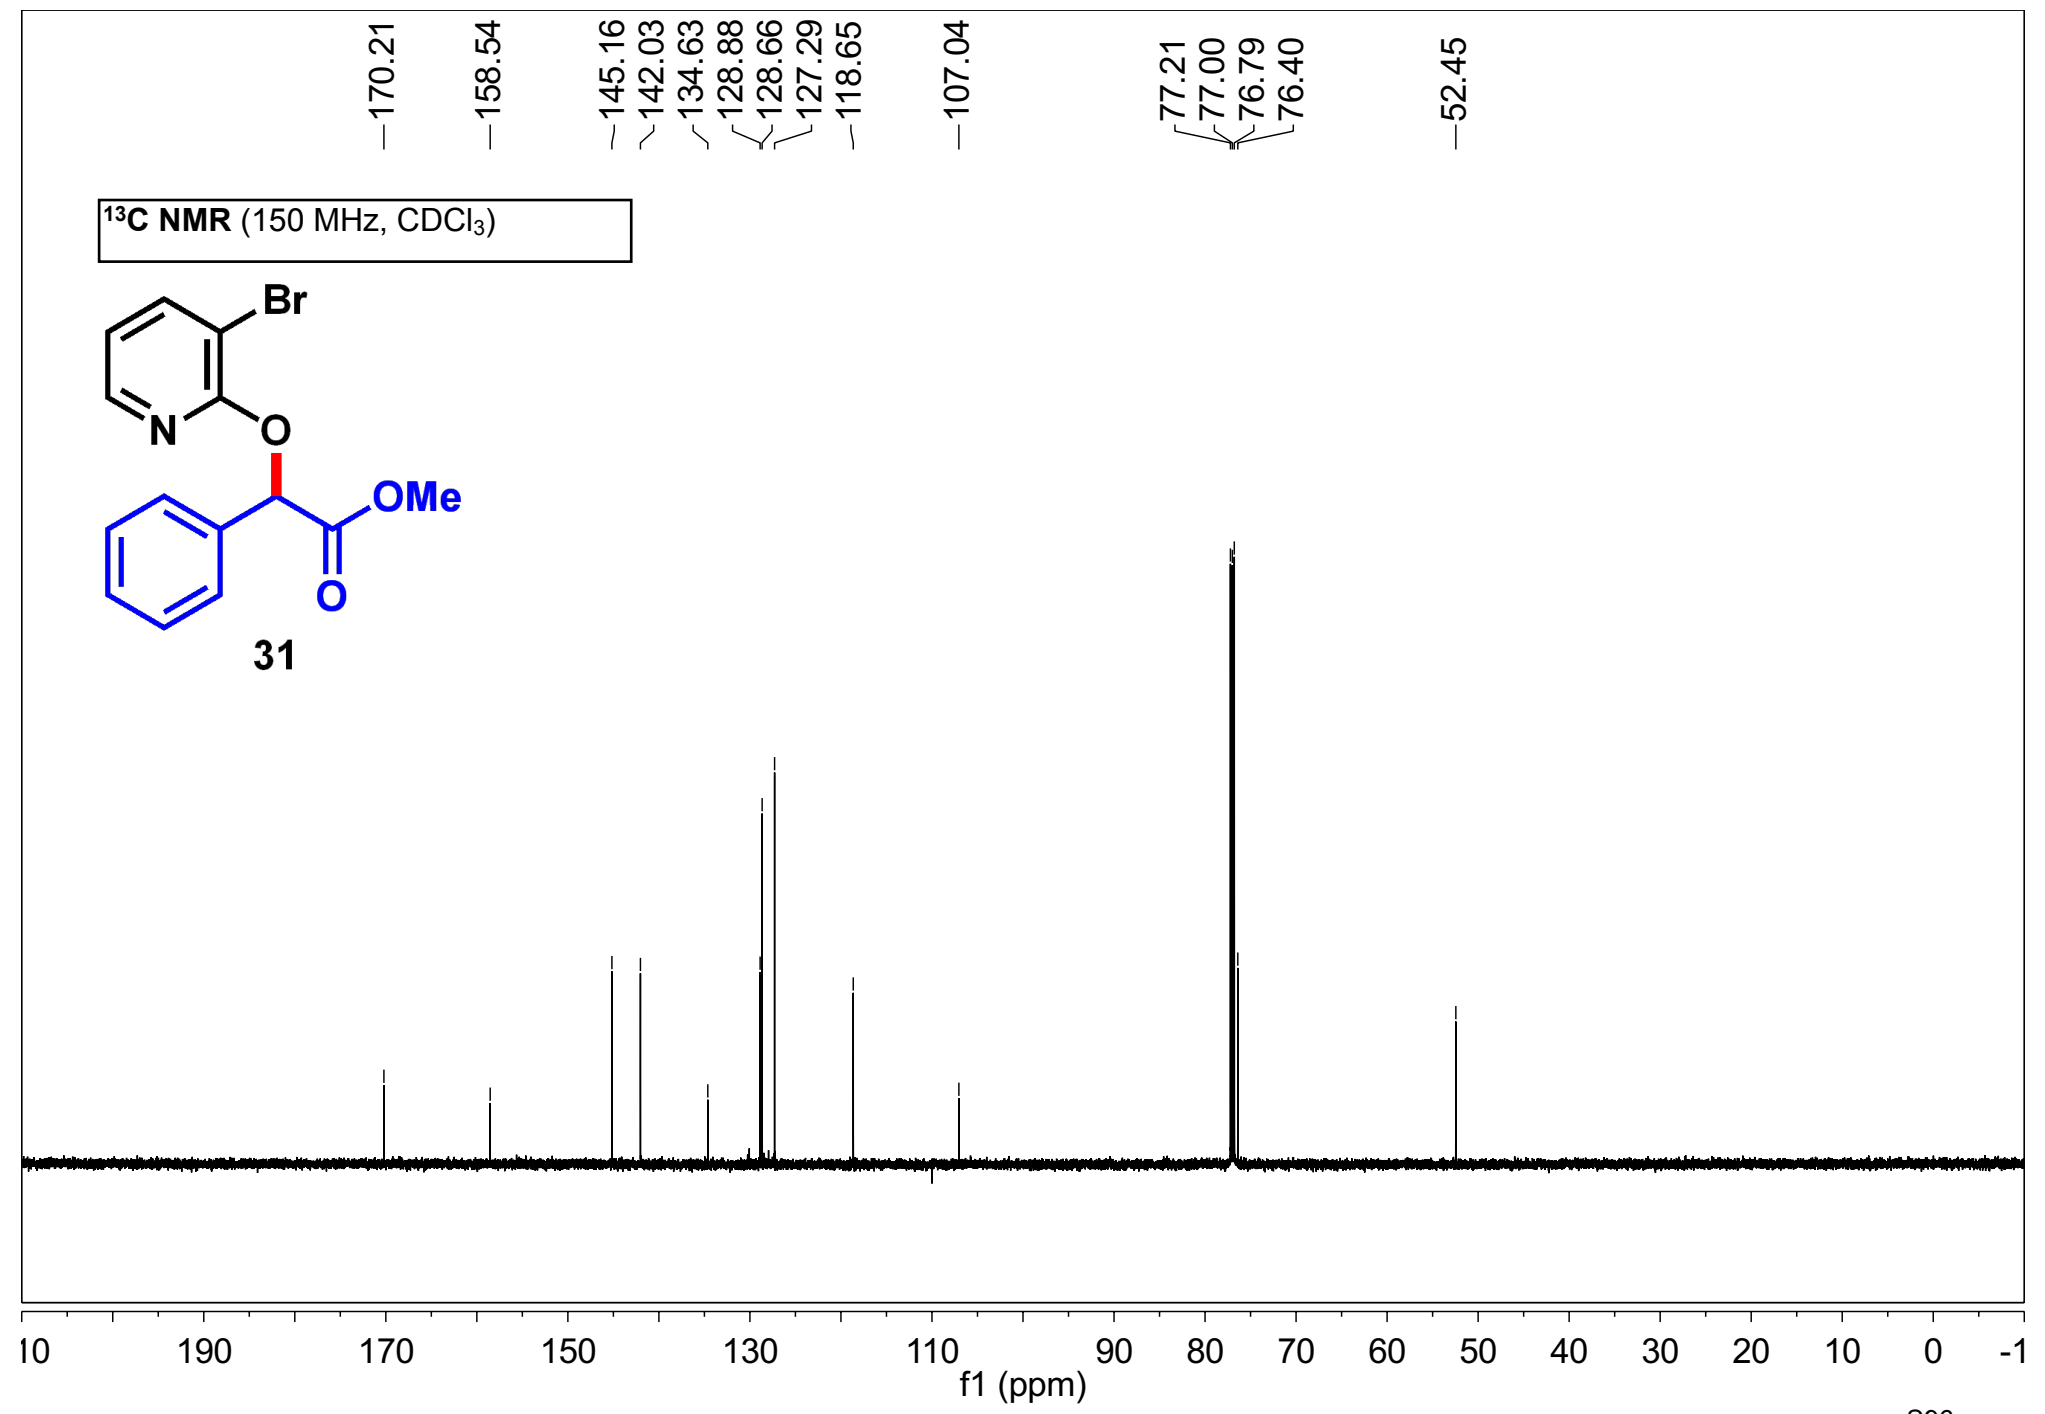

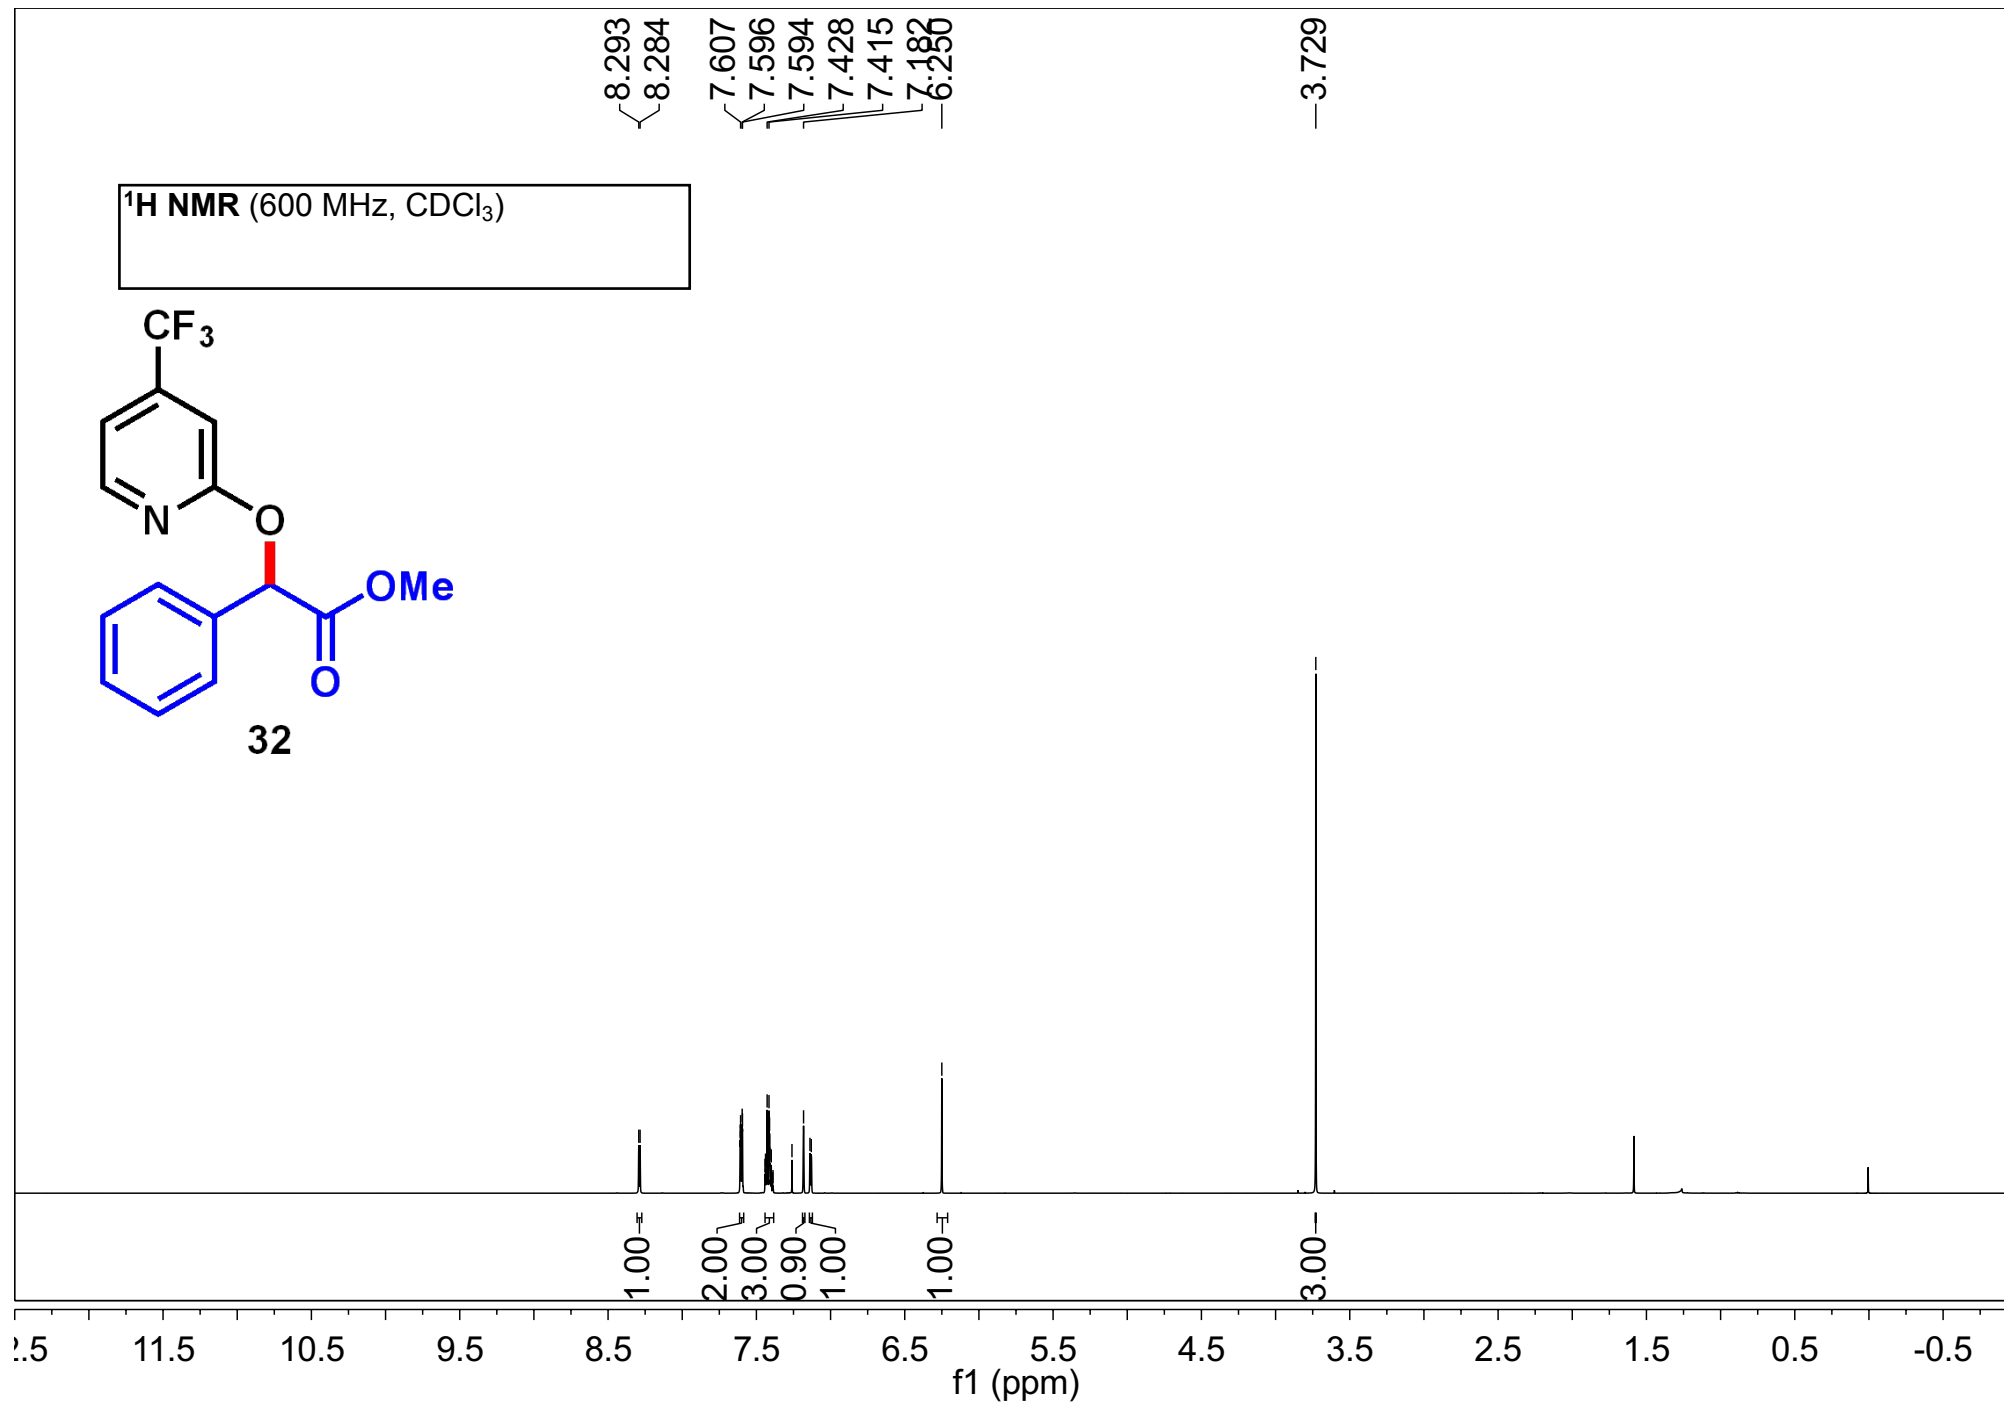

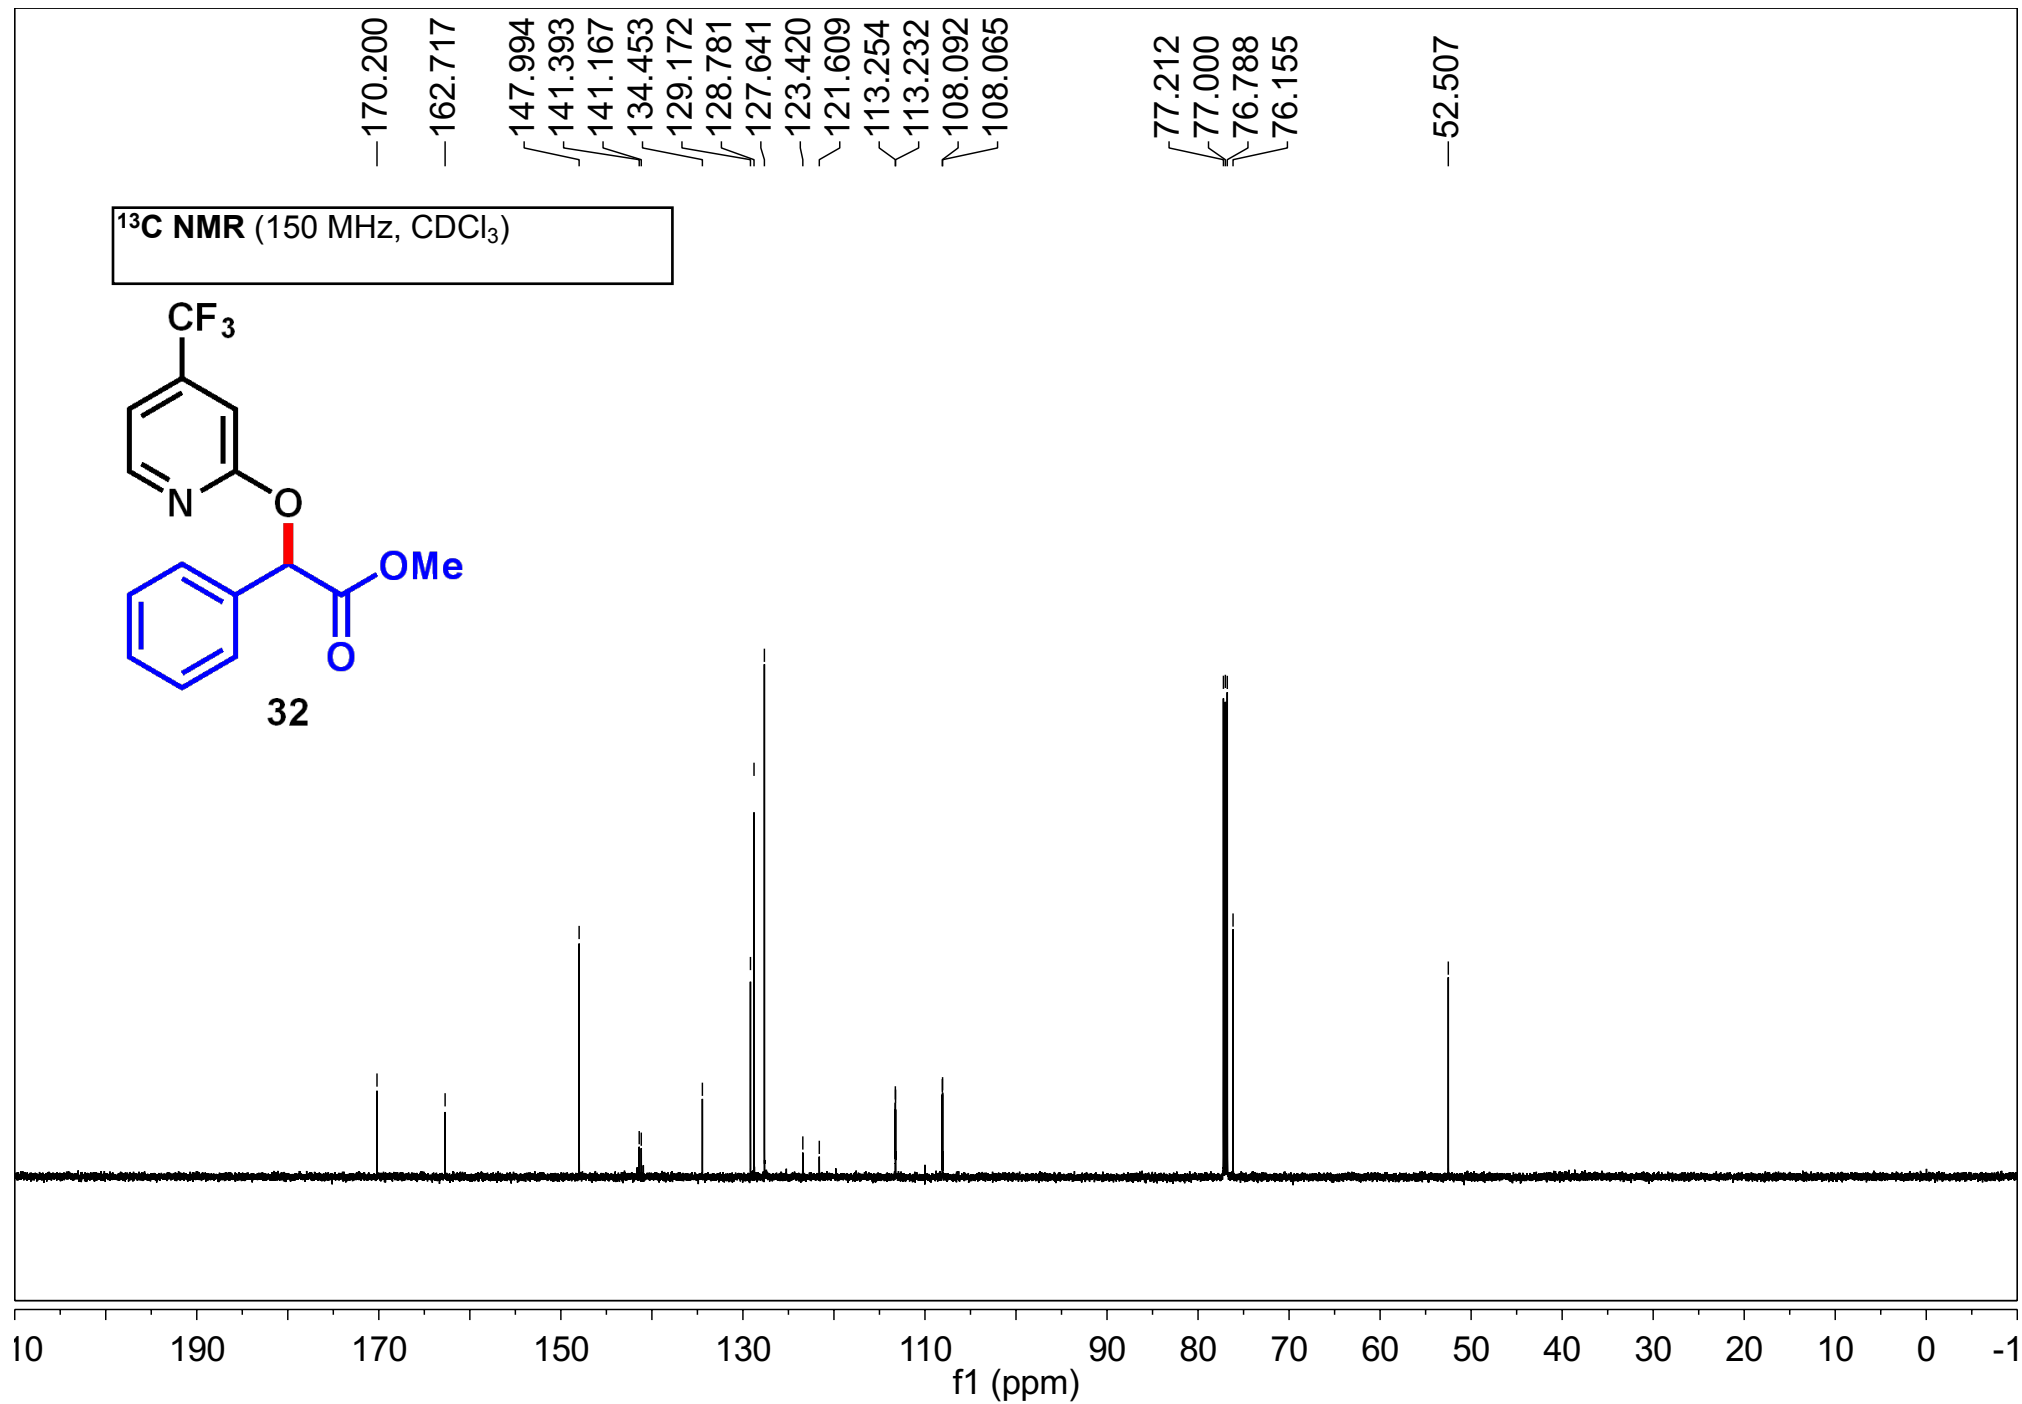

<sup>19</sup>F NMR (376 MHz, CDCl<sub>3</sub>)

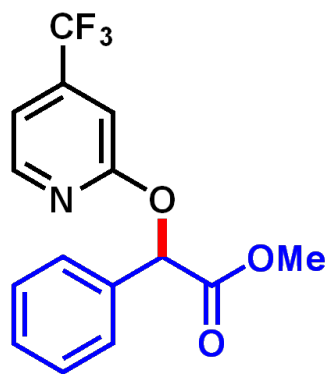

32

--70.154

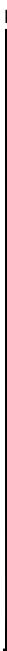

20 10 0 -10 -20 -30 -40 -50 -60 -70 -80 -90 -100 -120 -140 -160 -180  
f1 (ppm)

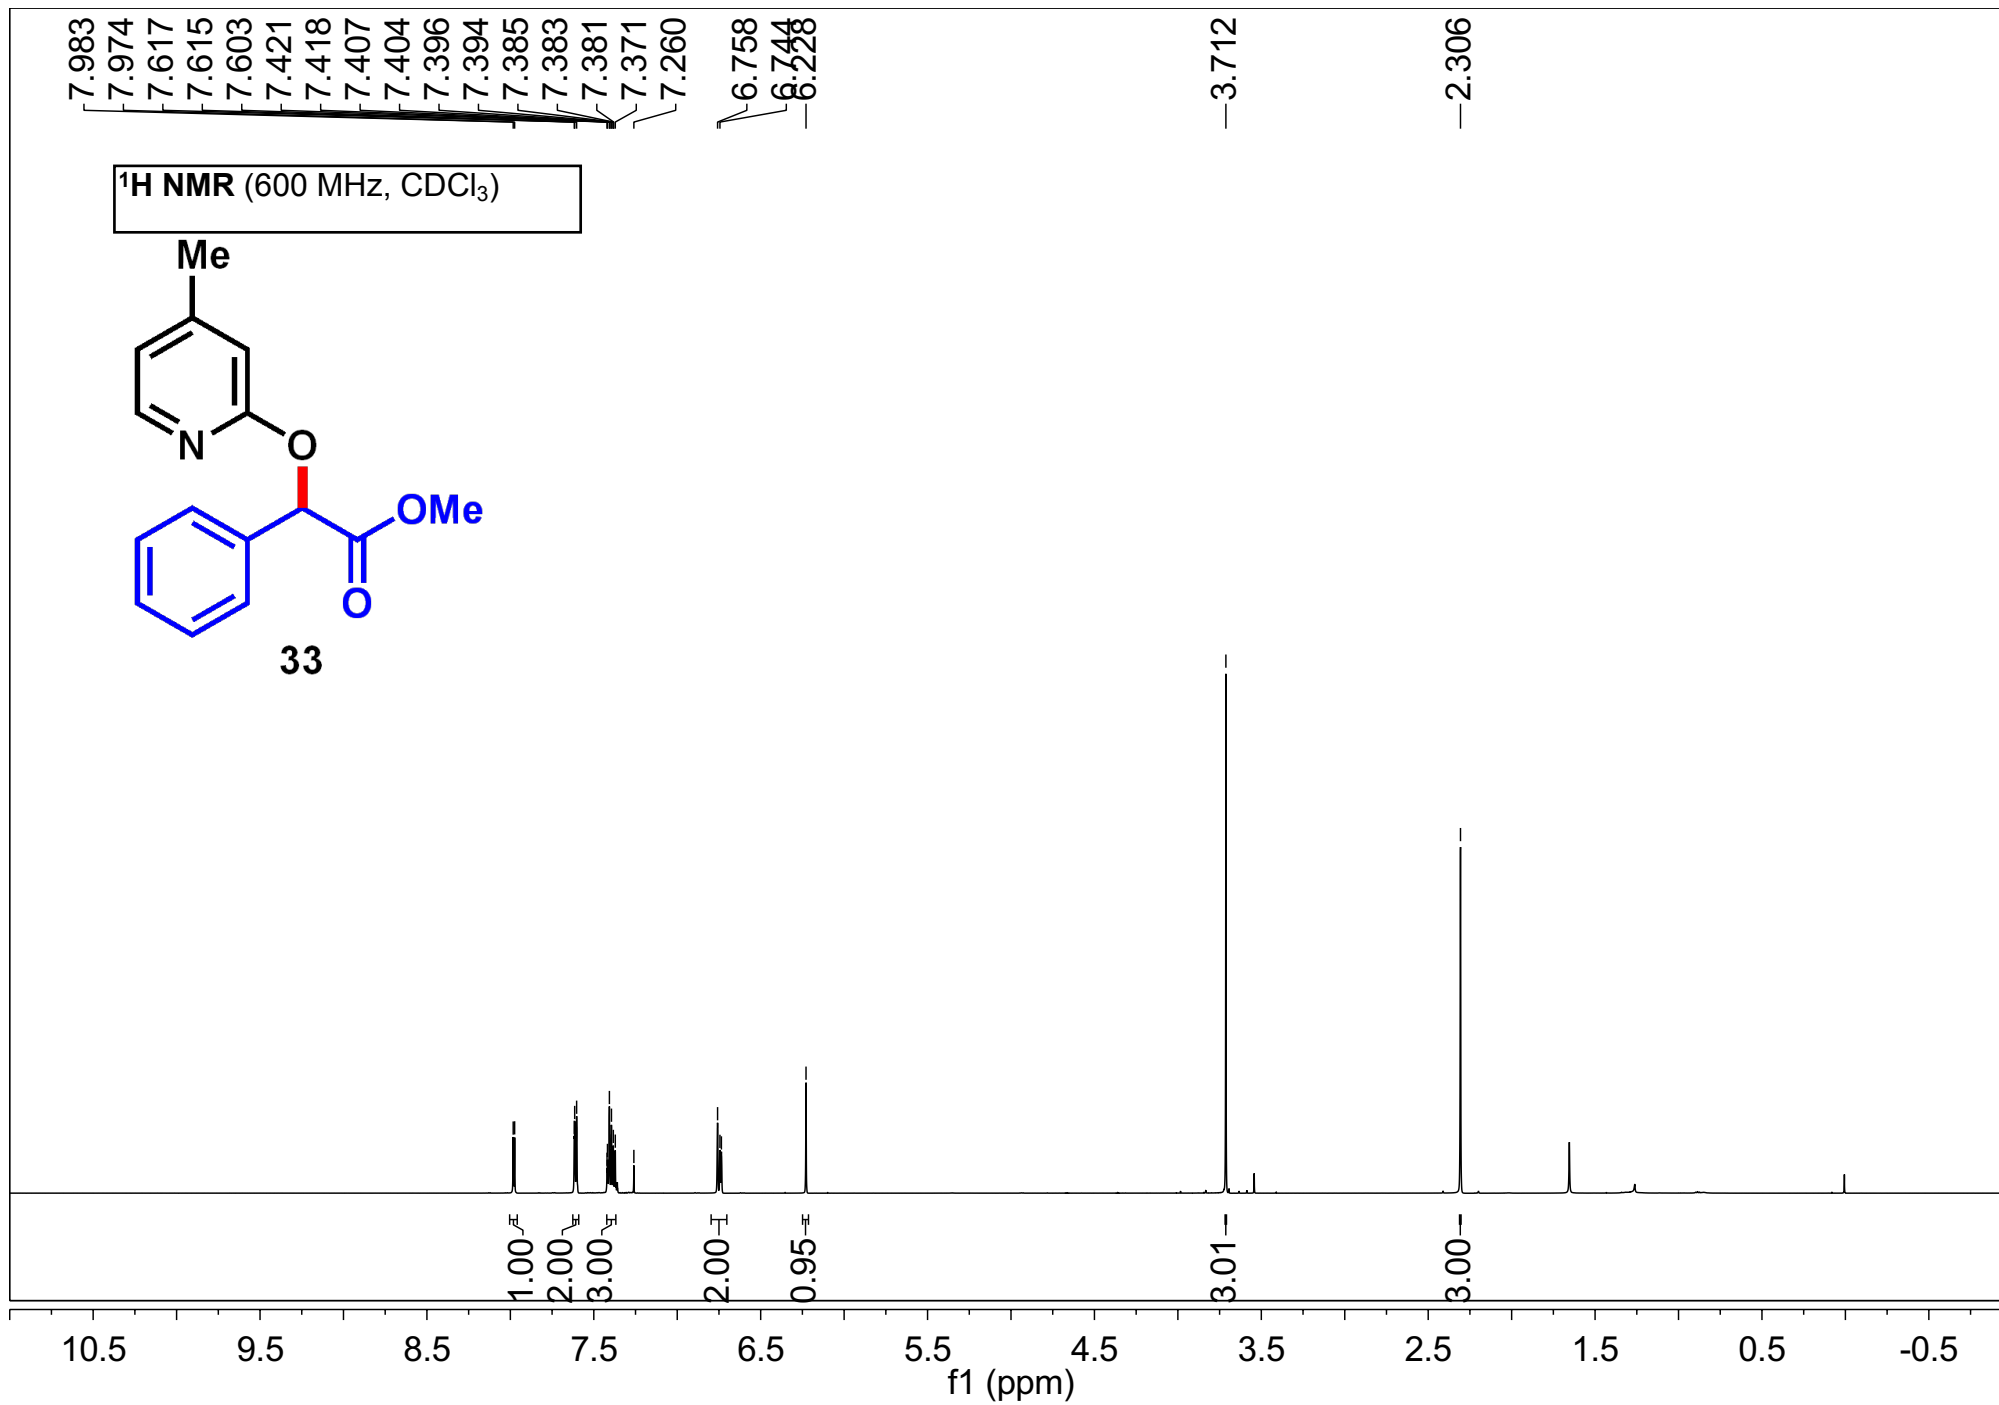



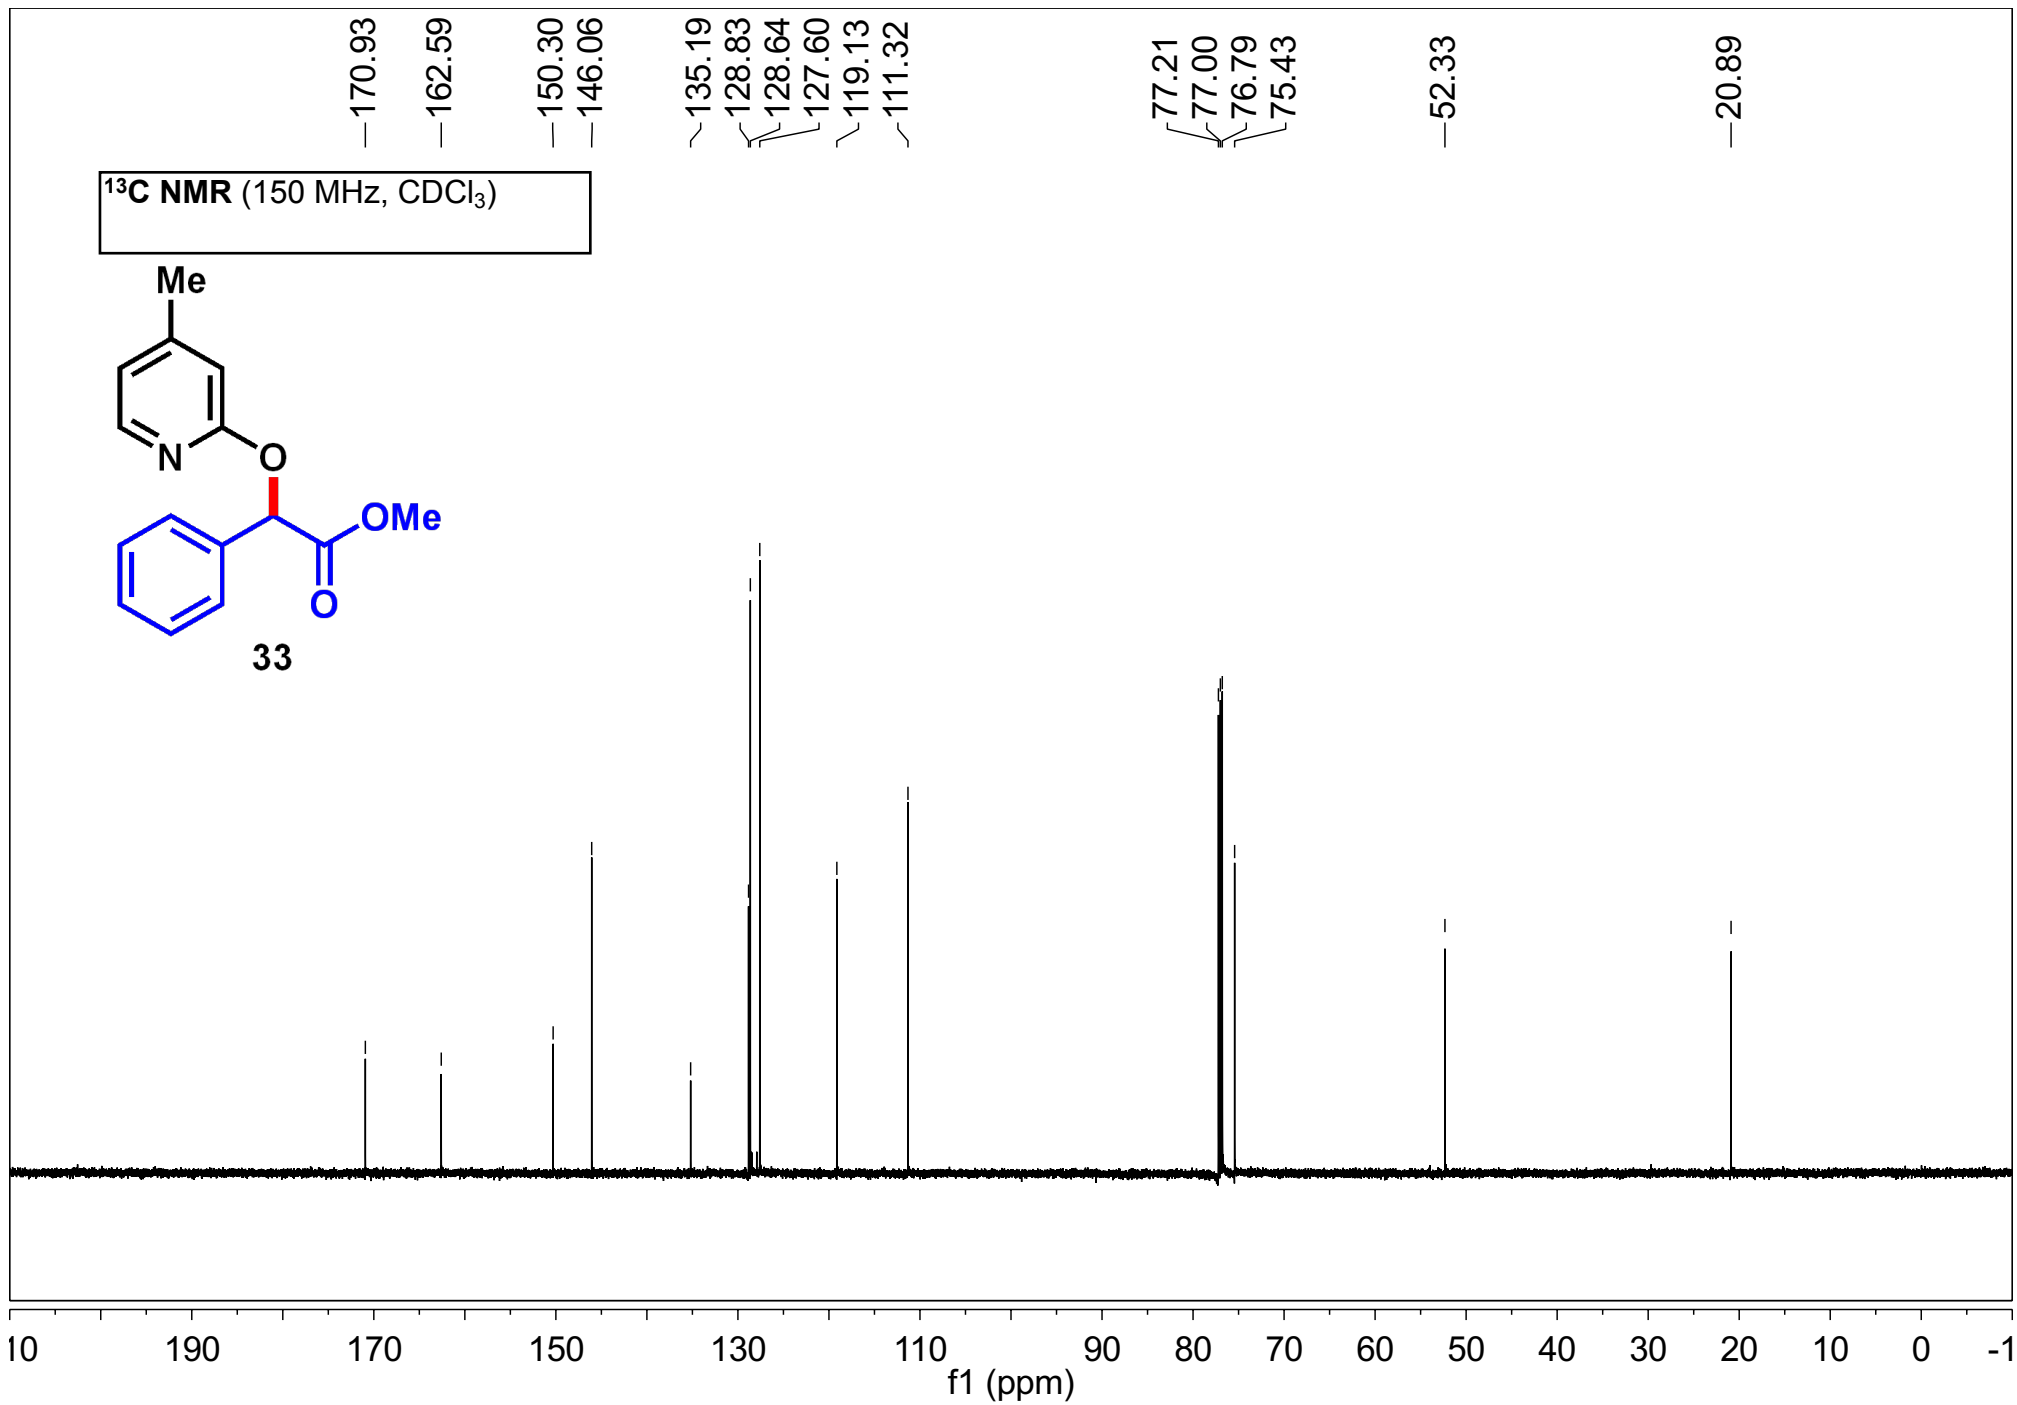

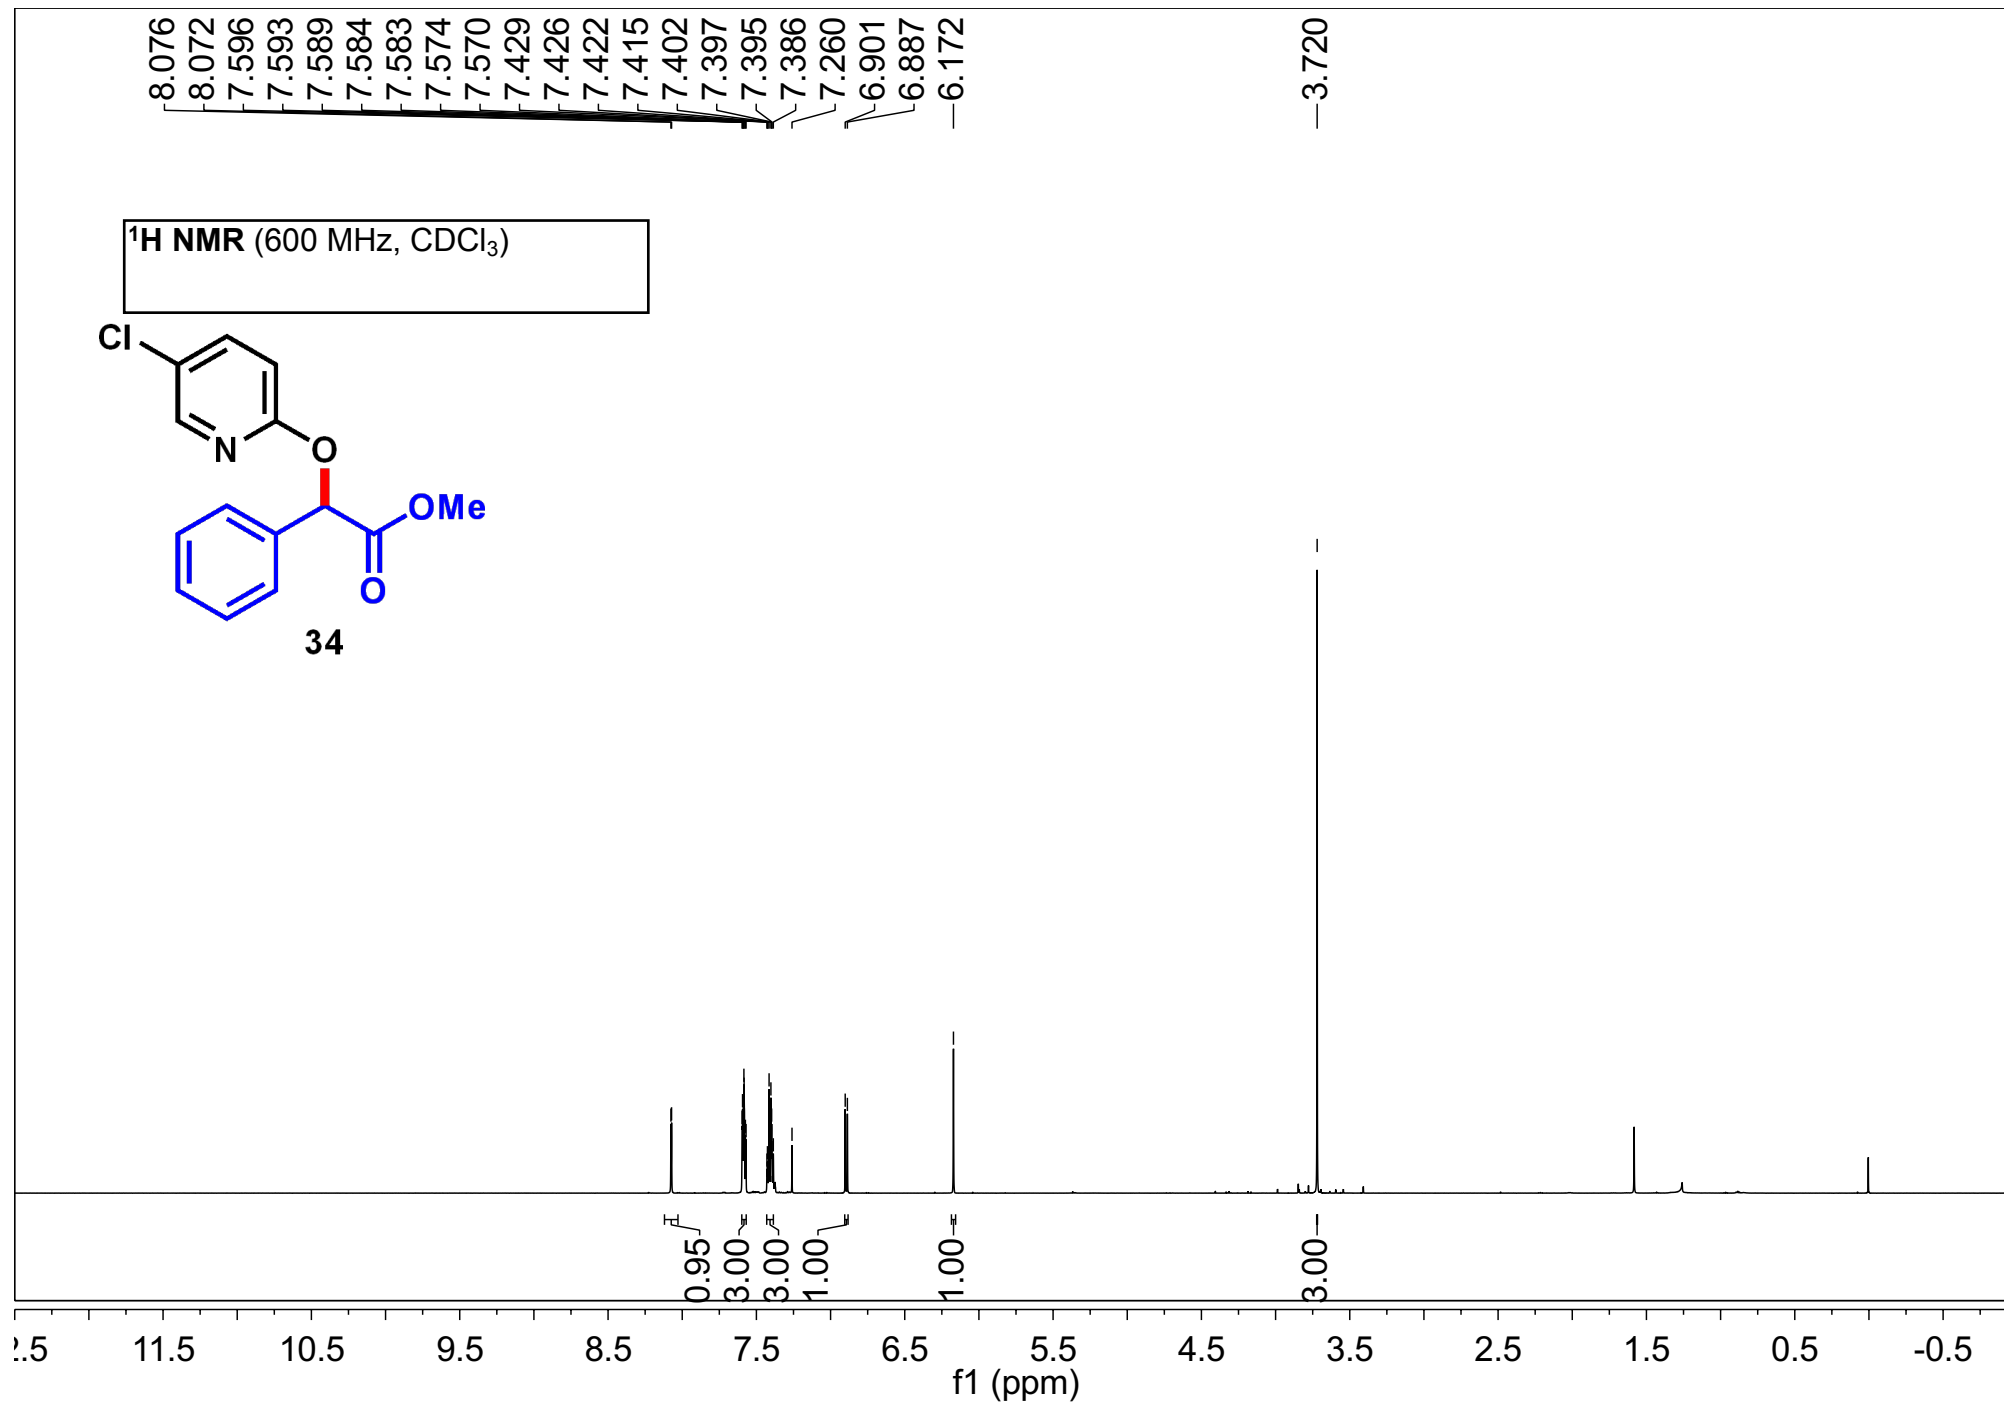

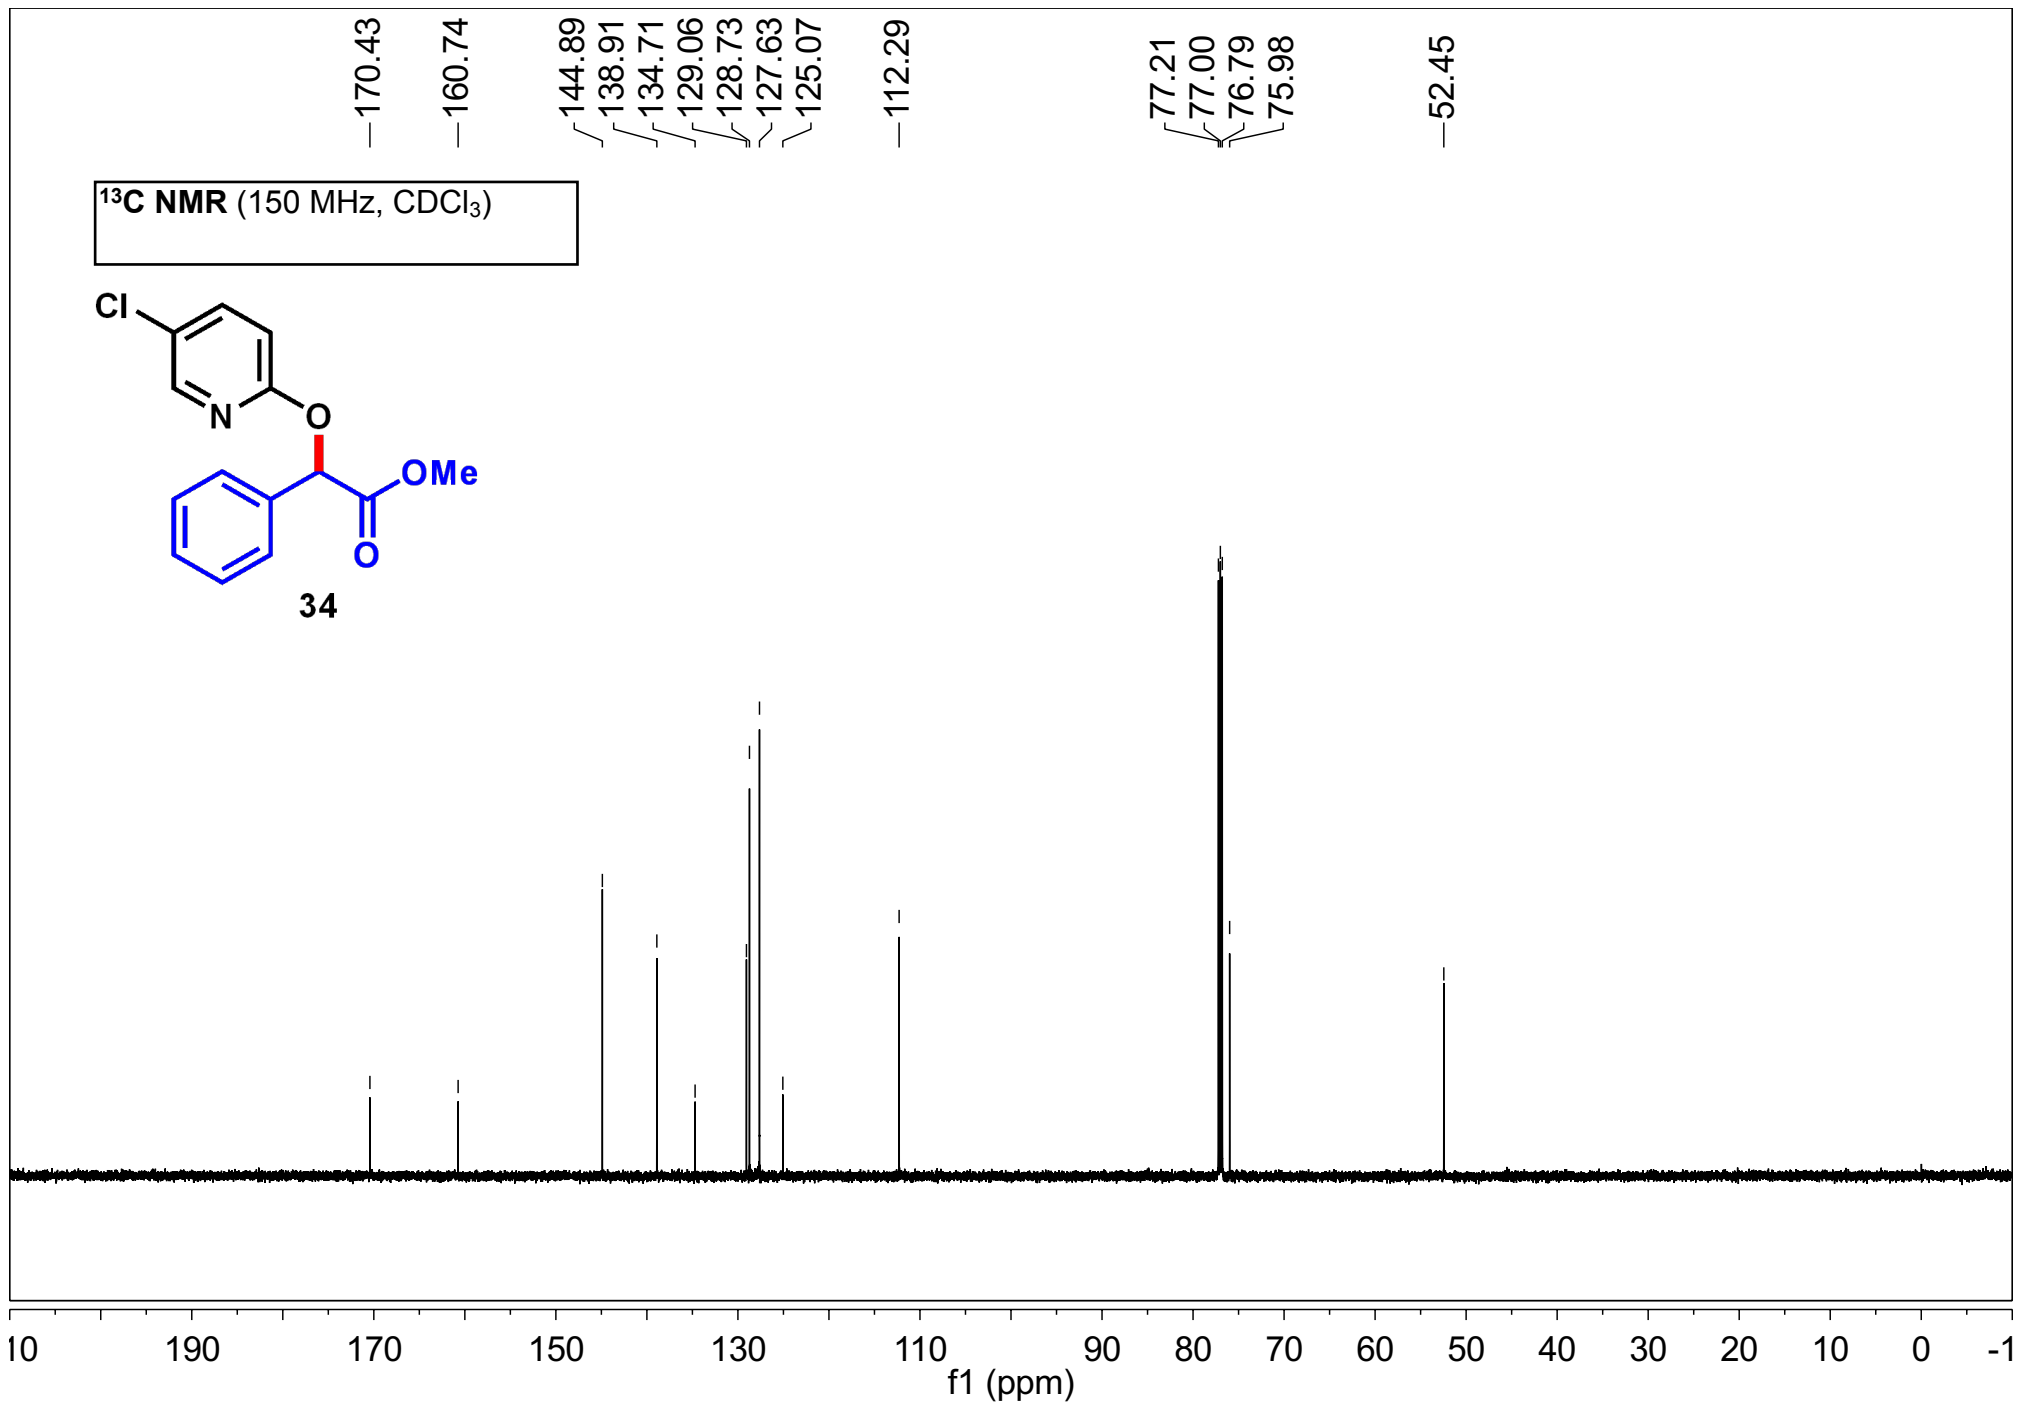

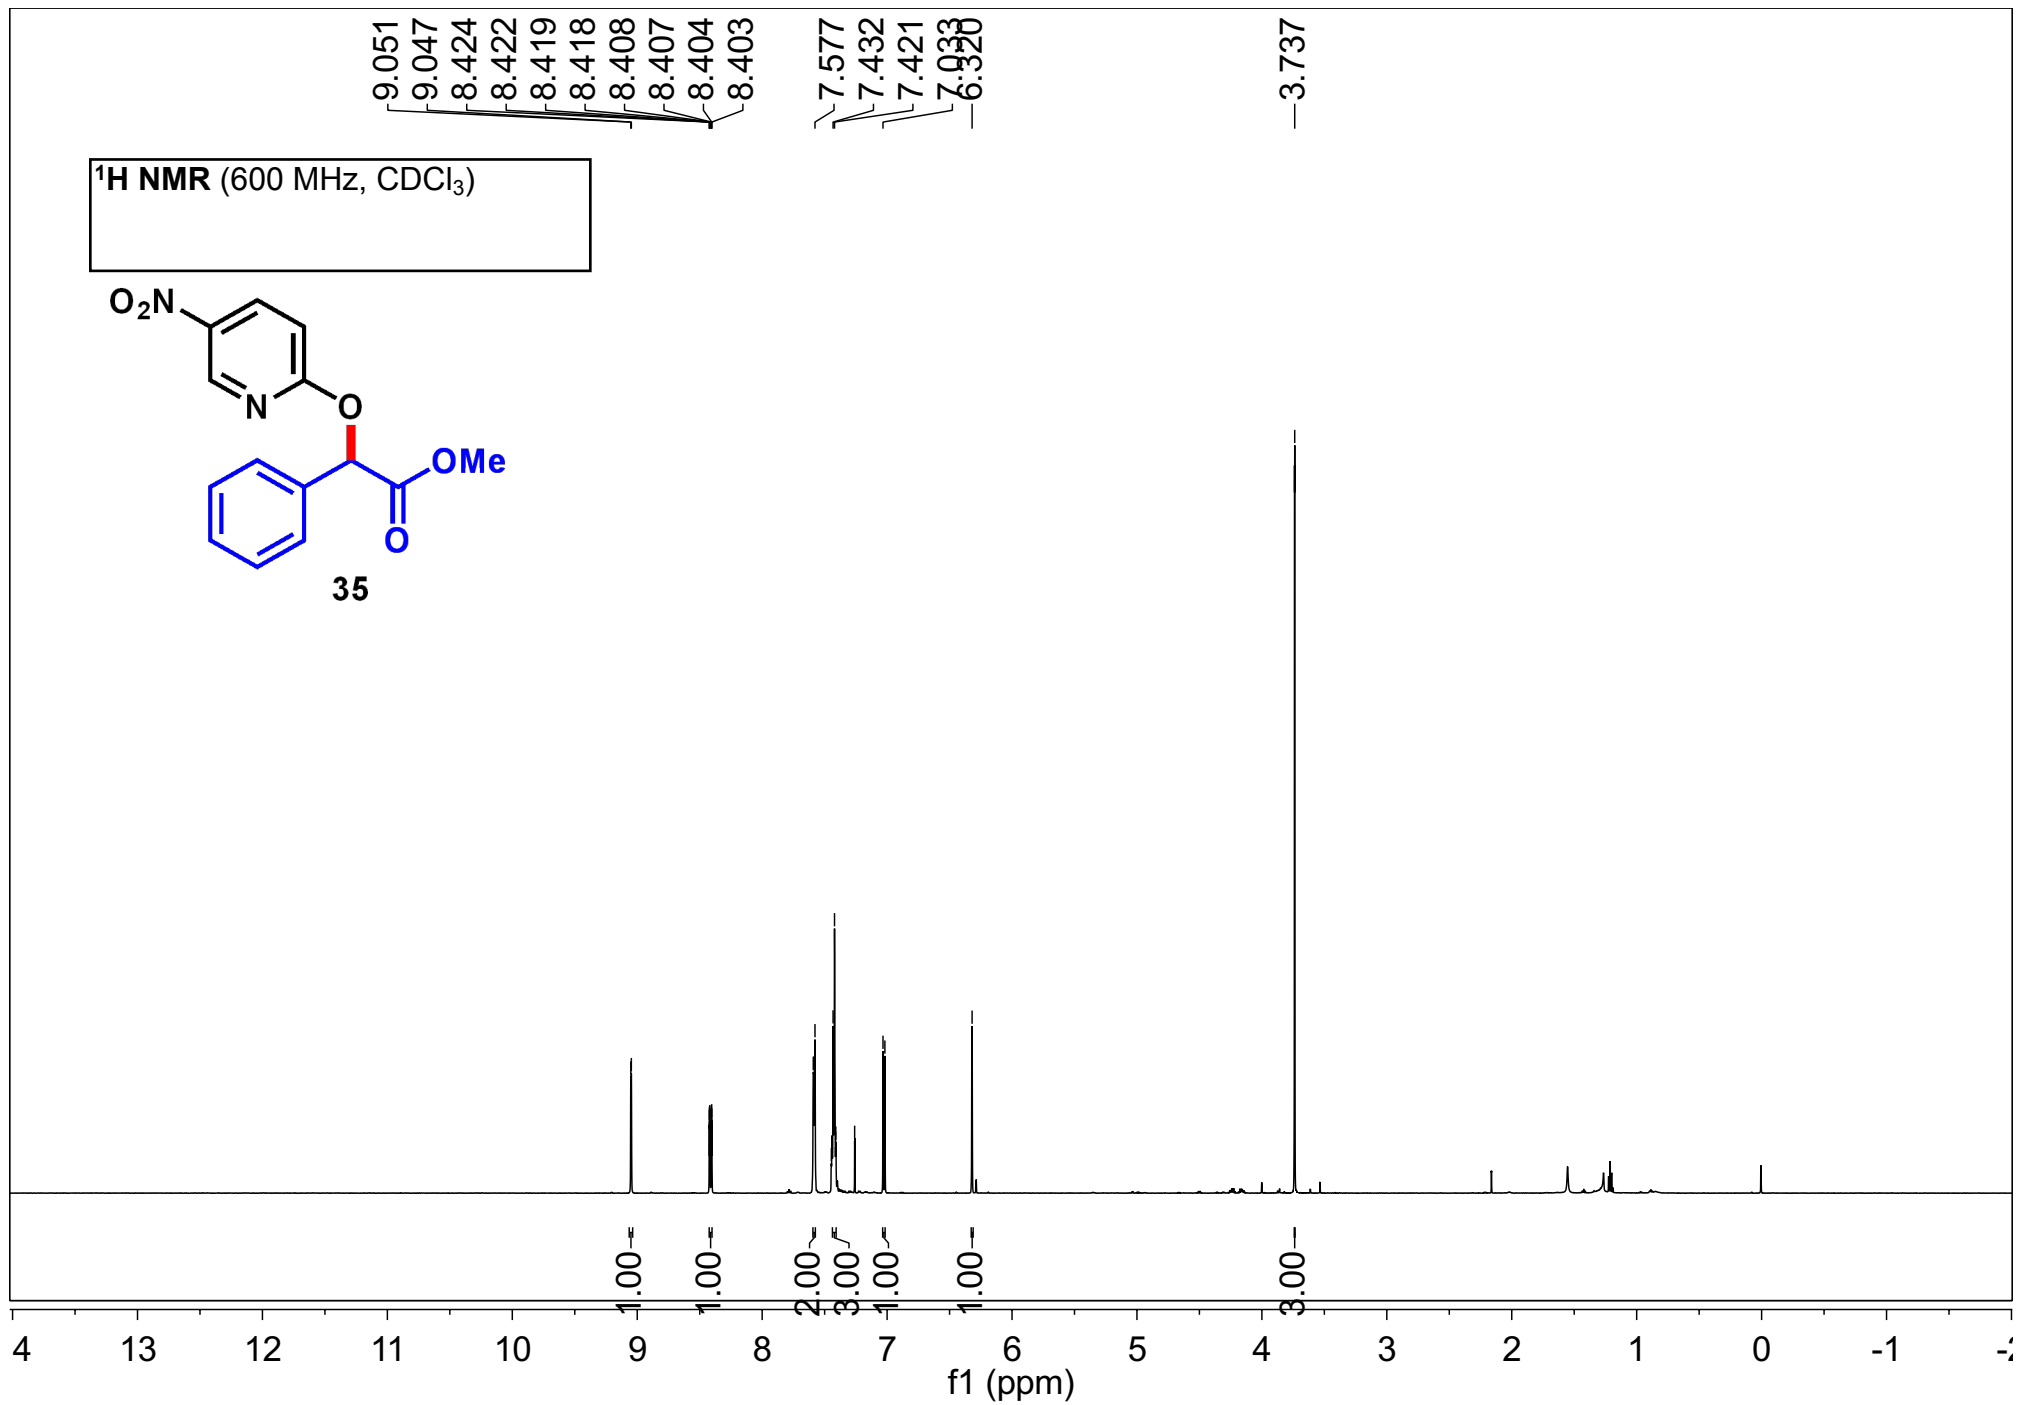

<sup>13</sup>C NMR (150 MHz, CDCl<sub>3</sub>)

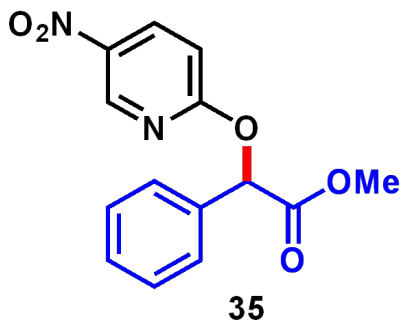

169.53  
165.57  
144.34  
140.24  
134.38  
134.00  
129.40  
128.86  
127.73

111.59

77.21  
77.00  
76.98  
76.79

52.59



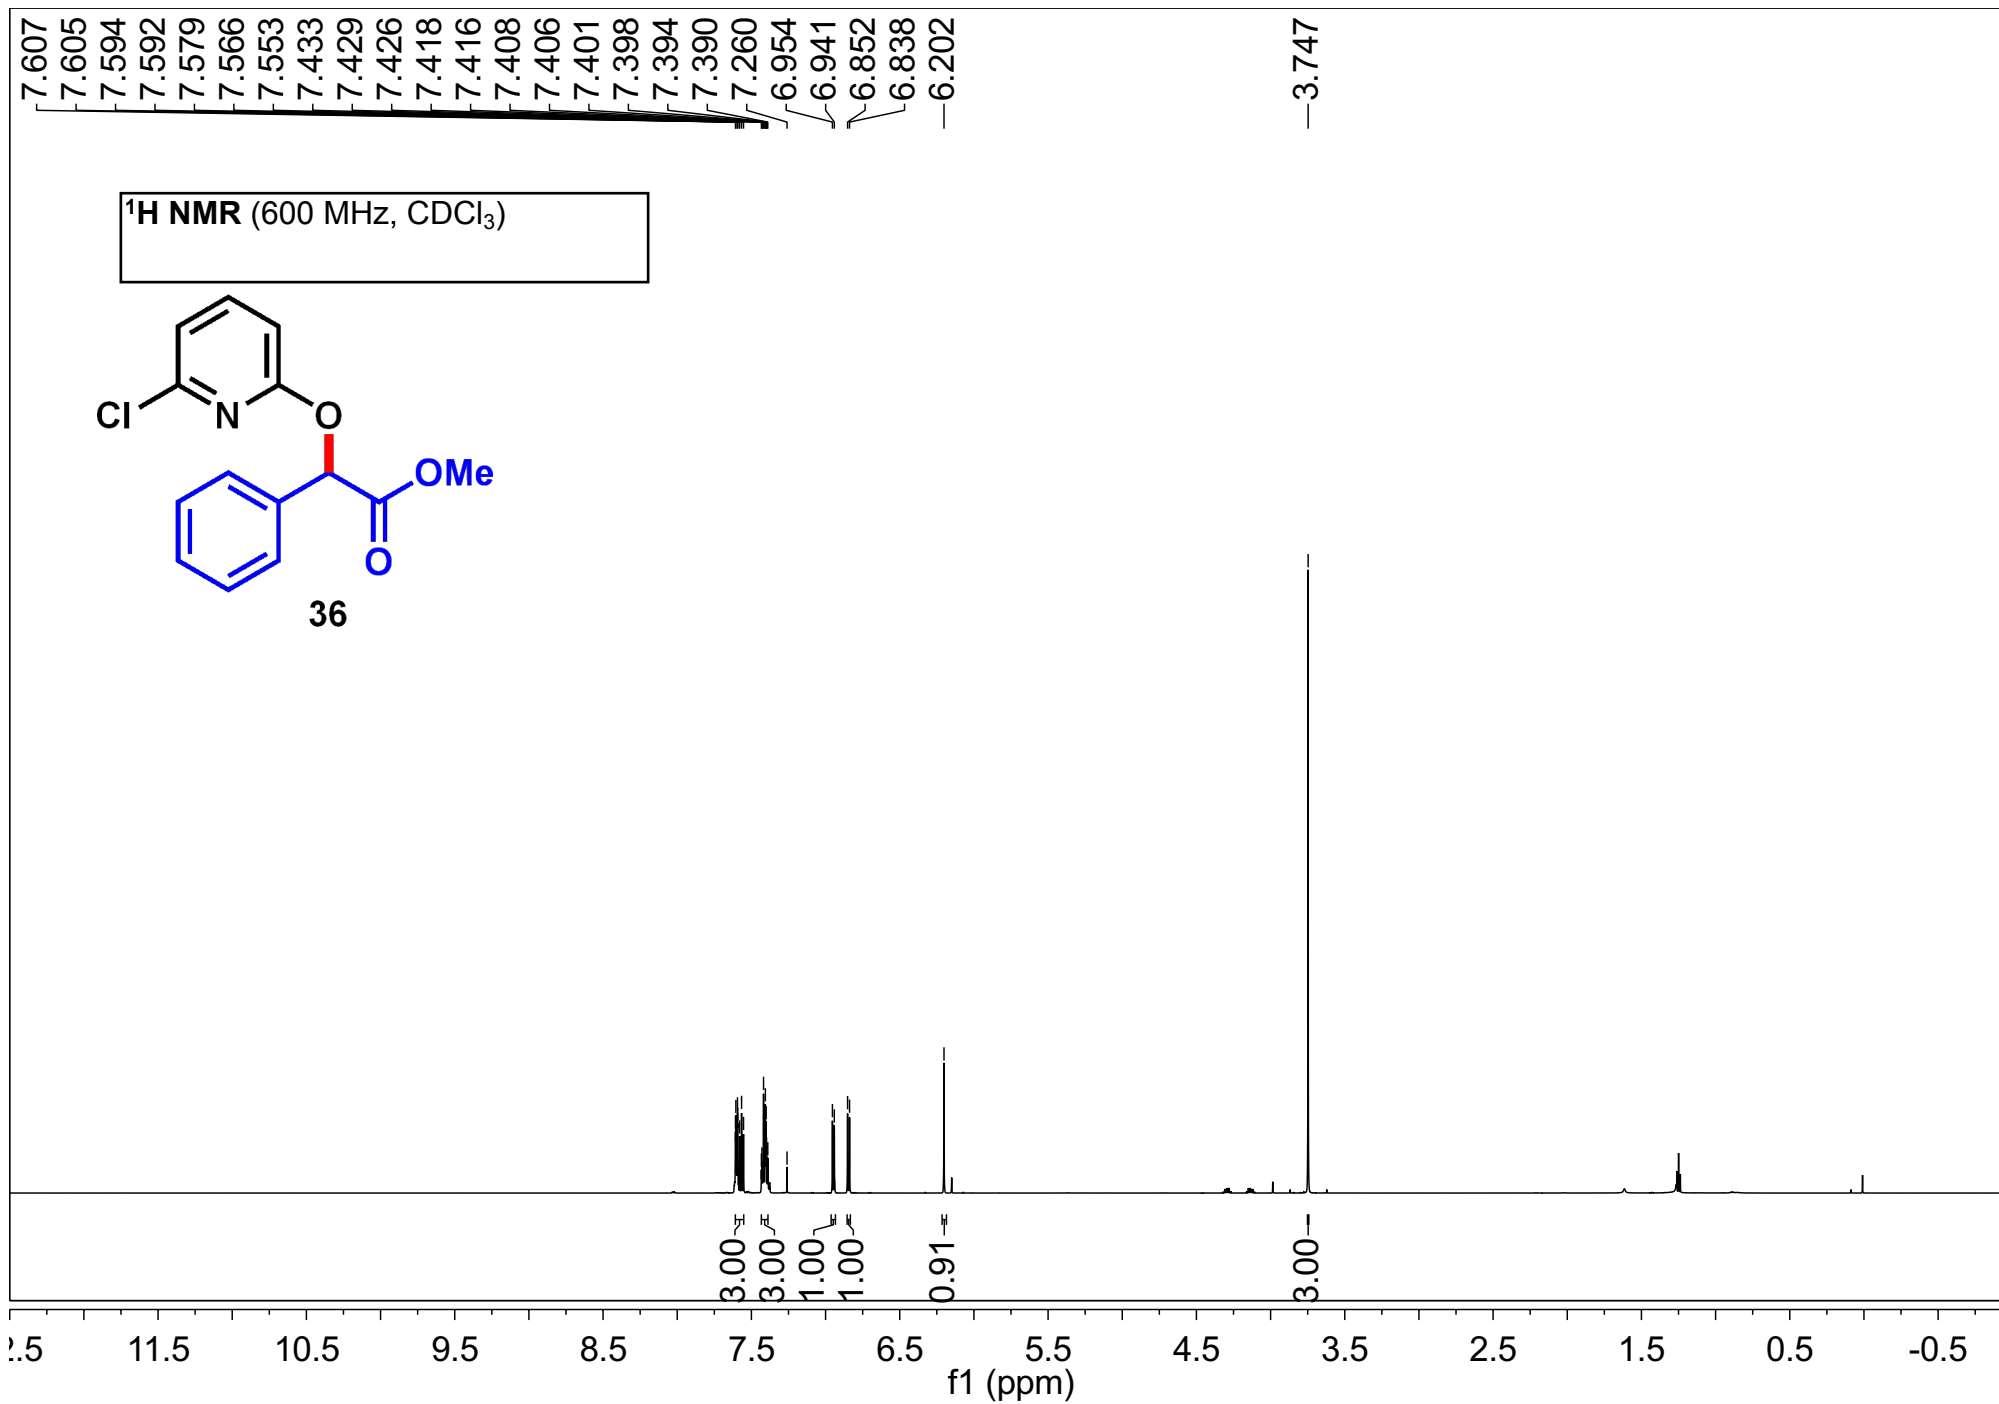

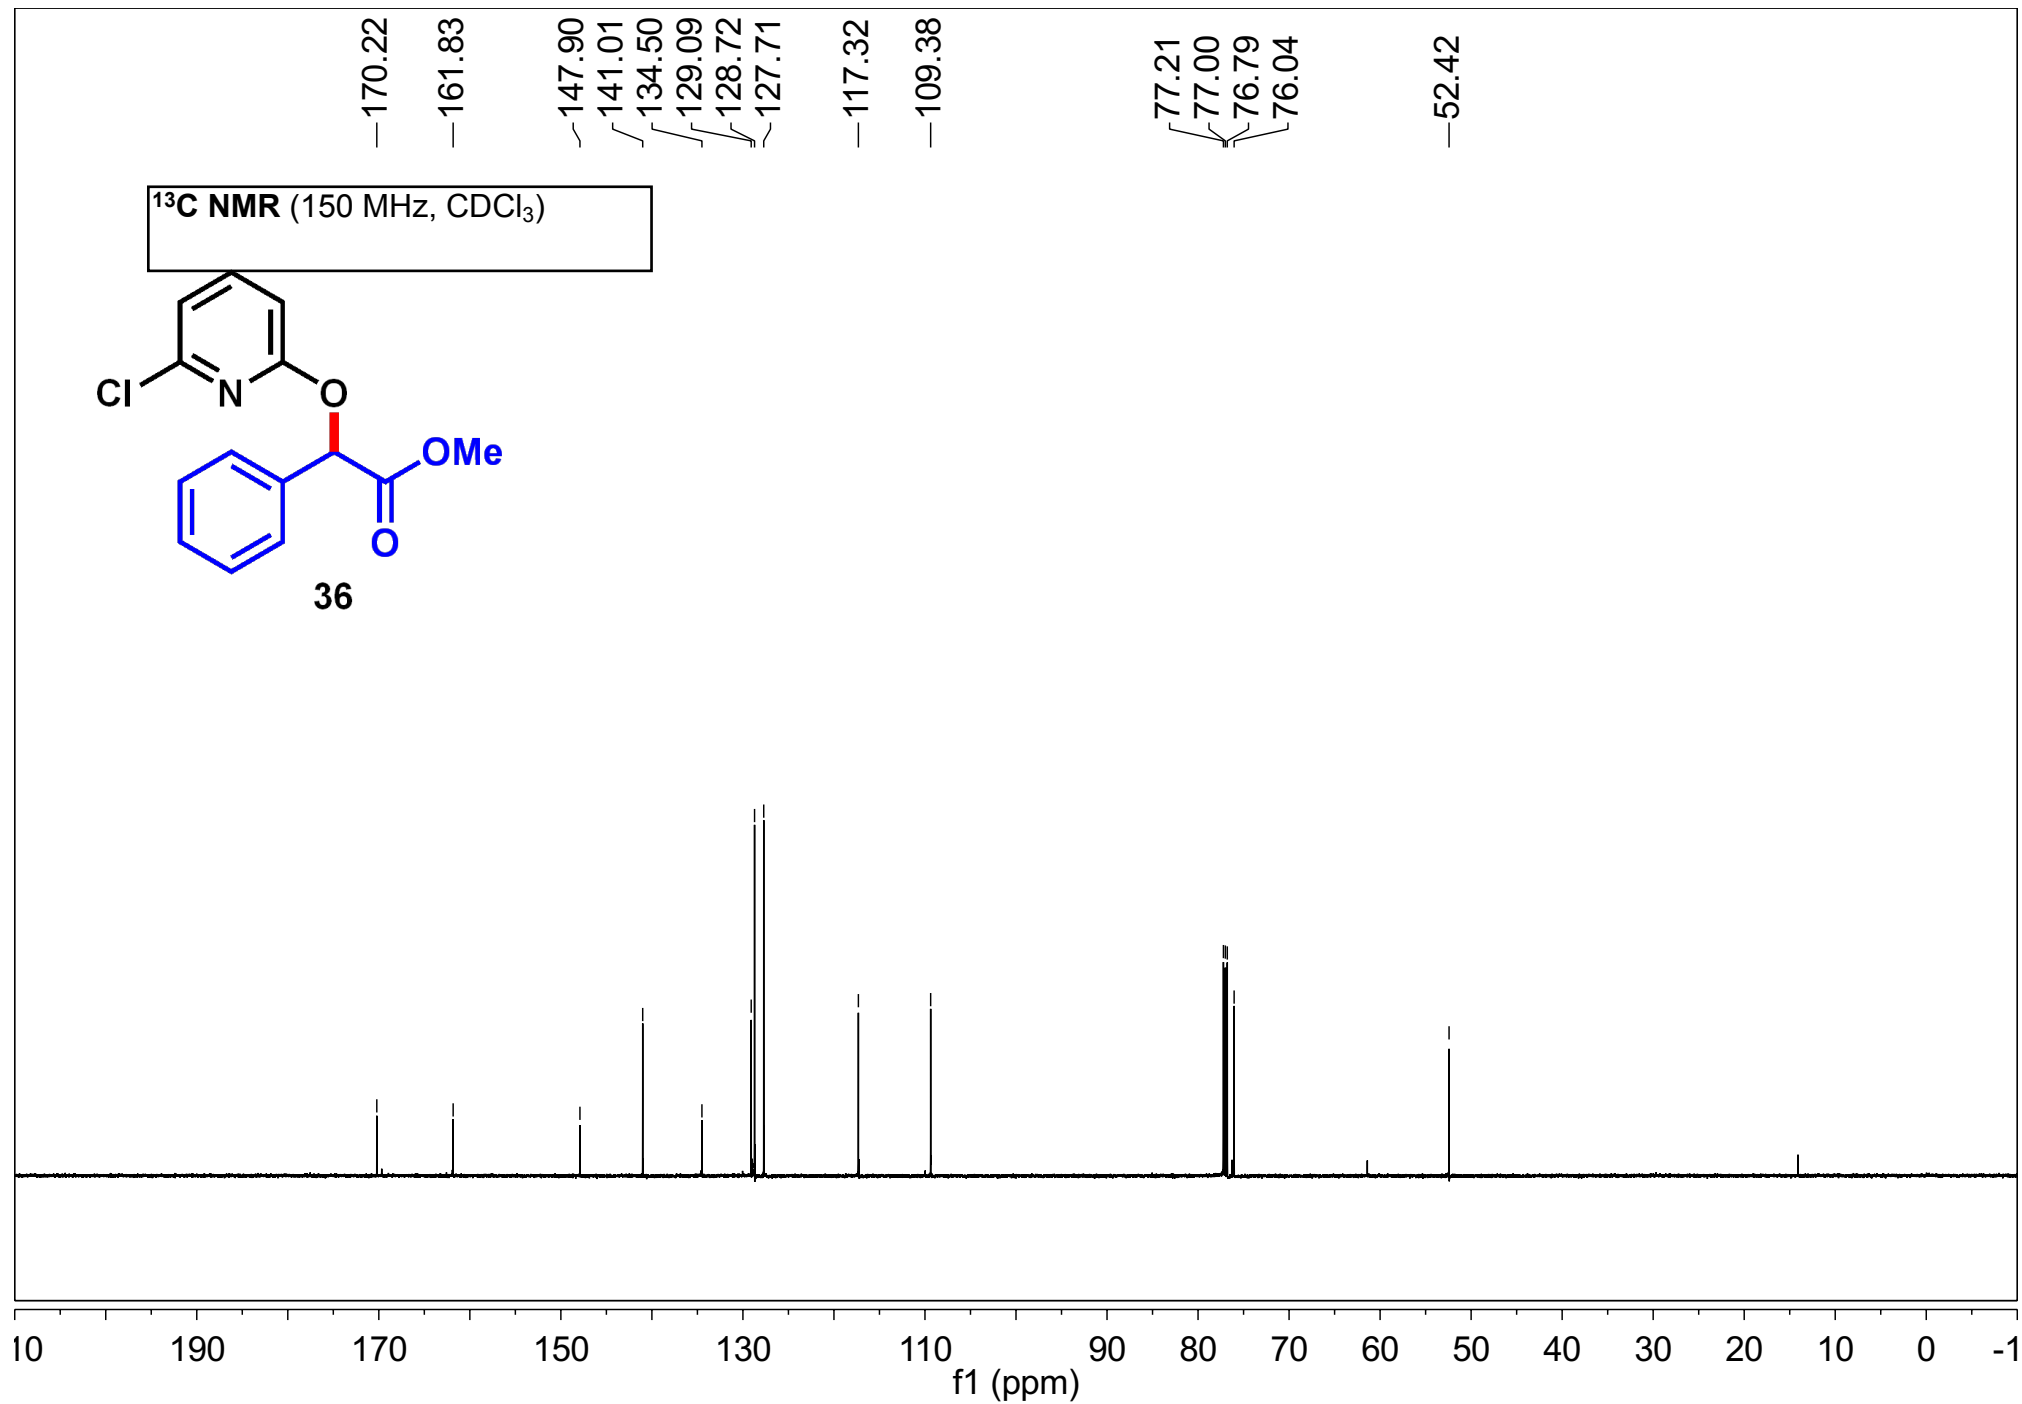

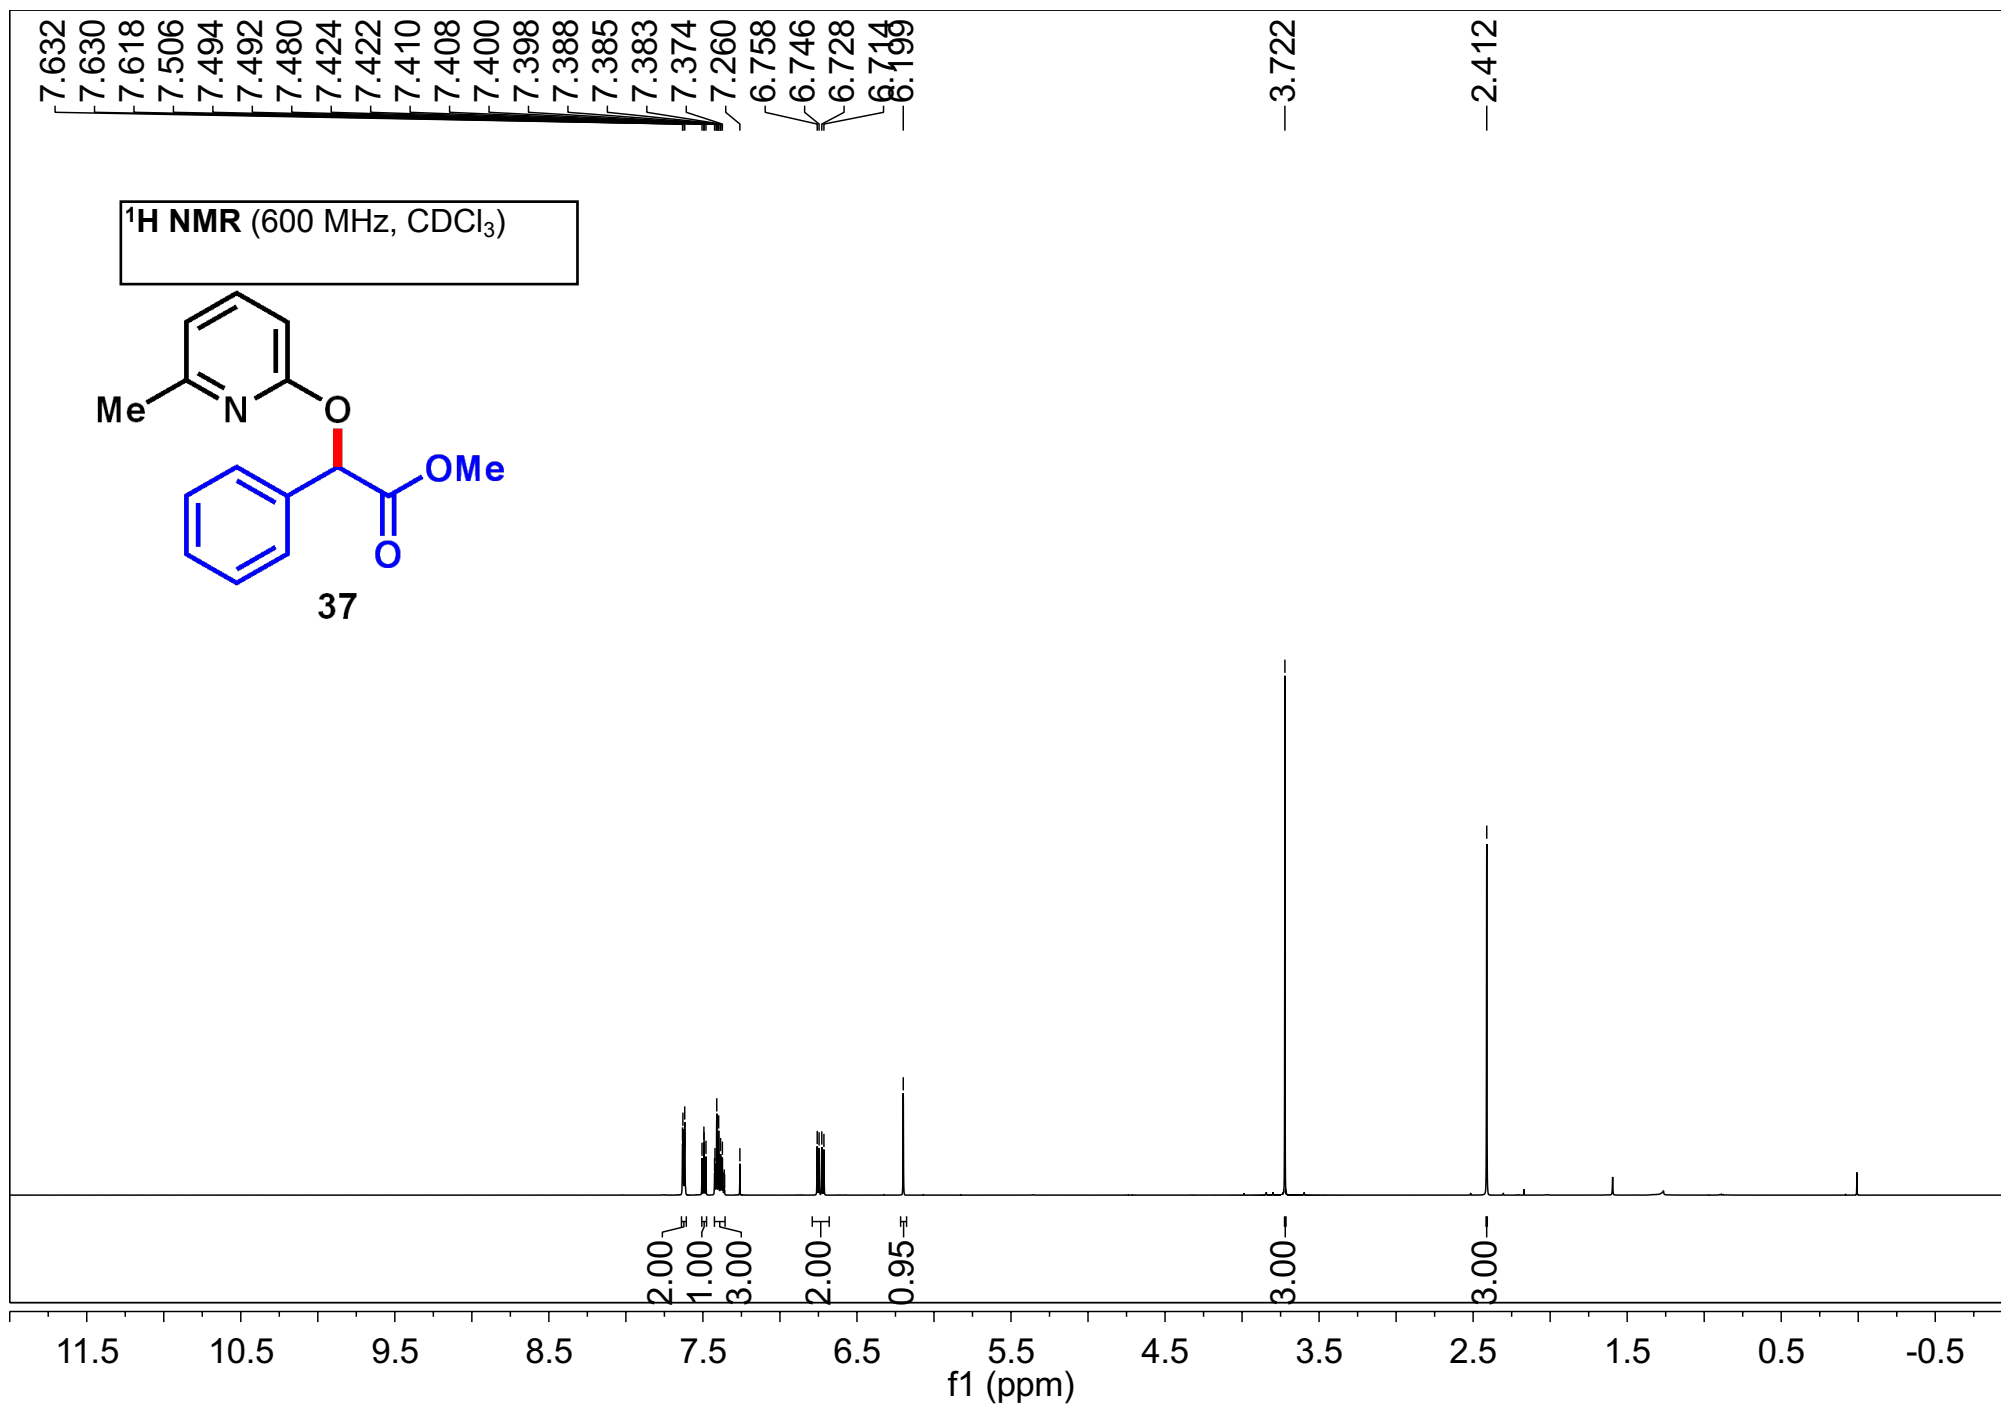



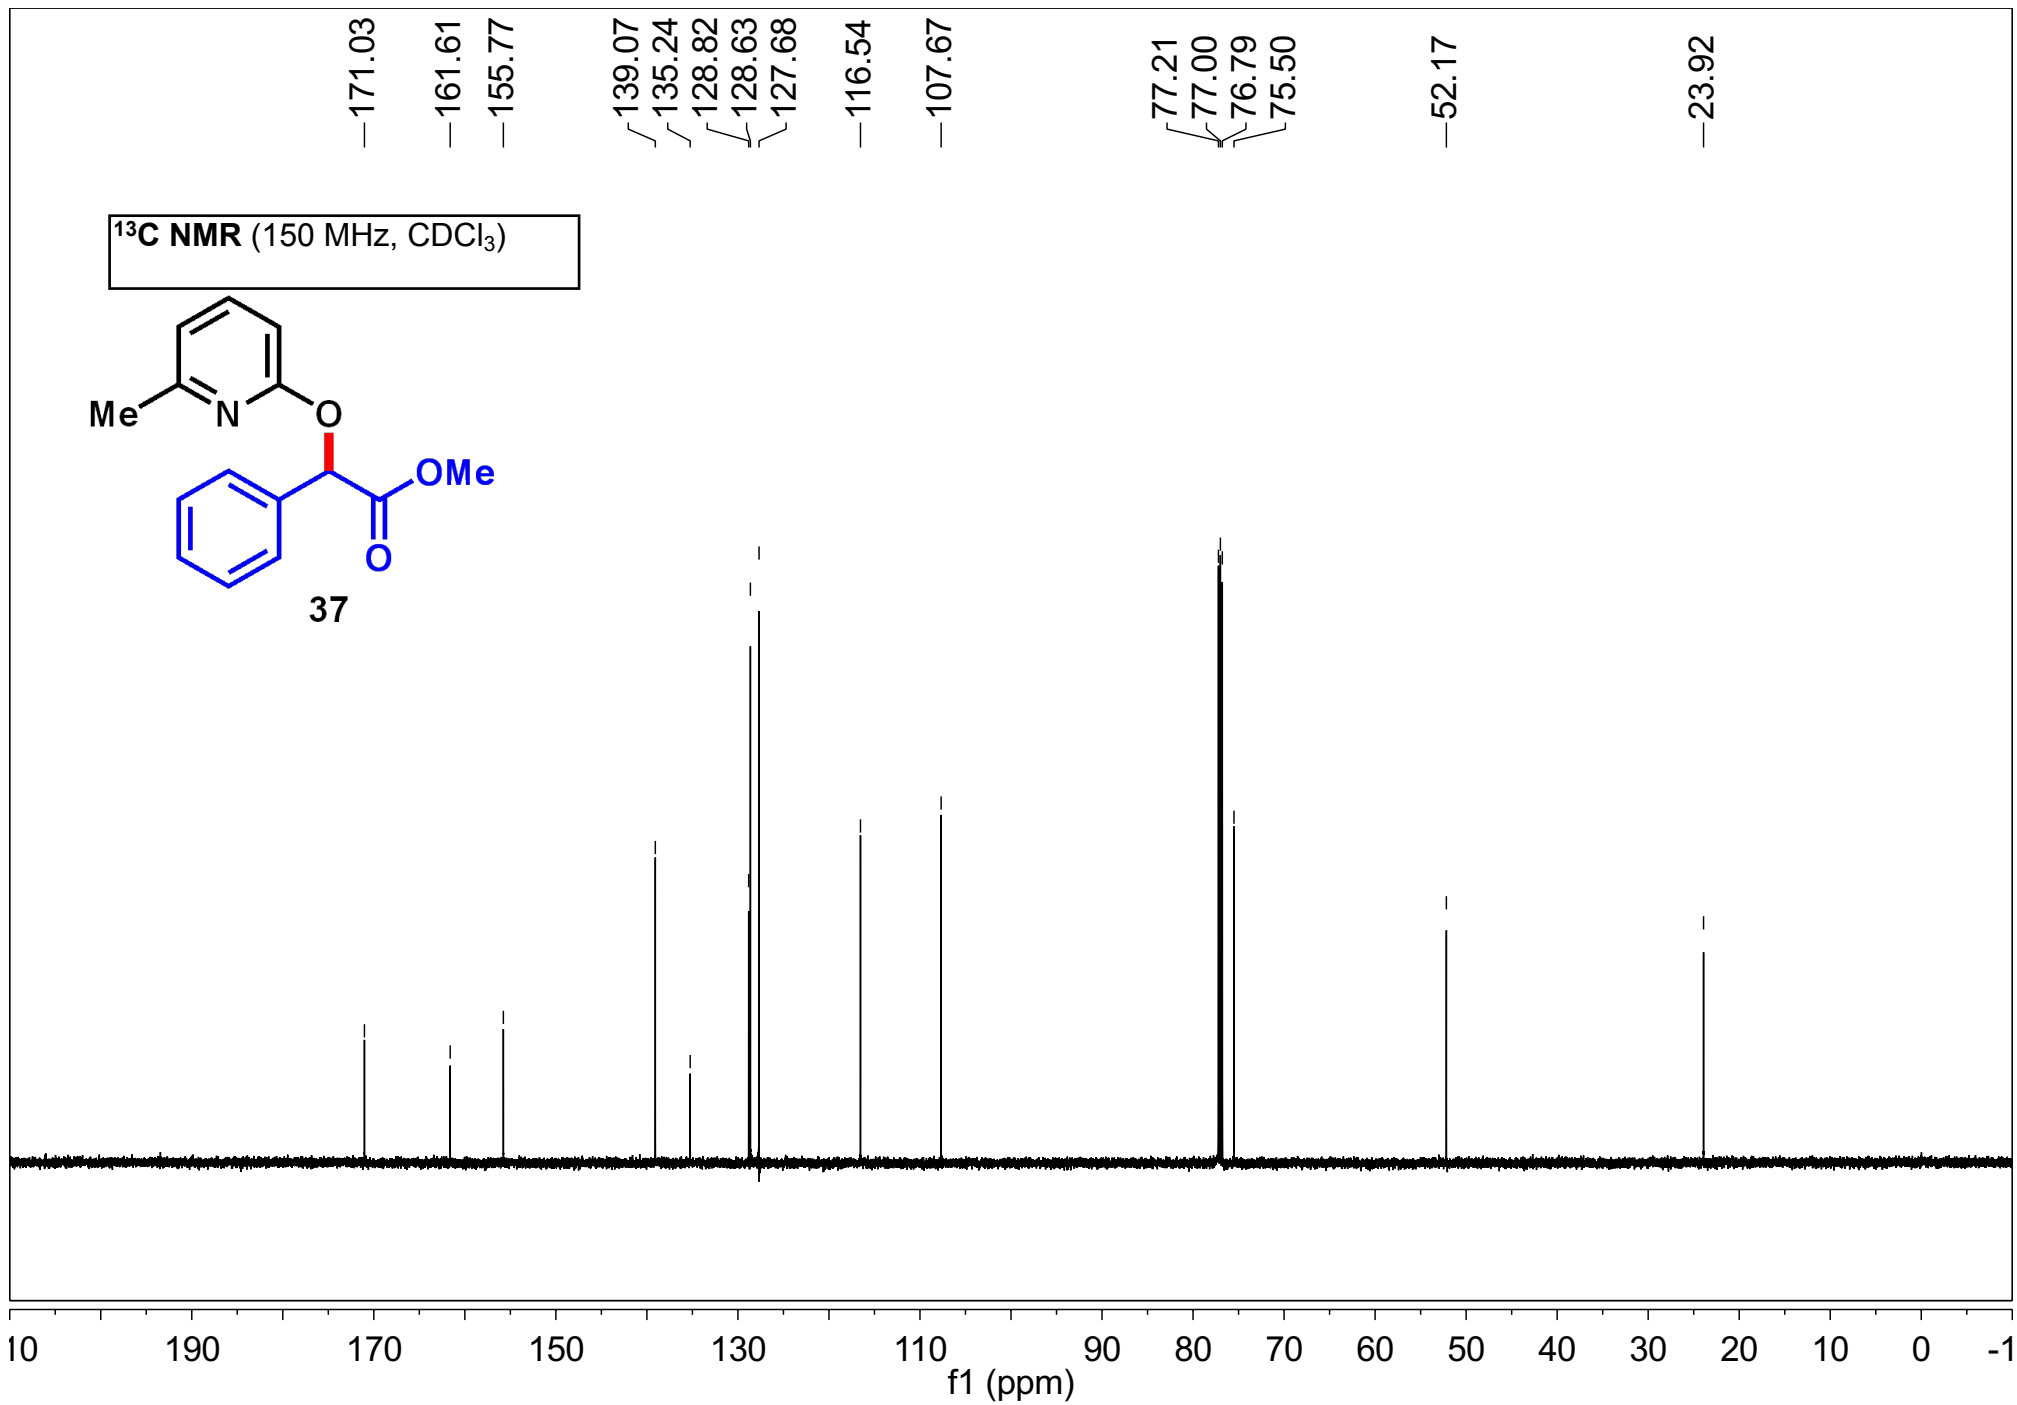

<sup>1</sup>H NMR (600 MHz, CDCl<sub>3</sub>)

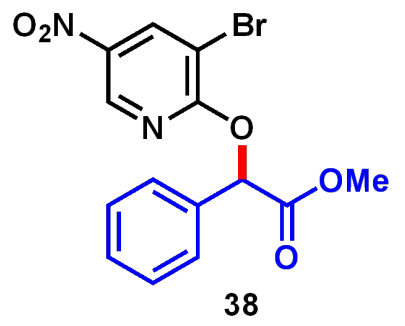

8.979  
8.975  
8.678  
8.674  
7.654  
7.651  
7.640  
7.639  
7.449  
7.437  
7.433  
7.430  
6.269  
3.729

1.00  
1.00  
2.00  
3.00  
1.00  
3.00

9.5 9.0 8.5 8.0 7.5 7.0 6.5 6.0 5.5 5.0 4.5 4.0 3.5 3.0 2.5 2.0 1.5 1.0 0.5 0.0  
f1 (ppm)

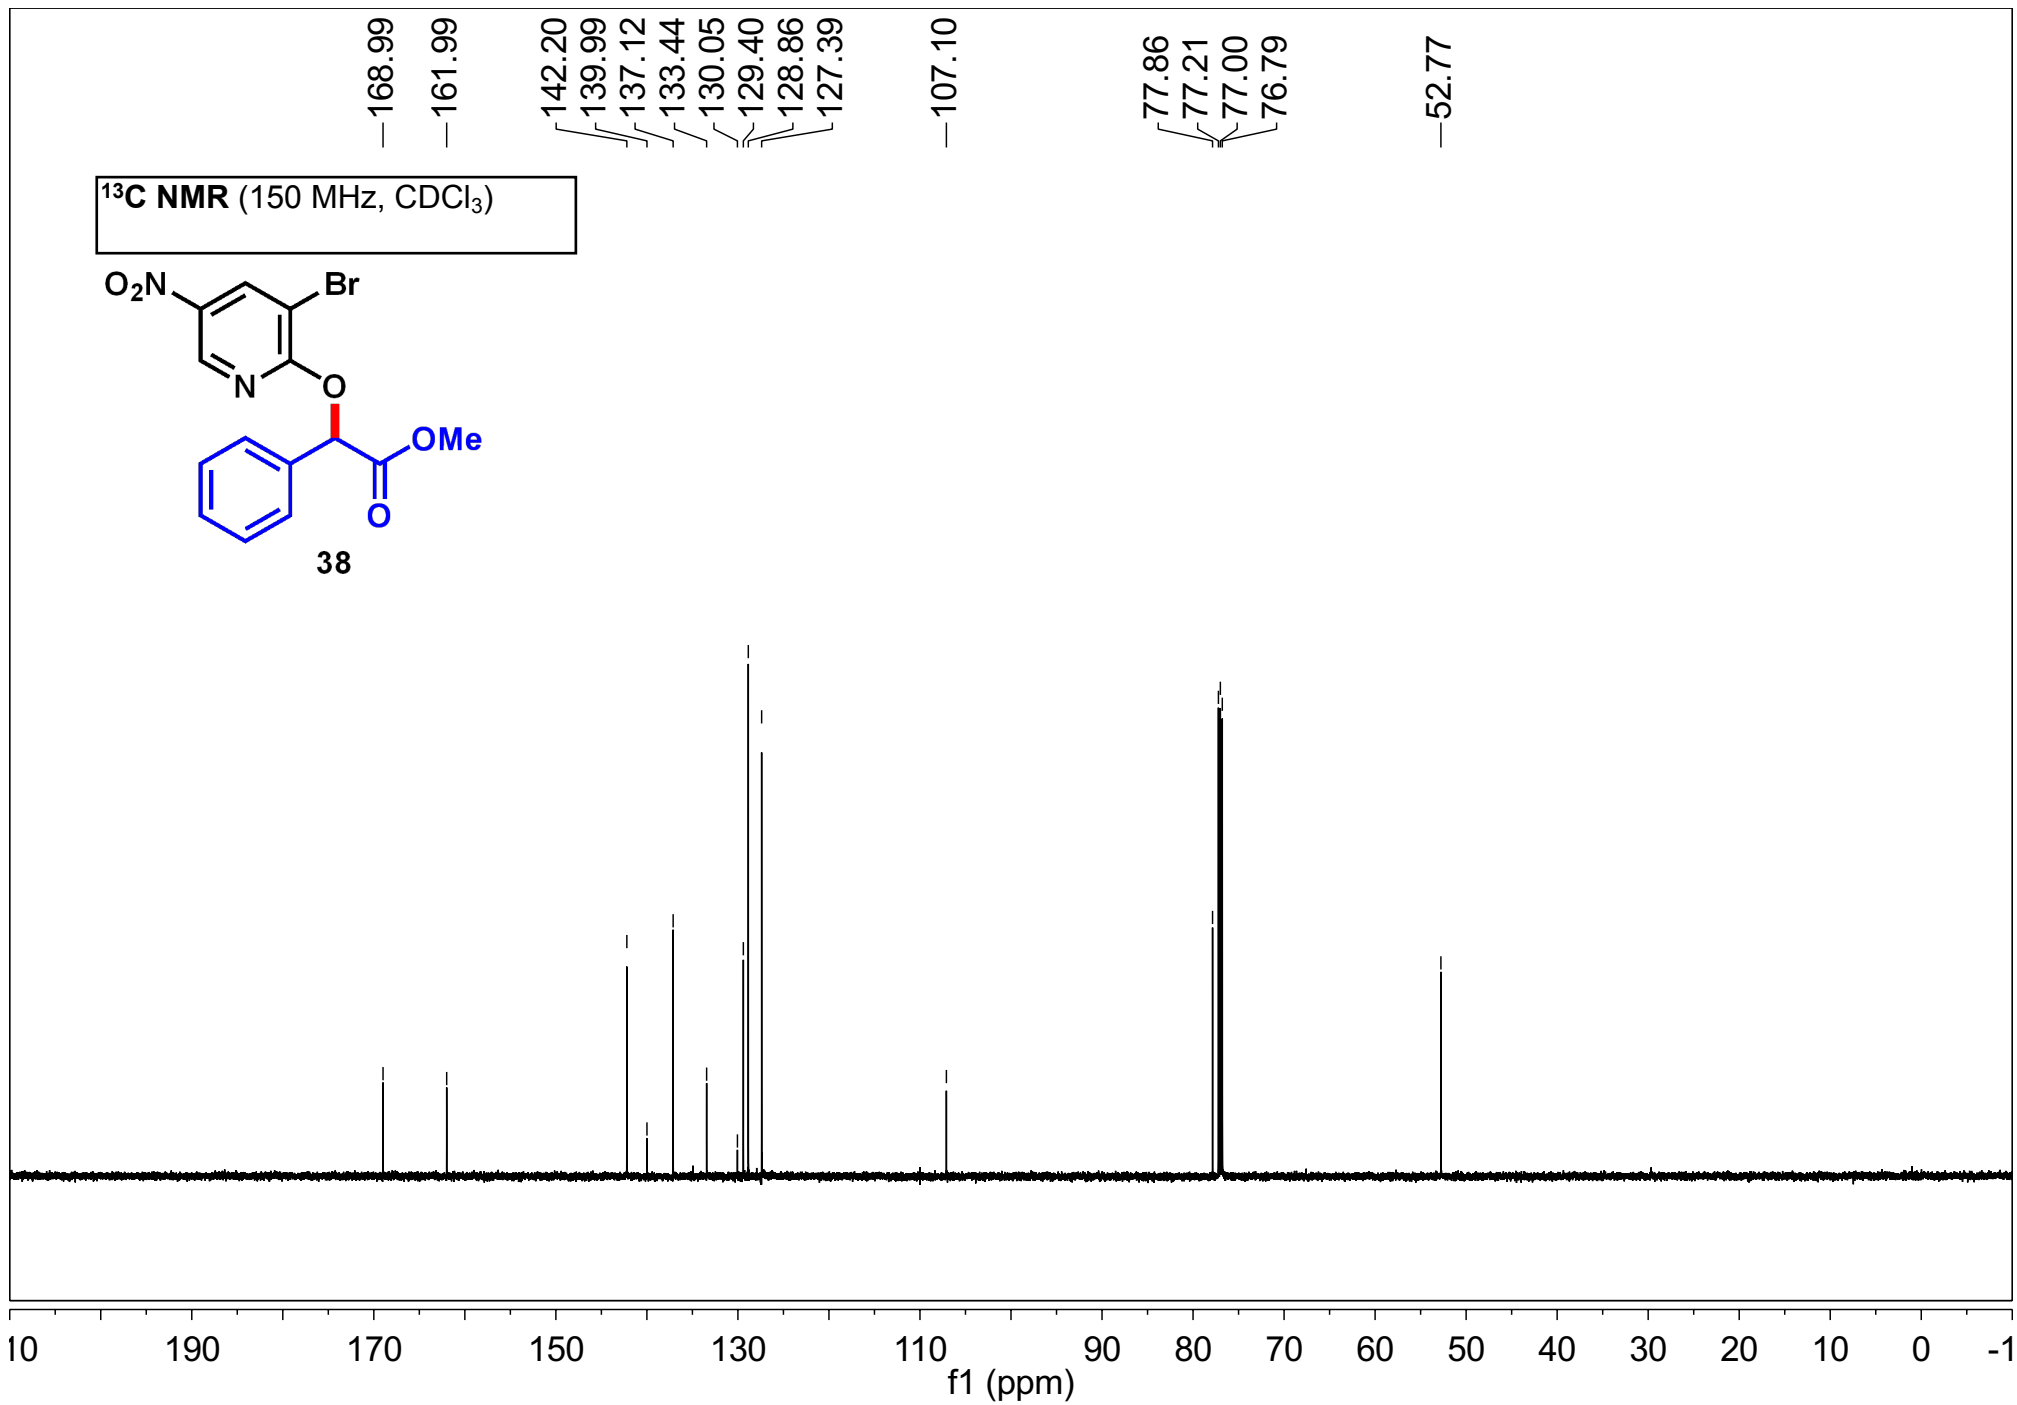

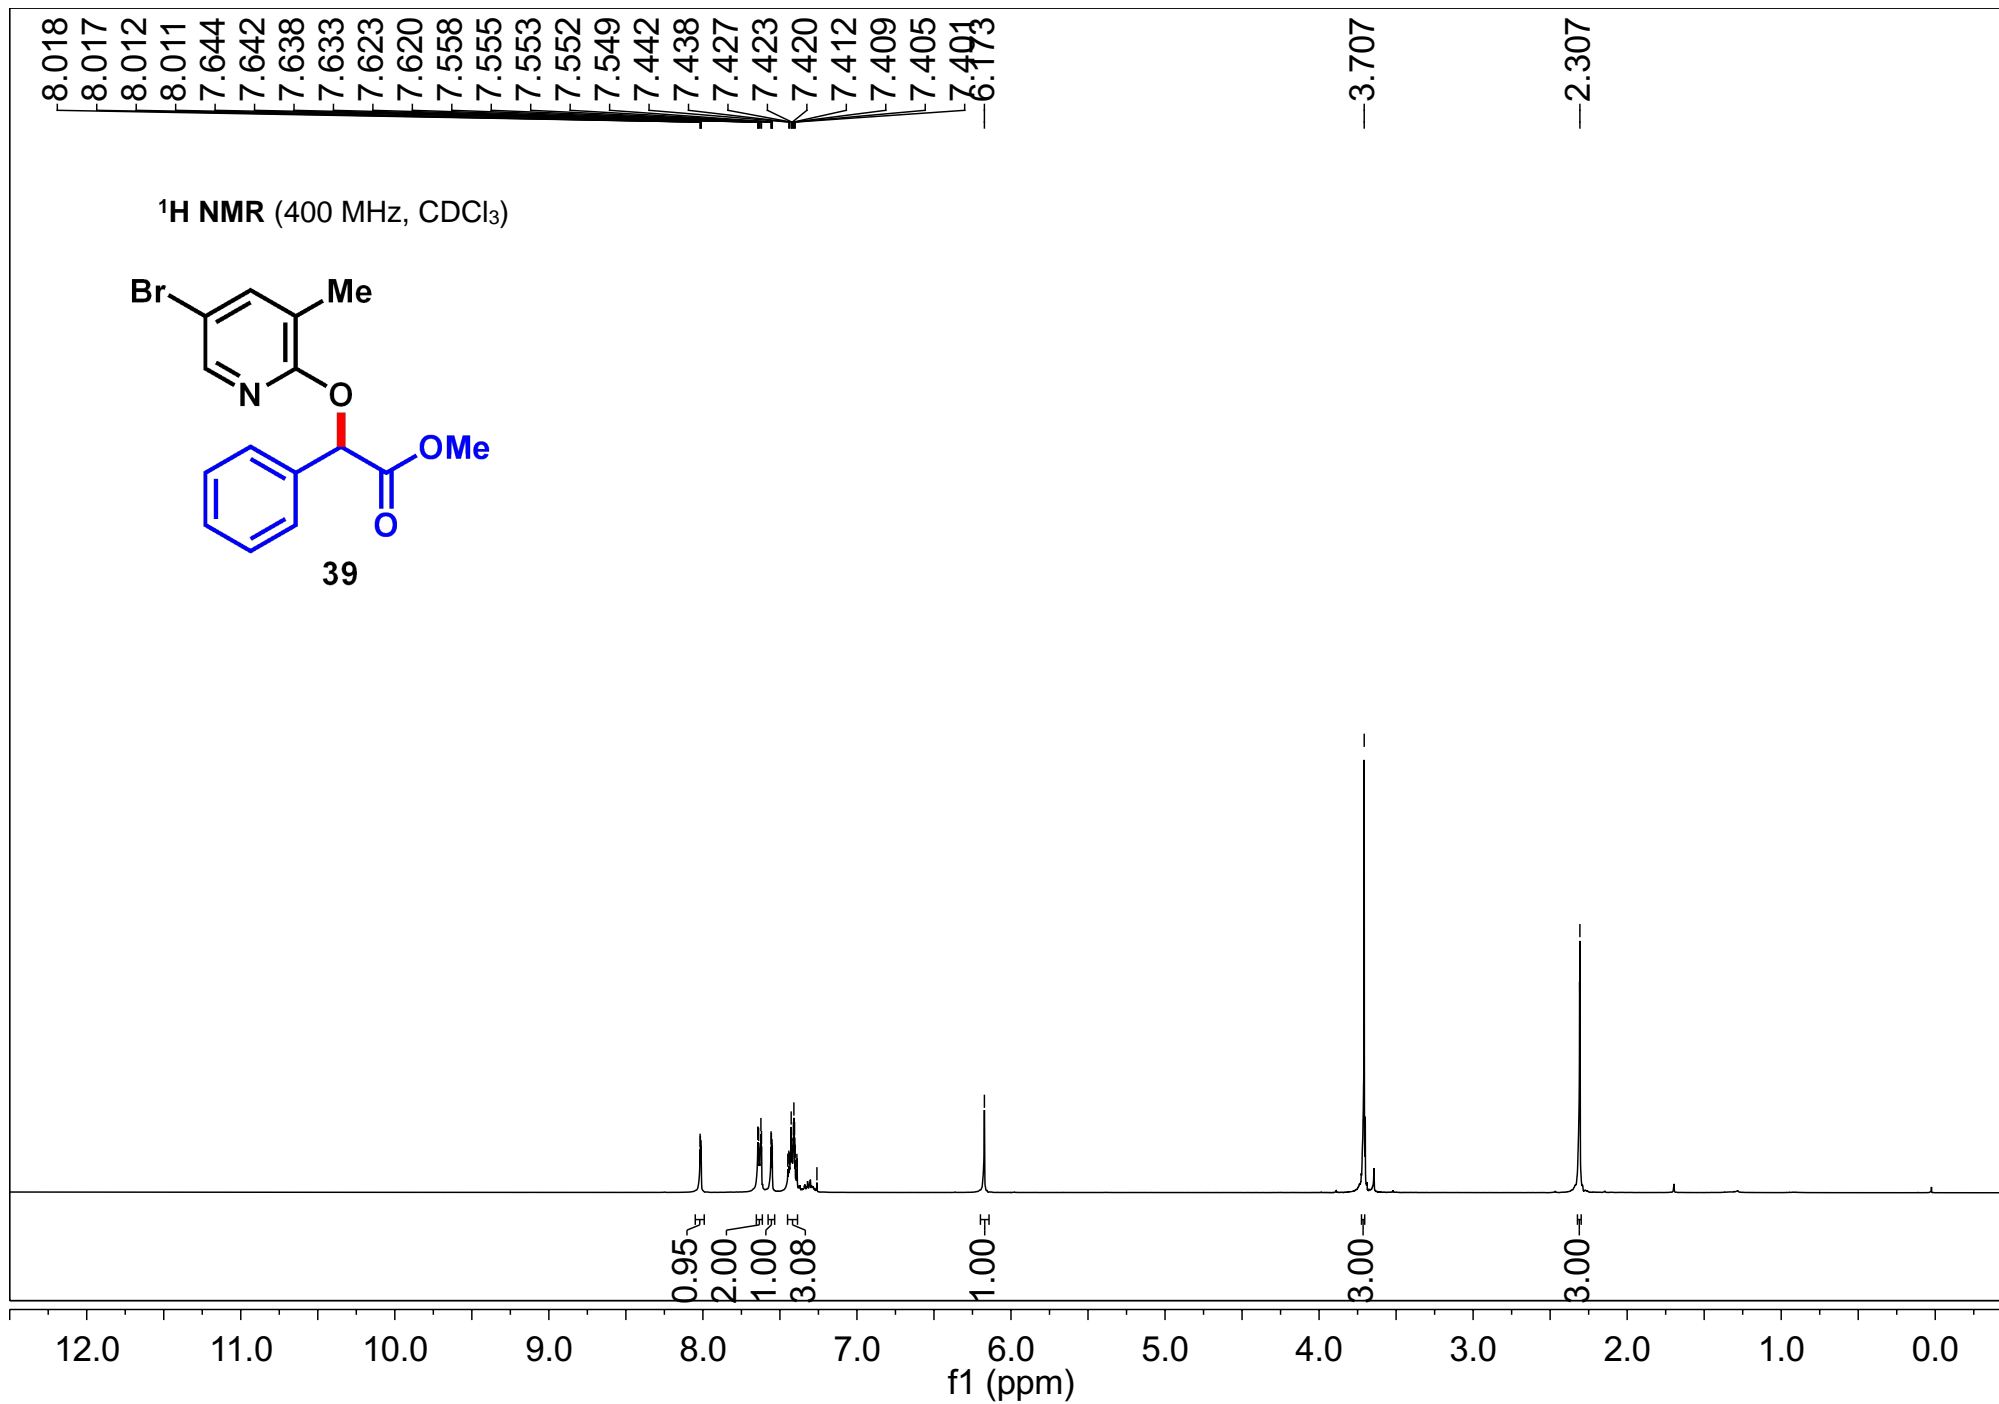

<sup>13</sup>C NMR (150 MHz, CDCl<sub>3</sub>)

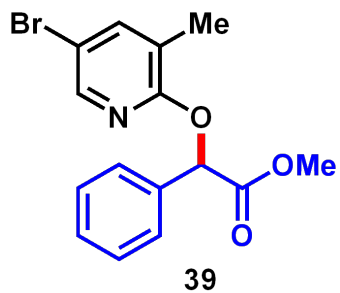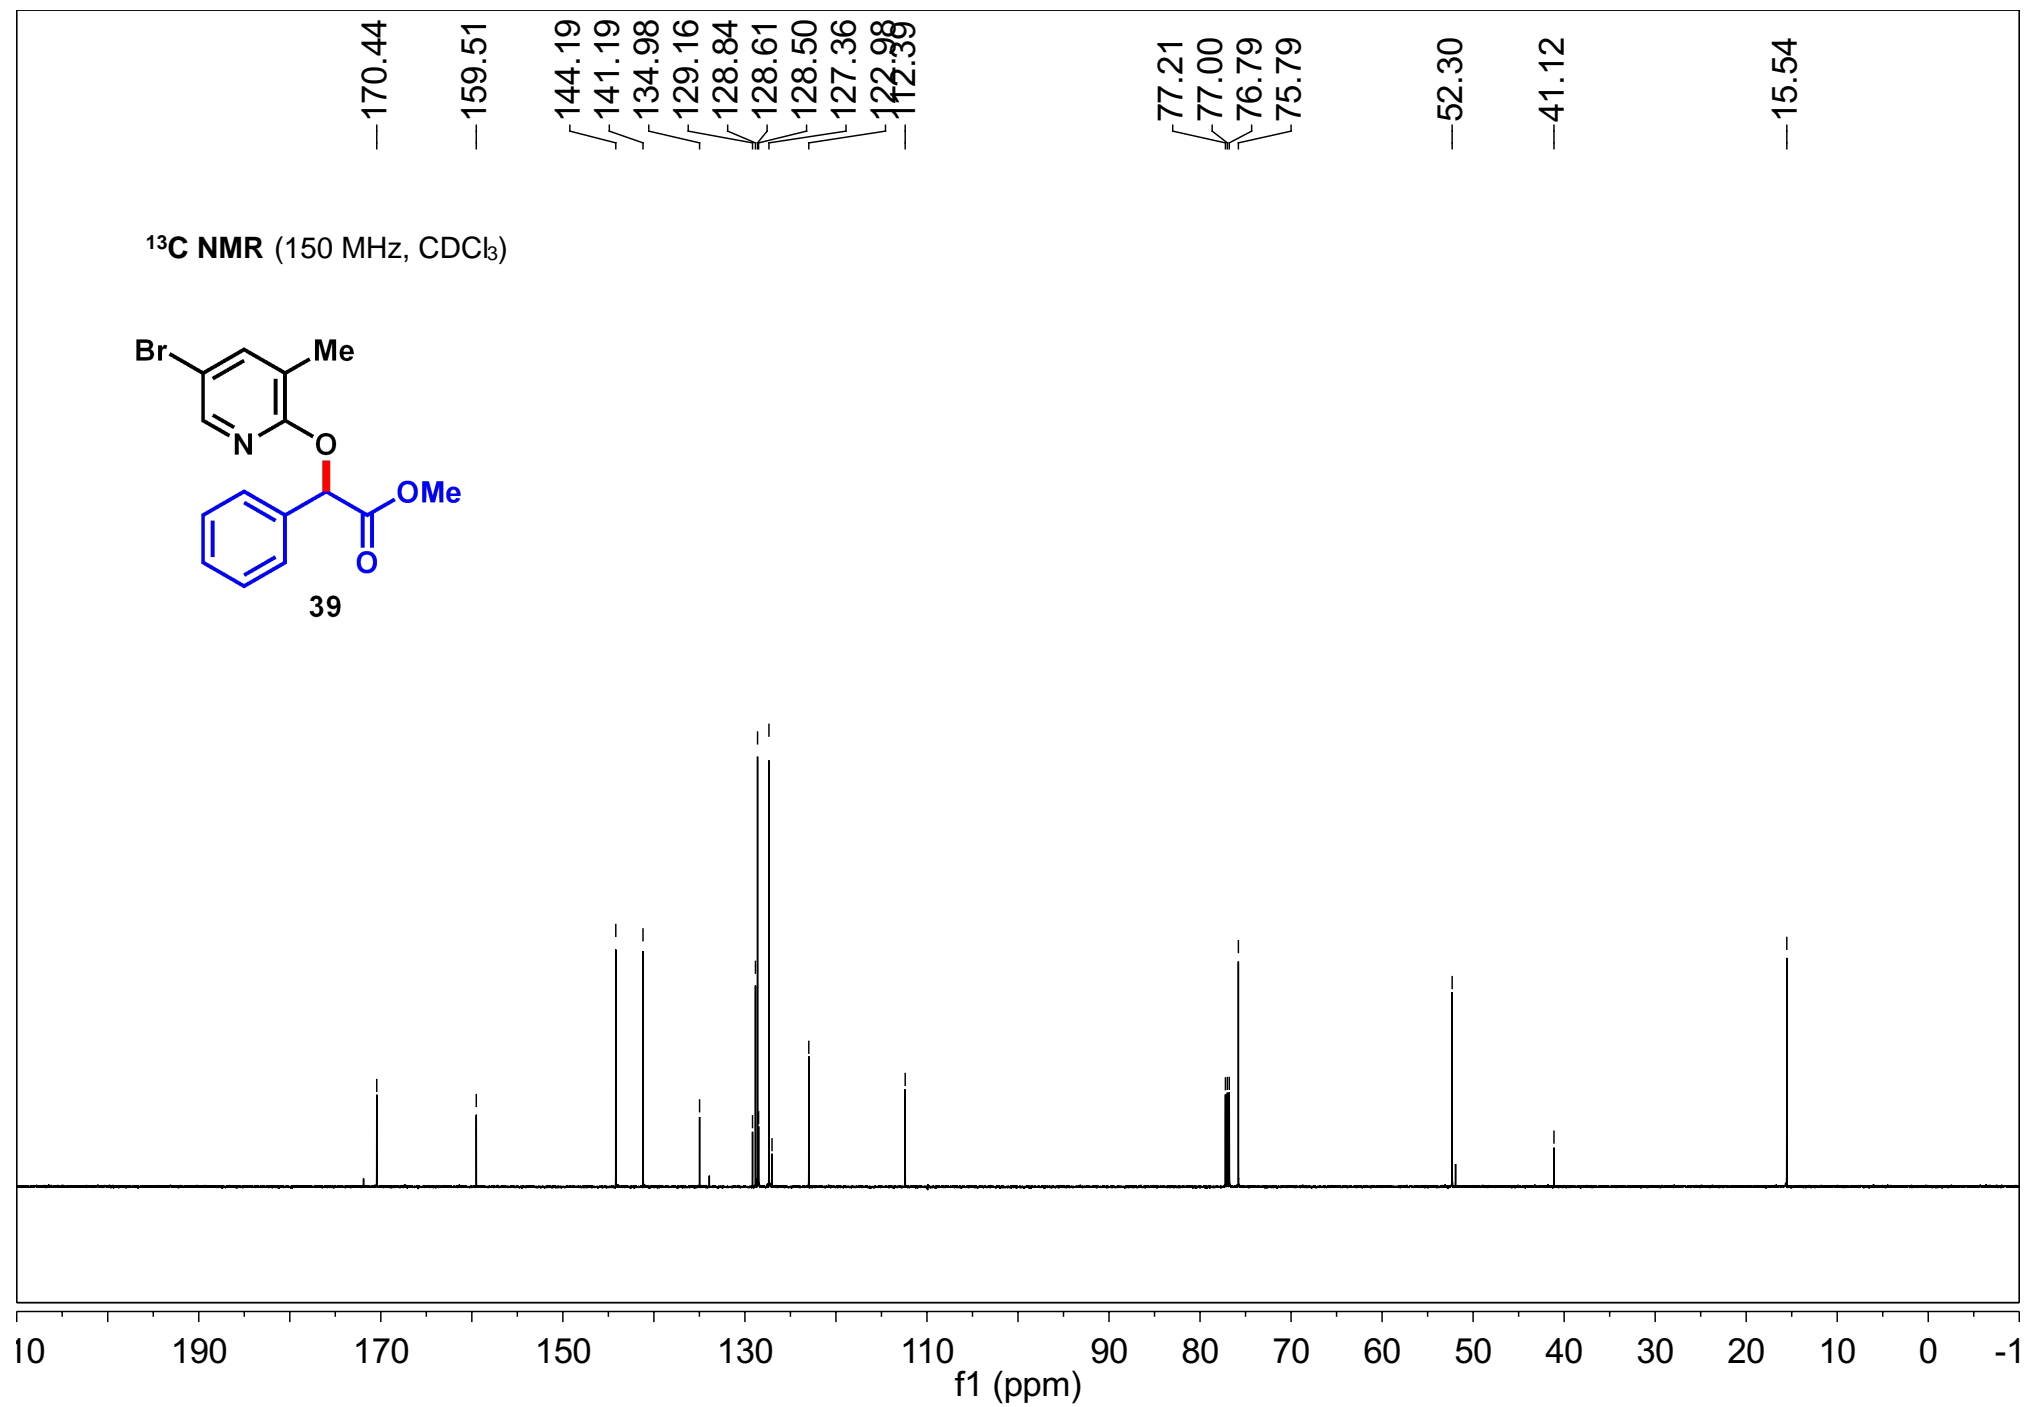

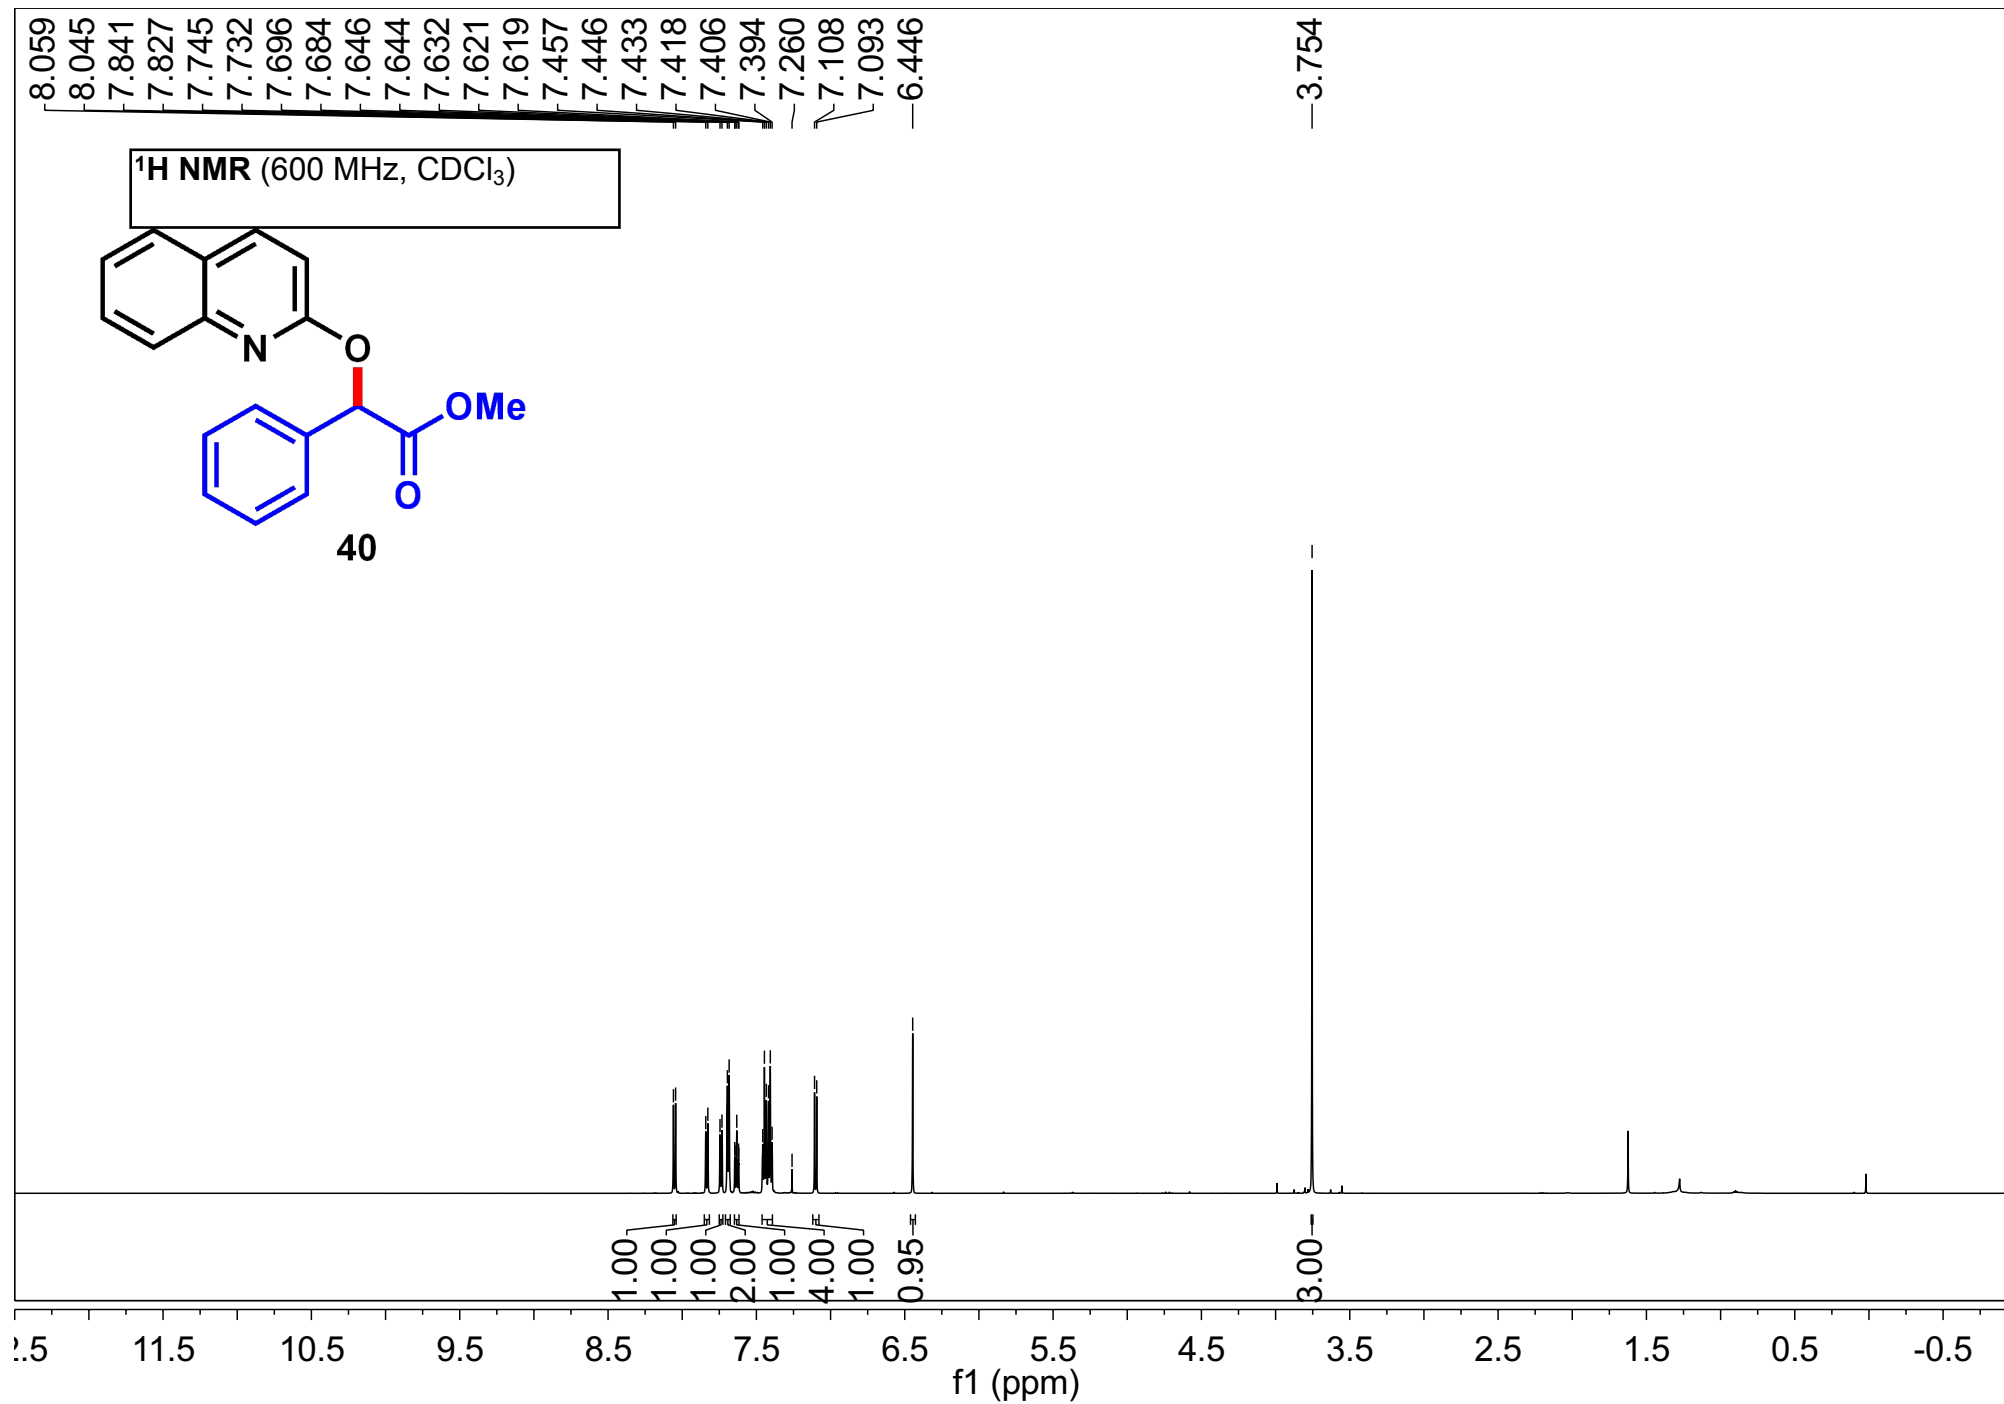

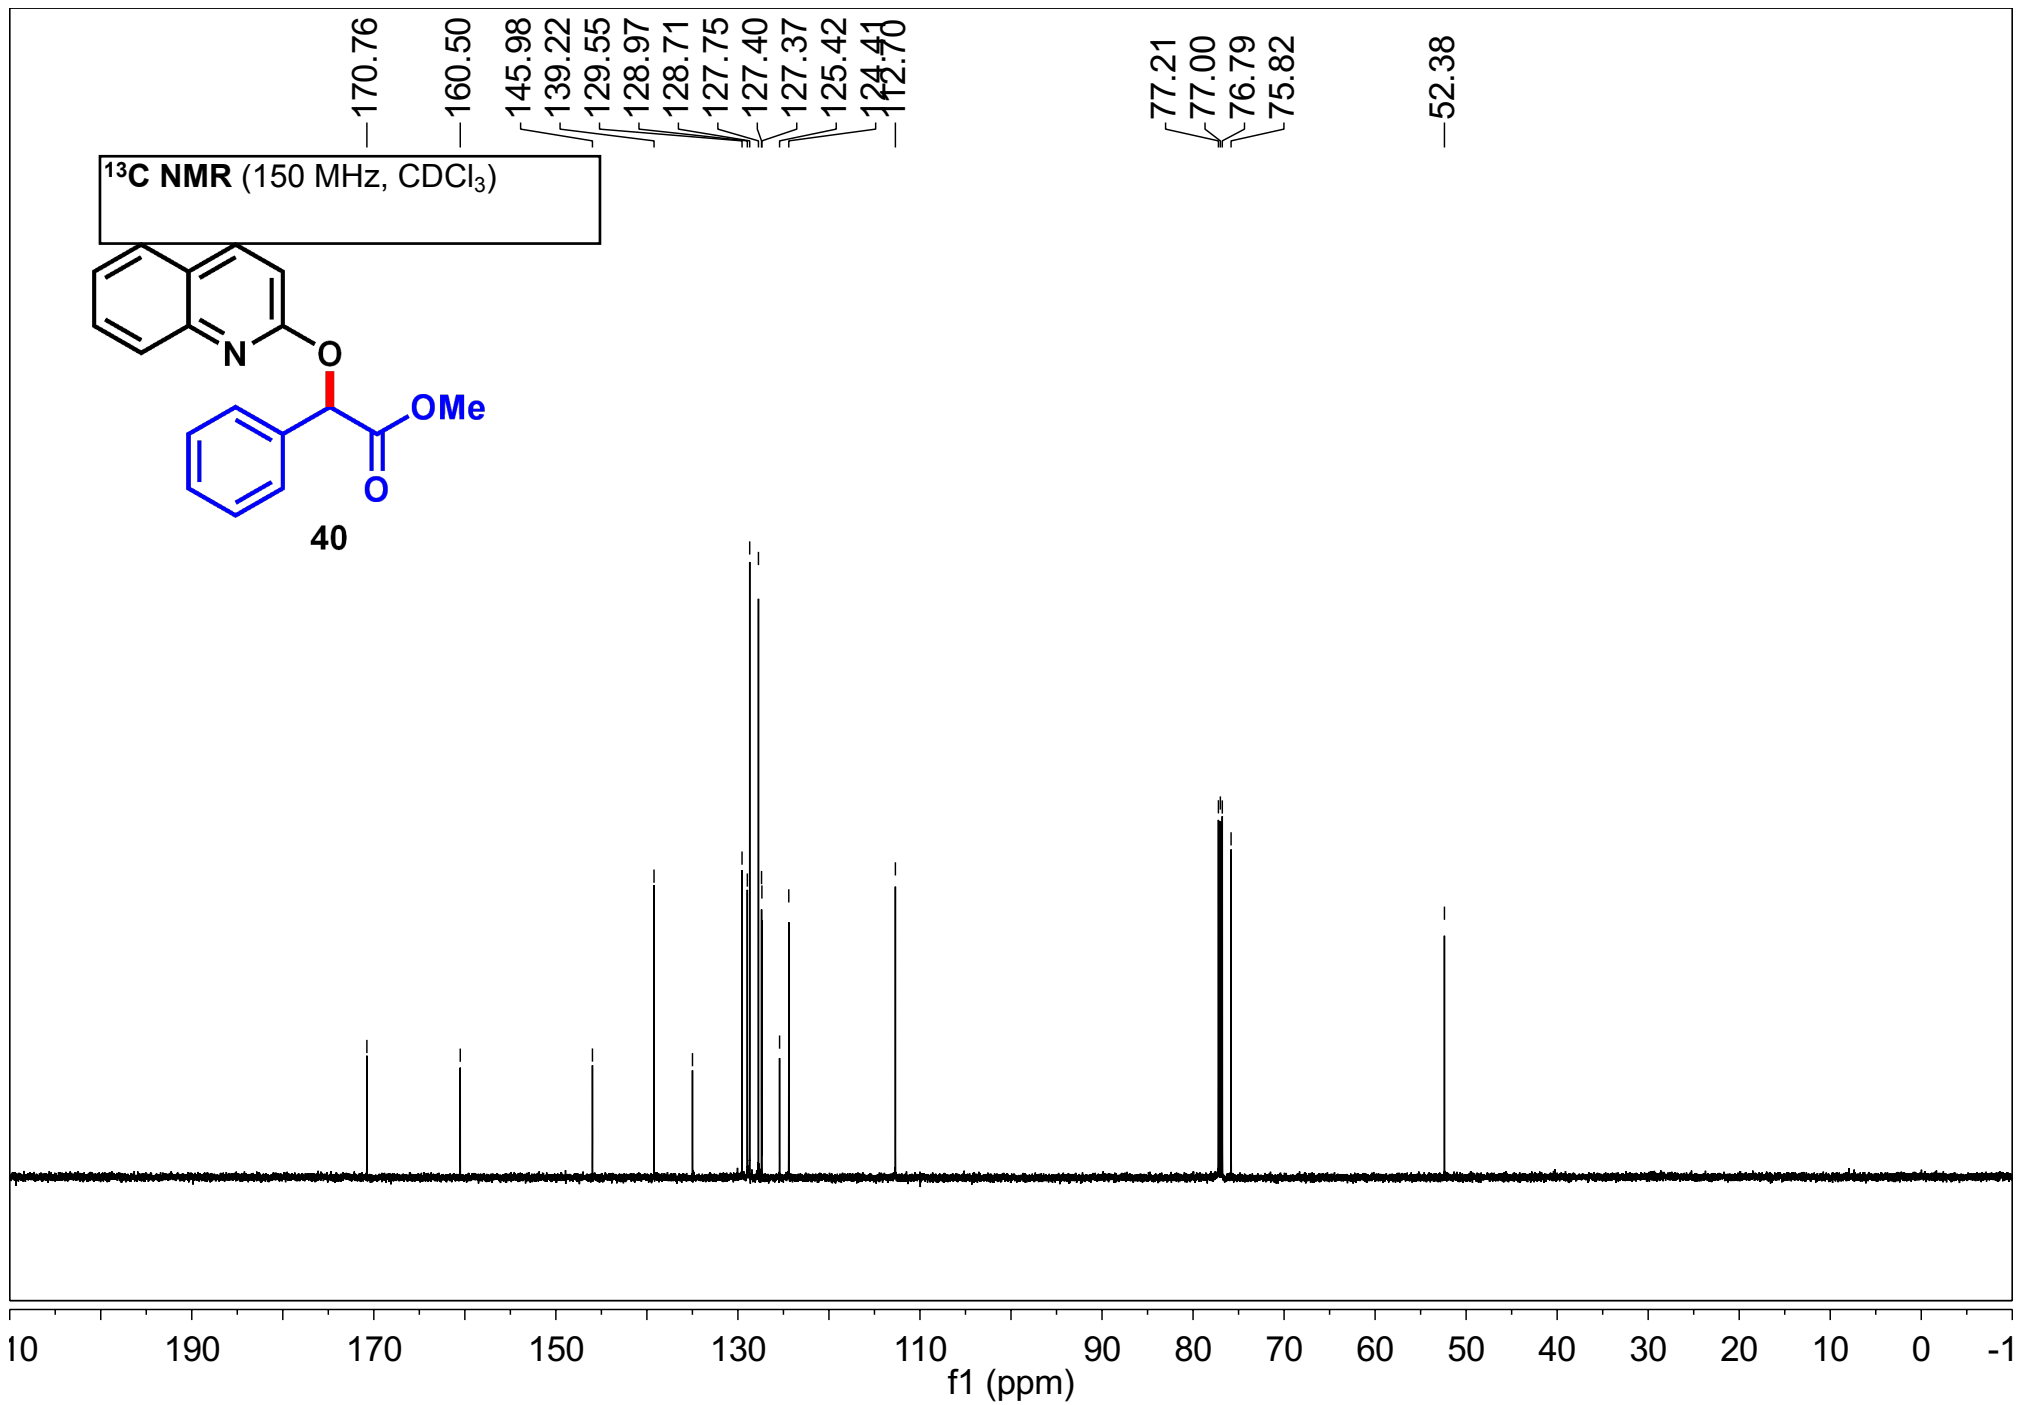

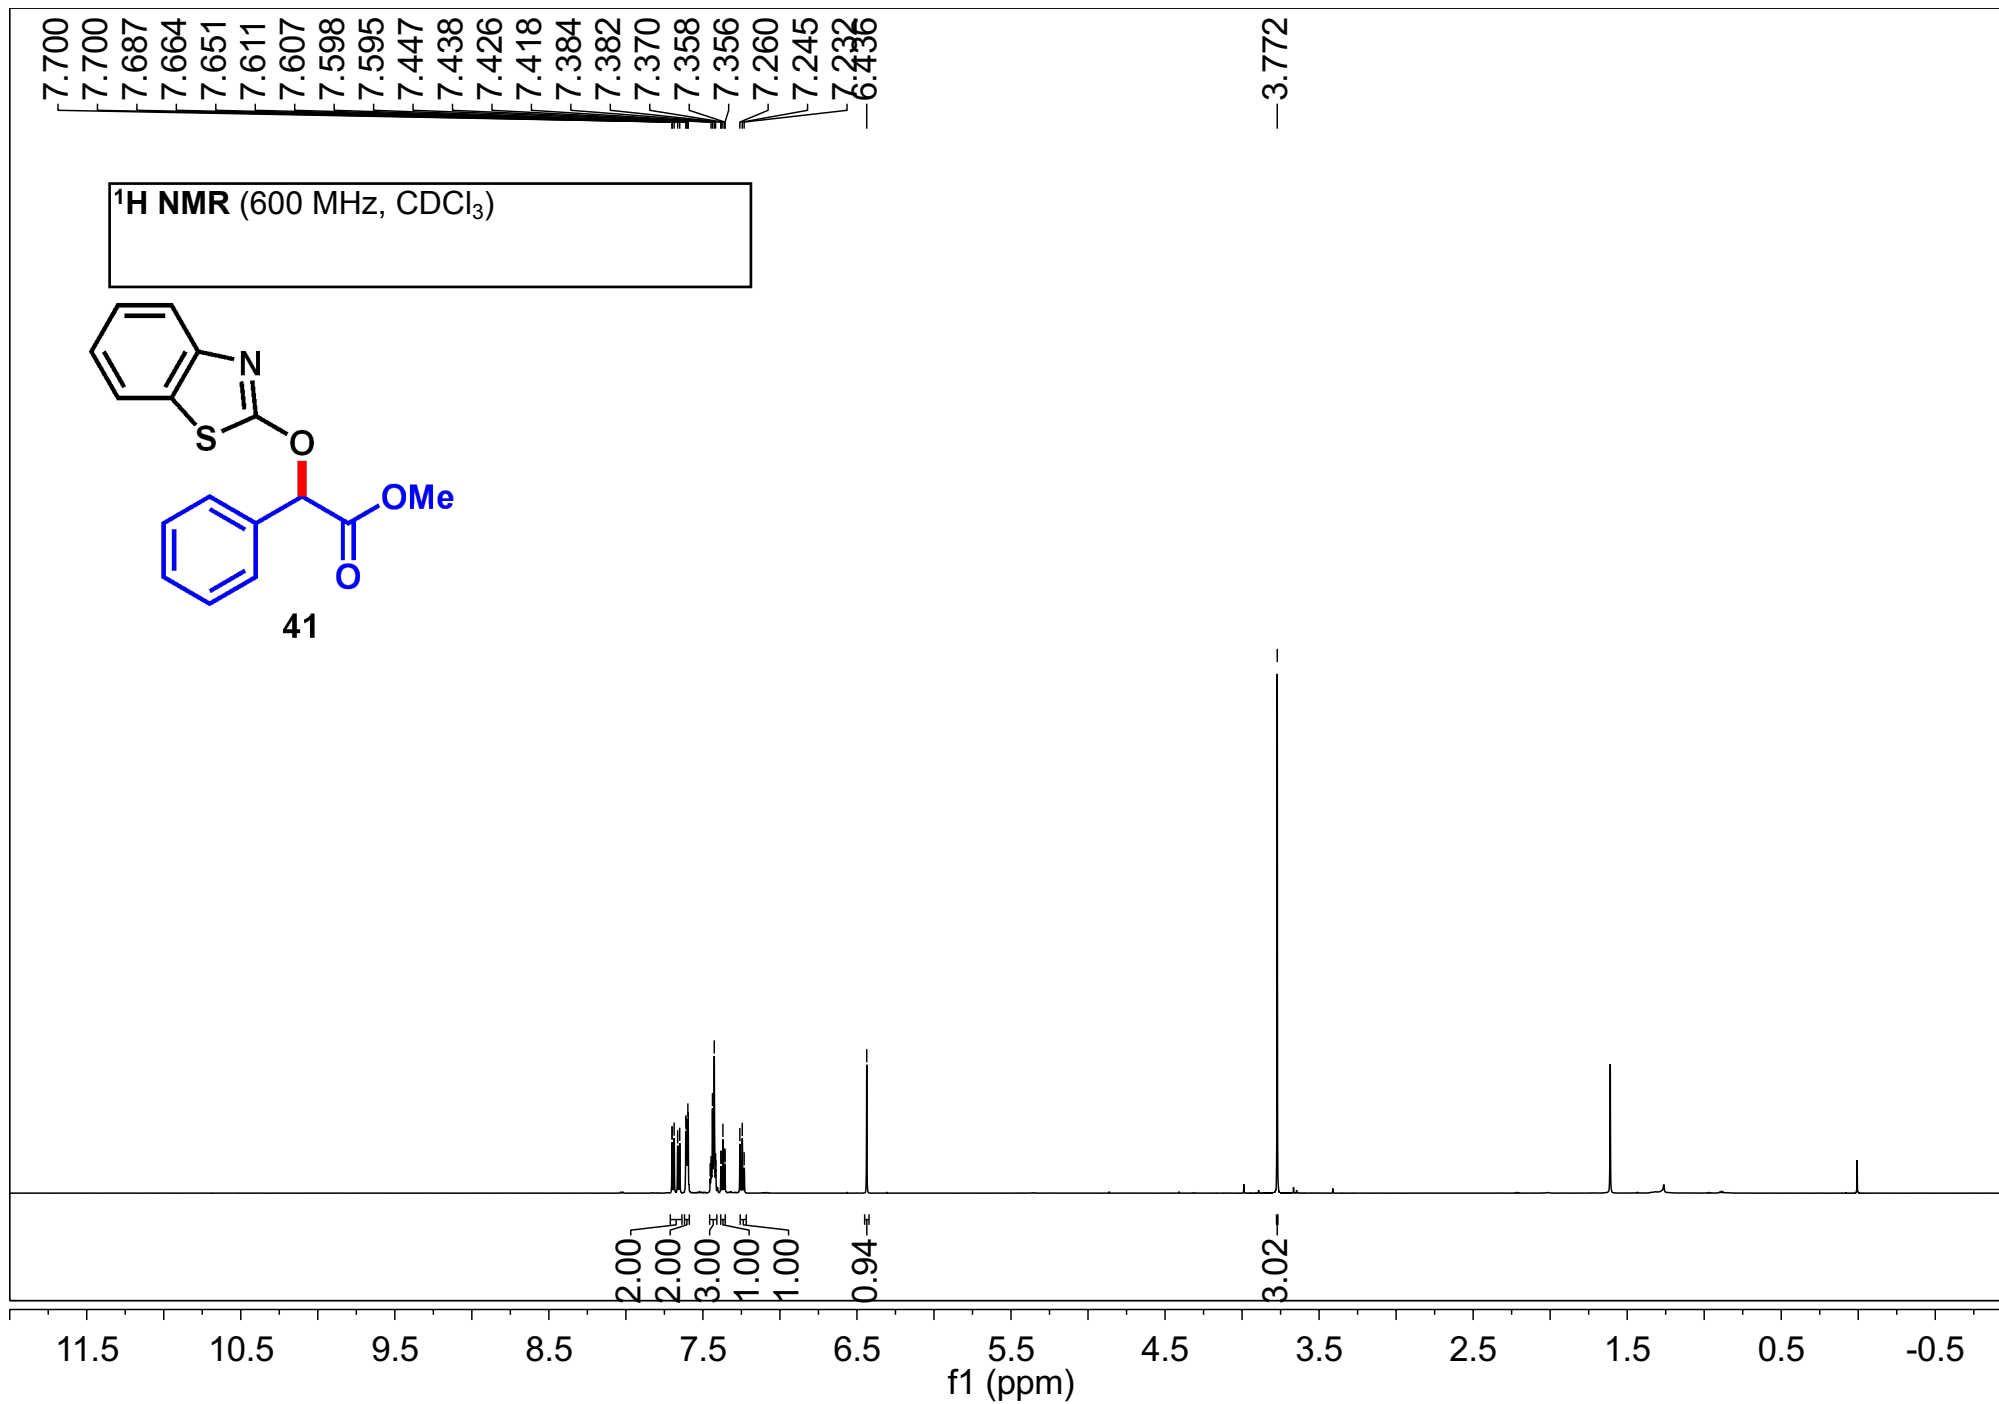



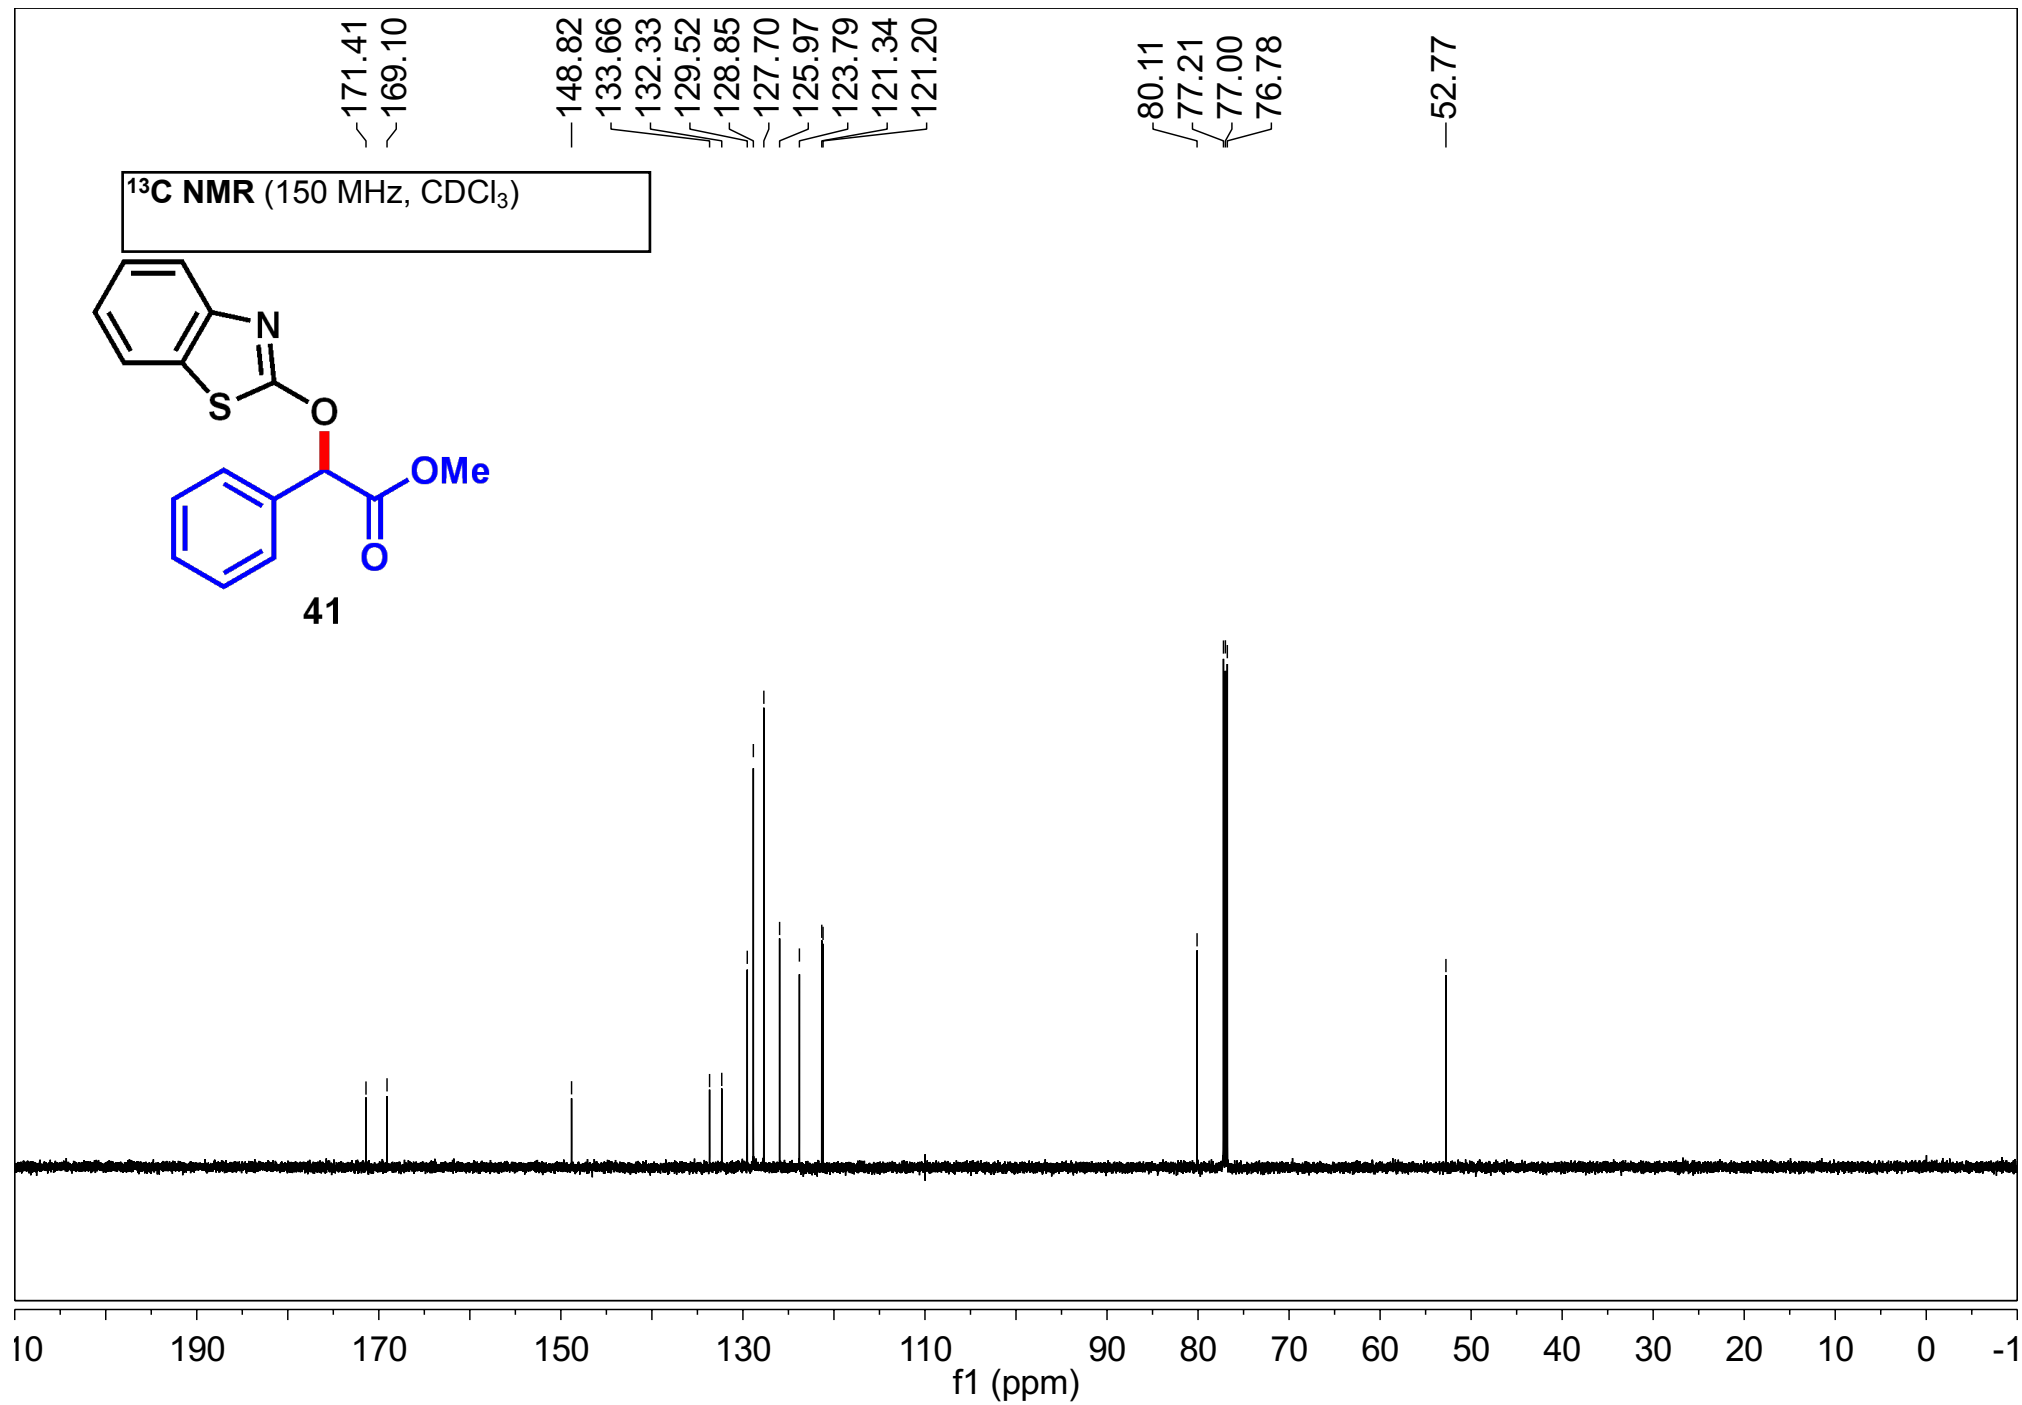

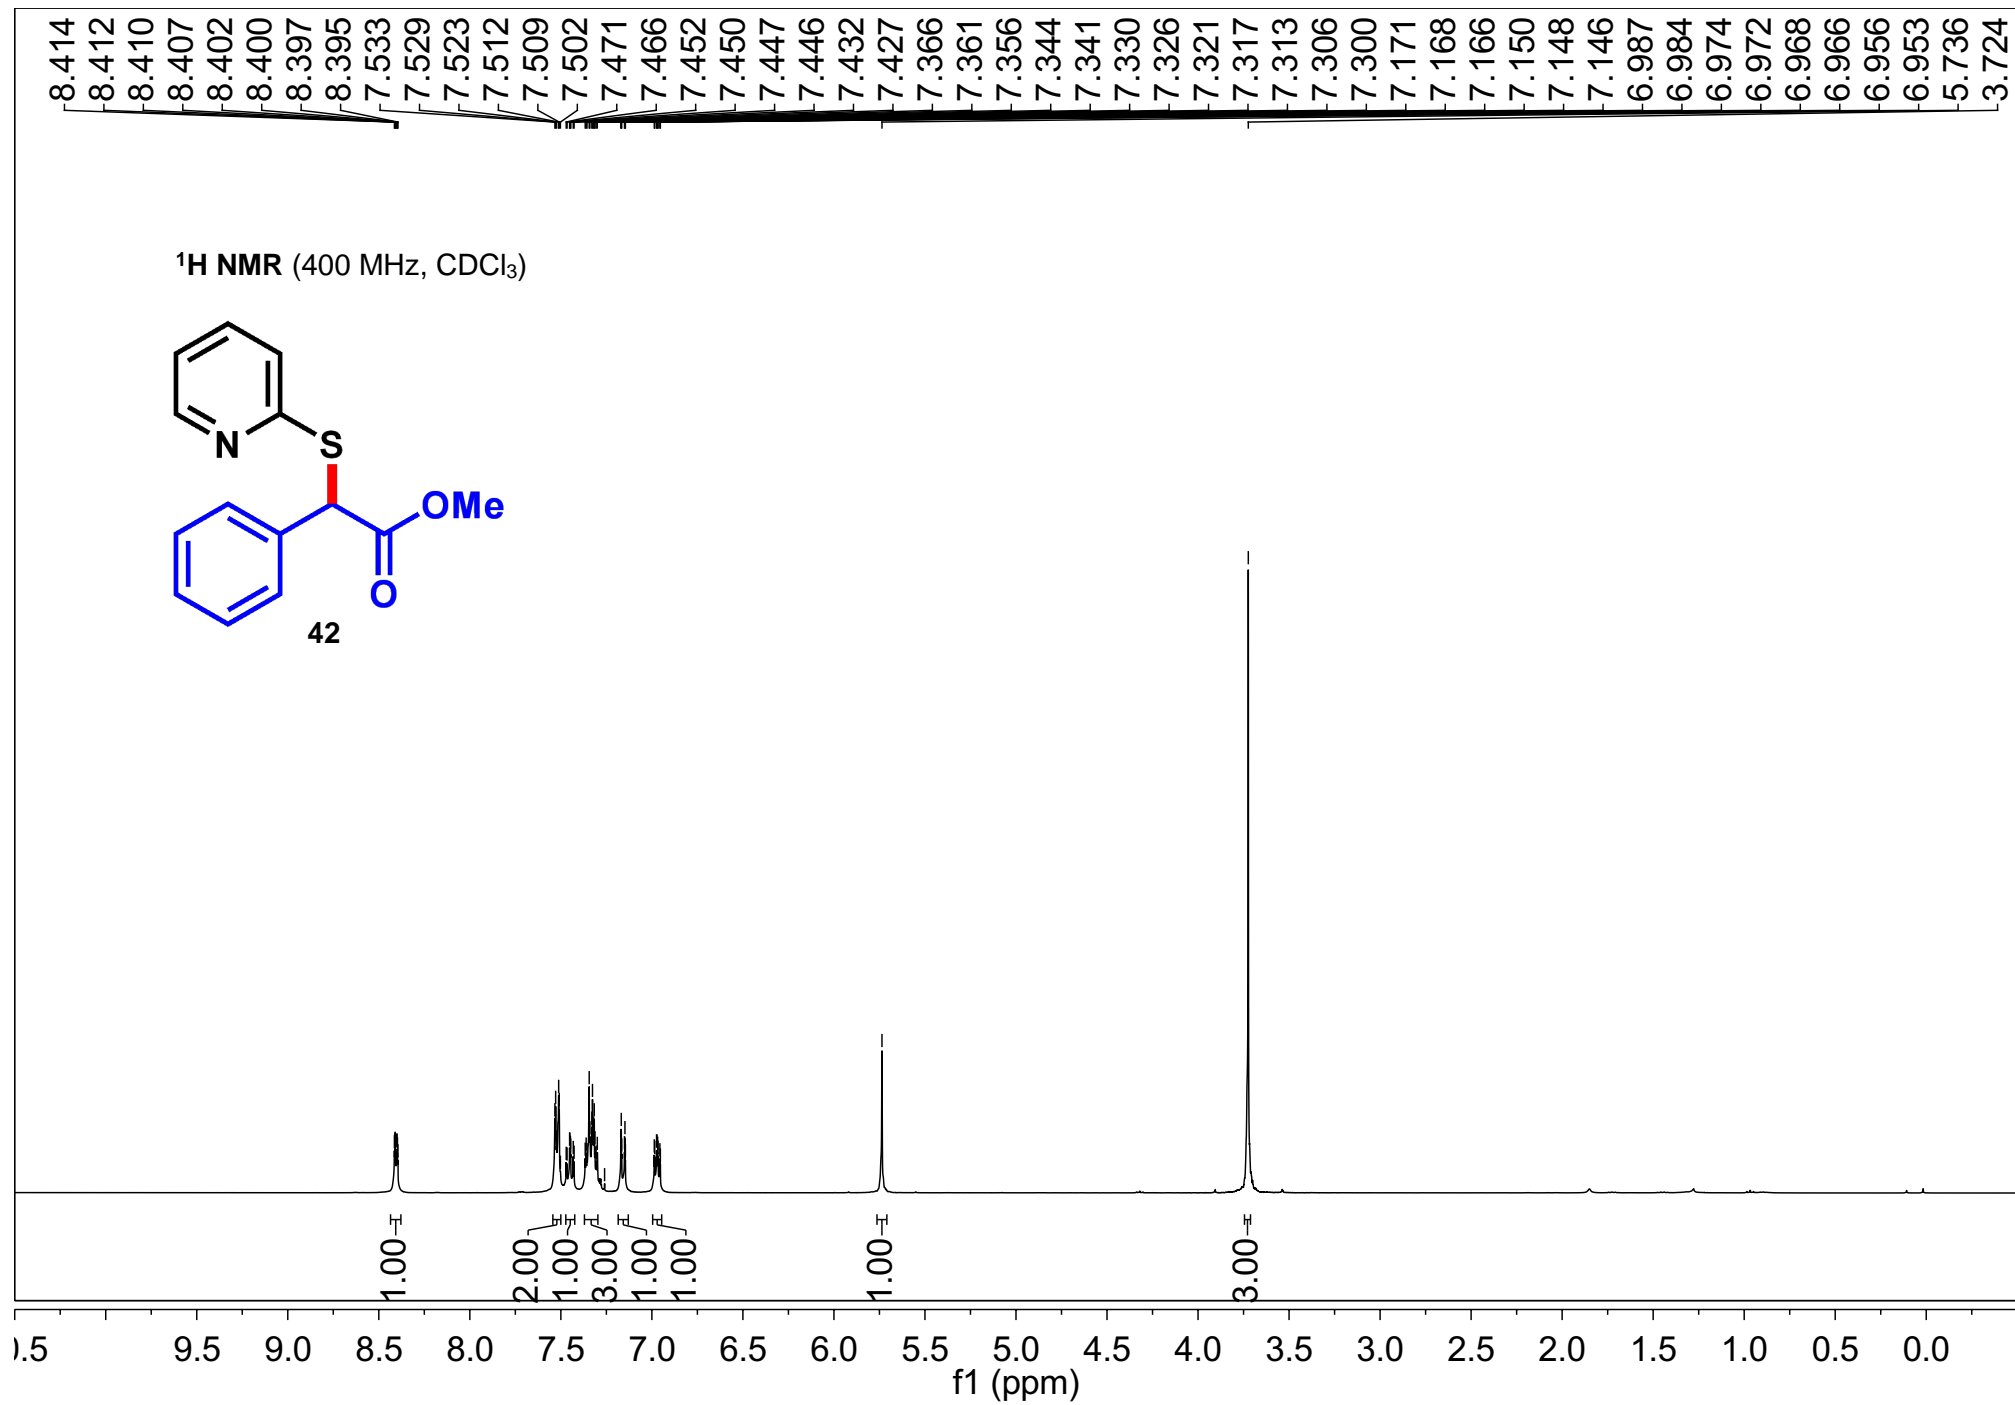

<sup>13</sup>C NMR (150 MHz, CDCl<sub>3</sub>)

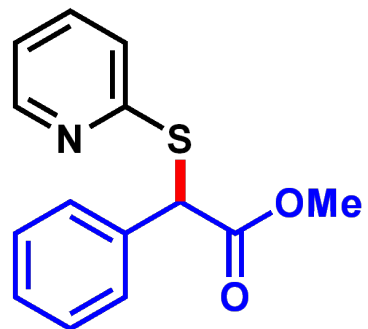

42

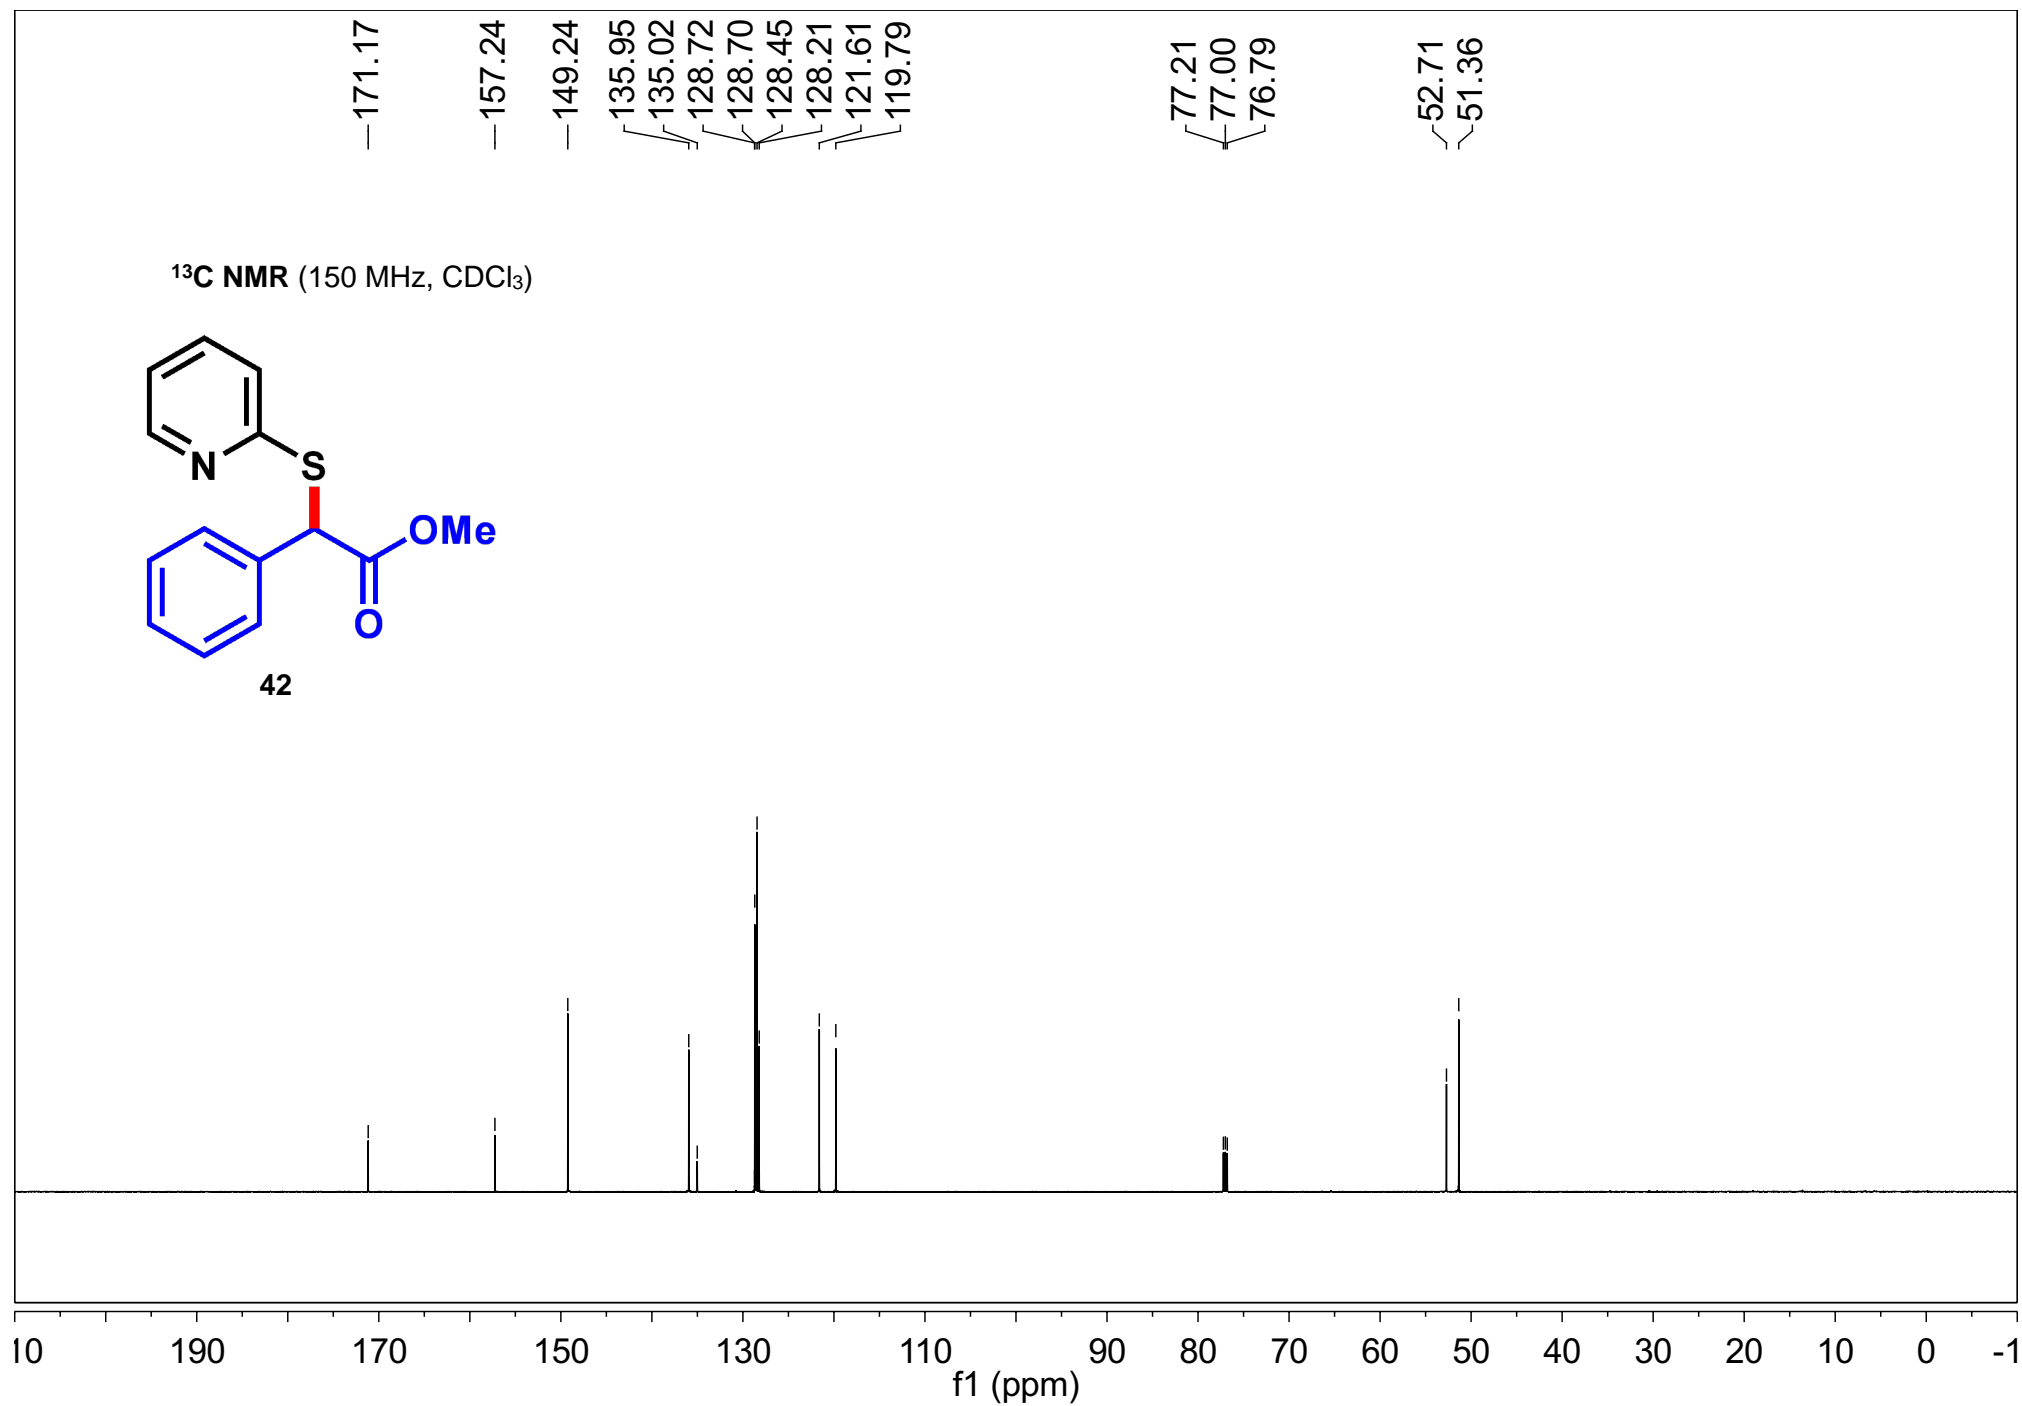

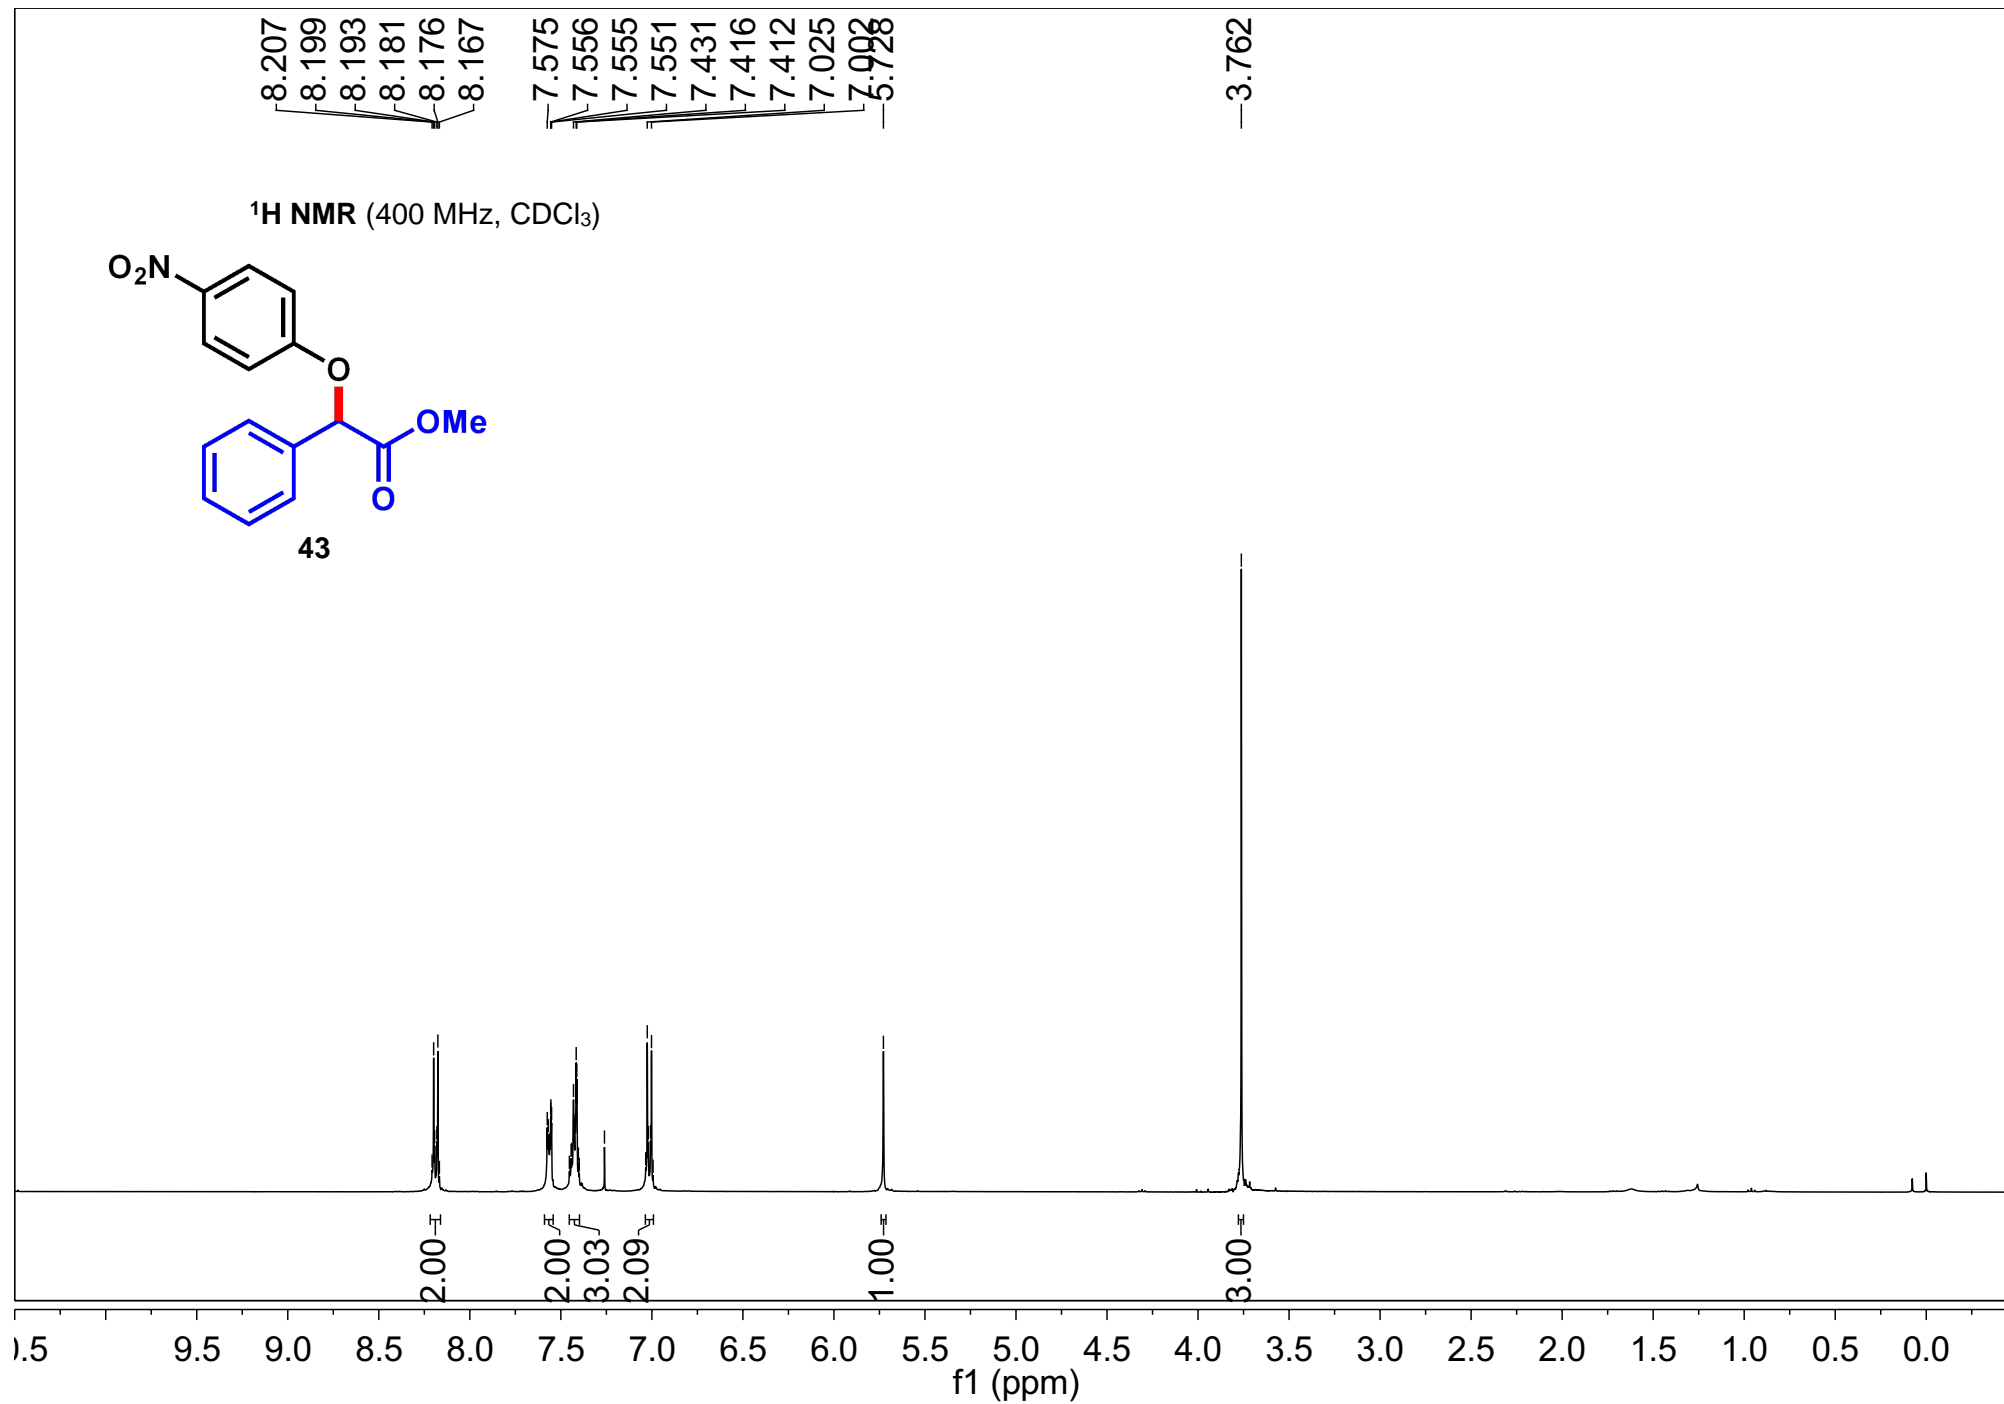

<sup>13</sup>C NMR (150 MHz, CDCl<sub>3</sub>)

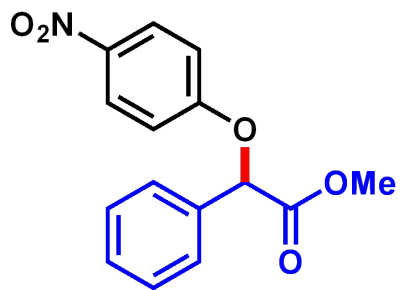

—169.15

—161.95

142.24

134.07

129.49

129.01

127.05

125.90

—115.36

78.76

77.21

77.00

76.79

—52.90

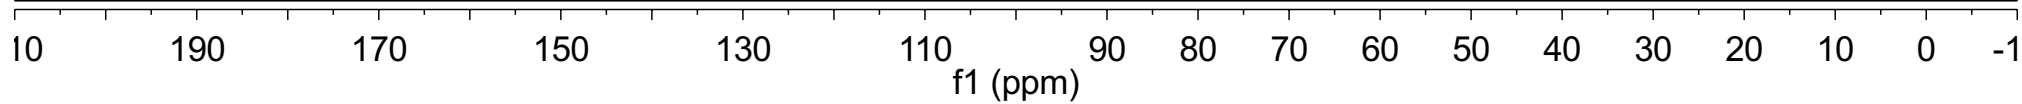

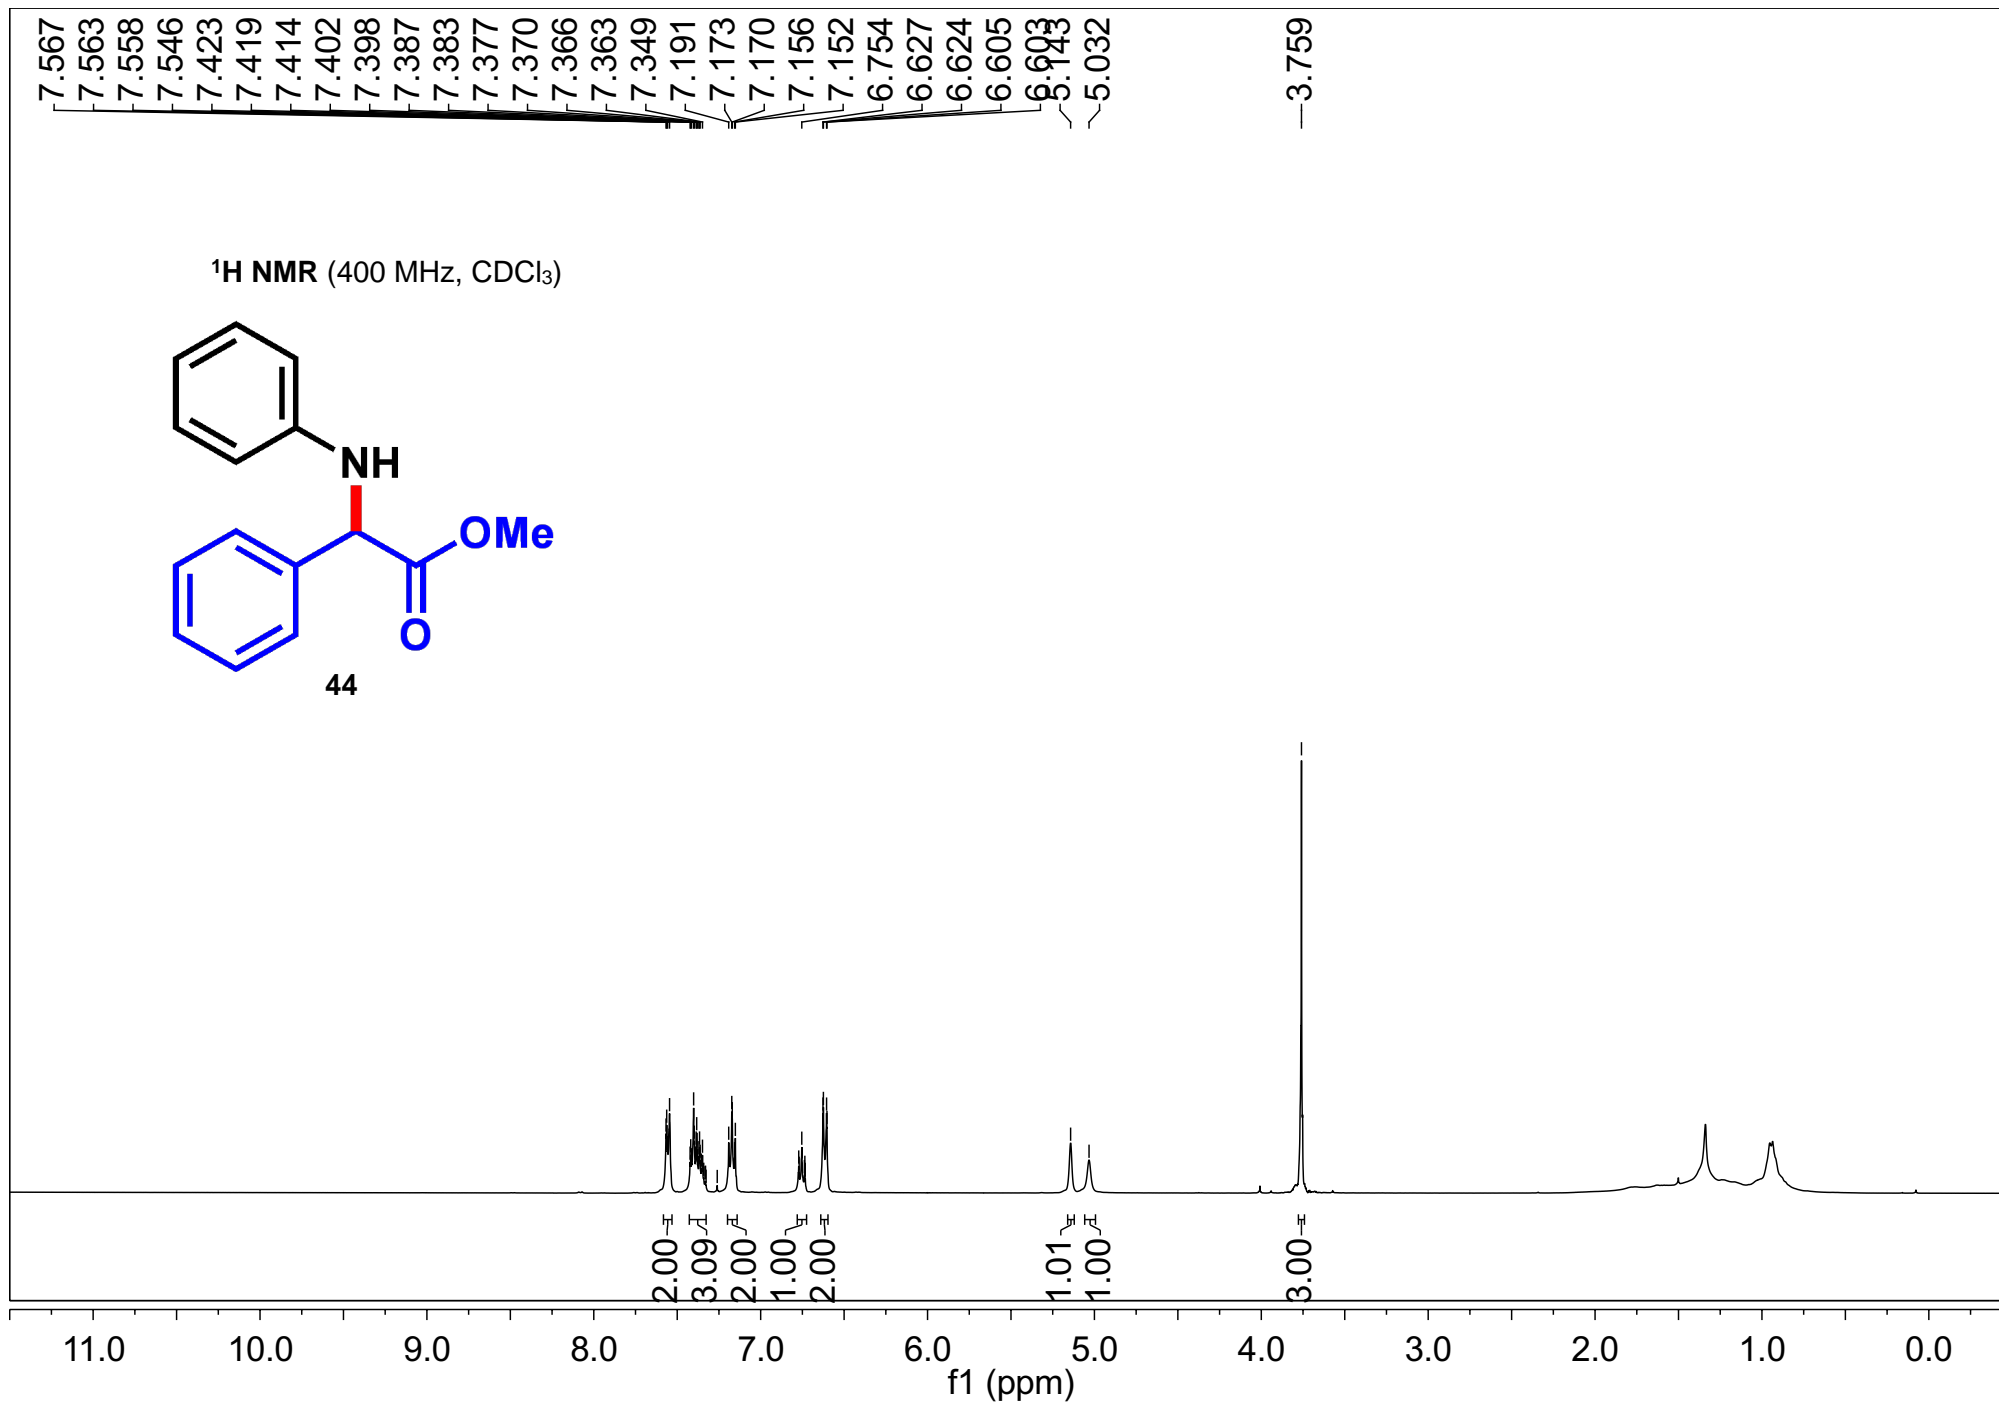

<sup>13</sup>C NMR (150 MHz, CDCl<sub>3</sub>)

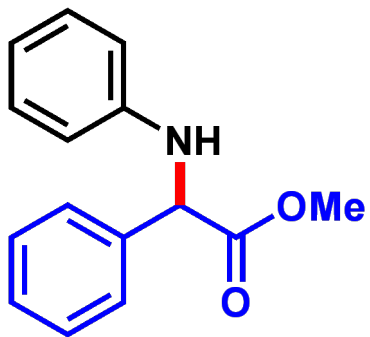

172.21

145.87

137.56

129.14

128.78

128.21

127.16

118.03

113.33

77.21

77.00

76.79

60.66

52.65



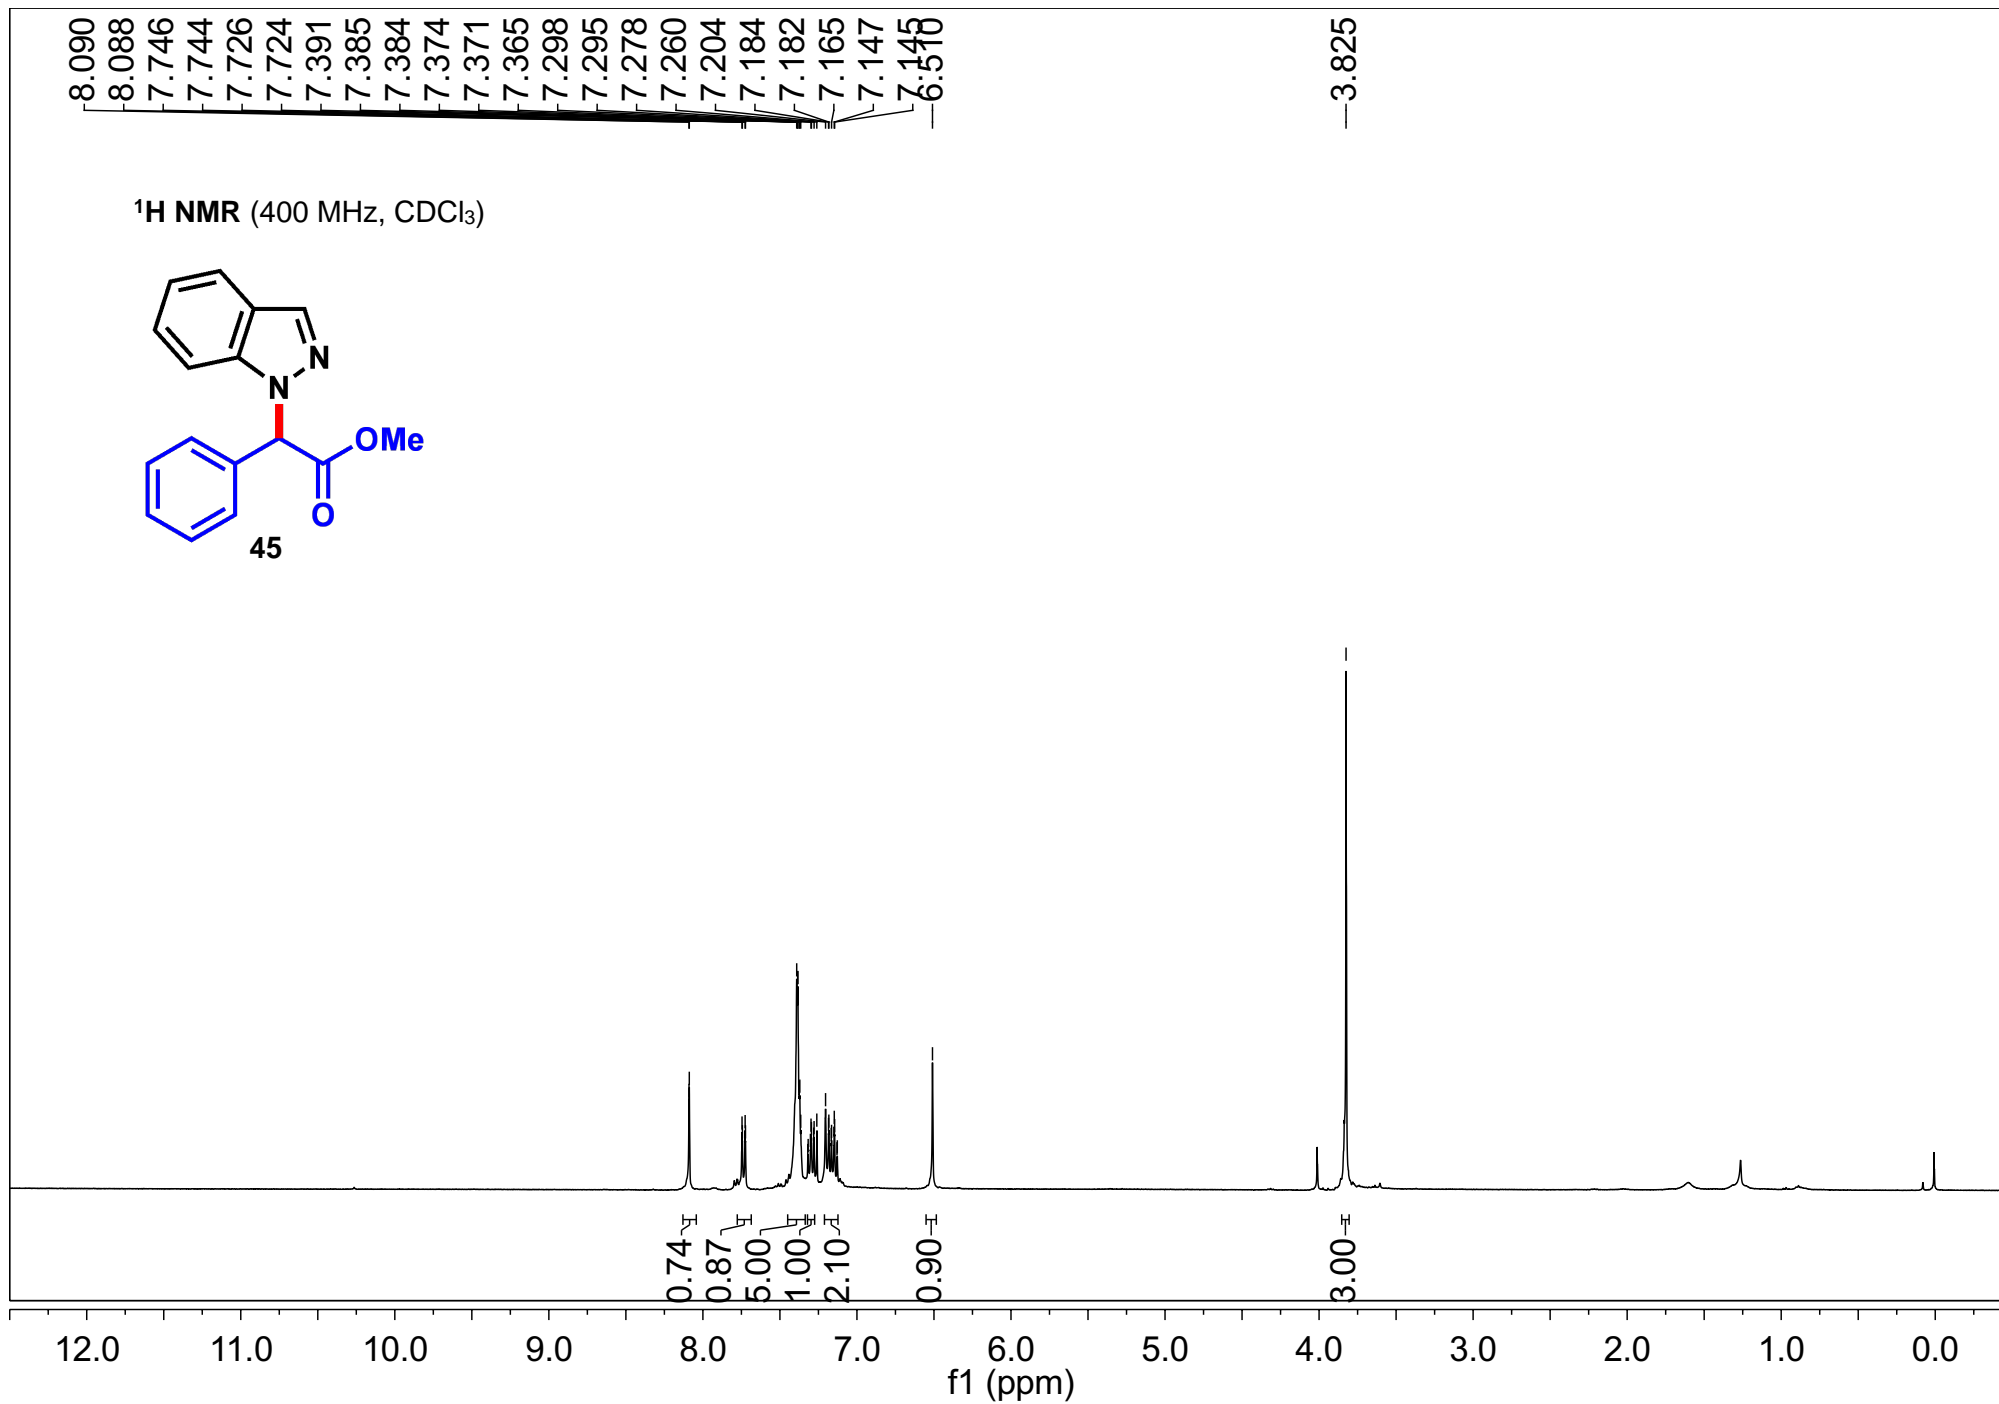



<sup>13</sup>C NMR (150 MHz, CDCl<sub>3</sub>)

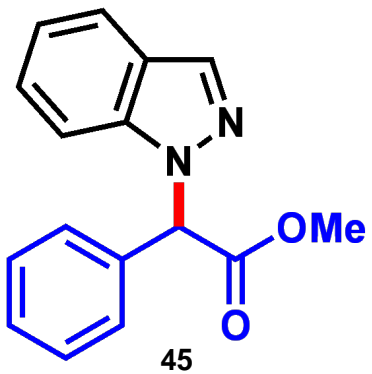

169.24  
139.77  
134.38  
134.11  
129.64  
128.81  
128.75  
128.35  
127.99  
126.56  
124.74  
121.19  
121.04  
109.86

77.21  
77.00  
76.79  
65.90  
52.85

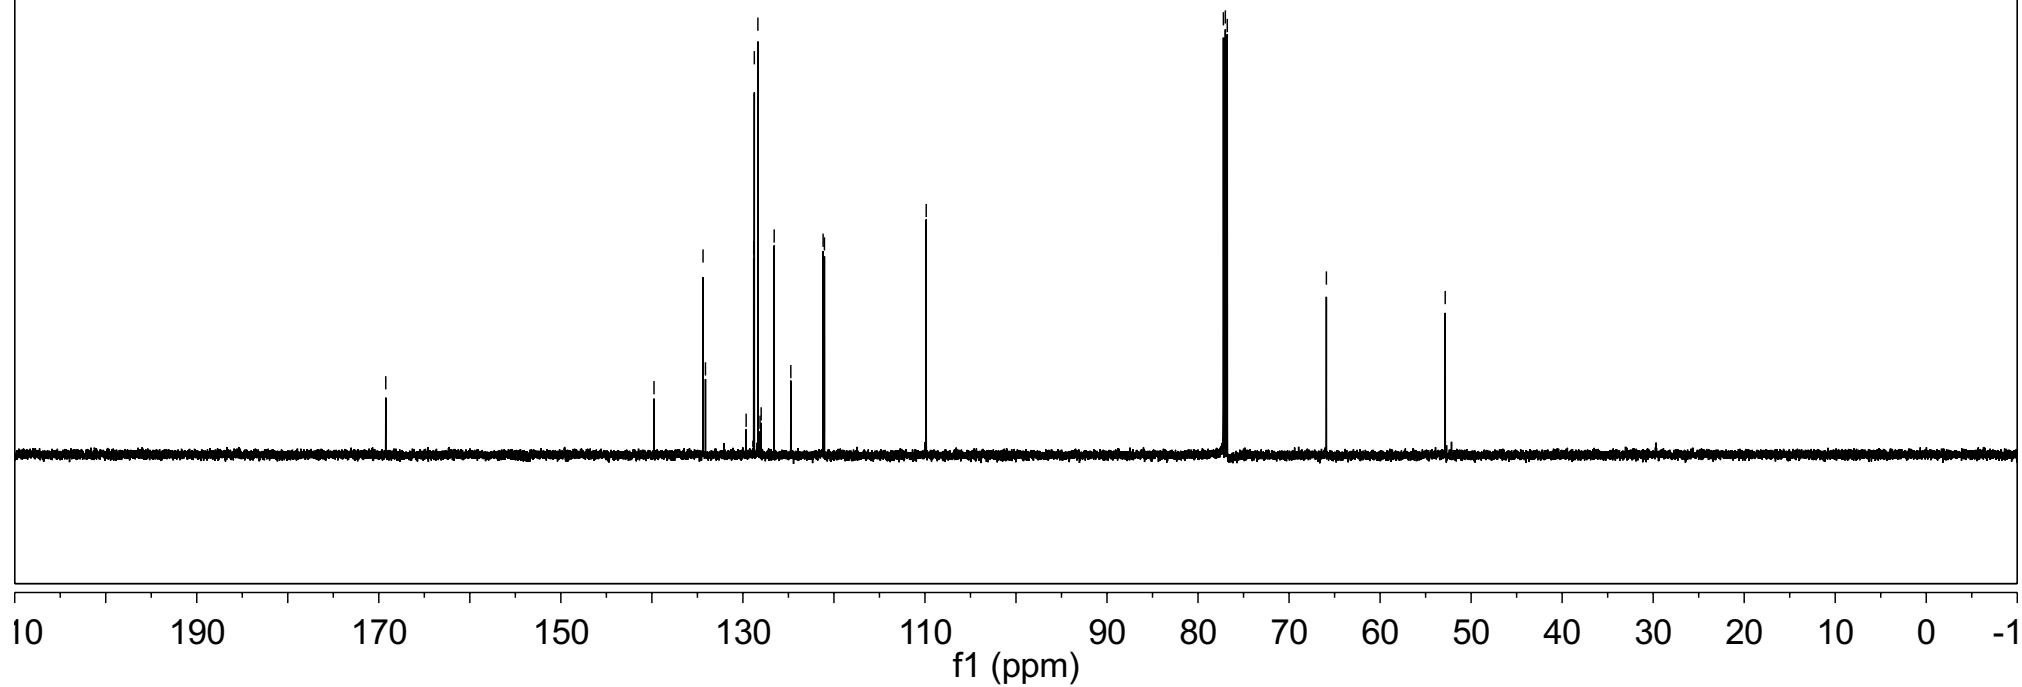

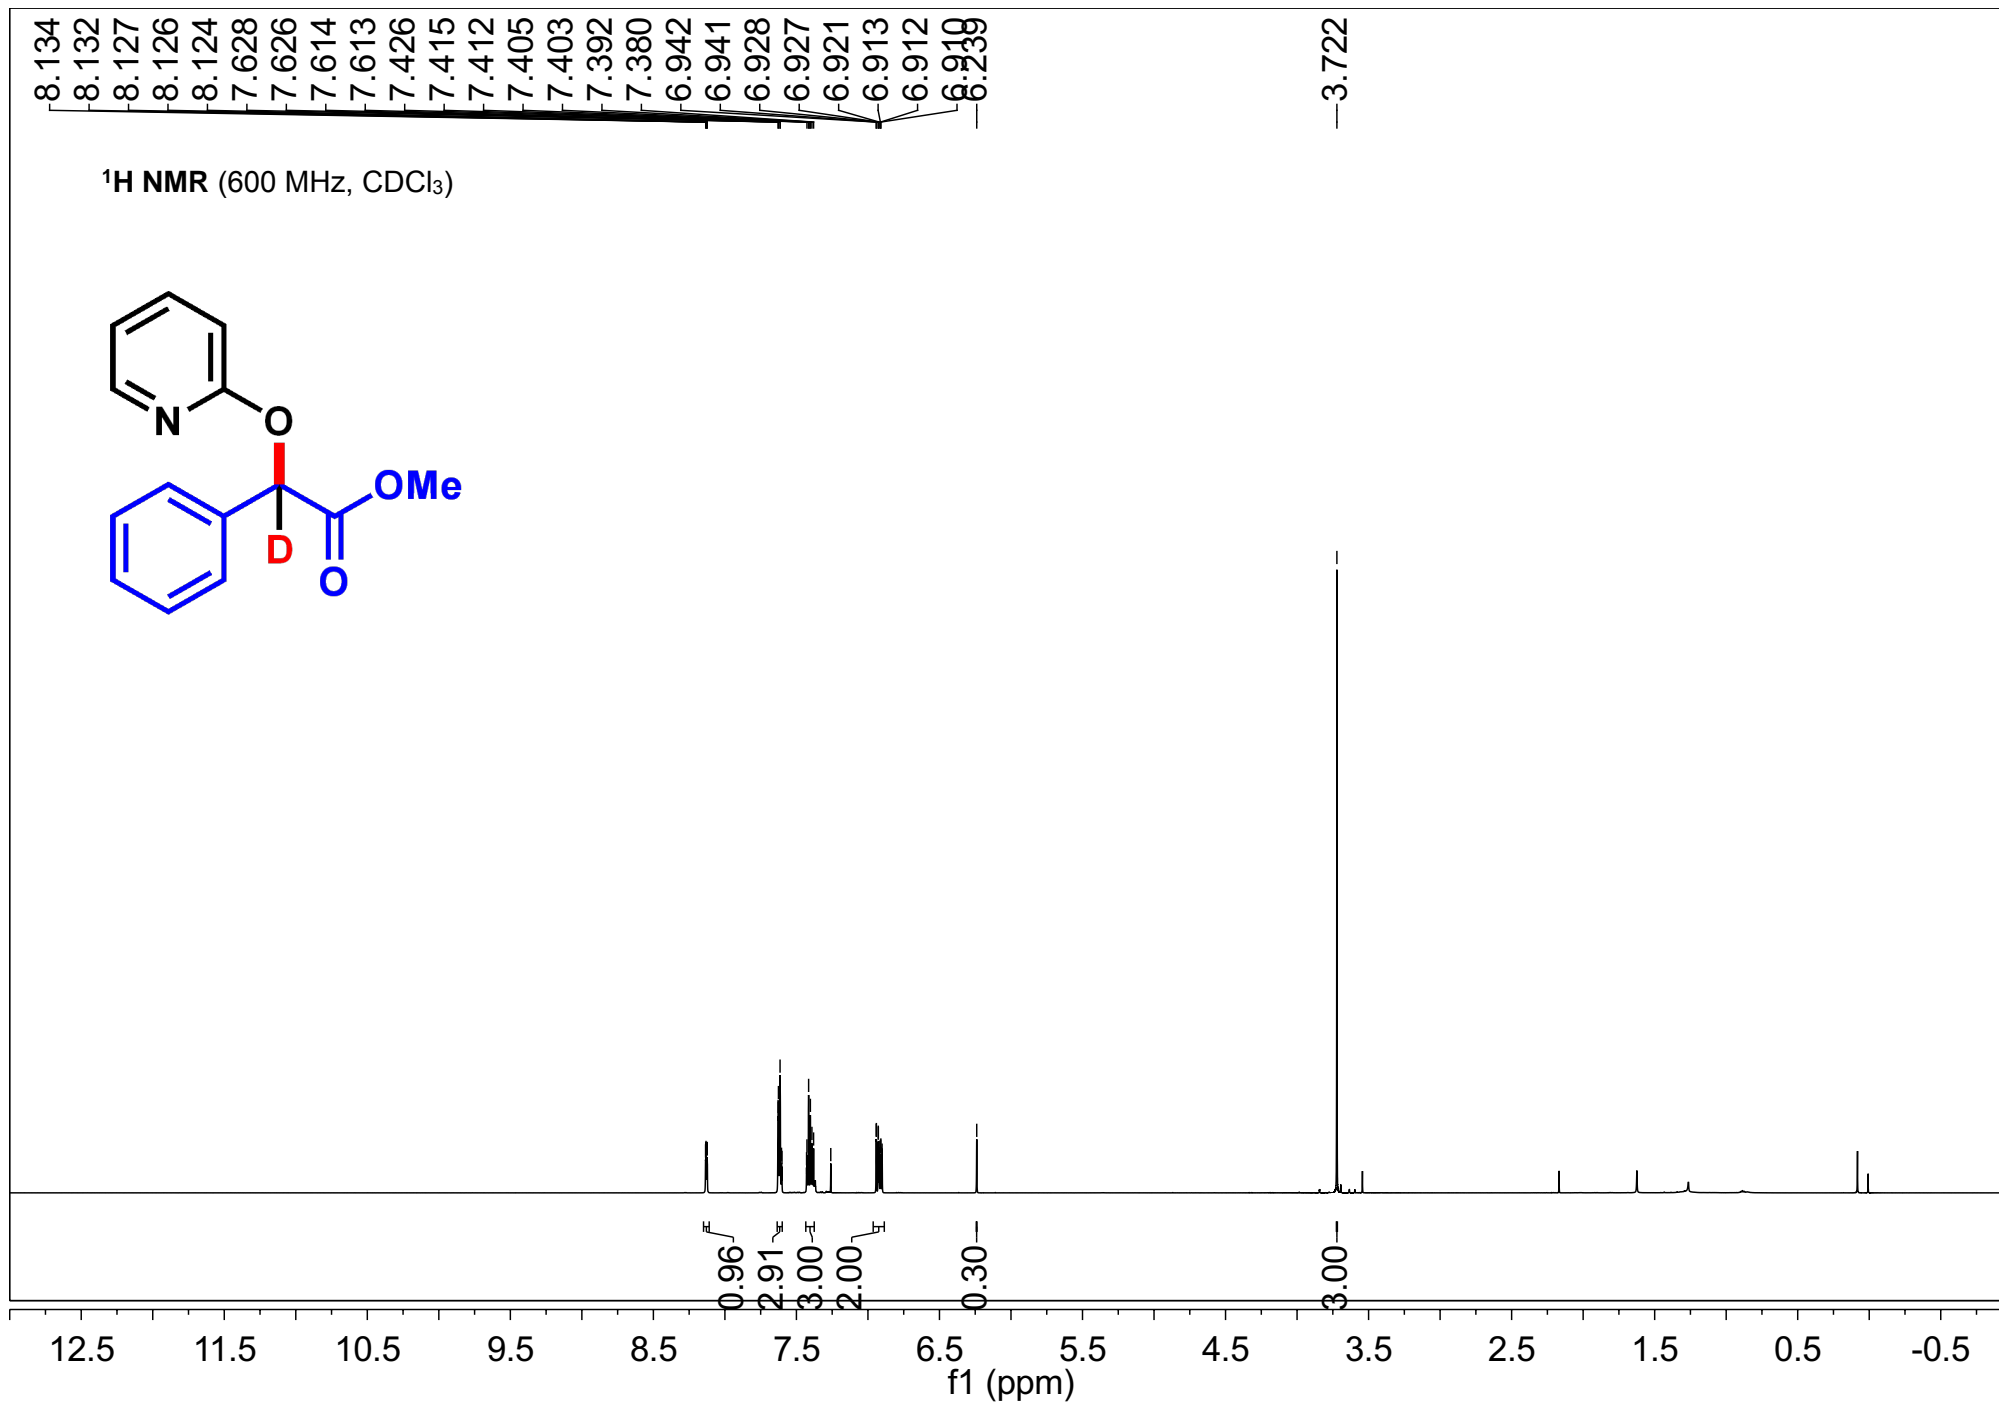

Supplement: d0ob02350g1.pdf [file d0ob02350g1.pdf]
